# Supplementary material for: Comparative Genomics Reveals Two Major Bouts of Gene Retroposition Coinciding with Crucial Periods of Symbiodinium Evolution
Source: Oxford University Press journal article supplement (doi:10.1093/gbe/evx144), 2017-08-01
Supplement: Supplementary_file_1_revise_1st_evx144.doc [file Supplementary_file_1_revise_1st_evx144.doc]

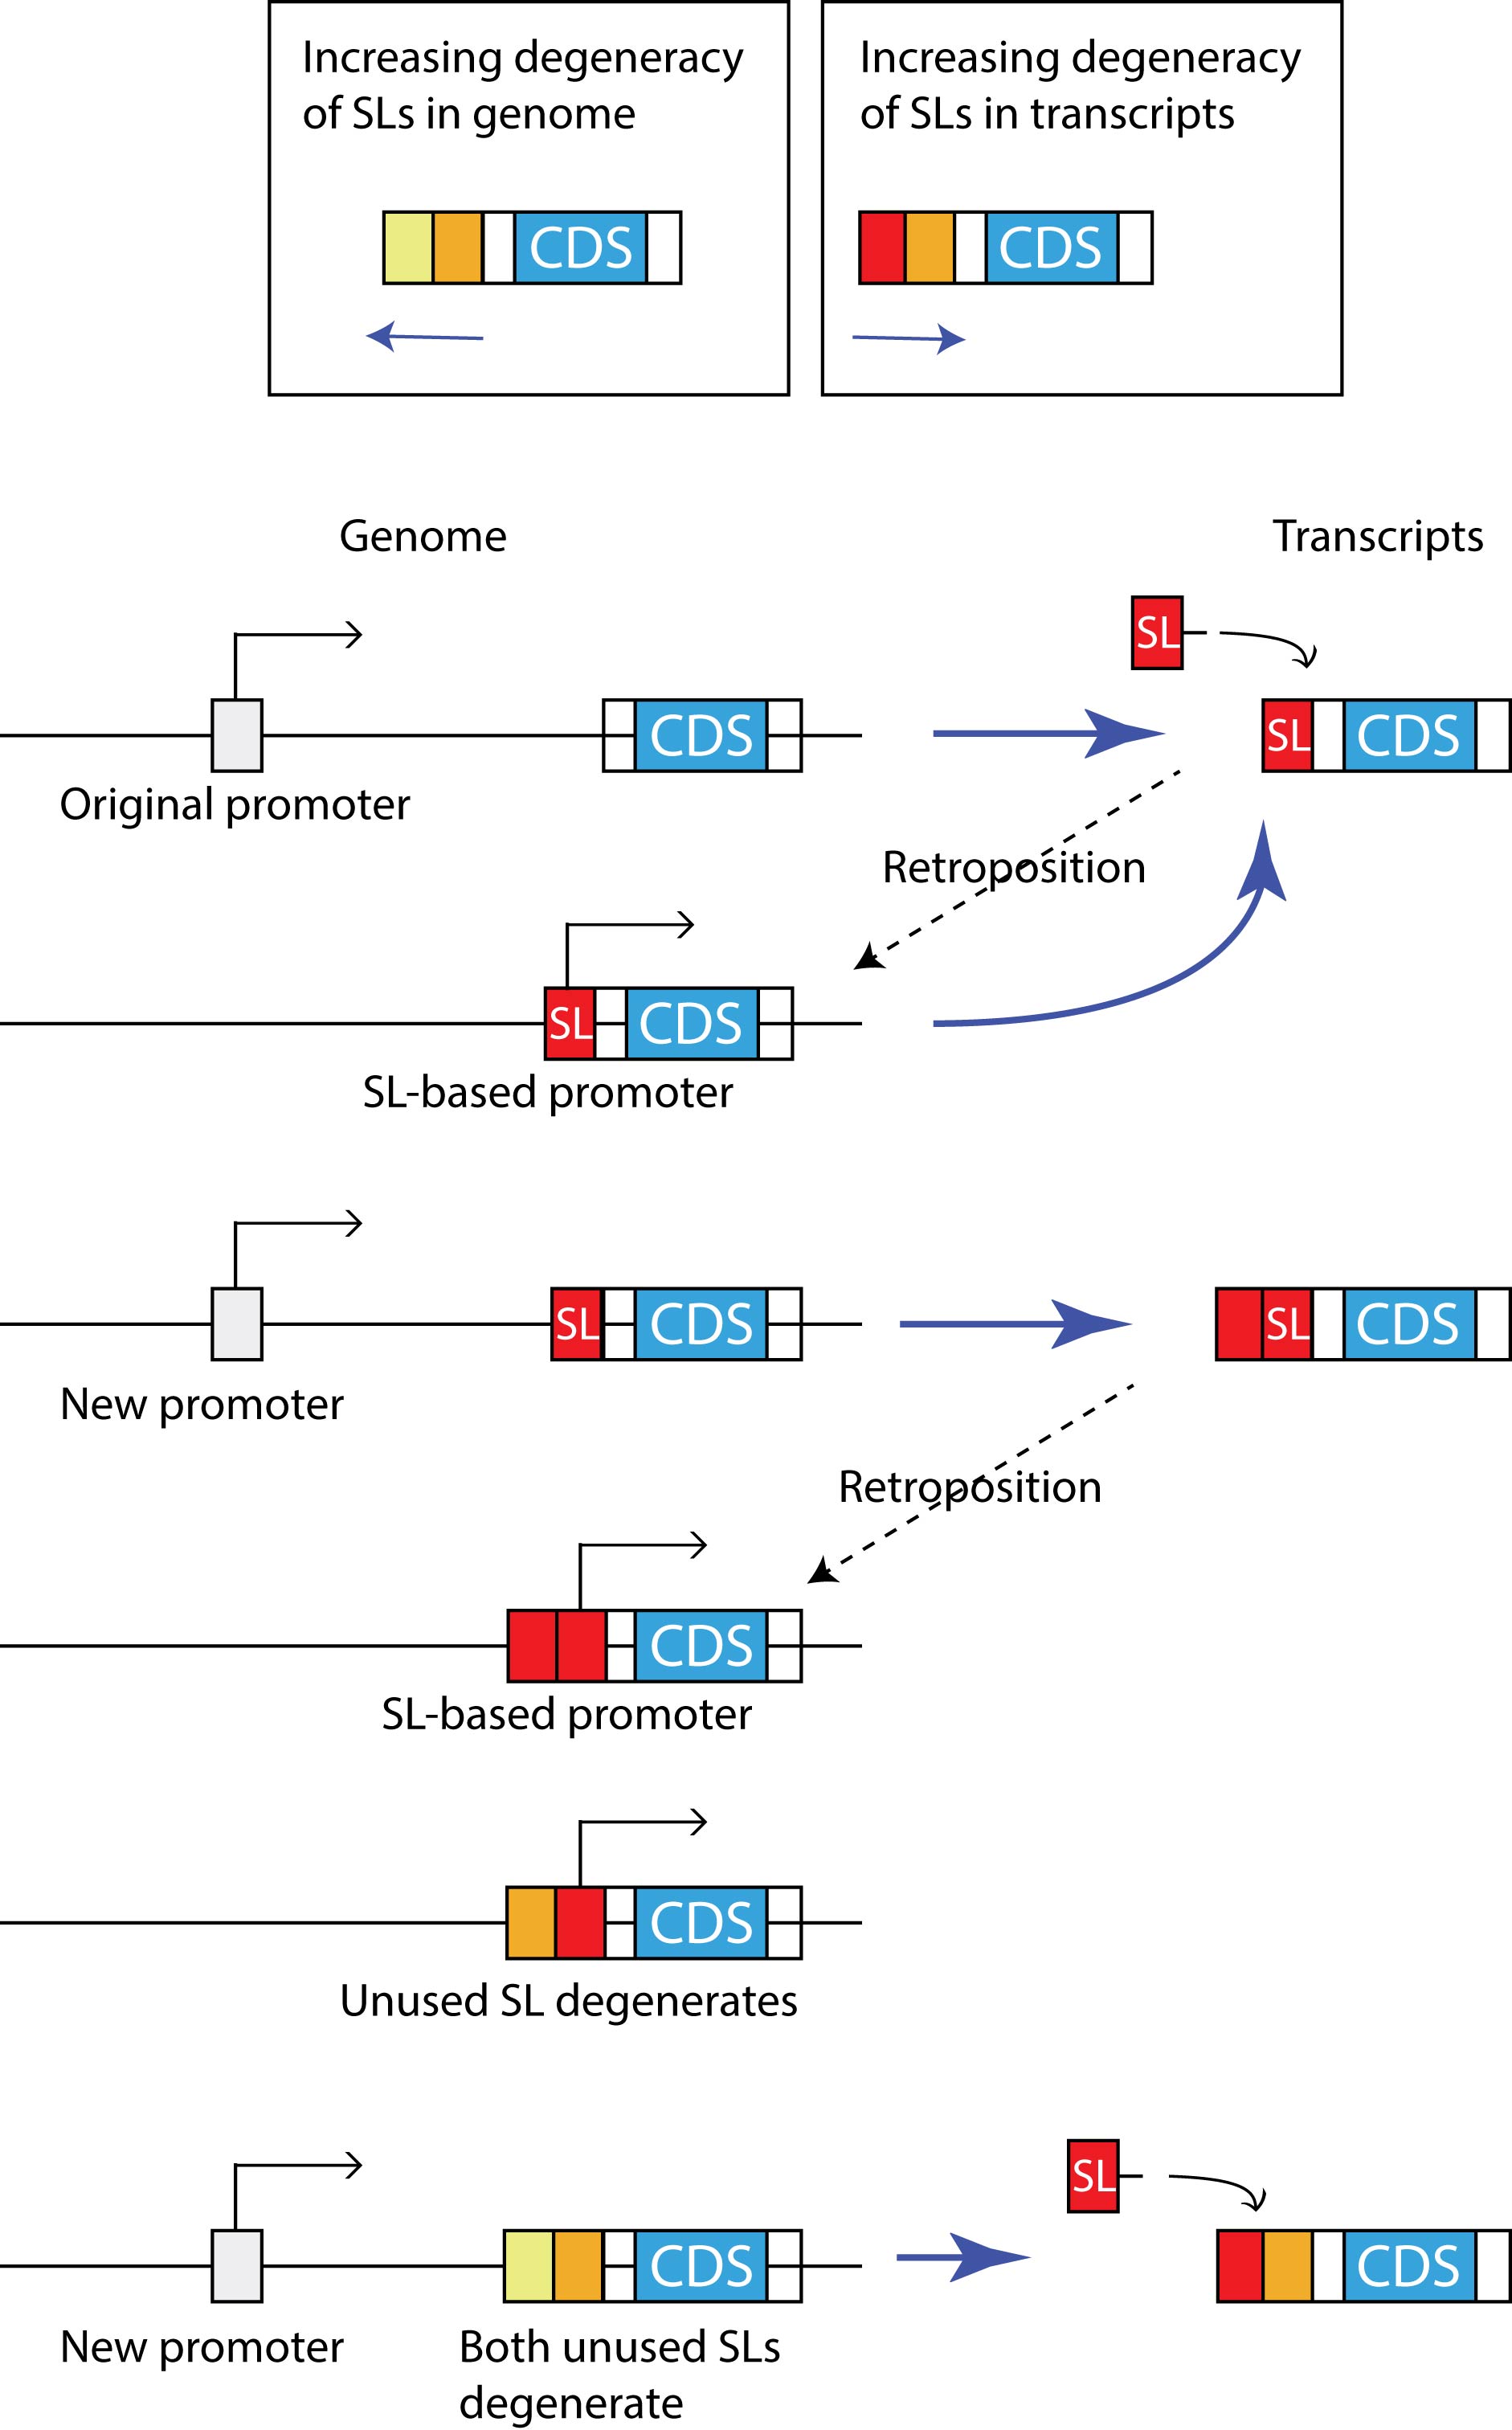


Figure S1. A scheme showing evolution paths of DinoSL relicts located at different positions. SL colors in red fading to yellow reflect an increased sequence divergence.

| Table S1. Varied conservation between motifs along DinoSL sequence | | | | |
| --- | --- | --- | --- | --- |
|  | *S. kawagutii* | | *S. minutum* | |
| DinoSL motif | No. of genes containing this DinoSL motif | Percentage of  the total retrogenes | No. of genes containing this DinoSL motif | Percentage of  the total retrogenes |
| CCGT | 400 | 4.67 | 326 | 3.49 |
| CGTA | 240 | 2.80 | 252 | 2.70 |
| GTAG | 456 | 5.32 | 432 | 4.63 |
| TAGC | 739 | 8.63 | 631 | 6.76 |
| AGCC | 1183 | 13.81 | 931 | 9.97 |
| GCCA | 1351 | 15.78 | 1213 | 12.99 |
| CCAT | 1508 | 17.61 | 1516 | 16.23 |
| CATT | 1761 | 20.56 | 1914 | 20.49 |
| ATTT | 1896 | 22.14 | 2252 | 24.11 |
| TTTT | 1952 | 22.79 | 2568 | 27.50 |
| TTTG | 2857 | 33.36 | 3136 | 33.58 |
| TTGG | 2850 | 33.28 | 2700 | 28.91 |
| TGGC | 2659 | 31.05 | 2123 | 22.73 |
| GGCT | 2570 | 30.01 | 1983 | 21.23 |
| GCTC | 2521 | 29.44 | 1955 | 20.93 |
| CTCA | 2277 | 26.59 | 1826 | 19.55 |
| TCAA | 2238 | 26.13 | 1892 | 20.26 |
| CAAG | 1816 | 21.21 | 1352 | 14.48 |

Table S2. Relative activities of *Symbiodinium* genes in the first bout.

| Family | Copy number of retrogenes | Relative activitya | Function description |
| --- | --- | --- | --- |
| ORTHOMCL0 | 11 | 3.3 | Modification methylase Eco47II |
| ORTHOMCL9 | 10 | 3 | Retrovirus-related Pol polyprotein LINE-1 |
| ORTHOMCL29 | 9 | 2.7 | DNA (cytosine-5)-methyltransferase 3B |
| ORTHOMCL3 | 7 | 2.1 | Retrovirus-related Pol polyprotein from type-2 retrotransposable element R2DM |
| ORTHOMCL12 | 7 | 2.1 | Putative F-box and FNIP repeat-containing protein L60 |
| ORTHOMCL5 | 7 | 2.1 | Pentatricopeptide repeat-containing protein At2g31400, chloroplastic |
| ORTHOMCL8 | 6 | 1.8 | Transposon TX1 uncharacterized 149 kDa protein |
| ORTHOMCL20 | 6 | 1.8 | Copia protein |
| ORTHOMCL4 | 6 | 1.8 | Ankyrin-1 |
| ORTHOMCL116 | 5 | 1.5 | Sodium channel protein type 11 subunit alpha |
| ORTHOMCL6 | 5 | 1.5 | DNA (cytosine-5)-methyltransferase 3A |
| ORTHOMCL62 | 4 | 1.2 | Phosphoenolpyruvate carboxylase |
| ORTHOMCL71 | 4 | 1.2 | Retrovirus-related Pol polyprotein from transposon TNT 1-94 |
| ORTHOMCL42 | 4 | 1.2 | Glutamine synthetase |
| ORTHOMCL48 | 3 | 0.9 | Modification methylase FnuDI |
| ORTHOMCL53 | 3 | 0.9 | Diacylglycerol O-acyltransferase 1 |
| ORTHOMCL18 | 3 | 0.9 | Ankyrin repeat domain-containing protein 50 |
| ORTHOMCL196 | 3 | 0.9 | Heat shock 70 kDa protein |
| ORTHOMCL28 | 3 | 0.9 | Probable E3 ubiquitin-protein ligase HERC2 |
| ORTHOMCL1896 | 2 | 0.6 | Kinesin-like protein KIF19 |
| ORTHOMCL102 | 2 | 0.6 | Probable E3 ubiquitin-protein ligase HERC6 |
| ORTHOMCL6580 | 2 | 0.6 | Glutaredoxin-1 |
| ORTHOMCL4683 | 2 | 0.6 | Serine/threonine-protein kinase Nek1 |
| ORTHOMCL1039 | 2 | 0.6 | Protein rhomboid |
| ORTHOMCL2968 | 2 | 0.6 | Hsp90 co-chaperone Cdc37 |
| ORTHOMCL115 | 2 | 0.6 | WD repeat, SAM and U-box domain-containing protein 1 |
| ORTHOMCL39 | 2 | 0.6 | Probable ATP-dependent RNA helicase DHX36 |
| ORTHOMCL11 | 2 | 0.6 | Sodium/calcium exchanger 2 |
| ORTHOMCL17 | 2 | 0.6 | Putative transposon Ty5-1 protein YCL074W |
| ORTHOMCL21 | 2 | 0.6 | Modification methylase NaeI |
| ORTHOMCL57 | 2 | 0.6 | Fucoxanthin-chlorophyll a-c binding protein F, chloroplastic (Fragment) |
| ORTHOMCL10292 | 2 | 0.6 | Meiosis protein mei2 |
| ORTHOMCL1306 | 2 | 0.6 | Cytochrome b559 subunit beta |
| ORTHOMCL8942 | 2 | 0.6 | Ankyrin repeat domain-containing protein 2 |
| ORTHOMCL3262 | 2 | 0.6 | Potassium voltage-gated channel subfamily H member 2 |
| ORTHOMCL338 | 2 | 0.6 | Pyruvate, phosphate dikinase |
| ORTHOMCL605 | 2 | 0.6 | 60S ribosomal export protein NMD3 |
| ORTHOMCL80 | 2 | 0.6 | Modification methylase NgoBI |
| ORTHOMCL1966 | 2 | 0.6 | Voltage-dependent L-type calcium channel subunit alpha-1C |
| ORTHOMCL3461 | 1 | 0.3 | Cyclin-dependent kinases regulatory subunit |
| ORTHOMCL5788 | 1 | 0.3 | Voltage-dependent P/Q-type calcium channel subunit alpha-1A |
| ORTHOMCL3808 | 1 | 0.3 | Modification methylase HaeII |
| ORTHOMCL1063 | 1 | 0.3 | Uncharacterized protein R408 |
| ORTHOMCL4457 | 1 | 0.3 | Calcium-binding protein 4 |
| ORTHOMCL77 | 1 | 0.3 | Xylosyltransferase 2 |
| ORTHOMCL1566 | 1 | 0.3 | Protein PF14 0175 |
| ORTHOMCL1499 | 1 | 0.3 | Apocytochrome f |
| ORTHOMCL316 | 1 | 0.3 | Pentatricopeptide repeat-containing protein At5g04810, chloroplastic |
| ORTHOMCL195 | 1 | 0.3 | Putative fumarate reductase |
| ORTHOMCL1155 | 1 | 0.3 | MORN repeat-containing protein 3 |
| ORTHOMCL1782 | 1 | 0.3 | Mitogen-activated protein kinase homolog D5 |
| ORTHOMCL1755 | 1 | 0.3 | LINE-1 reverse transcriptase homolog |
| ORTHOMCL127 | 1 | 0.3 | Probable hemoglobin and hemoglobin-haptoglobin-binding protein 3 |
| ORTHOMCL5744 | 1 | 0.3 | Calcium-binding allergen Ole e 8 |
| ORTHOMCL65 | 1 | 0.3 | Transposon Ty1-LR1 Gag-Pol polyprotein |
| ORTHOMCL4372 | 1 | 0.3 | DNA-binding protein HEXBP |
| ORTHOMCL12429 | 1 | 0.3 | Dynamin-1-like protein |
| ORTHOMCL4048 | 1 | 0.3 | ATP-dependent (S)-NAD(P)H-hydrate dehydratase |
| ORTHOMCL1592 | 1 | 0.3 | Photosystem I reaction center subunit XI |
| ORTHOMCL82 | 1 | 0.3 | Probable RNA-directed DNA polymerase from transposon X-element |
| ORTHOMCL14355 | 1 | 0.3 | Uncharacterized mitochondrial protein AtMg00810 |
| ORTHOMCL728 | 1 | 0.3 | Uncharacterized serine-rich protein C13G6.10c |
| ORTHOMCL7893 | 1 | 0.3 | 40S ribosomal protein S7 |
| ORTHOMCL178 | 1 | 0.3 | Phthiocerol/phenolphthiocerol synthesis polyketide synthase type I PpsE |
| ORTHOMCL1898 | 1 | 0.3 | Thiol protease SEN102 |
| ORTHOMCL7218 | 1 | 0.3 | Probable 2-ketogluconate reductase |
| ORTHOMCL201 | 1 | 0.3 | Nucleoside diphosphate kinase 7 |
| ORTHOMCL735 | 1 | 0.3 | Tubby-like F-box protein 1 |
| ORTHOMCL906 | 1 | 0.3 | DnaJ homolog subfamily B member 6-A |
| ORTHOMCL896 | 1 | 0.3 | Probable L-ascorbate peroxidase 3 |
| ORTHOMCL130 | 1 | 0.3 | Modification methylase HhaI |
| ORTHOMCL89 | 1 | 0.3 | ATP-dependent DNA helicase PIF1 |
| ORTHOMCL3595 | 1 | 0.3 | RING finger protein 145 |
| ORTHOMCL7595 | 1 | 0.3 | Protein transport protein sft2 |
| ORTHOMCL2593 | 1 | 0.3 | Potassium/sodium hyperpolarization-activated cyclic nucleotide-gated channel 4 |
| ORTHOMCL599 | 1 | 0.3 | Putative methyltransferase Jann 4284 |
| ORTHOMCL824 | 1 | 0.3 | Geranylgeranyl diphosphate reductase, chloroplastic |
| ORTHOMCL250 | 1 | 0.3 | Histone H3.3 |
| ORTHOMCL8177 | 1 | 0.3 | GDT1-like protein sll0615 |
| ORTHOMCL2228 | 1 | 0.3 | Thaumatin-like protein 1 |
| ORTHOMCL222 | 1 | 0.3 | PI-PLC X domain-containing protein 3 |
| ORTHOMCL1899 | 1 | 0.3 | Calcium-dependent protein kinase 4 |
| ORTHOMCL712 | 1 | 0.3 | VMS1 homolog C1827.04 |
| ORTHOMCL12045 | 1 | 0.3 | Putative diacyglycerol O-acyltransferase Mb3115 |
| ORTHOMCL184 | 1 | 0.3 | Modification methylase MthTI |
| ORTHOMCL1484 | 1 | 0.3 | Collagen-like protein V6 |
| ORTHOMCL16 | 1 | 0.3 | Putative surface protein bspA-like |
| ORTHOMCL4684 | 1 | 0.3 | Malate dehydrogenase, mitochondrial |
| ORTHOMCL1010 | 1 | 0.3 | Uncharacterized peptidase C1-like protein L477 |
| ORTHOMCL2085 | 1 | 0.3 | Integral membrane protein GPR155 |
| ORTHOMCL1865 | 1 | 0.3 | Light-harvesting complex I LH38 proteins (Fragment) |
| ORTHOMCL1070 | 1 | 0.3 | Threonine synthase |
| ORTHOMCL4678 | 1 | 0.3 | Glyceraldehyde-3-phosphate dehydrogenase |
| ORTHOMCL1574 | 1 | 0.3 | Long-chain-fatty-acid--CoA ligase ACSBG2 |
| ORTHOMCL4437 | 1 | 0.3 | Ankyrin repeat and sterile alpha motif domain-containing protein 1B |
| ORTHOMCL226 | 1 | 0.3 | DNA topoisomerase 2 |
| ORTHOMCL105 | 1 | 0.3 | Spondin-1 |
| ORTHOMCL13607 | 1 | 0.3 | Dynein heavy chain 7, axonemal |
| ORTHOMCL38 | 1 | 0.3 | Sodium-coupled neutral amino acid transporter 2 |
| ORTHOMCL12897 | 1 | 0.3 | Octopine dehydrogenase |
| ORTHOMCL173 | 1 | 0.3 | Ribonuclease H |
| ORTHOMCL1096 | 1 | 0.3 | Probable phospholipid-transporting ATPase IB |
| ORTHOMCL569 | 1 | 0.3 | Serine/threonine-protein phosphatase PP2A-5 catalytic subunit |
| ORTHOMCL524 | 1 | 0.3 | Magnesium transporter NIPA2 |
| ORTHOMCL1508 | 1 | 0.3 | Cysteine synthase |
| ORTHOMCL13555 | 1 | 0.3 | Uncharacterized glycosyltransferase C2F3.01 |
| ORTHOMCL688 | 1 | 0.3 | DEAD-box ATP-dependent RNA helicase 14 |
| ORTHOMCL10303 | 1 | 0.3 | Cation channel sperm-associated protein 1 |
| ORTHOMCL229 | 1 | 0.3 | Heat shock protein 90 |
| ORTHOMCL1567 | 1 | 0.3 | Probable serine/threonine-protein kinase roco7 |
| ORTHOMCL959 | 1 | 0.3 | SCF ubiquitin ligase complex protein SKP1a |
| ORTHOMCL2500 | 1 | 0.3 | Phosphoglycerate kinase 2 |
| ORTHOMCL1723 | 1 | 0.3 | Probable E3 ubiquitin-protein ligase HERC1 |
| ORTHOMCL14984 | 1 | 0.3 | Transposon Ty4-H Gag-Pol polyprotein |
| ORTHOMCL175 | 1 | 0.3 | ABC transporter A family member 1 |
| ORTHOMCL508 | 1 | 0.3 | EF-hand domain-containing protein 1 |
| ORTHOMCL2345 | 1 | 0.3 | Protein O-linked-mannose beta-1,2-N-acetylglucosaminyltransferase 1 |
| ORTHOMCL177 | 1 | 0.3 | High affinity cGMP-specific 3',5'-cyclic phosphodiesterase 9A |
| ORTHOMCL50 | 1 | 0.3 | Dynein alpha chain, flagellar outer arm |
| ORTHOMCL270 | 1 | 0.3 | Internalin-A |
| ORTHOMCL1396 | 1 | 0.3 | Nicotinamide phosphoribosyltransferase |
| ORTHOMCL35 | 1 | 0.3 | Putative ankyrin repeat protein MM 0045 |
| ORTHOMCL1530 | 1 | 0.3 | Probable citrate synthase, mitochondrial |
| ORTHOMCL1523 | 1 | 0.3 | Uncharacterized protein C14orf166B |
| ORTHOMCL13505 | 1 | 0.3 | Transmembrane protein 41 homolog |
| ORTHOMCL10916 | 1 | 0.3 | Polyubiquitin |
| ORTHOMCL4517 | 1 | 0.3 | Apoptotic protease-activating factor 1 |
| ORTHOMCL349 | 1 | 0.3 | Mitogen-activated protein kinase hog1 |
| ORTHOMCL58 | 1 | 0.3 | Leucine-rich repeat-containing protein 15 |
| ORTHOMCL573 | 1 | 0.3 | Nitrate reductase [NADH] |
| ORTHOMCL2761 | 1 | 0.3 | Ankyrin repeat domain-containing protein 17 |
| ORTHOMCL844 | 1 | 0.3 | Modification methylase DsaV |
| ORTHOMCL480 | 1 | 0.3 | Putative mitochondrial ATP-dependent helicase irc3 |
| ORTHOMCL2776 | 1 | 0.3 | COBW domain-containing protein 1 |
| ORTHOMCL1931 | 1 | 0.3 | F-box protein At1g78280 |
| ORTHOMCL11186 | 1 | 0.3 | CUGBP Elav-like family member 6 |
| ORTHOMCL61 | 1 | 0.3 | Gag-Pol polyprotein |
| ORTHOMCL1165 | 1 | 0.3 | Ras-related protein Rab-34 |
| ORTHOMCL2928 | 1 | 0.3 | Extracellular signal-regulated kinase 2 |
| ORTHOMCL10875 | 1 | 0.3 | Peptidyl-prolyl cis-trans isomerase |
| ORTHOMCL7415 | 1 | 0.3 | Histone-lysine N-methyltransferase ASHR1 |
| ORTHOMCL6696 | 1 | 0.3 | 60S ribosomal protein L35 |
| ORTHOMCL233 | 1 | 0.3 | Cytosine-specific methyltransferase NlaX |
| ORTHOMCL156 | 1 | 0.3 | Processed variable antigen (Fragment) |
| ORTHOMCL684 | 1 | 0.3 | UPF0187 protein sll1024 |
| ORTHOMCL2351 | 1 | 0.3 | UPF0187 protein At3g61320, chloroplastic |
| ORTHOMCL465 | 1 | 0.3 | Sterol 24-C-methyltransferase |
| ORTHOMCL505 | 1 | 0.3 | ATP-citrate synthase |
| ORTHOMCL2308 | 1 | 0.3 | ADP-ribosylation factor |
| ORTHOMCL13396 | 1 | 0.3 | Fructose-bisphosphate aldolase |
| ORTHOMCL1015 | 1 | 0.3 | Protease Do-like 9 |
| ORTHOMCL12499 | 1 | 0.3 | G2/mitotic-specific cyclin-B |
| ORTHOMCL128 | 1 | 0.3 | Halomucin |
| ORTHOMCL15071 | 1 | 0.3 | Probable voltage-dependent N-type calcium channel subunit alpha-1B |
| ORTHOMCL630 | 1 | 0.3 | Insulin-like growth factor-binding protein complex acid labile subunit |
| ORTHOMCL13 | 1 | 0.3 | Serine/threonine-protein kinase TNNI3K |
| ORTHOMCL13144 | 1 | 0.3 | Ataxin-3 |
| ORTHOMCL265 | 1 | 0.3 | Protein WAX2 |
| ORTHOMCL4371 | 1 | 0.3 | Tubulin beta chain |
| ORTHOMCL642 | 1 | 0.3 | Arginine--tRNA ligase, cytoplasmic |
| ORTHOMCL648 | 1 | 0.3 | Tristetraprolin |
| ORTHOMCL3244 | 1 | 0.3 | Ethanolamine-phosphate cytidylyltransferase |
| ORTHOMCL1047 | 1 | 0.3 | Coiled-coil domain-containing protein 147 |
| ORTHOMCL3737 | 1 | 0.3 | Kinesin-II 85 kDa subunit |
| ORTHOMCL1227 | 1 | 0.3 | Cation/H(+) antiporter 16 |
| ORTHOMCL8091 | 1 | 0.3 | 40S ribosomal protein SA |
| ORTHOMCL374 | 1 | 0.3 | ATP-dependent zinc metalloprotease FtsH 3 |
| ORTHOMCL673 | 1 | 0.3 | Fucoxanthin-chlorophyll a-c binding protein A, chloroplastic |
| ORTHOMCL1705 | 1 | 0.3 | Eukaryotic translation initiation factor 4E |
| ORTHOMCL10 | 1 | 0.3 | Craniofacial development protein 2 |
| ORTHOMCL180 | 1 | 0.3 | Tubulin alpha chain |
| ORTHOMCL320 | 1 | 0.3 | Leucine-rich repeat protein SHOC-2 |
| ORTHOMCL1925 | 1 | 0.3 | Phosphoserine aminotransferase |
| ORTHOMCL84 | 1 | 0.3 | DNA repair and recombination protein pif1, mitochondrial |
| ORTHOMCL8212 | 1 | 0.3 | Granaticin polyketide synthase putative ketoacyl reductase 2 |
| ameasured as recycled copy number normalized to total copy number. | | | |

Table S3. Relative activities of *Symbiodinium* genes in the second bout.

| Family | Copy number of retrogenes | Relative activitya | Function description |
| --- | --- | --- | --- |
| ORTHOMCL22 | 13 | 3.01 | Retrovirus-related Pol polyprotein from transposon TNT 1-94 |
| ORTHOMCL25 | 12 | 2.79 | Transposon TX1 uncharacterized 149 kDa protein |
| ORTHOMCL2 | 11 | 2.56 | Retrovirus-related Pol polyprotein LINE-1 |
| ORTHOMCL41 | 11 | 2.56 | Probable E3 ubiquitin-protein ligase HERC2 |
| ORTHOMCL4 | 10 | 2.32 | Ankyrin-1 |
| ORTHOMCL35 | 9 | 2.09 | Putative ankyrin repeat protein MM 0045 |
| ORTHOMCL47 | 7 | 1.63 | UDP-N-acetylglucosamine--peptide N-acetylglucosaminyltransferase 110 kDa subunit |
| ORTHOMCL370 | 7 | 1.63 | Copia protein |
| ORTHOMCL31 | 6 | 1.39 | Probable E3 ubiquitin-protein ligase HERC6 |
| ORTHOMCL183 | 5 | 1.16 | Protein NLRC3 |
| ORTHOMCL146 | 4 | 0.93 | mRNA export factor elf1 |
| ORTHOMCL57 | 4 | 0.93 | Fucoxanthin-chlorophyll a-c binding protein F, chloroplastic (Fragment) |
| ORTHOMCL505 | 4 | 0.93 | ATP-citrate synthase |
| ORTHOMCL111 | 4 | 0.93 | Polycystic kidney disease protein 1-like 3 |
| ORTHOMCL145 | 3 | 0.7 | BTB/POZ and TAZ domain-containing protein 2 |
| ORTHOMCL1 | 3 | 0.7 | Glucose-dependent insulinotropic receptor |
| ORTHOMCL171 | 3 | 0.7 | Zonadhesin |
| ORTHOMCL512 | 3 | 0.7 | Probable peptide/nitrate transporter At1g62200 |
| ORTHOMCL12 | 3 | 0.7 | Putative F-box and FNIP repeat-containing protein L60 |
| ORTHOMCL212 | 3 | 0.7 | Bifunctional protein FolD |
| ORTHOMCL13 | 3 | 0.7 | Serine/threonine-protein kinase TNNI3K |
| ORTHOMCL708 | 3 | 0.7 | Adenosylhomocysteinase |
| ORTHOMCL2201 | 2 | 0.47 | IgA FC receptor |
| ORTHOMCL152 | 2 | 0.47 | Ammonium transporter 1 member 2 |
| ORTHOMCL14 | 2 | 0.47 | DNA (cytosine-5)-methyltransferase 3B |
| ORTHOMCL351 | 2 | 0.47 | LRR receptor-like serine/threonine-protein kinase GSO2 |
| ORTHOMCL89 | 2 | 0.47 | ATP-dependent DNA helicase PIF1 |
| ORTHOMCL119 | 2 | 0.47 | Aldose 1-epimerase |
| ORTHOMCL581 | 2 | 0.47 | Cyclomaltodextrin glucanotransferase |
| ORTHOMCL490 | 2 | 0.47 | Uncharacterized RNA pseudouridine synthase HP 0347 |
| ORTHOMCL101 | 2 | 0.47 | ATP-dependent RNA helicase ddx19 |
| ORTHOMCL342 | 2 | 0.47 | Dolichol kinase |
| ORTHOMCL379 | 2 | 0.47 | Leishmanolysin homolog |
| ORTHOMCL17 | 2 | 0.47 | Putative transposon Ty5-1 protein YCL074W |
| ORTHOMCL64 | 2 | 0.47 | Modification methylase NaeI |
| ORTHOMCL9014 | 2 | 0.47 | DnaJ protein homolog |
| ORTHOMCL94 | 2 | 0.47 | E3 ubiquitin-protein ligase HERC2 |
| ORTHOMCL238 | 2 | 0.47 | Palmitoyltransferase AKR1 |
| ORTHOMCL2761 | 2 | 0.47 | Ankyrin repeat domain-containing protein 17 |
| ORTHOMCL317 | 2 | 0.47 | Insulin-degrading enzyme |
| ORTHOMCL263 | 2 | 0.47 | Non-specific lipid-transfer protein (Fragment) |
| ORTHOMCL465 | 2 | 0.47 | Sterol 24-C-methyltransferase |
| ORTHOMCL24 | 2 | 0.47 | Halomucin |
| ORTHOMCL2075 | 2 | 0.47 | Reticulocyte-binding protein 2 homolog a |
| ORTHOMCL648 | 2 | 0.47 | Tristetraprolin |
| ORTHOMCL98 | 2 | 0.47 | Uncharacterized RING finger protein ECU07 0330 |
| ORTHOMCL46 | 2 | 0.47 | Probable RNA 2'-phosphotransferase |
| ORTHOMCL369 | 2 | 0.47 | Beta-hexosaminidase |
| ORTHOMCL49 | 2 | 0.47 | Transposon Ty4-J Gag-Pol polyprotein |
| ORTHOMCL553 | 1 | 0.23 | Poly [ADP-ribose] polymerase 14 |
| ORTHOMCL9027 | 1 | 0.23 | Tartrate-resistant acid phosphatase type 5 |
| ORTHOMCL55 | 1 | 0.23 | Sodium/hydrogen exchanger 7 |
| ORTHOMCL3650 | 1 | 0.23 | Calpain-3 |
| ORTHOMCL1238 | 1 | 0.23 | Kinase D-interacting substrate of 220 kDa |
| ORTHOMCL11713 | 1 | 0.23 | Modification methylase HaeII |
| ORTHOMCL692 | 1 | 0.23 | Putative uncharacterized protein DDB G0291608 |
| ORTHOMCL1219 | 1 | 0.23 | UDP-galactose translocator 1 |
| ORTHOMCL618 | 1 | 0.23 | MND1-interacting protein 1 |
| ORTHOMCL11419 | 1 | 0.23 | Ubiquitin-conjugating enzyme E2 2 |
| ORTHOMCL362 | 1 | 0.23 | Mitochondrial cardiolipin hydrolase |
| ORTHOMCL2162 | 1 | 0.23 | Protein PF14 0175 |
| ORTHOMCL936 | 1 | 0.23 | 6-hydroxynicotinate 3-monooxygenase |
| ORTHOMCL1383 | 1 | 0.23 | Cytochrome c |
| ORTHOMCL315 | 1 | 0.23 | Glyceraldehyde-3-phosphate dehydrogenase, chloroplastic |
| ORTHOMCL5556 | 1 | 0.23 | Mitochondria fission 1 protein |
| ORTHOMCL2273 | 1 | 0.23 | Cold shock protein CspA |
| ORTHOMCL1903 | 1 | 0.23 | Beta-glucanase |
| ORTHOMCL4372 | 1 | 0.23 | DNA-binding protein HEXBP |
| ORTHOMCL8786 | 1 | 0.23 | Signal peptide, CUB and EGF-like domain-containing protein 2 |
| ORTHOMCL1018 | 1 | 0.23 | ATP synthase subunit C, plastid |
| ORTHOMCL82 | 1 | 0.23 | Probable RNA-directed DNA polymerase from transposon X-element |
| ORTHOMCL1398 | 1 | 0.23 | Photosystem II reaction center protein L |
| ORTHOMCL802 | 1 | 0.23 | Serine/arginine-rich splicing factor 9 |
| ORTHOMCL33 | 1 | 0.23 | Sushi, von Willebrand factor type A, EGF and pentraxin domain-containing protein 1 |
| ORTHOMCL118 | 1 | 0.23 | Leucine-rich repeat-containing protein 26 |
| ORTHOMCL869 | 1 | 0.23 | ADP-ribosylation factor 1 |
| ORTHOMCL220 | 1 | 0.23 | Ribosomal RNA large subunit methyltransferase N |
| ORTHOMCL451 | 1 | 0.23 | Leucine-rich repeat-containing protein LOC400891 homolog |
| ORTHOMCL182 | 1 | 0.23 | Long chain acyl-CoA synthetase 9, chloroplastic |
| ORTHOMCL6699 | 1 | 0.23 | Photosystem II 12 kDa extrinsic protein, chloroplastic |
| ORTHOMCL1085 | 1 | 0.23 | Cadmium/zinc-transporting ATPase 3 |
| ORTHOMCL1407 | 1 | 0.23 | Zinc finger protein 471 |
| ORTHOMCL623 | 1 | 0.23 | Probable E3 ubiquitin-protein ligase HERC4 |
| ORTHOMCL4554 | 1 | 0.23 | Formin-like protein 3 |
| ORTHOMCL1395 | 1 | 0.23 | Ankyrin repeat and KH domain-containing protein mask |
| ORTHOMCL268 | 1 | 0.23 | Endoplasmic reticulum mannosyl-oligosaccharide 1,2-alpha-mannosidase |
| ORTHOMCL6 | 1 | 0.23 | DNA (cytosine-5)-methyltransferase 3A |
| ORTHOMCL1731 | 1 | 0.23 | Carboxymethylenebutenolidase homolog |
| ORTHOMCL1706 | 1 | 0.23 | DNA-directed RNA polymerase III subunit RPC10 |
| ORTHOMCL200 | 1 | 0.23 | IgA-specific serine endopeptidase autotransporter |
| ORTHOMCL428 | 1 | 0.23 | UPF0617 protein C1919.13c |
| ORTHOMCL4173 | 1 | 0.23 | 60S ribosomal protein L11 |
| ORTHOMCL4720 | 1 | 0.23 | Gag polyprotein |
| ORTHOMCL625 | 1 | 0.23 | UDP-sugar pyrophosphorylase |
| ORTHOMCL1382 | 1 | 0.23 | Glyceraldehyde-3-phosphate dehydrogenase, glycosomal |
| ORTHOMCL675 | 1 | 0.23 | Alpha-protein kinase vwkA |
| ORTHOMCL214 | 1 | 0.23 | Cytochrome b-c1 complex subunit Rieske-3, mitochondrial |
| ORTHOMCL16 | 1 | 0.23 | Putative surface protein bspA-like |
| ORTHOMCL0 | 1 | 0.23 | Modification methylase Eco47II |
| ORTHOMCL14834 | 1 | 0.23 | Sodium- and chloride-dependent betaine transporter |
| ORTHOMCL3048 | 1 | 0.23 | Sodium/potassium/calcium exchanger 6 |
| ORTHOMCL373 | 1 | 0.23 | Peptidyl-prolyl cis-trans isomerase ESS1 |
| ORTHOMCL1057 | 1 | 0.23 | Elongation factor Tu |
| ORTHOMCL691 | 1 | 0.23 | Bis(5'-nucleosyl)-tetraphosphatase prpE [asymmetrical] |
| ORTHOMCL105 | 1 | 0.23 | Spondin-1 |
| ORTHOMCL14800 | 1 | 0.23 | Lipase maturation factor 2 |
| ORTHOMCL328 | 1 | 0.23 | Chitin biosynthesis protein CHS5 |
| ORTHOMCL134 | 1 | 0.23 | Modification methylase BsuFI |
| ORTHOMCL11 | 1 | 0.23 | Sodium/calcium exchanger 2 |
| ORTHOMCL616 | 1 | 0.23 | Kinesin-like protein KIF9 |
| ORTHOMCL135 | 1 | 0.23 | Probable outer membrane protein pmpB |
| ORTHOMCL122 | 1 | 0.23 | Multidrug resistance protein 1 |
| ORTHOMCL225 | 1 | 0.23 | Glutamine-rich protein 2 |
| ORTHOMCL3 | 1 | 0.23 | Retrovirus-related Pol polyprotein from type-2 retrotransposable element R2DM |
| ORTHOMCL18 | 1 | 0.23 | Ankyrin repeat domain-containing protein 50 |
| ORTHOMCL4241 | 1 | 0.23 | 40S ribosomal protein S6 |
| ORTHOMCL1843 | 1 | 0.23 | Ankyrin-3 |
| ORTHOMCL3876 | 1 | 0.23 | Probable zinc protease pqqL |
| ORTHOMCL1923 | 1 | 0.23 | Tetracycline resistance protein, class H |
| ORTHOMCL331 | 1 | 0.23 | Ferredoxin |
| ORTHOMCL343 | 1 | 0.23 | Sodium-dependent phosphate transport protein 2B |
| ORTHOMCL893 | 1 | 0.23 | Probable sugar phosphate/phosphate translocator At4g32390 |
| ORTHOMCL126 | 1 | 0.23 | WD repeat-containing protein 46 |
| ORTHOMCL609 | 1 | 0.23 | Kinesin light chain 1 |
| ORTHOMCL973 | 1 | 0.23 | 1,3-beta-glucan synthase component FKS1 |
| ORTHOMCL114 | 1 | 0.23 | Putative ankyrin repeat protein L88 |
| ORTHOMCL203 | 1 | 0.23 | Baculoviral IAP repeat-containing protein 3 |
| ORTHOMCL1846 | 1 | 0.23 | Ankyrin-2 |
| ORTHOMCL1876 | 1 | 0.23 | Putative pyridoxal phosphate-dependent aminotransferase epsN |
| ORTHOMCL1982 | 1 | 0.23 | Ferredoxin--NADP reductase, cyanelle |
| ORTHOMCL3332 | 1 | 0.23 | Abhydrolase domain-containing protein FAM108C1 |
| ORTHOMCL2904 | 1 | 0.23 | RCC1 repeat-containing protein C10F6.04 |
| ORTHOMCL221 | 1 | 0.23 | Probable RNA-directed DNA polymerase from transposon BS |
| ORTHOMCL480 | 1 | 0.23 | Putative mitochondrial ATP-dependent helicase irc3 |
| ORTHOMCL69 | 1 | 0.23 | Exoglucanase |
| ORTHOMCL714 | 1 | 0.23 | E3 ubiquitin-protein ligase RNF213 |
| ORTHOMCL6417 | 1 | 0.23 | Protein Rf1, mitochondrial |
| ORTHOMCL196 | 1 | 0.23 | Heat shock 70 kDa protein |
| ORTHOMCL2117 | 1 | 0.23 | Endoplasmin homolog |
| ORTHOMCL137 | 1 | 0.23 | cGMP-dependent protein kinase 1 |
| ORTHOMCL2623 | 1 | 0.23 | Oxygen-evolving enhancer protein 1, chloroplastic |
| ORTHOMCL686 | 1 | 0.23 | Cyclin-dependent kinase G-2 |
| ORTHOMCL7213 | 1 | 0.23 | Neurocalcin-delta B |
| ORTHOMCL14406 | 1 | 0.23 | Minor allergen Alt a 7 |
| ORTHOMCL1140 | 1 | 0.23 | RNA polymerase II-associated protein 3 |
| ORTHOMCL398 | 1 | 0.23 | Unconventional myosin-VI |
| ORTHOMCL704 | 1 | 0.23 | Ammonia channel |
| ORTHOMCL840 | 1 | 0.23 | FK506-binding protein 1 |
| ORTHOMCL156 | 1 | 0.23 | Processed variable antigen (Fragment) |
| ORTHOMCL252 | 1 | 0.23 | Leucine-zipper-like transcriptional regulator 1 |
| ORTHOMCL121 | 1 | 0.23 | Pentatricopeptide repeat-containing protein At2g31400, chloroplastic |
| ORTHOMCL447 | 1 | 0.23 | Argininosuccinate lyase 2 |
| ORTHOMCL1280 | 1 | 0.23 | ATP-dependent RNA helicase glh-4 |
| ORTHOMCL767 | 1 | 0.23 | Uncharacterized oxidoreductase At4g09670 |
| ORTHOMCL436 | 1 | 0.23 | Dimethylaniline monooxygenase [N-oxide-forming] 5 |
| ORTHOMCL3431 | 1 | 0.23 | Retrotransposon-like protein 1 |
| ORTHOMCL104 | 1 | 0.23 | Interferon-induced GTP-binding protein Mx1 |
| ORTHOMCL356 | 1 | 0.23 | Calcium-dependent protein kinase 1 |
| ORTHOMCL2290 | 1 | 0.23 | Uncharacterized oxidoreductase C736.13 |
| ORTHOMCL208 | 1 | 0.23 | Uncharacterized protein 075L |
| ORTHOMCL2159 | 1 | 0.23 | Superoxide dismutase [Mn] |
| ORTHOMCL1019 | 1 | 0.23 | Exoglucanase-6A |
| ORTHOMCL3370 | 1 | 0.23 | Inositol oxygenase |
| ORTHOMCL27 | 1 | 0.23 | Saposin-like protein 11 |
| ORTHOMCL981 | 1 | 0.23 | Serine/threonine kinase SAD-1 |
| ORTHOMCL1258 | 1 | 0.23 | Uncharacterized ATP-binding protein PYRAB09480 |
| ORTHOMCL3023 | 1 | 0.23 | FAD-dependent oxidoreductase domain-containing protein 2 |
| ORTHOMCL1745 | 1 | 0.23 | UDP-glucose 6-dehydrogenase |
| ORTHOMCL4527 | 1 | 0.23 | DNA (cytosine-5)-methyltransferase DRM1 |
| ORTHOMCL15297 | 1 | 0.23 | Peptide transporter PTR5 |
| ORTHOMCL80 | 1 | 0.23 | Modification methylase NgoBI |
| ORTHOMCL865 | 1 | 0.23 | Probable nucleoredoxin 1 |
| ORTHOMCL476 | 1 | 0.23 | RING finger protein B |
| ORTHOMCL9767 | 1 | 0.23 | Major basic nuclear protein 2 |
| ORTHOMCL851 | 1 | 0.23 | Cytochrome c6 |
| ORTHOMCL1425 | 1 | 0.23 | Cortactin-binding protein 2 |
| ORTHOMCL108 | 1 | 0.23 | Retrovirus-related Pol polyprotein from transposon 17.6 |
| ORTHOMCL42 | 1 | 0.23 | Glutamine synthetase |
| ORTHOMCL1442 | 1 | 0.23 | Probable flavin-containing monooxygenase 1 |
| ORTHOMCL172 | 1 | 0.23 | Oxysterol-binding protein-related protein 10 |

ameasured as recycled copy number normalized to total copy number.

Table S4. Enriched GO terms of Symbiodinium genes that are active in the 1st or 2nd bout.

| GO ID | GO term | GO classa | P-value of enrichment in bout 1 | P-value of enrichment in bout 2 |
| --- | --- | --- | --- | --- |
| GO:0006412 | translation | BP | 4.78E-09 | 0.008293911 |
| GO:0006278 | RNA-dependent DNA replication | BP | 3.27E-06 | 0.02435476 |
| GO:0009186 | deoxyribonucleoside diphosphate metabolic process | BP | 0.000245747 | 0.001212563 |
| GO:0006605 | protein targeting | BP | 0.001206854 | 0.004852362 |
| GO:0006388 | tRNA splicing, via endonucleolytic cleavage and ligation | BP | 0.002674125 | 0.02229328 |
| GO:0006807 | nitrogen compound metabolic process | BP | 0.004580926 | 0.002238449 |
| GO:0045454 | cell redox homeostasis | BP | 0.01809812 | 0.02428345 |
| GO:0015986 | ATP synthesis coupled proton transport | BP | 0.02156004 | 0.002955104 |
| GO:0015991 | ATP hydrolysis coupled proton transport | BP | 0.02492947 | 0.004937732 |
| GO:0055114 | oxidation-reduction process | BP | 0.02745403 | 0.002979179 |
| GO:0006260 | DNA replication | BP | 0.03401686 | 0.04696416 |
| GO:0006306 | DNA methylation | BP | 1.67E-12 | 0.3129602 |
| GO:0006811 | ion transport | BP | 3.78E-07 | 1 |
| GO:0042823 | pyridoxal phosphate biosynthetic process | BP | 1.08E-05 | 1 |
| GO:0006430 | lysyl-tRNA aminoacylation | BP | 8.24E-05 | 1 |
| GO:0055085 | transmembrane transport | BP | 0.000131206 | 0.2408688 |
| GO:0006555 | methionine metabolic process | BP | 0.000245747 | 1 |
| GO:0015031 | protein transport | BP | 0.000356786 | 0.278546 |
| GO:0006979 | response to oxidative stress | BP | 0.00075227 | 1 |
| GO:0006544 | glycine metabolic process | BP | 0.0008094 | 1 |
| GO:0006563 | L-serine metabolic process | BP | 0.0008094 | 1 |
| GO:0006750 | glutathione biosynthetic process | BP | 0.001206854 | 1 |
| GO:0006094 | gluconeogenesis | BP | 0.001206854 | 1 |
| GO:0006108 | malate metabolic process | BP | 0.001206854 | 1 |
| GO:0006420 | arginyl-tRNA aminoacylation | BP | 0.001679521 | 1 |
| GO:0006812 | cation transport | BP | 0.00203247 | 1 |
| GO:0006662 | glycerol ether metabolic process | BP | 0.002226018 | 1 |
| GO:0006820 | anion transport | BP | 0.002844981 | 1 |
| GO:0007264 | small GTPase mediated signal transduction | BP | 0.003236984 | 0.3037375 |
| GO:0009396 | folic acid-containing compound biosynthetic process | BP | 0.003535065 | 1 |
| GO:0008652 | cellular amino acid biosynthetic process | BP | 0.003535065 | 1 |
| GO:0006541 | glutamine metabolic process | BP | 0.003535065 | 1 |
| GO:0006457 | protein folding | BP | 0.005883163 | 0.6925152 |
| GO:0006754 | ATP biosynthetic process | BP | 0.007455941 | 1 |
| GO:0008643 | carbohydrate transport | BP | 0.008999075 | 1 |
| GO:0006950 | response to stress | BP | 0.009096058 | 0.06125622 |
| GO:0019538 | protein metabolic process | BP | 0.01024783 | 1 |
| GO:0006814 | sodium ion transport | BP | 0.0114606 | 1 |
| GO:0006886 | intracellular protein transport | BP | 0.01600822 | 0.3941033 |
| GO:0006413 | translational initiation | BP | 0.01839834 | 1 |
| GO:0006813 | potassium ion transport | BP | 0.02964198 | 1 |
| GO:0006511 | ubiquitin-dependent protein catabolic process | BP | 0.04606938 | 0.5219248 |
| GO:0007017 | microtubule-based process | BP | 0.09236591 | 0.007249845 |
| GO:0051258 | protein polymerization | BP | 0.09800787 | 0.007988581 |
| GO:0006355 | regulation of transcription, DNA-dependent | BP | 0.2955796 | 0.000646972 |
| GO:0015074 | DNA integration | BP | 0.3739951 | 0.000140796 |
| GO:0006810 | transport | BP | 0.7540245 | 0.01820327 |
| GO:0006542 | glutamine biosynthetic process | BP | 1 | 1.36E-06 |
| GO:0006836 | neurotransmitter transport | BP | 1 | 4.95E-05 |
| GO:0019310 | inositol catabolic process | BP | 1 | 0.000109899 |
| GO:0006183 | GTP biosynthetic process | BP | 1 | 0.000147841 |
| GO:0006228 | UTP biosynthetic process | BP | 1 | 0.000147841 |
| GO:0006241 | CTP biosynthetic process | BP | 1 | 0.000147841 |
| GO:0015979 | photosynthesis | BP | 1 | 0.000194814 |
| GO:0016310 | phosphorylation | BP | 1 | 0.000302507 |
| GO:0050821 | protein stabilization | BP | 1 | 0.000488264 |
| GO:0007585 | respiratory gaseous exchange | BP | 1 | 0.000507592 |
| GO:0018298 | protein-chromophore linkage | BP | 1 | 0.000729019 |
| GO:0042549 | photosystem II stabilization | BP | 1 | 0.001015923 |
| GO:0007155 | cell adhesion | BP | 1 | 0.001212563 |
| GO:0009166 | nucleotide catabolic process | BP | 1 | 0.001348324 |
| GO:0044262 | cellular carbohydrate metabolic process | BP | 1 | 0.001639595 |
| GO:0006333 | chromatin assembly or disassembly | BP | 1 | 0.001725579 |
| GO:0045087 | innate immune response | BP | 1 | 0.002955377 |
| GO:0016998 | cell wall macromolecule catabolic process | BP | 1 | 0.002955377 |
| GO:0006414 | translational elongation | BP | 1 | 0.004262549 |
| GO:0006801 | superoxide metabolic process | BP | 1 | 0.004852362 |
| GO:0006621 | protein retention in ER lumen | BP | 1 | 0.004895755 |
| GO:0006487 | protein N-linked glycosylation | BP | 1 | 0.007170478 |
| GO:0015977 | carbon fixation | BP | 1 | 0.009889901 |
| GO:0007049 | cell cycle | BP | 1 | 0.01299148 |
| GO:0006955 | immune response | BP | 1 | 0.01645672 |
| GO:0006486 | protein glycosylation | BP | 1 | 0.02397971 |
| GO:0006075 | 1,3-beta-D-glucan biosynthetic process | BP | 1 | 0.02440735 |
| GO:0006289 | nucleotide-excision repair | BP | 1 | 0.02440735 |
| GO:0001932 | regulation of protein phosphorylation | BP | 1 | 0.02885885 |
| GO:0016567 | protein ubiquitination | BP | 1 | 0.03863383 |
| GO:0006471 | protein ADP-ribosylation | BP | 1 | 0.04947078 |
| GO:0006730 | one-carbon metabolic process | BP | 1 | 0.04947078 |
| GO:0006633 | fatty acid biosynthetic process | BP | 1 | 0.04947078 |
| GO:0006418 | tRNA aminoacylation for protein translation | BP | 0.0708582 | 1 |
| GO:0007018 | microtubule-based movement | BP | 0.08492307 | 0.1382623 |
| GO:0006096 | glycolysis | BP | 0.08682432 | 1 |
| GO:0016192 | vesicle-mediated transport | BP | 0.08682432 | 1 |
| GO:0006281 | DNA repair | BP | 0.1151512 | 0.3617454 |
| GO:0006468 | protein phosphorylation | BP | 0.1749041 | 0.8704963 |
| GO:0006310 | DNA recombination | BP | 0.1761698 | 0.6113391 |
| GO:0007165 | signal transduction | BP | 0.2213317 | 0.1866446 |
| GO:0005975 | carbohydrate metabolic process | BP | 0.4620798 | 0.584461 |
| GO:0008152 | metabolic process | BP | 0.5600234 | 0.157224 |
| GO:0006508 | proteolysis | BP | 0.8885495 | 0.3603933 |
| GO:0009058 | biosynthetic process | BP | 1 | 0.2336986 |
| GO:0016311 | dephosphorylation | BP | 1 | 0.2701307 |
| GO:0005840 | ribosome | CC | 5.41E-09 | 0.000638556 |
| GO:0042651 | thylakoid membrane | CC | 0.000319732 | 0.001500042 |
| GO:0005971 | ribonucleoside-diphosphate reductase complex | CC | 0.002226018 | 0.001348324 |
| GO:0005622 | intracellular | CC | 0.004480356 | 0.003212934 |
| GO:0033177 | proton-transporting two-sector ATPase complex, proton-transporting domain | CC | 0.008006489 | 0.000923332 |
| GO:0016020 | membrane | CC | 0.00055638 | 0.4315669 |
| GO:0033179 | proton-transporting V-type ATPase, V0 domain | CC | 0.001206854 | 1 |
| GO:0005886 | plasma membrane | CC | 0.001679521 | 1 |
| GO:0045261 | proton-transporting ATP synthase complex, catalytic core F(1) | CC | 0.005123308 | 1 |
| GO:0000139 | Golgi membrane | CC | 0.01170734 | 1 |
| GO:0008076 | voltage-gated potassium channel complex | CC | 0.01634826 | 1 |
| GO:0030286 | dynein complex | CC | 0.01839834 | 1 |
| GO:0005737 | cytoplasm | CC | 0.03234836 | 0.4830975 |
| GO:0043234 | protein complex | CC | 0.09800787 | 0.007988581 |
| GO:0005874 | microtubule | CC | 0.1037448 | 0.008770156 |
| GO:0005887 | integral to plasma membrane | CC | 1 | 4.95E-05 |
| GO:0045263 | proton-transporting ATP synthase complex, coupling factor F(o) | CC | 1 | 0.000284298 |
| GO:0005850 | eukaryotic translation initiation factor 2 complex | CC | 1 | 0.000507592 |
| GO:0030076 | light-harvesting complex | CC | 1 | 0.000729019 |
| GO:0031361 | integral to thylakoid membrane | CC | 1 | 0.001015923 |
| GO:0000785 | chromatin | CC | 1 | 0.001348324 |
| GO:0019898 | extrinsic to membrane | CC | 1 | 0.001725579 |
| GO:0009654 | oxygen evolving complex | CC | 1 | 0.001725579 |
| GO:0009538 | photosystem I reaction center | CC | 1 | 0.002147048 |
| GO:0005740 | mitochondrial envelope | CC | 1 | 0.002955377 |
| GO:0009522 | photosystem I | CC | 1 | 0.002955377 |
| GO:0031224 | intrinsic to membrane | CC | 1 | 0.002955377 |
| GO:0009523 | photosystem II | CC | 1 | 0.003120114 |
| GO:0009507 | chloroplast | CC | 1 | 0.007036155 |
| GO:0005871 | kinesin complex | CC | 1 | 0.007215694 |
| GO:0009536 | plastid | CC | 1 | 0.01299148 |
| GO:0005743 | mitochondrial inner membrane | CC | 1 | 0.02026776 |
| GO:0000151 | ubiquitin ligase complex | CC | 1 | 0.02440735 |
| GO:0000148 | 1,3-beta-D-glucan synthase complex | CC | 1 | 0.02440735 |
| GO:0005952 | cAMP-dependent protein kinase complex | CC | 1 | 0.02885885 |
| GO:0005634 | nucleus | CC | 0.1441686 | 0.2710685 |
| GO:0016021 | integral to membrane | CC | 0.348644 | 0.5149942 |
| GO:0003735 | structural constituent of ribosome | MF | 5.76E-09 | 0.000657139 |
| GO:0003677 | DNA binding | MF | 6.93E-09 | 0.001867673 |
| GO:0003964 | RNA-directed DNA polymerase activity | MF | 3.37E-06 | 0.02435476 |
| GO:0004523 | ribonuclease H activity | MF | 5.73E-05 | 0.03366122 |
| GO:0004748 | ribonucleoside-diphosphate reductase activity | MF | 0.000115611 | 0.00134551 |
| GO:0009496 | plastoquinol-plastocyanin reductase activity | MF | 0.000319732 | 0.001500042 |
| GO:0004707 | MAP kinase activity | MF | 0.001206854 | 0.000729019 |
| GO:0004784 | superoxide dismutase activity | MF | 0.002844981 | 0.007170478 |
| GO:0008121 | ubiquinol-cytochrome-c reductase activity | MF | 0.002884102 | 0.001725579 |
| GO:0016874 | ligase activity | MF | 0.004294943 | 0.03360618 |
| GO:0003676 | nucleic acid binding | MF | 0.0045241 | 0.004139948 |
| GO:0004356 | glutamate-ammonia ligase activity | MF | 0.006018866 | 9.32E-05 |
| GO:0003725 | double-stranded RNA binding | MF | 0.009096058 | 0.000179643 |
| GO:0020037 | heme binding | MF | 0.01301864 | 0.02319486 |
| GO:0015078 | hydrogen ion transmembrane transporter activity | MF | 0.01545308 | 0.002206579 |
| GO:0010181 | FMN binding | MF | 0.01634826 | 0.000988204 |
| GO:0016772 | transferase activity, transferring phosphorus-containing groups | MF | 0.01762311 | 0.001175722 |
| GO:0051287 | NAD or NADH binding | MF | 0.01995269 | 0.002206579 |
| GO:0003743 | translation initiation factor activity | MF | 0.02156004 | 0.04947078 |
| GO:0016616 | oxidoreductase activity, acting on the CH-OH group of donors, NAD or NADP as acceptor | MF | 0.02668943 | 0.002955104 |
| GO:0004518 | nuclease activity | MF | 0.03401686 | 0.02456199 |
| GO:0015035 | protein disulfide oxidoreductase activity | MF | 0.03420698 | 0.02885885 |
| GO:0051537 | 2 iron, 2 sulfur cluster binding | MF | 0.03629288 | 0.01336087 |
| GO:0005216 | ion channel activity | MF | 3.09E-07 | 1 |
| GO:0003755 | peptidyl-prolyl cis-trans isomerase activity | MF | 1.99E-06 | 1 |
| GO:0019843 | rRNA binding | MF | 4.00E-05 | 1 |
| GO:0004824 | lysine-tRNA ligase activity | MF | 8.24E-05 | 1 |
| GO:0004357 | glutamate-cysteine ligase activity | MF | 0.000245747 | 1 |
| GO:0004470 | malic enzyme activity | MF | 0.000245747 | 1 |
| GO:0004489 | methylenetetrahydrofolate reductase (NADPH) activity | MF | 0.000245747 | 1 |
| GO:0004612 | phosphoenolpyruvate carboxykinase (ATP) activity | MF | 0.000245747 | 1 |
| GO:0003723 | RNA binding | MF | 0.000260432 | 0.304239 |
| GO:0008097 | 5S rRNA binding | MF | 0.000319732 | 1 |
| GO:0016209 | antioxidant activity | MF | 0.000457772 | 1 |
| GO:0004601 | peroxidase activity | MF | 0.000545681 | 1 |
| GO:0015450 | P-P-bond-hydrolysis-driven protein transmembrane transporter activity | MF | 0.0008094 | 1 |
| GO:0008508 | bile acid:sodium symporter activity | MF | 0.0008094 | 1 |
| GO:0004372 | glycine hydroxymethyltransferase activity | MF | 0.0008094 | 1 |
| GO:0043565 | sequence-specific DNA binding | MF | 0.0008094 | 1 |
| GO:0015299 | solute:hydrogen antiporter activity | MF | 0.000871831 | 1 |
| GO:0004075 | biotin carboxylase activity | MF | 0.001206854 | 1 |
| GO:0004086 | carbamoyl-phosphate synthase activity | MF | 0.001679521 | 1 |
| GO:0004721 | phosphoprotein phosphatase activity | MF | 0.001679521 | 1 |
| GO:0004814 | arginine-tRNA ligase activity | MF | 0.001679521 | 1 |
| GO:0016671 | oxidoreductase activity, acting on a sulfur group of donors, disulfide as acceptor | MF | 0.002226018 | 1 |
| GO:0004743 | pyruvate kinase activity | MF | 0.002844981 | 1 |
| GO:0016597 | amino acid binding | MF | 0.002844981 | 1 |
| GO:0030955 | potassium ion binding | MF | 0.002844981 | 1 |
| GO:0016151 | nickel ion binding | MF | 0.002844981 | 1 |
| GO:0004807 | triose-phosphate isomerase activity | MF | 0.002884102 | 1 |
| GO:0015662 | ATPase activity, coupled to transmembrane movement of ions, phosphorylative mechanism | MF | 0.005710702 | 1 |
| GO:0005524 | ATP binding | MF | 0.00604103 | 0.9006374 |
| GO:0016820 | hydrolase activity, acting on acid anhydrides, catalyzing transmembrane movement of substances | MF | 0.006121045 | 1 |
| GO:0005351 | sugar:hydrogen symporter activity | MF | 0.008999075 | 1 |
| GO:0016810 | hydrolase activity, acting on carbon-nitrogen (but not peptide) bonds | MF | 0.009096058 | 1 |
| GO:0046933 | hydrogen ion transporting ATP synthase activity, rotational mechanism | MF | 0.0114606 | 1 |
| GO:0008081 | phosphoric diester hydrolase activity | MF | 0.0168981 | 1 |
| GO:0005249 | voltage-gated potassium channel activity | MF | 0.02164252 | 1 |
| GO:0016747 | transferase activity, transferring acyl groups other than amino-acyl groups | MF | 0.02599286 | 0.08777484 |
| GO:0004114 | 3',5'-cyclic-nucleotide phosphodiesterase activity | MF | 0.02668943 | 1 |
| GO:0008026 | ATP-dependent helicase activity | MF | 0.03741982 | 0.07071386 |
| GO:0005525 | GTP binding | MF | 0.0468661 | 0.1444605 |
| GO:0008080 | N-acetyltransferase activity | MF | 0.05376222 | 9.16E-05 |
| GO:0016757 | transferase activity, transferring glycosyl groups | MF | 0.0708582 | 0.04525105 |
| GO:0008234 | cysteine-type peptidase activity | MF | 0.1095715 | 0.009595088 |
| GO:0005198 | structural molecule activity | MF | 0.1184687 | 0.01091479 |
| GO:0008270 | zinc ion binding | MF | 0.1229583 | 0.008522547 |
| GO:0009055 | electron carrier activity | MF | 0.177062 | 0.002432978 |
| GO:0005215 | transporter activity | MF | 0.4635385 | 0.03305189 |
| GO:0005506 | iron ion binding | MF | 0.4814915 | 0.008390256 |
| GO:0005515 | protein binding | MF | 0.9985816 | 7.76E-06 |
| GO:0016903 | oxidoreductase activity, acting on the aldehyde or oxo group of donors | MF | 1 | 3.39E-06 |
| GO:0030151 | molybdenum ion binding | MF | 1 | 1.65E-05 |
| GO:0003700 | sequence-specific DNA binding transcription factor activity | MF | 1 | 3.82E-05 |
| GO:0005328 | neurotransmitter:sodium symporter activity | MF | 1 | 4.95E-05 |
| GO:0030976 | thiamine pyrophosphate binding | MF | 1 | 9.32E-05 |
| GO:0050113 | inositol oxygenase activity | MF | 1 | 0.000109899 |
| GO:0003968 | RNA-directed RNA polymerase activity | MF | 1 | 0.000147841 |
| GO:0004550 | nucleoside diphosphate kinase activity | MF | 1 | 0.000147841 |
| GO:0003950 | NAD+ ADP-ribosyltransferase activity | MF | 1 | 0.000393842 |
| GO:0042301 | phosphate binding | MF | 1 | 0.000488264 |
| GO:0004499 | flavin-containing monooxygenase activity | MF | 1 | 0.000585162 |
| GO:0003682 | chromatin binding | MF | 1 | 0.001348324 |
| GO:0046912 | transferase activity, transferring acyl groups, acyl groups converted into alkyl on transfer | MF | 1 | 0.002149874 |
| GO:0016301 | kinase activity | MF | 1 | 0.002206579 |
| GO:0008378 | galactosyltransferase activity | MF | 1 | 0.002612102 |
| GO:0051536 | iron-sulfur cluster binding | MF | 1 | 0.002803087 |
| GO:0003830 | beta-1,4-mannosylglycoprotein 4-beta-N-acetylglucosaminyltransferase activity | MF | 1 | 0.002955377 |
| GO:0004888 | transmembrane receptor activity | MF | 1 | 0.002955377 |
| GO:0016984 | ribulose-bisphosphate carboxylase activity | MF | 1 | 0.002955377 |
| GO:0033903 | endo-1,3(4)-beta-glucanase activity | MF | 1 | 0.002955377 |
| GO:0050661 | NADP or NADPH binding | MF | 1 | 0.003440261 |
| GO:0016538 | cyclin-dependent protein kinase regulator activity | MF | 1 | 0.004852362 |
| GO:0008134 | transcription factor binding | MF | 1 | 0.004852362 |
| GO:0046923 | ER retention sequence binding | MF | 1 | 0.004895755 |
| GO:0046872 | metal ion binding | MF | 1 | 0.005674331 |
| GO:0004197 | cysteine-type endopeptidase activity | MF | 1 | 0.006739034 |
| GO:0004775 | succinate-CoA ligase (ADP-forming) activity | MF | 1 | 0.007170478 |
| GO:0003989 | acetyl-CoA carboxylase activity | MF | 1 | 0.007170478 |
| GO:0003878 | ATP citrate synthase activity | MF | 1 | 0.007170478 |
| GO:0016620 | oxidoreductase activity, acting on the aldehyde or oxo group of donors, NAD or NADP as acceptor | MF | 1 | 0.008657888 |
| GO:0005044 | scavenger receptor activity | MF | 1 | 0.01119052 |
| GO:0016817 | hydrolase activity, acting on acid anhydrides | MF | 1 | 0.01299148 |
| GO:0008519 | ammonium transmembrane transporter activity | MF | 1 | 0.01336087 |
| GO:0030247 | polysaccharide binding | MF | 1 | 0.01645672 |
| GO:0019904 | protein domain specific binding | MF | 1 | 0.02026776 |
| GO:0003843 | 1,3-beta-D-glucan synthase activity | MF | 1 | 0.02440735 |
| GO:0008603 | cAMP-dependent protein kinase regulator activity | MF | 1 | 0.03360618 |
| GO:0043169 | cation binding | MF | 1 | 0.03549018 |
| GO:0008237 | metallopeptidase activity | MF | 1 | 0.04392685 |
| GO:0016779 | nucleotidyltransferase activity | MF | 1 | 0.04392685 |
| GO:0004842 | ubiquitin-protein ligase activity | MF | 1 | 0.04392685 |
| GO:0042626 | ATPase activity, coupled to transmembrane movement of substances | MF | 1 | 0.04696416 |
| GO:0004013 | adenosylhomocysteinase activity | MF | 1 | 0.04947078 |
| GO:0003956 | NAD(P)+-protein-arginine ADP-ribosyltransferase activity | MF | 1 | 0.04947078 |
| GO:0005509 | calcium ion binding | MF | 0.06185075 | 0.6569165 |
| GO:0000287 | magnesium ion binding | MF | 0.07606465 | 0.2031207 |
| GO:0004497 | monooxygenase activity | MF | 0.08138866 | 0.05224305 |
| GO:0004812 | aminoacyl-tRNA ligase activity | MF | 0.08958223 | 1 |
| GO:0004386 | helicase activity | MF | 0.09160222 | 0.3444241 |
| GO:0030170 | pyridoxal phosphate binding | MF | 0.1095715 | 1 |
| GO:0004221 | ubiquitin thiolesterase activity | MF | 0.1289405 | 0.3941033 |
| GO:0004222 | metalloendopeptidase activity | MF | 0.1305995 | 0.08564805 |
| GO:0003777 | microtubule motor activity | MF | 0.1337035 | 0.3072018 |
| GO:0004674 | protein serine/threonine kinase activity | MF | 0.1512788 | 0.7757305 |
| GO:0004672 | protein kinase activity | MF | 0.1549472 | 0.857042 |
| GO:0016887 | ATPase activity | MF | 0.175995 | 0.116248 |
| GO:0016787 | hydrolase activity | MF | 0.1865702 | 0.2218756 |
| GO:0000166 | nucleotide binding | MF | 0.2521037 | 0.3178902 |
| GO:0004553 | hydrolase activity, hydrolyzing O-glycosyl compounds | MF | 0.2715341 | 0.6531162 |
| GO:0051082 | unfolded protein binding | MF | 0.2792626 | 0.3937401 |
| GO:0003824 | catalytic activity | MF | 0.2849442 | 0.2330835 |
| GO:0031072 | heat shock protein binding | MF | 0.5212821 | 0.08416842 |
| GO:0017111 | nucleoside-triphosphatase activity | MF | 0.5548871 | 0.1736517 |
| GO:0016491 | oxidoreductase activity | MF | 0.6709207 | 0.2734823 |
| GO:0008146 | sulfotransferase activity | MF | 1 | 0.06092848 |
| GO:0005488 | binding | MF | 1 | 0.06747134 |
| GO:0004198 | calcium-dependent cysteine-type endopeptidase activity | MF | 1 | 0.07936578 |
| GO:0004519 | endonuclease activity | MF | 1 | 0.08048398 |
| GO:0003924 | GTPase activity | MF | 1 | 0.09714019 |
| GO:0050660 | flavin adenine dinucleotide binding | MF | 1 | 0.09832387 |
| GO:0042802 | identical protein binding | MF | 1 | 0.130969 |
| GO:0048037 | cofactor binding | MF | 1 | 0.219752 |
| GO:0004190 | aspartic-type endopeptidase activity | MF | 1 | 0.2617132 |
| GO:0016791 | phosphatase activity | MF | 1 | 0.278546 |

1. BP: Biological Process; CC: Cellular Component; MF: Molecular Funciton
