# Supplementary material for: Comparative Genomics Reveals Two Major Bouts of Gene Retroposition Coinciding with Crucial Periods of Symbiodinium Evolution
Source: Oxford University Press journal article supplement (doi:10.1093/gbe/evx144), 2017-08-01
Supplement: Supplementary_file_2_evx144.doc [file Supplementary_file_2_evx144.doc]

>Skav225498
CCATTTGGCTGAAccactatgcttaaccactaggatgaaccattatcaaccacgatatgtcacctgtagcacttctagccattatcattcagcactGTAGCCATTTGAGCTCAAGtctcttggctcacagctgacaagaagtcgattgcgcagcccatggacacagatcactgctgccagcgtctatttttctccactatcccgagatgactccgcaggatcccatgttcgtgaaccttacgcacgcagctggggcagactgccattggtctattgatgaagtagcattcgtttcaacaggtgcatctgacgccgcgacagaagcgtcggaggcattggcctgcaaagtccccgccttggtccgccatgctggcaagggaaatttctctgcagttgaagtgctgctgagacgcggcgaggatccaaacgtacaggacgactttggc
>Skav217033
TGGCTCAAGGCCATTTTGGttacgaggccctagcgggcagccttgtttgcgtttttccttgcc
>Skav214079
ATTTTGGCTtggaggaaattcgagtttctgtaATTGTGGCTCAAagcactagaagtgcagtagttaggttcaaaggggGCCTTCTGGCTACAAGggtagcttga
>Skav236065
CGTCGTCATTTTGGCaacttaaggattgcaatttggaaggcacgattatctccacaaattctgccatgagtgcgtgtgaacgtcccggacagtggcagcaagcactgagtcttttcaatcgaattcatgatctgcttctgattgcatccacggtcacctttggtgcagctatcagtgcctgtgagactggcgcacaatggcaaactgctactaagctcaagggtggtttcggaaggcagtactaacataagatacatgtacataagatacatgtgccacatagatcacgaaccaactcctctggaaacggcacgacagttgaggcccttgattTTTTGGATCAActtcaagagtcttccttgaaagccacggtccgatcctttagcgcagctatcagcgcatgcgcccagagcgggcagtgggaacatgcactgaatctgcttgaccaa
>Skav225641
CCATTGGTGTCTCAAGtttcatgggagtcagtgtctaagtagcatgagcagtctttcaatctgccaagttttgaacTTTGGGCTCAAttttcctcagtttttttccggttttcaagaaggctggacggcgtgcagcctttgtccggccgttttaaggtaga
>Skav204860
TTTGGCTCAAGctcaAGTCATTTTGGCTCAAGtggccgcttggtccaacggtgtccagttgtatctttcgtggtcctgggaacgttggtgtgtggc
>Skav202253
TAGCCATTATTCGCcatagatatCCATAGCTAGTTGGCTCAttaaccattttttgagtaactcaattaatgagccaatagctatgaataggttaacttggtatcaatgaaccaattggctatggataggttaacaatacaaatccattgcaaattggttgattaatgaatcctattaaacctgtccatcgattaatgagggttcattaaaaaaaccaactagctcattagtctcaactccac
>Skav226224
AGCCAATTTGGCTgtgcatggtgatcttggactctcgattgtttttttcattgacgattaccatcatagtatatttccagacattattatagtcatcttgttaatagttgatagtatcactatatatagttgttgctatttgaacaaattattgctattgttcttattaccatgcatgtattggtaattctgggtaatttaaggtcactaggtgtcgttggtagctgctgattctcaaccatcggtttgccgTTGGCTCAAGagcataatcatttttttccgtggcccaatggactttcagtcggagagaagcaagatatctctagaagtcccacaagagagagatgccatcgatgacatccaggggtctcctagcgacagcaccaacactgacgagtcgccaatggactttgagatcttggcacccagacttgctcatgaagttgccaag
>Skav218392
AGCCATTTGCTGAAGgcttgtttcaagtgatccaattgtcattgcaaatctgaatcctgatgttcgtgtcatcaccatattttaaacttcaaacagtcatttgacttggacctagtgagttcgactggtgttggctatggccgcatcatcaggtagcttctCATTTTGGCgcttcactggtgtcaatgctgaagctccttccaagaatatgctgaagaaggttcctgcgcatgcattggttgctagttcaagagggacattaaaaacacaagagccatttgcagtgaagaactttccggctttcagttttgcagtcgcgttttgtgtccggctggccttgaattggcctgcgaggatgtgacctgtacacaaaattaacttctcaagcattgatcccactcctctggtgacccatttgataattccactaggcagccaatcaacgcagggcgcgtccaagcaacagct
>Skav208576
GTAGCCTATTTTGGCTCccaaatgagccatctcatcttggacccaaagaccttcaaagaccaacacggtcaggaattatcactgtagaccaacaacagttgcaatgacccagagggttttgacatcggcgctcaacggtttttgacatcggctctcaacggtttctactttctggtcactttccttttcgcagtgaacctggacgaccttccgtgccaatgtcatcacctttgcaaagagagttcgttcctgtgcacggcaggaccaagtcaatccaagagcatttcgcttgaagttgcttgtgacatttggaacgactaatggaagaaatggacaagctagttgggattgatggtttctcaagagttggtggaagatttcttgacggaactctgttgacagacttttgCCGAAGCATTTCGGTTCgaatcgtggcctccgtcgaattgttgcgcggtgctgaaa
>Skav209908
CATTTTGGCaccgcaggttttagggcaacaacgcgtcagcctggcaagtgcagctgctgcattgctcattgtgtgatttgccaaggcacttgattgcatcagtaggttcaatgtgattcaatgtatgtaggatattgtaggatcatgtaggctctggagcctgaaacgttctacagtttcaaaagtcccgagcaagaaatctgctgcgaattgcgtgcaaccagggatcgctcagctgatctcagcTGGCTCAAGacctgaaaggcaaagcctgtgcctccgaggaagggctgatgccaactg
>Skav221452
GTAGCATATTTTGCCCAAGcttcaagcgtgacagattctctttgcaatgtcggagtggagcacggaatgcagcgagcagtccttgttggagtcaacaatccagtcgtccaagggtcctggattttctgaaaggatggcttcggCCGTGGCCTTTTGcatgagtgctcccatgatgattggattctgatgtctgcccacg
>Skav228921
TAGGAATTTTGGCgaatgatttttgtcgatggcgtctcaagttgactcggatgtgatgattagttgatgcatgttgatgcatccatcagagaaatgaagcagctgacaagggtggggctacaggggattgccaggggagtggcatggaagggtgctgagctgtgtaggaggtggatgggcgagtttctttgcgagcccctgtgatggcagcggcaggaggcgccatcttcacacacatgcgttgtggacgttggaagctcagaaatgagccattgaaattctgaaactatcctttctttgaatccttttcggttctTTTTGGGTCAAGatctttcagggttcacctatacaaaggcttcgccattatgggcgtgagctaattgGTAGCCATGGTGGCcatgggatgggatccaggtagcccatgggattccc
>Skav225648
AGCCATGCTGGCAGAAGatctgccacaagcattgttggcatgcctagtctccatgtcttccaaaagcagtatgtttacgctcatcacaaacataggcattcctnnnnnnnnnnggccgggctgacttttgctgtttggtatcatgattcgctggccgagacagtcaaagactggctccttgagcaagcaatagaaactttttgccgagacagagtagaggccagcaatgagttcaCCGTAGCTATGTTcagattggcgcaagtcacaggcaaagatggcctatgggagtcacatttactgcgagaagctaaggaaagagtcgatcaaaggctcgaagagattgaaactcttgggggagaggtcagatcgcttgaagaaggagcggcttttccagcctatttgcagctgcagcttgccctccaaggtttggaacaagggaccaaagaattgcagggcaaggccttggtcaacttgttgaag
>Skav225884
CGAAGCATTTTTGGCattggTTTTGGCTCAAGacttttcttcccaacaagagctactaggattttttccgctgaggctttttcaagcaatctctttgagcc
>Skav216888
CCGTGCCATGTTGGacggcaaggtgtcgaagcaaagatagctacattggtacaatccatgcgggttttttgaggttgacatgttcaccaggaggtcctcattgctgcggtggtctttcatttctccaccaccccctttttatttctcgttccaccatcatcgtattcaacttgccatagctttcgtcaactgcctcgaatactagtgaatactggacacatctggatgctatgttcctatgtgcaccatggctgattggatttgattgtttGTAGCCATTcatccagttgacacgcggtccagccatttatatcaaacagcgcccagccaaagctttcgttgctcgacgaagcgcagttcttcaaattcttcatgcactcc
>Skav236464
ATTTTTGCTCAAcactgttatgaggGCCATTGTGCCATCAAtttggaagatcttgaattaccacctgcacttcgc
>Skav215454
GCCACTTGGGCTGAAaagcatggtgcgggtgcctcatgaacggtgccattgcatgCCATTGCCATTTCAGTTCAAacccgctacagtagtttccatattgtgcctc
>Skav209982
CCATTTTGGgtgtcctcggttttaagaaaccaccatatatgcatgttgtcaatcttccaatgaccacattccaaagcgccaatcccaactgatttcacgagagcattgctgtgacattgccatgcgccacctgctatgtttgctctcactggtccatgcggttgccattcccaggcacatttggtCATTTTGGAACTCAAccgaatcagaccaatggccgaaa
>Skav208939
GCCATTTTGGttgatgtgcataattctttgatattattaaattgtgtaagctgctggttgaaagcactgctcactattcatgatcgcaatcaacaaaaatccacgcaaacatacattcgataaatttatcatggggtatgtgacatcctaataccctcaaataagactcaatcaggccataccaagcccaacaaccatcatgacagacccttaggcacagctgaccctcgtaagccaaaggttgatcatacattgtccatgagtatgcacgatccatactaaggttaaatagtccacaatgAGCCTTTTTGGCTCttcctgcccgtggtgaaggctgccagtcaggggtagggctgcaatcgagcc
>Skav210464
TAGCAATTTTTGGCcccgagtgttggactatgaattgaccattttcagccatttgaagccacggtgttgaatggctagcaatggctaagatcttttcaacacggtactccaaaagcttttgaaactcgagcacgaaggagcagcaaaaacatgcgcagagtgtcggagtgtccgtaattgcaatgtgtgagttcagaggtgttgTTTGGCTCAAGtcattcaaaagtccaagcgg
>Skav229097
CCGTAGCCAgcacacgggtagaggaaagtccgccatttttcctttgcctacttccaggggtgccttgagtcaatatgatcccaacctgaacgatggagtactatcatgggtcactgctatgtgtttgtccttgaactcgttgtggggagaagaagtgcgctatgatgggattccaagtgctgcccagcggggatgtctcgactaattggtcccggacgcgaagcgcttctgcgagtgcactgttgcacttgacgacatcagctggagggaattcttccaggtacgtagcatcgactataagggggacgagatcaaagtagggaaatggttttgttggaataatatttctcctgccttgccctctgaaatcggtgcagtgccccttgaggaagtttgcacatgccagtattatgtTACCCATTTTGacagctttcttcgcccacaggaaacttggggaaagcttcccaaacccaaggtg
>Skav226640
AGCCACATTTCGCTCAAGttcgaccaggaaaacccaccggaccgcagcgttcatgtcttttgtggcccttttttctttctatgcggtgtCCATTCTGGCATCAgctgagagggaggaagtggctaccaatgatgtt
>Skav203398
CCGCAACAACTTTGGCATCAAaggaaacaaagagaaaaggaatgaaaccaatgatatcatgagattattagtatgtagttagtatgatttatcttagtcatgatcgcgcatggctggaatatatcagaagccaagaacaatagggatttaccttgacaaacaacaatggggatgttgcatgatgtcagaagtcatccactggtgaatggctagctacagactagttcggcagacagtgcatcgcggatgagcaaatcaaagcaaagcaacatacaaagaagagcggcatgggctctgttggcaccagatgtttgatccacttcgatgaccgacagagttccttcaagTTTTGGCTCAgacacaccaggcgcttgcacaccccacggcgcacagagaacggatcagctgcc
>Skav223141
TAGCCATTTcccattattaaccattactttttctcaattttctggcgtgctccatgtgaaacatggtgaaccagatcggccaaggcgtatctggcagtattaaccactacgaattaactattataactaacattaactaactatcattatataaccattgtatatcagccattatcaaccattatcaaCCATAGCCCTCTATGCTCAAaagtccggttcctaccagcaggtggggctgttaccaaccgatgaccgggggtgcc
>Skav230230
TAGCAACTTTGGCCCAAGcgctcttgggccaccgccatctatgtcgtatctcctcatgttaagctcgatgcgagcttggatcccaagtaatgatgatgtcacgatgtcaatcaggatagccaggtctgtgttggactcgcaccctgattcactaacggcttccaatggcccttgcccccgataaaaccttcttaaggctccaccattgtcagcccttaaggcttatcaagtgaggtgtgcagtgatgggctcatcatgatgtttctgggacgTTTTGGTTCAAagtcccatcgactgctcgaagcagcagaccagcc
>Skav205644
GTACCAGGTTGGCTCAcgcaactgccgacatgttgaacctctgggctgcagctgcgcaagggatgcaataccctgaggctttttttttttttttgcatcctattgaactccagcaTTTGGCTCAAtacagggtgatgcagcttcagaacggacaatgtcccgcaagccaaatgcgcaacactgcaagcctctaggtttgcccagagagaaagcactagtttcacatggcatgactgtcagcattcaaccatcataagccgttgataatgctcagagtaaatcttttttgagctgagcaagactcatagattgctcaaaggctccaaaggttgctgattttgca
>Skav219963
agCCATTGTTGCTCAgatcctggacaaggcgaattacatgaaccaacaagagttgtccaactgcttgtgagcatgcgcgaagctcacacaagttgcgcctgcagtgctggcggcggtgccaaccattgttgctcagatcccggacaaagcgaattaAGCCATTGTTGCTCA
>Skav205392
TACCCTATCTTGGCGCAAaaccgattagtggtcaacgatgcttagcaatgactggtcataggatgtcataggcgtttatagattgtgatgctgtgatcagatttctttggtcatagtgattgattgccattgattgccattgagtttcactagagtgttgcaattgtcattggatattggagtgtactgtttcgtcgccaataccgtatgtgttgaaaaccagtcattttgttaatcaaaTAGCCATACTTTGTACTCAAaagCATTCTCGCTCAAGccaaactttcgttgctcgacaacgcgcagttcccaaatcccta
>Skav235858
CCATTGTTGGTCAAaatgtttgttcaatatcttatatcttcaagtttccaCCATTGTTGGTCAAcaatgtccgttcaacatcgtcaagttcaacaatggttcccaagtttttccatgaacagaaaaagcttgacgatgacaagactttgggaacctgtcactggtccggatgctttactgtcaatggaagaagtggtgctttccaccaagcccggcgcccaggagaccc
>Skav234930
CCATAGCCATATTattggttggttaatattgacCCATAGCCAGGTTGGtatggcgttgatccatggaaaaaatgcgggtatcactcaccgatcctccgggcgtcatggttgccaccgattgggatctgggatccttcaaacattgtgataccacccactcacagatcccggcaagaacaagacctactatttttgaaaagatagtgtatatatatatatatatattgtatatatatatatatattgtatatatatatatatatatattgtatatgtatacattcatatacatatatttgatgataaaccaccaactattcatcgaaagctgggcttgggggtggttcatcgttcatcaaaagataggctgagccactccagggcgttgctc
>Skav219739
TTTGGCATCAAGttgtagatgttttttttgatatcaggagTTTGGCTCAAacatttccgcttttacttgcagataattcggcctgtcagaaattcacgttgggcagtaatatttgaccttcgggatggcactagtcccccactgcacggggactagtgccatcccgaaggtcaa
>Skav210890
CCAATTTGGCTtctaaaggtgtttgtcaCCGTTGCATGTTGGCgggttcaaacctagaacatgccaacggtttggatatcatccaggccagtgttggtcgagctggtcgacttttctggTTTGGCTCAAGtgcaacttgagccatttcttttgagtcatttcttacgcttcagcagtgtcctgtttaggggcccccc
>Skav225763
CGTGTCATTTTTGCTCccacttctctcaccttctttgctacttgccggcgtcttgggttacaaatttatgctggagaacagcgagactcaaattttcatcagattcatgagtcgtttacatcatgactcctggaaaatcgggatgtctcatgataggcataccagcttacaccagcataccattgtcatgttcatctagatgggttgcagcaactgttgaccctcattgggcagttgagtaggtggctgctgcacaagtgactcaggcattagtaccgtGTAACCATTGTTGGattgctgtgaccattgacccaacaagcttgatatcatcttggtttcttaggctcttacctgccatacaatcaatttgg
>Skav219863
AGGCATTTGGCTTAAGgtagatcccttgttgatacccatctgggaaTAGCCATTGGTGGCactccccaatcattcccaaagatttcgtcgagatggatcatcctggaatggtctttgacacgttgtccagctttgttttctttcaaaaaaccttcacaaagcgccaccgcgttaccatcactgcattagccacccatgtggcgtggctcgcgctgccc
>Skav224121
AGCCATTCTGGagatcagtttcatttcaaatgtgtttttgcaatgtgagagcgtcagctaatcatttgcatccatgccaaatgtttgttgaagAGCTGTTGTGGCTCAgcgcgagcggaactgctccgcagagactgttgataccagtgctccttggctgagactgtagtggaaatgcagtggttccaacagcaggcacacggtgcgaaaaggggcaacatatatgatgagatgagtctcgcaaattgtgccgtaagggaaattgctaccatcaatcaagtttgtagcattgaacaagaatgaaatgatgatagcgtggcttccatctttgttgcttggatcttcattgacccaggctccactcctttcctgtcatttcgtgagatttgggt
>Skav201446
GCCTTCATGGCTCAAattcttcaaacttcagggtttggatcccttgttgctgcctgggtgctcctggcctgtttgctgacaacttgtaagcttgtccacttcagccaccagcacgcaccagagtcatgggtccggtcaagcagccgtttgatggaaacactttttgtttgcaggttttTTTTGGCTCAAagagacttcctgttgaagggcgatgtcatcgccctctccgtctggtcaagcaggccaagtctttaaagacttcaagggcctctgtgacaaatgggatGCCATTTCTGCTCnnnnnnnnnnnnnnnnnnnnnnnnnnnnnnnttcctgctcttcgctcccgtctccgtgatgaagggcgtttgctgctg
>Skav229859
CCGTGCCAGTTTTGGggggcaaagaaccaggccgatctgaaatgggttcgctgagcacctgcttttgaatttcagggttgaacttggCATTTTGGAACTCAAGaagattcaatagtttcagctgttgaggatttgaattggttttgatttggccggcccagcagcagcgcctgaggtgaaccccatacatattttgagaatggcgcctgcaagaaatgtgggcttttttctgcatggtctgatggcggaaaagacatctgccacacatggccattggaacagactcagagcatgctgttgttcttgggcgcggcaggtgttgtgctg
>Skav204259
CCATTTTGGgatgcctgccctgctcctgtcatgaaagtaaagatctgaacagcaccatgttgatcatattccgtcggacgccagttccaaagcactattcttggagcaTTGGCTCAAaggtttgagcacaacacttgtacagtatcatggcaagggcctgatttgtttcattgcaagaggagttgccacattgctgtatcagcaagacatgagctgctgtgccagtgagcagtgcgaagcagttgcgggtgctcggtcatcttggcacacacctgatgttggacctgaggaaccccagttgcctgatcttgaatgcgctctgccggaagaccggtgtggagagcatagacaggaaggtcctggtggg
>Skav211502
GTTGCCACTTTGGCagtcgttctgggagggggagctttggccgccgccacatcaaggttgcccgcaacaaaatagatgttgtacgacatggccgaaggataccagctaaatgaaaccctgagcatcgcttattgatcctgttcaataagaataggtgttttcttattgatcttgaatattgatttttttattgatattttcaataaagcccttattgaaaaaaaacagaaattatataaatttctatttgattttcctattgatttttttcctttttttttggggtggccatattgaaaaatatattgatttctgtattgattttcttattgatttttgggatgcattttttggtacaaatgtggcTTTGGCTCAAatggctttcttgttttgctgccttgccaaaaggttggggggctaagtgattagctttgccttgttgctgcagcccttgctaaaagggcttggctgtacaagttgctttcatccttgggaaaagg
>Skav204664
CATGTTGGCACAAaactatatttgcaaactaataaaacagtatcaaccaccgtgaatcctctttgcaaagaaccaatcagatcggcaaagtccgattagaccaattgtagtgacaggccaatcattcgttcacatttgttcgctggtgttgtcattgtagtgacagaccatcattgtgatcattgtttttgtcttcaagattgttgttcttgctgcatggtacagttcccttgcaacatgaactaagggagaagtatcttcagggcgcatggcattgatggccactcttcgcactttctatgatcattatgaactatgatgttggaatgactgctagctgacatggctgtttctcaaaataggggtacccccaaatcatccattacaaactatttatagtagtaaaccAGCCATTTTcggggctccctatggcttgagaaaccaccacattgttgcaaaatcaaccccactcagcaccactgccatcacgca
>Skav220018
ATTTGTGGCTCAtattttaccactgaaatgtgtcacatggcTTGGCTCAAGaaccaattcgaatcatttgacgatcgccagagaag
>Skav227815
AGCCATGTCGCCTCAgttactccaaaaggatgaaagaggcattgaagctaatgtgccatgcgcaggcaatgacattttccaaaggaagtataaaagaatgtgaatgatcacatttgcgcaaatcgccagaaatcatcatgctttgaccttgcatatgtatttcataaggtcgcgctttagcttggcTTTGGCTCAgattctgaag
>Skav211931
CCATAGCCATATGGGtgtttctccaaataagggacccctgaagcagcctgaagcatccaatattactctagcagtttctactaataatcattaataaacgatccatttttggggtcccccattttgagaaacccctcatatccacatatcctgtctcttcgttgaagcactctagctgcccgagggcccttggaaccgttccctgtggaATTTTGGCTCAgagcatcgtgatgatgggtcagtggcgcc
>Skav209949
CCTTTGTCATTTTGCCACAgaaacctgtgcttcaggatcccatgatcacaagagattggggcgtgttcttttcgtgtatatttttctccataagattgtccagggaacatgcggaacttttgatcaaactttgggtatcattctaagactaagaagtcgcaacgggttggcgCATTTTGGCTtccagtgagccacaagctgtcagaacaggccaagagtgaacccgtgagactaaaggcatcgcaagtggcaagtcacaagcacgggctgcaatcttgatcacggatactttcaaagtgatctgaaaccaaaggctgtcttggtCATTTGGGCTGAAtagtttggcatttctgtcagggtggcaaatggtgccgaaacattcaggaatgacgagaacatgtgacagcacctttttgatgctatcaacatctatcaactgtcctttcgcgtccaacatccaccgatc
>Skav234520
TAACCATTTTGttcgagcataattaaacacctatccaatactacaaactatcaattcatttgttacttgaacatacgatttataagtatgactagccatagtaacaataatgaactaaacatttatcactaatcattgactaagcatcaatgaaccttgagacactatcgtgtccacggtgcgccgtgcaactcacccagtcatccgtgttccatcgatgaagctttcaggaactgaagggtgactgatggtggatgatggtggatgatggttgatgatggttgatgacagtggtgaatgatgggtaatcggtggcaaatgattggttaatgatagtttCCGTAGCCATTTTGGCTCAAGcgttttgctcagcagtgacctgggcacggtgaatcggggcgtggaaaccgaagaaagaaacgttcttcgaggagctc
>Skav233777
CCGTTACCATTTTGcggtaatcttgcgggacgccatcgttatacagacttgcatcgaagttgggtggatggacactgatggacattctggaaaaggctgtgccacattcgatatgggcgtttctcaaaatttgggacccccaaatcattttttctatcagtcatttgcaataataaaccagcatttttggggtatccatattttgagaaaccaccatatgttgaattgccatatccccaattgcccagatccttagttcaggacttccaagcagctcacgcaagttcattggagccggggccaagttaaagatgttgccatgtctttgCATTTTGGTCCAAGccacccccccgcaattgcacccaactgaagtc
>Skav219391
TAGCCATTGGTTGGTCAccatcatcatcctcaaccctcactgttgtccaaccatggggcgctccccgaccagactgggaggttattccgctcatcatgcctacagcctcagcaagctttgcgatatcatgtcgcttggcgggggtagttggcatcatcgaagcaggtacatatctggggggtttctcaaaataggggtgctcctaaatcatccgatgttaatcaCGTAGGTATCTCGGCTCAgcctcccaggggctaccaggcttcaacag
>Skav236389
GCCATTTTGtcggcgtgatagtcgtatgaacaatatcctgaagacactgcactttatgatctcccagaaacaggattctgtttacgtgctgaaatcttgttaggtttgggaagaccaccctgcgaggatggcacagaaaaagccctgaactgactggatcagcgttggattgaggaaagccgcatgagatctgctcggagtttgatgcaaatcgggtaagagtagcaattcgtatgatttgtggagtcattatggatccgtccattggagaagcgtacttttgtgctagctctcccgtgccaaggcattcctcttccaggccggtttcttcagagcgcaagattggaatgtgtagtgatgaagtgatgtgtagggagtgatagagaaagcaatggaggaatgtctatgaatcacaacgagctgctctttGCCAGTTATTGGCTCAAaactttactagaagcccctcgtcagagcc
>Skav228203
TAGCCATTGTAAGGCTCttggatgttttccagtgtacaggccattagcctttgaggcttgtgtctaccaggttgttgcttcatTAGCCACTTTGGCTtgcttctgttctggtacccttggtgtcttgatctcagatttttttccaagtgcattccttcattgctggactttgaaagcatgattggctaggaagcaggctacaaagccacatgccatgttcaagcAGCCATTTGCTGGCTgacgcttctggacagagcaccaagagaagccaacatgtttgatgatgcctggaatgctttgacaaagggaatcatgtaataccagtggacatcccaattctaaattaacatggcattgcaccaatttaggccattattgccattgattgcttcatccaataaaagcttcttataccacatatccttgcttgtgcccc
>Skav212753
ATGTTGGCTCAttgtgtgtaacagtgcatgtttgtttatgatttataagtgtgatagctcatggctgccgattgcaaatattgatcaagtgacggagatggctgatgctatgtcaatagtagtttctagtagtttggatatggttgcaatgtcttatcaattctcatcgttcaatgtgtaatgccataggtgttgatgatacgttgtgtgccggaagacagctgcaagctcgatagtaagtccaaatagttatcaaccagcgaaaggccagaccgatgcagaccaagtacaaagctacccacgccccaaactcatgtgagttgttcacgaacattttaggtgccaagcagtgattttggtggggttcttggggtgagccttttcccttttcggtcgacctataaacgttgagctttgtgtgctttcTTGGGCTCAAGgtttttaagtgccgcattgccgtcccctggttgccgcttggttcagtcactttgggcttcg
>Skav228700
AGCCGCTTAGGCTCAggtaagagagcggcctcttggggagcacgctccgtgcggtttgcagaacgagctggagccatggatggggaggctccctccggagctttggcctcgtcccttaggaaaggtggtgcaacagcattcttcgccagtacgggagatttagaacgcttaaaaaggtttggtggctggtcatcggatgcagtacacgcctatctgtatgaagatcacaccgctcagagaggcatatctcaaggtatgctccataccgacaccatcccgttgcccaatcagctgaagccagaagcccgaaatcccggtcaggcacaaccgactcaaaccgaagccAGCCGCTTAGGCTCAggtaagagagcggcctcttggggagcacgctccgtgcggtttgcagaacgagctggagcc
>Skav225564
CGTAGCCATgattcgcaatgaaacttgatccacttggcgtacaggcatgatcaggcatggtaggcatggttcttgatttatgcatggcacttcctcctgccacgaaggaccccagtgtggtgcagaactatggcagtttgttggagcagcttgttcagacagttccagatggtcttgtatcggcctcagctgcgactttcagctaagctcaaatgcaagacttgcatggctgaaccaacatgaaccaacatggatcaaacgaaaatcaagcaaattgtctatgtccttctacgtttgtGTCGCGCATTTGGGCTCActagctggcatgatgaaagttggtggcctctgagcgagca
>Skav204296
TTTTGGTTCAAGAGCCTGTTTGGCTttgggctagggccatgcgagtgcctgcttggagaattttcgaatgataaatgatatcgcaaataatatcaagtcagcaaaatttaagtcgatagcacgtgtttgttttaatgccaatgagattcaatccctccatgacggtggcattgcaggcagtcgccttttgttagatcccttcatgagcc
>Skav213583
GCAAGTTTGTCTCAAtttgttgccatggtatcccatcactttgacccacccttatcgttccagacatgtctcaacacgtttcacaagccgccactaaaactgtggcggctcaggctccccagaaacgaccgtgactgggatcctaccgttaatacgcctgaagcgacagtgaaggagtctccagagtggaggaaaagtggctttttgtctctgtgactatcaccaaactaagagatttgggcttttctttgtaatatgaagatgtggcatttcgtcacatcttcatgcaatttcatacatcttccatcagtgaatgtatacatggtcgggacgtgaaacgtgtccttgggtccttgatattgttatgaactgCGTGGCAGTTTGGCGTCAAGcccagg
>Skav202342
GCCATTTTGGCTCGAAGgcagcaccatcggaagggtcgaagctgtatcacagaaccaacaagggatcgcaaaaggctaaaaaagtggaaagaaccttgaaattcgatgaaatttgatgaaatttggtccaaacccttgacatttgatagctgacggcttgttatatgcaaatgacaaaccatcaagaagacttcaagtcaaataggatcagttgctttctggatagtgaagattggcaatcgcctgcatgcgcgggagatttgaattggattgaagtgcagttttgttataccatcatgtgaTAGCCTTTGGCCCAAttcttaccaggcgtagtgaggctgtgacagcggacggttgggacaccgttgacccccacc
>Skav236735
CCGCAGCCAAATTTAGGGGTCAAGttgatgcagatatccagaaagaatccaatccgactcagcttccaagttttcaagcacgaccttacggagaaaaaatacggagaaactcactgatgagttcccagcgggtaaccctgaaacctcaagagcgacgcgtggagttgtgacatcgtcatgccgaggcgccaaggttttgacagttttgggggtcccaaaatgtctgagacttatagaataagccttttatagattataatagatcaaataaatatatagctatataggtcatttatatcataggctattcatagaataggtcatatacagccTTGGCTCAAtgttttttttgcttgtgcagctcatttgacctttgcgatgggtgcgattgagag
>Skav232627
TGGCTCAAGcgcgacgcctggcgcgcaaacacacggaggagtggcgcatcccgggcgcggagaacatcgtggccggggctgcccagggagctgcgatggtcagccatggctaaggagggctagggatggctagggatggatgggatggctatgggatggctatggctactagtatggactatgatgaccatggttggaaagcaccaaaaatcgctatgcgcagtagaggcgcagcacctgggggtgccgaggccgtggtgtcctacgagttgcagtaccgcaggggccttagattgggatgggaaggtgggtttttgtctatgaagatgtggtgctgggatcaattcattgcttatggcagggtcagaagtaggattccgttcggtcatggcctgattctGTCGCAGTTTTGGCCCAAagatgctcaacgcagccattcattttcacttaatatgtgttggtgagccgcgttaagccgaagtcacagggagagcactg
>Skav235193
AGCCATTTTGagatgagccaacatcaactatcgatatggatctttattgcaagaccaacagtgaacaaccatccatgtagatgcgggtagtgaatgaacaactaccaacggttgcgattggtcaaaaacgcaggaccaaatcaggcattcgacagggaaccctgcacagcaaaagggaaagggcaagtagtagcggtggcacacttgcctgaaaccctgggaaaaaaacgagattaacaaataggttctgatgagagtccctgaagattcaggcatggagcctgcatttcttcgttttgaccatggcaccagattttgtaccatgtacaataaatttttggatgaacatccaaacagtttgcaggcacctgaagTTTGGCTCAAGcactccagtccggcctaagagctacacagactgaacacatttcaaccctttgaatcccttcaacttcagccc
>Skav230807
CCACTTTGGCTCgaacggtgggcagagcttgggagctgcggcggatagaggtgcgggtggcggaaagtggtgcggttttccagttctcagcggcaacggtagaaccagggaaggtcatggtagcactgggtttgtatgggggggggaagcagcaaacatatgcaagagtcacggtagatgcagggtcaataaagggataagcagaacaccgtgcttgtgaatgactgttaatgagctgactatccgagctggtgatgattaccaatggaaaatgaTAGCCATTTTGGCTggcaactgtctcaaggagacctttcgggtcgtttcgcccctgtttgttgggc
>Skav226687
TTTGGCTCAAGaaATTTTCGGCTCCAGactgcagagcttcattttgtgccCCATTTTGTGCTGAAcccg
>Skav230803
CCGTAGCCCCTGTGCGTCAgcatccgtcatctacgttccctggagccacagcgatcaccatcatccaggctgtacaattaggatttcacagggtcaattgttggttttacagggtatggcccatgaccataggtgtgtagagtctagggttttgcgggttgaactctcgaattcccgggtgtccactggattcctttccaaacggccgaatggctttggcttcgttcgcaatatctttggtcatttctttgtcgggatgctcagttgcgggctgggatggccagagttggaaggattgaagctggcagcatcacatgcatcaactaccacagacgtgttggtttcgtacacagccagtcttgccatgttgaccaatttttttgccgaccattcctcatcgctggatttccaAGACTTTGTTGGTTCAAGcctcttctgcgcgttttttggcacttgagctttgctca
>Skav224259
CCATTTTGGacttacttcaatcttcatttgttttgtgatctcttgttccttttgtggcatagcatttgtatttccgattgcgatgggttctacagcatttcgagctttatatgctgatggctaaagggtcactcttttgcaaaacgatgttctgagctcctgggaaactgatgatcttccacatctgtcagtttaccatggtagaaccgatggtttgacacatttctGTAGCGATTTGACTCgtgctagcatggtcagacgtctcagacatgctcagcacatctcagcacaattccaccaatgaaaagcaacggttgtacagcacctgcatgaacagtgaagtgttaccgccatactgttcgaaaggatccagtggttgagctccaggcgaaaacggtggttcggtcaatctaaagactcgttgttttgggtaaatggaaagttgctgcaacgaggggagatggatctag
>Skav219808
TTTTGGATCAAGctactgcctcagcggactttaagactggggctggagcatcatggcacggaagaaggtgcgagtgacgcgttcttcggccgcagcaagaagcaggctgcacaaattgtgcagagcagctgtcagtgaagcatgaagccatatgaagcgccaaatttgcttatccccctttgcacaattgtcaacgcttggacggttgactgcaccattggattgcggaccgtttcattttgataagtgctgatttagctgcctttgttggtcatttggtggttcggaatatggggtggacctataggggtgcttggtacttcatgctcttgcccagtggttggaaAGCCATTTGGGCcgaggtgaaaaccacatcaaaaggatcatccaggaactttttgcagagctcgtttgaactcttgacggccagaccatttttttgccaaacttccccgctattgtggag
>Skav215422
TAGCCATTCCTTGGATTAAGtaggtaggtacagtagcttgttgggtcacgtttgcaccaggcttggtgtcccaacgcaggtgttgacagaaacaaacggtagcgatggaatcgacctgcgggtttttagctgggagattctccagattcccattgctctctaaggattggcttttgttccagaatttGCCATACTGGCCCAAattgcgcagaatttcaactgtcccatctgccagcatgctccctgggggggtgatcagatatcaactcgtgtcactcctcgacatggatttctggaaagacatcatcaagaacaaggtgaggtct
>Skav220781
TTGGCTCAAGctgagcacttttgggattgtagctgtGTAGCAATTTAAGGTCAcc
>Skav225300
GTAGCCATTTGTGGattgcaattgcagttggtttcaagagtcagaagggcgcatttggcagtgcttaatttttgacattggaacagactttcaaatcgacaagaacatagcaaaaaatgttttgcgaagtgagttgaggacatgcctccttccattgctcatagggaccgctgtccctgttgaaagaagacaatttcttcaatgtctTAGCCATTTTGGCccctgctcaccgaagtgacatgtttccatatttgagtccagcagtgtg
>Skav225197
CGTAGCTATTTagctagtaatgataagaatagccaccatgattcactagtccagtctagtatagctaaccatgataagctatgataaagaatttctgtcagtaatagctatcgaactcgtaatgaccattagtggctgctagctagtgaactgcgaatatatgtattagctactaattgttgccatcatccaccaagagttgctagtcatatagctacaatgtagtcgttctcgactgtttggatgaaccagcatgtagtcatgtttgcaattgttctgagaATCTTGGCTCAtag
>Skav204857
TTTTGGCTCAgtctaaagctttaccaatgaagtgcctagcggttggctccgttcacccgctggcatttggCCGCTGCCTTTTTAGCTtgtgccttctttgtccatacagaactgtgactgctgtggctctctctttgcagaggctaagtcattgtgactcggccgctccaaagaactcatgctgcaactggcagtgtgactcgagcgcaggatgg
>Skav235964
CCATTTTCACTCAcctctagatgctcttcattgcttttcatggcttttctcccttggctgaacttttccaaggcctctgccaaggcattgccggtgtgctgctgctactTTTTGGCTCCAGagaagcagcacagatctgtaaggctcccatggttctcagcaactgtagtgttacactgtagcatgttgcaaaaagttttctacccttcacaggttgcataagtttcgaataagtttcgaagatcttcaaagtgacaaattgaagcgcacagttttctgcggggcggagctgcacaagttctggggaccgcgtcggagtctccaaggcaatgccgggatggtgcaacgagactttggacatcgctttcgaagaccccgca
>Skav226566
AGCCATTGTGGatgtgaaatgtatcaccgccatcacataccaccaccctttgaaatctacagctGTAGCCCTTTTCGGGTTCAAGagcatcaagagcttgtcgccacaactacggtcgcacg
>Skav211029
TAGCCATTTattgGCCATTCTTGGCccttaattactactcattaatTAGCCATTATGaaccatggttcgaagtcatcaaccattcgaaactctttcaaaaccagggtgacactgcaggctg
>Skav218920
CGTAGCACATATGTGGCGCAAacctgacgacccacgcacgcgagccaagtacaccttgaaagcaggcaaccgattccggtgggactgaggaactattttatgggaaaggaCGTTGCCATTATGGgaaaggacgttgaaatacgttgaaggtaatttcagagacaagagtctgcaaacgaaggacagggacccagctccaagtattcctttgctgttcatgaattcttcagaatcgattgaaaacacaacggcatagagactattttgagcgtttttgctgatgaccaaggatacagaatttcgatcacctaaacatgttgagttttccacgtcttaacttgactactcgaatcagcaacca
>Skav220778
TTGGCTCAAGctgagcacttttgggattgtagctgtGTAGCAATTTAAGGTCAcc
>Skav230308
CATTTTGGTCAgaagtcgttcagaaatgaagacgagaaggttcaaagccgtaagtataggtggagacgccttggccagaatcacaagacacgatagacatcaataaacgacaattctttgatccaaacagttcatttgacaggcatctttccggctcacaaatctgttcccatcgaagccgaagctgcTTGGCTCAAGctgctgcc
>Skav227744
TACCAATTTTCGCCAAGctgtaacaattctactcatgaactctgtggttgtttccagatgacaactgCGGACCCATTTTGGggggttgcttgtcaccactctaggcattccatggcagtaccaccagtgacgc
>Skav229909
TTTTGGCTCAtgcgacatgatacgacatgctgccaatccagctttggaaagccgggaagattcaacacgtttctggggggtcatggatgaagcactgggcgatcggctggctgtgctgattttcagcaaggacagggcatgccagctgttgggttctttggtgtcgttgctgcaacgcctgaaaggagtggcgctggacatttctgttttgtacaaagcttcGCCATCTTTGGCcgattcctatcgtgtggtggaacgcttgttgaggcagcactatactgtcactagctctgtggaatggcattgg
>Skav205558
CATTTTGGCcgttgacttgtcttggttattggattcatctcagcacctcaggatgtgtaggaggtaacgagtgatgagtcatgtagatgtcgatgtgaagggtgtcaaaaattgcccgattgaccttgcgcttgaacaacatattgtacgattttgtttttgtgccgcatgccagctccggaagaccagctaagatgagttcattgttgcattccagtcgcttccaacatgtttgtagtttctaagccaatatttgctgaaactacatgttgcggccagaaagaacgttgacaaaatcagatgtgcattgcaagcagcttaacaCGTGCCTTTTGGCcgagaaaaatatttgtatgaatattcatgttcttagtttgaggccgcatatgttttgaacaaag
>Skav209236
CCATAGCCATTCGTGGCcatagtccaccaaaagggcaccgctgtccatagcgtaccaggatggatcaccggtaattgatactcagcaggggtcagcatggtttcttttatccatgatggactgatgacaAGGCATTTGGCTCtaacggtttgcaggatctcccaaactgctccgttttttgcctgccttagcgggtatcccgcgggtgcctgtgctccttttcggttctgggtcatccaaaaacccttcaattcgcttgtctatgcgatcctgctggtgggtggcaattttgcttggtcattgtctacacaacggccaccctcaacactgtgcgcagagcagcgcgcaggcaacgagcagctgctcgccgcgcttggtacttccacaagcgtggaatctgcccactgaggcggacacatcttcggagcttgcgctccgtgttggttcggcatcactccaaggacaacggcttcattgcggtgctcaacgcagcc
>Skav205298
AGCCATTTTtagtaataaaccgGCCATTTTGGgggtaccctattttaagaaacacccatatatatatatatattttaaaaacatcatatcaaatgatataatacaatgattatggatgttgatacacgatgagcgtgtcaatgcctccctttgtcaaatggaaaagacggctcaaagtcaattcagcctagcgccccttcactccattgcacc
>Skav225885
CCATAGCCATTTGGCTatgtcttgatcagatatcgcaatgtgaaaaaatgtcgaaggggcactgcaggcgattgccgattcctcaaagggtctcatcaaccgctgaagagtggtcaatggctgatagccatacatggctatgggtcaatattaaccaaccaataatagttgataatgaccaacaacaataaggtaaaccatggttaatgataggggaaccaggggtacggggtgaactgacccacagccaaatagttacttgaggattttgatcaacagtgatttggtctgtggcttcagccttttggattttttccaagcagacaaagaaaaatgatcatcaaagactgaccggttgatattgactgacccatcaaCCATTTGGGGCTCAAGatctttttgaaaagctcggtgtctcccttgcaatctccttgtctcatc
>Skav222795
GCCAATTTTGGTTCAAagaagccccaagccatctatcatgcagaagatggaagcagtagcacaattcaagaatgatgcgtgaacattacacgcagtttcccctcctcagctgttgcaaacacattgggatccacaaattggttagcccatggtggccccaaaccatgggtttccctgttacacatgagaacgtacctggcatgccattgaggaccccacctgctgcttggataaactcttcacttgccactgctctgggcagccgcgtgtgtccatggattgcaagtgagcagtggtgaaatcgaagctgttggttgagcgtttctagggatgtcagaactgcgcatggcttgccatcaacacagcaaggatcatcttTAGCCATCTTGGaataccaggagattacgccagcttcatttagccatcctgaaacatcctctgacgcattcaggagattacaccagctatttttcaccgctgcttag
>Skav233736
TTTGGCACAAGgggagattccattgatgaAGGCATTTGGCTCAAGcccccgggtgccaca
>Skav232974
TAGCCATTCATTGGCcacttatcagccattcattaggccattcactagCCATAGCCATTcactagccatattttgaccaccgaaaacagataccgaaaagcggatttttatcgaccaaacaaagtctctgcc
>Skav203754
ATTCTGGCTCAAGaatcctgccagccctgcggagaaaCCGTTGCAAGTCTGGCCAAaaaagatcacaacaatcactgaagatcctccaaggcgcttccgggtctcgcggagagcgccgtga
>Skav205400
AGCCATTTTttgtttgcatttgctttgggaactgaggaattcttgccatacacacctgctacagctatgcggttcctcctcgcagggcagtctcttgcccagacaagccgcctgggtcaagtcaaaccgtggaaacgccacgggcagattgcctccagcttcacactgaactcttgctgcctttggcacagcttcacggatcactgctgctgCCATGGTCATTTGGCTCAAGttttcgatgcccatagttgttgggccagttttttgactttttgaccatgtccaaaactggagatgatgccggatcgctcaaccacctcgtagtggcacagctcagcaaaacaaagatgtgcgct
>Skav200998
GTTGCCATTTCTGGtgacgggcatgtacttctgggcaccgattatgggcactgggccgaggtactaggcccacatgcgataccctgctgtatccatgccacgcgccctgatgcccacttaaccttgcaatgatgagcatggcaacgagataaacatagcgatccataggcatgcaagagatccatattatgtagtacgttgtgagctagactgggtggtcgaattacttggggaagattcactcatgacattggctgcacagctcggcatacctggccaatgactcaagacaTTGGCTCAAGtagtttcaaatttgtgttttcgcttcatggaacattttaggctttgacagcaccatggcacc
>Skav220713
AGCCTTTTTGGATCcgtccgtgccatggcaattgtttttttggatctgagtagtttcttgccaaatggcagcacactctatccacaatatgcaggagtttgctataggcaccaatgatagtctttggcgcactggacaagctcaaaacggcgggtacttgggtgttgctgcagctgggttgttggttggggtttgtggttgcctgccgcttcaatcaaagcgcacgtaattgcaattatttgcatcttcagtcctgccagcatgaacctcagtgatccctctgcaatgtgtgtgtgtgtgtgtttgcacgcatgctgtttgatcatggcacagagcttccagcggccggggtcagtctctgtttttgactcAGCCACTTGGGATCTAGaattggcagcttggattgtgcgaagaaggta
>Skav216449
AGCCATGTGGGGTGAAGgcaacttagacaagcaacaaccacggttagatcggatttatatgggtgtttctcaaattggggaacccaatattactgtaaatgatttgtattaaggaggtggtattggaggagttggggggtaccaccatttgaaaaaaccacctgtgaacggagcccatttcaccttgtcaccagcatcatgttgcatgGCCATCTTGGCCCAAtactaggcacacggattctttgcttctcagaaaacatgtctctcgctcgcttgctcgttgtggtccattagcagctgcttctcacgtgtttgcattggtagcggagccacccggggggctcgataataccccgggacaagatctaggtctttggcaagttcgttgcagttgca
>Skav217756
CGTGCCATTTTGagacaccagcttcaaggctttcacaagccaagacacagaacttctctcggaggattgaaaaaagtggcttttgggcggggcaaactttattcgcatgggctcgctcacacacgtatacatgcatgaacaaacgcacacacacacacacatcaacatcagatcttagctttgatgcagtttgctggcgttcatcatatttggacacatctggatctcaaaagacttatcataggcctttgtgctcatttagactctcggcaGTGGCCAGTTTGGtgggttttgaag
>Skav230450
CCGTTGGCAGTTGTTGGCTtggcctgtcgactgcccaatgccaattccgctgagcacttctgggactcactgaaggctgccagaattttacaaagGCAATTTCTGTCTCAAaacttacttaaaggacttggaatttgctgtctcaaaacttactcgaggatccttactcgaagtcactcaagaccttgtcacaggtttgaagttgagtaagttgagtgaactcaaaaggtcatttttccaaaatttccaaacttttcaagcttcaggcagggcatctc
>Skav201788
CATGTTGGCGCAAGcTGGCTCAAGcttcttgcaacctggcacaagtgcacttggagctttcttgctgtc
>Skav226938
AGCCATTTGGTGGCTCAgagccagggtatccactggtctccatgaaaaggagtggcgctaccagggggttgcctacgaatgatcaatctactaccgtggacagaatggtcatttgattatctaccgtttcctaggaacccagaaattcatagatgattgagcactgttattgaaccactgttacttgttgtttatagcctggttagtggtttcaaacattttttattttccctagtaatcattcatcattggttggttgactagctctggcccgagacctgccagtacttgtggtagagctgcccgggctgactcggggggatgaccgccatggatgattcgctgccttttgagttggaaccagtttttcctgatcaggttgggattcacgaagGTACCTTTCTGGCTGAAttggttctctttcacccaggacgacatgtgtgcaggacagcgatcaatcgaagg
>Skav214305
AGCCATTTTGGCTCAAGcaatatcggcttctttcttcgggccggatcaagtttttgggcaatggagtttgctgtgggcacgcctagaaccagcatagttgaacgctatgacgccctcggcacgtgggggcacgacaaggcagAGCCACTTTTGCTCAggccttcgcgcggcgtggttgttaactagcaccccgctggcacgaactgtgcagtgcc
>Skav232384
GCCATGTTTTGATCAAcatgttattttctcaaccagagtgttgctgcatcatggttgctgatagttgtttattcactacttgttctgtgtgcatgtttcgtttttaagatgacaacgccatcggaaatgttccagagtttatttgttcggacagatcatgcatgtttgTTTGGCTCAttcagcacgtgctgttcattcaagccgacaagtacttcagccaaactttggctcggtggggcccttcactggatctttgaagccaaccaggacac
>Skav207030
GCCACTTTGGCACAggtggacccaacttttgtttcgaccacgagtttcatgaaccaatggatccttgagatgaaggatttgctcactcgatggtctgtcccaccggataatcgaacacattacccaagggaaacaggtaatgatgcgttccataccggtccttcacatgatttgtctctcatccatgatgccactttgaccatgcgagaaattgattctatattcaatttCCATTTTGGggattgcagctcacaagactggacaacatactcaccttggcctgggacatgtcgt
>Skav231054
TAGCATTTGCTCAAGatttgctgctcaacatctttccatttctctacctcaTTGGCTCAAagttccagaggcttgcagtattttgcggttccgtgtccacacagtcgagagcatcttccaaag
>Skav208131
GTGGCCTTTTGGATCctgtaataatatagtattgtacaGTGGCCTTTTGGCTtgctttttcaagggacttagaagcgag
>Skav212651
AGCCACTTGTTGCGCAAGactggggtgcagggtgcaccccactggggtgatggtcgttgattaaagcattggcaactatgatttagagctgatttcctagggtttccctcaaaaagatggtgactttCCCTTGCCAGGTTGGCTtgccagaggctatattgttgcagcatcatgattgtcatgtagtgcaatgtgcgcgtttgaccgctgctgtttgttgctctcagcgcaacccaggtccctgccaggacaactcgcc
>Skav200777
CCCTAGTCATTTTGGCCAAagtcaacgcttttCCCTAGGAATTTTGGCatttttccctagtcagcacttcacaattcctccgagtacgctgaagttctgagcgcaattgccttgacaaaac
>Skav213458
TAGCCACTTTGGCTtgcttctgttctggtacccttggtgtcttgatctcagatttttttccaagtacattccttcattgctggactttcaaagcatgattggctaggaagcaggctactaagccacatgccatgttcaagcAGCCATTTGCTGGCTgacatttctggacagagcaccaagagaagccaacatgtttgatggtgcctggaatgctttgacaaagggaatgatgtaataccaatggacatcccaattttaaattaacatggcattgcaccaatttaggccattattgccattgattgcttcatccaataaaagctttttataccacatatccttgcttgtgtccc
>Skav223242
CCGAGCATATTGGCCAAcacatggtcacactttcaccaagccgtttggacagaatgggggttgctggagaagcttccgagcacttgtacatattctctgcgacgtgcagccttggggaaatcagctgggggtgcgttgccatgaggcatggacgaatatgcaacgtatgcccctggccaattcttcaagggtcaccaactgtcagcttgaaggactattcgcatgaacagcaatccatgacttcttcAGCCATTTGAGCTtcgaactcgaagtgtgggcagccggaagcaacttgcaatatcttgcaattgatatgtggaggttc
>Skav235837
AGCCATGTTGGgcttcagcagctgtgccatgttgcgacaagggtgaagggtgccgttggctttgcgaaaggcgaaagaacctaccaattggctgagggacatgagatgacatgaggcttcaaagacttcaaggtctagcgagcagttgccatggtaggaggcattagactttctcgtcaccatttgtgccctgtgcataactacaaggataggtcagcttgatctttattgtggtgttgaaagcacctccagctgatcaataagcatcaataagcaacatgtatacattttttacacatttgttcattgttTATCCATTGTGGATCcatggttgatccattgttgatgggatactgggataccaaacagcattttttcaacgacgcgaggaacccagcacgattcatagcttggtgagccgctcatgcg
>Skav207059
AGCCATGTTGGCTtgattcctcactctgaagaaaatcttgaatgaaaccaaacattggtcgtgttgaagcgtctgcattgctttgaggcatgttggattcagtagaatgtgtagaaaacatgaacttgcagttgcgcgtggcatcttttaaattctttgataatgtatgataatgtagtaggtactgttgacatgggtcgcaacaggcatgaCCGTGCCATTTTtttcctcacccaggaacgattccgcactccctacgcggtatggcattgggccagctgcaacatctacatgccttgtttgtggaaagtggatggctggatgcgcaatgcgagctgttcaacagggagaacgcccgagctattgagaatggcgagaagttcaagcaaagctccaacctgtataccatggacttctatgttgtcggtcca
>Skav205541
ATCTTGGCTCCAAGctgaaggcacattgcgcattcaccatggcgtttcggacggtgctgtcgctggcactctgctcctccgcttcagcggaggttgctgctaccaatcggtcgcatttccggggtcgcgcttcgatcgaggtgtcagccctgggggcCCAGTGTGGCTCActggacctgccgcagaacgacaattgccgggaagtggttcaatggtctgcaggcggtgggaagaatgatcccgctgcttccggttggtacaaaaatctgccgaacattgctggagtgcagtacaccgaggcatcagtggcagatttccaacgactctactattgtgctcctcctggaaaagacaaattttgtggcttgccgccttgcaccggttgcagcaaccctccttgcaatgactgctttgcagggcacccactctatgcctcattgaggccagggtgtgatggcaacaatcgaggcattgggtgtgtgccgcccaagacagcc
>Skav203764
CCGTGGCAAGAGTTGCCTCAAGgcatccgcgccaaagttcgtgagttgaagggagacttgcgttggagcctgcggcacggaccgtccactcgctgagcaaaataattgcacgctgcacatcgattgagaattcttggacagctacagtgaccgctcctactagatacttgtatgatgtttctataaagatttaaactactccatgaatatatgtttatatatggatagatacgcaagccatattactgagattcgacatgcagacacagcatcctgctcttgaagaagttgccaccctgaagttttgcttgtgtagaacgttttgttccaggtgagcaggcaggtacagcccaacatggatggtcagaatcacacgttcaattttcacattcactgttgccacatagTTTTTGCTCAAaattaggagcactctttgggctatgcttgcacgtgcaagcatgttgtcgcagca
>Skav226446
AGCCATTTTcatccacaattcgtcgtagttcgcaaatacgattcaccaacggaagctgcgctagccaacatgactggttgacccgtggttttagtggtcaataactgcagtccaaagtagctgGTAAACATTTTCGCCAAataaacccgccaaaatgttgctgctatttagctcagcacgagctctccatacccgtttggaactgctacgaaaagggccgtcaacatgaacattaattttcacatagtaactgctactcatagctactaattgccgataaacataaacattcaatataaactgttgctatttgctactggtaatttataatggctacaacataaataacctgtcatcatttcgccacatcaacggtcacgctgtcacc
>Skav218472
ttgTGGCTCAAGatcaaatctggctcaagccgtgctcacccagcgcaattcggtagccttcggtcgacggcctgcgggtgcTTGTGGCTCAAG
>Skav201018
CGCAGTCCTTTTTTGCTTCAActgcatttttttgatccccgtcccatgcggtaatcgagctacttcctgccttacctagaattggcaaatcgagagtcaaacttgctcattttatcagtatcatgattctttcttgggaaatccggcttcgatggtttgggtcagattgccagaatgaagaaaagtgatttgtgccatgtcggaaactatggtgtaacctcctgagaagcaacaagtgggttgccatggcacacagatgcagctgtGCCATTTAGCTCAAGcttgacaatccaaatggccgcaccaaggg
>Skav212622
TAGCCATATCTGGCagcagcttccacctgcgccaaatgtggcaggcttctgtttccaaagcgaccagcgctgctagcagccaggtgggctcccagcaggcccgaaagcgcaccatttcttcgcaggaaaccgctgccagcgtttggcgccctcccaggtgccggtccaagctgcgcagtcatttcgctcgatgcaatccatggttccttgggctgcaactgatggcgagtttcactgaagttgctatcatgcgtagtCCATAGCATTTTGatgctttttaactggataaaagatacagcaagatgcaatcatattttttggcctgcggtgggcttggcaatatcccaaaagaagggttcaagacatcaatggaagggttttggtaccagatctccgctgaaaactc
>Skav231576
CCATTGTGGCTtctgccgaaccattttacggcatttcatgtcctatctttcgcatatctttgctggttgtaccttatatacagtattgtagatgttccttttctctggggtcggtgttggtataaatacgactgtatacatatatgatatatgtaatgataatgatctttttgaatctttgagtccagacagggtgcgtaatttctcaaatttgtttgtttcttcgtttaaaaaggaatgcgtgtgcgtgcaaacattttggggtctgcgtcctagttgattcataatgacgggactcgaggctgttttaggtgggtggttatacgtgcatgctttgctagaaagcacgtttctttttttcacaggggtaaggaggcatgcaaggaaaccgttttcgtgaaCGCAGCCTGTTGGCTCAgtctgagacagcaaatctgcaaatcttaaatgcaaaatgccccttgcggagggcactgct
>Skav222207
CGTGCCATTTGGCTatgggtcaattcaccctgtacccctggttccctatcatcaaccattgctttccccatggaattgctggtgactatcccccgcttgacccagctcgccatttctcGCCAGTTGGCTCAgagcactcgttgtggccacttgtttcctcgattattttgccggggagctgtcccaag
>Skav201840
cgtcgcaaTTTGGCTCAatgaatttggctcagaagatttggaaagatcgcattttgaggtagtattcctcgaagaacccatgtcggaacatcccaagctcggaatccgactgaacaagatttgttgtatcggagctggctatgtgggtggaccaacCGTCGCAATTTGGCTCAA
>Skav225800
ATGTTGGCGTCAAGagagcgaacagcgttctgtcatttcacattgctaaaataagaCGAAGCCAGTTTGCGCTgtgcgtgctgtcctttgaccttgcagtgacttcgccgtgttcaacttgtgcggtgtgtccgcaggtggttcaaacgcaaaccccttgcagctatagccctctgtgtctgcggtgtgaccgcgcggagccagcggtgtgtccgcgctacagcttgcttgacgcatatataggttcaagcaggttcaagcgggctccgtcgcgttttcgattcttgctgcacc
>Skav209561
CATTTTGGCTagtgtgcatgttacggttgacatgtcatGCCATGTTGGCTtcatgttgtttactgttggacccttatgatagtttccactgctttgaaaattgctgtgcatcggcatggtgaggctcacccttgctgcgaactaatcgcggcaaacgaacagatcctgcatccagtggaggtttctgagaatgtttgggtgtttttcaaaataggggaccccccaaatcatccaatattagtcattgatacatattgataataatagaactcaaaactggggggggtcaaccaccagaaaaaacaactgtggcacaaatttccgcaaaaagccttatgtgcctactgccaatccccacgtccatgacttcattcgtgcttggatcgcc
>Skav212497
CGTAGCGATTTcgcatctttccttgatttactatggggagagccacttaggggggtCGTAGCGATTCTTGttgtgcccttgtgttttgctatgatttgtatctgttttttcttgttcttatgcatcaatttccatggatttccattgtgtttatgtagcattccggtctgaattggattgttcaggcatgtattctatcatattaaatggatcattttcgccagaattctgttgggaactgaacttcacgactggcgtccatcacttgggacgtttaataaagaatgatttttcaatcgggagcggaatccatcgctgatgttgggggctagcagctccatcctttttgacagggatatgtgcggcaagaagctgaatggaaaaaatcgatctctCCATCTTGGCTCgtaaggggcgaatgtggtgctgctgctagctgctgtcaacgagcc
>Skav230514
tAGCCATTTTGtagcctccttctctttccccagggatgggtacAGCCATTTTGtagaggtgcaaacctataggtccagccattttgtaagtttcgacatgcgtggggttgggcgcaagcattctgtaggcacattctggcggacccaagggcactagcgtaaatcaaacaccgatgttatatagttgatcctgtggacgccacggcaaagaaaacggttagttgatgatcaatcactgtgcttaaggtgaagtgatcgtggttcatggtggttgtgaaatggttgattgatggcgttaacgagatgactgcgatggctgattcatggttgattcgcggtcattgatggtgcaatgagcttaaatgatggttcatgatgcaaagtttggtcaaagattagccatcaattcaccctcattcaagaatgatttgctatagatcattggttcacggcggcaggctacTAGCCATTTTG
>Skav231015
CATTTTGGATCAttttggtatctttcgttcagtacttttccctgtttttttcttcttttttcaggtagtggctcgagagttctgtgccaaaatgactcatcgatgttgaccggTGGCTCAAGcacttctgcccctaagagcaacaagcccgaacgagcttcgacccttcatttgtgtgc
>Skav235763
AGGCTTTTTGGGTCAcaacgttgaccccgtgaaagcgttcgtgcaaaaccccccacccaacaagaaggctctcgtaTTTGGCTCAAGtgacttctcaatcaacctggccaaagatctagatatcaggatcttttcttcatatatgcgcgtgtcatcacatgtttgtgtactgtatgtctatgtatgcgatccatgtcgtttgtatcctgattttcacttacacaggtgaatatagtggaattgcatacatacagatacgctctctccatcccttcatttctctgccaagag
>Skav208620
TAGCCATTTTacaccctcagcttgggcagctgtttccaactgctgatgattgtcattgattcttagatgttgagtaaccctcagcgcacatggcttgATTTTGGCTCgaaactttgctcgaaagggtcaggtcttggttttctggcgataagaaatgctttggacagcgcattgtttgacattcacgactcaaatggtcaggtgttagttggagagtattggaattcccctgtggaggccgtgtgcatgaacatttttcacacattttcatagttttgtcgcagtttgaagtgcg
>Skav202512
TAGCCATTTGCATCAAtaaaccaaCCATTTTGGggcaccctttttcagaaccccccatataccattgcaattttcaacggaatccttcaatgctgcagcccagcaatgcaaagtgatggctgaagagacagaacctggtagagtgagtcaatgctggcggcatcgttatatgaggagctgggccagcattaagcaaccagcaaatggggatttctcaagataggggcgccctaaaaatggttggtttattactgattatagatggttaatgaactggaaagccgtgaggctcaaaacctccccccggtgcggtcggataactgtggggcggtgaaccaatttgagcc
>Skav206322
CATTTGGGCTCcaaaacgtggccggacaccaggacgatgtgtcccccagacagcTTTTGGCTCggattttaatccatcttctgcagcagaggcatcacatttcggtgcgccacatccacgcccatgagggtcatccatggaacgaatttgcagactgtttggcataccatatcaggtgtggatggtgctcatcacacccttttcggcactcatcagcttcattagcatcgcatccgttgcgcagttgggcatggctgattttgaatcaggggcatgatatacccagtttgcaggtcctg
>Skav211519
ATTTTGGACTCAccctttgtacgccttggcaggtccattcggcggtcgcaaagcgagcggcgaggacgtggtgatgacttgcggtcccgatgggttagttcataaactacgggattgtccaagaatggtataccccgaaaattggcccaaaatctactagcaatgatttttattggataatcattaccctatggtccatggcttttcaactcgacagcaagtgactcaagccgaagcgtattttcaaggagacaacaaagtacaatccaCGTGGCAATTTTGGCTCAgccaagtcggccaacggttcaccactgtgagtgcgacaaagtcgtacactgggagacctgcacaaaggatttcccatcgctgttgagaaaacagacaggcacaggatttccgcaaataagaggaaaaaacagactaactcatgcaaattgtactaacgactaattccatcatattgcacctacaccacattgcaccacttcggcgccaacacc
>Skav233253
GCCACTTTGAGGTCAAcaactttgcagtggccaagaaacatgtcagtgatgcgaagagaggaactgtgctcaagaaggcggacttcgacaccaacacaaaggatGCCTTTGTGGCTCcttcggctctgactgtgttcacgggaagcgcccaatttccgacggctctgtgcagcatcgacctgtcggcctctaggccttccttggctcgtcagttgaaggaggctgtggtg
>Skav206120
GTAGCCTTTTTGGacgtaggacacccatcatacacctttTTTTGGCTCcaacggggggagttatcaaccctgggtatcggtcatgagtcgcagtgcaatgctgtggaatcattggattttagtaccagcatcttgaagtaCGAAGTCATTTTGGtactgaagcggtgaagcagcttcagccgttctgATTTTGGCTCAgactttattcacttcttcaccgttttactagtgagagctttgcggtgccgcttagcctca
>Skav212736
TTGGCTCAAGtcctccagtaccagcttccagtgcctgttggatcaacctttttgttgcaatggctcgctccttcgtcctgactggtgccgtgctgctgtgctgcggtgcattcctcaccgcctttgtgcctgcccctcgcagctcccatgtgtctgctcctactgcaagcactggaaccgcagcagctctgaCCGCAGCCACTTTGGtgactccacaggcagcatttgctgatgagggctctgtgtggatccctgc
>Skav205990
GTAGCCTTTGTGGCacctgtaggtatgttgacaacccaaccggatgctcctatgcaagagttatcacgagtttttgctgcaggcatttgagacacattgaccctGCCATTTTGCCACAgctttttccctggcaac
>Skav235688
TACCCATTTTGGttgctggggatcgttccagttttactttgaagagatacggtgatgttttgttgaagcccacggttgcttcattggttcaaaattgcagacaaaccttgaagagaacattgcGCCATTTTGGCctgcaacattatcttcagtttgcattcaaccgccccgaagctggtgtgatgatgatgattgatggggtcttattatccactagtacagttttggcttcggagtgtgctcggttgattcatcaatatgccggtccaaagttgttgcggaaagcagcagacttggcaaagctttactgagactcaaagacctgcgcatggcggcgccgcatctgagctgtgcccgtgtgcattgaagcagtccgcgatattgctttcaagactaccgtcgagacgaaggtacag
>Skav212396
ATTTTGGCACAgacgttttcgcaattcatcaccatGCCACTTTTGGCaaacgcttgtgtttctgtacgtcagacaagtgccctttactagcaatccaaaagtgcaacaacccatgattttgggaagattccctcacttcccttacatacgttactggtgccctttgctgccttcagtcaactccctgcagtagccttgacttctatcccaactgctgccctctctgctgcgatttttgctgccttaagttgcttctttgctgccgaaaggcatcgttcaggtgccttgagcttcacaaatctcgataaaccgaaaagttttcagaatttcatccaggaaggtttccgagcatcatgttgca
>Skav206566
CCGTAGGCCTTTTGaagacaggcgcctgttcgggcgtcggagtttcctcttgggtgcgtttgtgcctttagatctggagtgacttcgtcatagccacttgccggcggacgcagTTTTGGTTCAAcagttgagctaattagatacccaattttaattgcaccgacttttccgcacaccccatgggtagcaagaagaacagcaagaatggcaatggggccgacaaggggcctgccaatggggccgacaaggccaatggatacaagaccagcccggcacctgctgctgtagacaagctgccggtcaccgtgctcagtggctttttgggtgctggaaagaccactctgctgcagcacgtgcttcacaaccagcagggcctccgcgtggcggtgatcgtcaatgac
>Skav200961
CATTTTGGCaaggactgagtccagtctcgccgcattgcaagtgagcagaccgttggttgtctcagcacttgaggtgattgtcgtattctgaaccctatcggaacttcgcgagattgcggtatcccaaagtatgcaccatgcacccaaaaCCATTTTGGaccacagaacgatcatgaatgattaggctgcctgcaatgc
>Skav233698
AGCCCTGTTTGCCCAAGcgaaatgagttattttcttccgagaaatgcaaggtagaaaggcagaatgcacatgaatgcacagggtttggagagatagagattccaaggattatggacaagttctctacagccccaccgacaacaggcacggcatgtcatttgatcagggagcattgccatgaaagctacatgtgactggttgagcatgagcttggactgccaatgctttccaaaggagagaactgtggtgatctgattggaaggtttgctctgacagggattgtaaccttgaagaggagtcTGGCTCAAGttggcacttgcggctgttccaacg
>Skav230724
GTGGCCAGTTTTGTCTttttggaagctctggtttctgactatcttcacctttttgtgtaccttaggggaagctgccaaccccggtccagaggttgcagacatcgccattggagtttcaaacCCGAATGGCATTTTGGGTAAGgcacacttgtataagaagctacatcgagccaagaccacaatttgggcgattagcgaaacccacctgacccaaccaggaaaggtcagatgcacacaagaattcaattgccacaaggcacagttccatgcacag
>Skav232481
GCCATTTGTCGCTGAAtccaatgatgtttcattatagccattatatataactattttatatcaccattatagttaaattagcattatcattatataaccattatctgccagttgttgagcggtgttgttgcctctgaatTAGCCTTTTGGCTCggactgcaaacgcttcaatcagcagagtgttggtggcttactttccttgttggatgcgtcatgtgtcctgcgagttgctgaagcgctaaggtgaaagcacctaaggtgcagttggctccaactggtggctgaacaaagtgttgaatcttgacgtttgaaggcagaactgggcttttcaatttggagtgttatgtgttcaagatccacgacattcaatcttcacggtcttcaaccttgctggcactcaggctctccag
>Skav233800
CCATATTTGGCTCtTTTTGGTCAAGatgctcaaggttataggctggaacatgtcattaatgagtctttgtctttgtaaatgagagatctctgcatttgcagcttcagctggtgatttgccaacagctggacctcccgtcatgccgtgttcttgtcgaccc
>Skav232776
ATTTTGGCGCAcccacgcgatcccatgatatcagatgtatggatattactgatattcccatacacccatcatgtttcaaatagtttcaatgcagtcatttggagtttttgcgttgtagctacttgcacttgggaatcattcatgcttcacaggatatgaggtatccaatctcttttggaacacctggagacttttcgactattgtcagggaggcctgggtcttggattgcttttcatgtccatagtgcttagaattctaagatgtgattgttcaatgttctatattgtttagacatttgacctgagggattggaatgacaacatgacagaaaTTTGGGTCAAGtgcactccaattccttcaaattgtcattgaatccttgcgcgtgcagcgtactcgacataaagtcctcagggtttcagaggttcaagcagcggtgctccagcatttctcgcagcaattctttgtggcaacatgcggagtgtctcggaaggc
>Skav220306
GCCATTTTGGTCAggtcctgtgagtgttggagggatcttgaggtatggaatttgcacacttcgcaacacaatggtgggctaaagtccgtttcatcgtggtcatggctgtaaaatttatttggtaagccattgaattacacagaaatgcccaaatcttatcaaaccttcacatggtgtacatggtgctctttttggtgccaaaaaatcgataagcacaagaacccatatcggactcgcgatggATTTCGGCTCAgatgctgac
>Skav202494
CCAGTTTTGGCACAttgcgtcgaccgcaaatgcgttcgaaagaaatgccttttgggtttaatcccaccgatgagtacactgcttatcacaacaagcttgctcagagaaccgccttgattctaactcttgccttaaagaatgtagtgtagagcagcctcgaaacagccgtcttttcctgttgcattgctataaaaccttggtccagctaggttgtgtcatcacccattttgctttttgcgcctttggttccggttttcacaacccagcaaatggctgcacaataaaccctggttggttgctttaggctgcaaatgtgagtgcggaccttcCCATAAACATTTTGTCATACAAGggactttcactaaggcctcagttagacactttgataaattgtgccgccccaatgcggcctcagtatatggtagggcccctcacccagaaaaacgagtgtccagctactcagccggctacccgctcaggttagtcaatgcg
>Skav205789
TAGCCTTTTAGGTAAAGtctacgacaatcagaatagatttgttcaattacctggcatcagtacagaactgcctggtggttgtgaacgtttgttattttcccaatatttgagatatttcattgaccagcatatactctggatggtttaTAGCCAGGTTTTAGGCCCAAGctacacacgctagacctgtcgtcttcccagggagagggcgcgaaaggggccccgaca
>Skav206115
TAGGGACTTTGGTCAAGgcagacgaaacgaagaaccgctgcctacacatggctagcagcttgttacaacggggaagctgtcagatctgcagaaaaacaactggccggaggaagtgttatcctgactaagctaaccctgtacatactcggcttttgacatcgcctgagttgggtgggatctggagtttgaacaagacagagcttcgtgtGTTGACAGCTTGGCTTAAGcgttgctcgatgctgtcgttgaaaagtaggtaacccccttggggccgctttgccgggg
>Skav229970
AGCCGATCTTGGCTgatacagcgcccaaagcttgagatgcaaataattgcaggtagctagttgcatgcttccagccccaagctgccctcgtggtgcttcactggggtatccccaaccatcaccaacatgatcttttcagagggTGGCTCAAGatccatgtttgaatactttagtgacttattctgccagtgaggctc
>Skav211356
CACTTTGGCTCAAGcaaagacgacccccctgaacacgtgccctggtgtgaagggtgatctttctgatatcgaagagacgacaacaaaatcttcccctaccgtgaaagagatacaggcatttctctttccaatgaagtgcttcagtctgttggtgttgtgcgtgaactacatgatcttcgaatcttctgccgcaaccgtcctacgaggtgggaacgccttgcgaggtgggaacgccttgcgcgttgttgagggacaaagcgcactcatgatcggccgttatcacgCACTTTGGCTCAAGcaaagacgacccccctgaacacgcgccctggtgtgaagggtgatctttctgatatcgaagagacgacaacaaaatcttcccctactgtgaaagagatacaggcattgctgtttctc
>Skav209185
CCTTTGCCATTTGGCcacgagggaggcaatcttgtcaacatctcccagtcctgctatttccacacagtccacacacacgcacacacgcgttgcgtatttatcatagattttacagagaatcattgtcatgcacaatttctactTAGGCATTTTGaggaagcgtacttccacatcgtgaagcgccctcctgtgactttgaaaagcc
>Skav228280
GCCAACTTGGCTCcaacctaaagccttagcaaccaatgaagcaatttttgcctgttggtgactttgtgtctcactgtttgtccatattttagcTTTGGCTCAAGctccgcc
>Skav213047
CCTTCTTGGCTCAATGGCTCAAGggatttcctttttttactttggattgtgttttggtaatggcaaaaacaaaaaaatcggtgatggcaggcaagagccaggctcgtccgtctgccctgaagaaaccgataccgcctgcccagagcgccaagtccaagaaacgaagccaggccgggaaagcaaaagtgagcgaagagcctagcaaagcttcgaagatccaggaggaggtgataaagaagtctgaagcagctgccagagaagaacaagcaaagaagaatcagaag
>Skav236223
AGCAATATTTGGCTCAtaaatgtttgggattgctggcatgttgaacagctcTTTGGCACAAGctcattccgattactgcatttgtggcgaagcccccacaaatactgcactctaggcacatgcatcaacttcgacccaaagacgcaatgagatcattgtgtttgcttcccaagcttggatggtggtcgggtcatgtcgggtcatgtcgggtcatgtccggtctacctccgaacggatgaagtgcatcgctgaggtgcactggacggagaacgcgtgacttacaacacgatcttgcaggagccagtagcttagtgctgctatgtgctgcagcaacagcaatgtgtagcagtggcattgctctaccgctgtgagatcaaggttcagtcgactgggctactggcaacaatcgctggatttgctctccgcgatgatttcttctcgggtgccgcccg
>Skav220169
GTAGCCATTgatttttgcattcatcttcctttatgtaaatagcaaggagccaagccaactccggagcagaccaattcagcgaaaaagcaaacgcaagggtgctgattgtcactatcgggcgacattaaatggtcacgtatccttgcctcacatactgggataacattacatttcctttgcatttcattgTTTGGCTCAgacgtctctgtacctggtGTAGCCCTTCGGGCTCcgccttgttactcattgcaataaggttagtctctgccggcccccattcatcgggagcgtctagctac
>Skav206775
GTAACAATTTTGGCTCgttgcaagtgctggagctatatcctagctctttgccaaagctaatttagattatggaggaatctggaaatgatatcgatgtgctaccccattcaagatctgaactttgggtacatttgaGTAGCCAATTTatatcatgtgcaaaccaaaagcgctggtctgttctaggatgtgaataaccacgtggtcgatttctgggtttccaggatctgtttagaggtgcagtgatttcaggacccggattgatccagcaagacccaaactgggctccaaaggattccaaatgtattatgatgattatcattgtttctatattatatcattatttacataaatgcacagatatctggtatatgacacccacatgtttttgcatgtctcgcagcacttcagggtca
>Skav231679
GTAGCCTTTGGTTCAAGcattggtcagacgatcatcgtccgcttggccatcattgatccccattggcgaaccaaccatcgtcattattgacagccccgaattgtagaaggcagGTGGCCAATTTGGCTgatgatccgaatcagatttgattaatcaacatttgcaaaccCCATCTTGGCTCAccatcatagctggcatagtgatcatcatttgaggcttccaaccacccacggcagctctgaccccatctgcagctcgccttgcttc
>Skav201524
GTAGCCATTatactacatattgacatttgttgatgtgatgccaatggcaaccgcggtggagcatctccttacactccagaaggcccatgagcaacagggcgctGTAGCCATTTcgagcgatgcgcggcagaaggtccaaggtccttagcattcaactactctgaagggatggtcggtaaaggggtgttcggatatgagagattttctggtaaactaacctggaagcaaaaaatcaccatttatacaggtaaaccagctatttctacggtggattttccacttccaggttagtttgccagagtgtagacgaaccagcataagcaaaaggaatcagaaggatctaagccggtatttgtctgagatagtcacgagatagtctgcgcataaggacaagataggataactggacagcattcaatatgcgataagttatcaatggactaatctacattacatagtatgatatatgatggcaaggtaaaagttgtgctg
>Skav229232
CCTTACCCATTTTGGTCGCAAtactgtcaacgaccggccagtgcgatgagcggtctggcatgattccgaagCCGTAGCCTTTTTGaatccatccgagtgggcaaaataagagtgtcggtgtgcaagctgatgcctttcgtctcacgtcagtgccagttcagttcagcatggtgtaatcttgaggatgccttgtccaagagatctttttgacctagagttcttgttgtcagtgtcgtacttgaagtggattcttgattgcatggcatgtccccagcggcttgttctcagtgaataggtgagaccgtgacgattgttcttagcaatcatggccggcgctgcgcccgatgccactgtgcgccaagccttcgaagagctgcagaggcgcttcgactatgataccaaggtcacagagaagattctggagttgggcatccggagc
>Skav212699
CCATTTTGGggttccctattttgagaaaccaccattgctgctgcaaggtaggatttgatcggatgcaatgtttgcaagttttttccttgagcaaagccatcgccgagatttttggatttgcccatgcttgtgtgatagatccgcgttgatgaaccccctgtaacagcatataaccagctgcttgatccagggctggattacaaatatatagatttcccattatatatcgcttatacacttatacactatacatatcccAGACATTTTGGCagctgacctcaggtgcgaacaacgagtcatgcacggagacatgtgtgcgagacatgcggagttttc
>Skav211741
GCCAATTTGACCCAAGtccttgagccaagtttgagccaagtttgaaccaagtccTAGCCAAGTTTGAGCCAAGtccttgagccaagtcctatataattcattttgcttttgaaccaggtctttgagcccagttgAGCCAATTTGGGCCAAatcctagaactattttgacctttggaccaggtctttgagccaagttgagccaagtcctggagccaagttgagccaagcccttgaggcaatttgagccaaatcctatagcggttgcttttcaaAGCCAATTTGAGCCAAatcctagaaatttttttgaccattgagccaagtccttgagccaagtttgagccaagttgaacc
>Skav230474
TAGCCATTTagagtaataaatcatCCATTTTGGgggttcccctattgcttgagaaaccacccggtgatgtttttgagccaccaactattaatcactacaattaatcactactagccagactagccagctagtaaccaccacacttagccatagaaaatcacgtgggtaacaaaagccaccaaggaatcagatgctcgttgag
>Skav210684
ATTTTGGCACAAagttagttgagtatcagcaccattgtgtttcgccagtcttttcatccaccatggctcgctccttcgtcctgactggtgccgtgctgctgtgctgcggtgcattcctcactgcctttgtgcctgcccctcgcagctcccatgtgtctgctcctccggcaagcactggaactgcagcagctttgaCCGCGGCCACTTTGGtgactccacaggcagcatttgctg
>Skav216691
ATTTCTGGCTAAAGgatgctaaaggtagttcacagtttctctggatgtggtaccctgggtctggcgaggcaagtgcacttgcatggacattcaataaatgcatgcagtgaccatgtcagtgattctgcgggatttcAGCAATTTTGGCTttggacctattcactcgcatgtgccgaaaacaaacagctcgttgttgcata
>Skav223856
GCCATGTAGGCTCAAGggcaatggcttcttccgggttggataaggtgtgtggtgtacaaagcccaaagcacattcaggcgattttggtgttctcgtagggatttttggtgacggatctcgtacgctcaaagtgtatacttgtactggatgatagtgagaaagagagatgcacaggcacaaggcaagcagaggcaggacatttgaagtcaagccgccagtcaaagatcctgcccgatccttggaTTTGGCTCAAGtgttttttcctgatcaaaaacatcaacatcaaccatcccaagaaatcctctaaggc
>Skav224305
AGCCATGTAGGCGCAgactcgcaacatggggacgaccctttgcaagcgcaatcttgtactgcaccatatGTTGCCATGTAGGCTCAAcccaagtccaacctcagtgcatatttctagttgctccatgcaacaaagtggcccaatgactttgcttcaatcaagccaaaagcaaaagaattggatggagatggcgaagaagaggttcttggatagctttctggagagacatggcttcgctgatgagtggagtcatcgaactgtgggtgaaaacagaaatgggaagatcgagaaggctcgaggtcttcagatggagtgtatctatcccatccacgtcgcagcccaactgggagatgtctctatcgtgcgc
>Skav232196
CCGTAGTTCTAATTGGCACAAGtgttagccagcaggaattgtgtttgtatcactaccgtagccattttggctcaAGCCATTTGGGCAAAAGccagtgggtgcgagatctccaggactacgggtcctgaggcagagcagtaac
>Skav228917
AGCCCTGTTGGCTtcggcatccgattgctcaaaattgacgtgcagtgtagcgtttttatgttcggcagccccgcagttgaggtgcactgatgcgagtacgatgtaagagaatggaatgataggtaacggtgaaatgttgcgattgatcataatgagtgggtttgaataaagatgtagcaacgacagctcatggcggcactgtttgaacctgagtaagaatttgccgagaatcctcagcatgaacaccagaccatggcgatccatgtcgaatttccgaaatggctgaccttTTTTTGCTCAAaagccgatgtgaccactgagcggagccgtttcgagtgc
>Skav227759
GTACGAGTTTGGATCAAGcTTTGGCTCAgtctgttccgcgtccttgcgagaaagatggagaagctttgcttggtgccagatgtcgtggagtttgcagctgtgcccctggagggcccatccttcttccttgagccctcagatggtctccatgactacactgtgaacactcagatcttcattgccatagccaacccgcaatcccaggtcggccgtgtgaatgaggtcttgggccagatctgcaagaagttggaccagaaaagcttgttgccagctcgaaacgacgagctcaccgtgcgacgcttggatacttcgcag
>Skav217405
catttttgcgcaaGTCGCCTTTTTGGAGCAAcaaccatgtgccgcgcgttggtaactctggcgccccaaggtggagccaacggtaagttgatgagctcacctatccactcctgtacgatgcatgcgtgcaatctcctcgagattcagtagtgttgagatgttgcggatttgagtccacatcaaagctgtgatgtttgtacgaatctgaatcgagtgatttctaacttccagcggatcgtttctaaatcatcatgaaccatcacggaatcatacatcatatcatagtcaagcaccatagtcaagcatcatattcaaccattcgtttcaagcagaatctccaaccgccaacccctgccttgggatccttagggcttcatccatggctggggtccaggggacgCATTTTTGCGCAAG
>Skav223051
CCGTTGCCATCATAGGTGAAGtttctcaggggcttagatgggtagtggcgggtagtgataggtagcggtgggtagtgatgggtagtgataggtagtgtgtatccacagaccggtgcgtggttcttggcgatggatctatccaagccagacacgttgagcagtatccaaaaccccacctgattcagcttgattggcaatcgggtgttctgctagctggcttatatgactttatcccacagactggaagtaccaaccagtacaagtagtgattatacaccctgaagactggaatcatcgttggtgttttctttgacgtacaggtctacctaccacaactggtaatgtccctagttgtgcaaactaactctctttgtatatgctactaatatgccatttaattctgaacttttctttaccatcatcagtaaCCGTTTCCTGTAGGCTCAAcacgttttgcgactaaactgccacatgcgcagcgacgacgaatttgcttgcc
>Skav201798
GCCCTTTTGCCCCAAtttgggttgtggcaaccatgagctattaaggaaacaagacaaattaggatggcagaccatgagctcttcttgagtgcttcatgacgcattgtgtggatatgttttttgtccgtctttcagattgcattttgatgtgcttgctttcacagaccaattctgcaaaCCGCGGCCATTTTGTGTCAAGtttgaccgacagcggttttcaacggtgggacctcggcaacaagtatcctttgcatcaagccatgttcggcggcgccccagagcaggctaaa
>Skav201657
AGCCTTTTTGAGCTgatgatgctggcccaactcttgcctcttatgccttttcGCCTTTTCGGCTCAAGcatcgacatgctttcggtatcgaaaacctggggaggacttccgaaacctcaatccccccatttccataagtgcagcacaccttgcgctgcagtgcccctgtcatgagtcatggggtcgca
>Skav214342
TACCCATTTTGcccagttccccatcacagaatcagatccgcctttgccaatagtccaatttgtgcgTTGTGGCTCAAGcattgggctttgactctcacaactgcatttgacccggacacattcgccaagcctttcaagtg
>Skav234639
CCATTTTGGgggtcctccattttaagaaacccccatattcgcacccttggcagacaaacccagaggccgttcggctttgtcaatgccaggcccagcacggagagtctgaggcgtgggcagtgggggtggagcTTTGGCTCAggcccatagggacccacttggatgtgcacgctcacggctcgcaagtggtcactaatcatggttgatagctaccttacagggctataagctaccttttagggcttaaaccgtagcgtttccggggcttagttcagcatgtccagctaccttataattagggtgtaaccaaccgttgttttttcccccagctccaagcaccacatccacggtgaccaggacgacaagccaagttgtggataatgcggcggtcaagcagttcaccaaaggggtttgggctcgaaaggacgagcgaatagaaggccatgcaggctttgtgccactaagcc
>Skav226305
CACTTTGGTCAAGtgatgacgcaagatgatatggatgtacatggatacgatatacatattatattcatggacggtatagactaattcaaagttcttgaagaggatcgccgcctgaccaaattgcgtcatggcaagtagtagaaccggctacagagcgtcgcttctccagggggagttgtcactcaatccaaggaattctgactctggatcgctttgagttggagcgtatcgatgagtatcgcatgcaaaggacaatgcatgagaatgatttctaagtcaaatttgcgcttggattccttGCAATCTTTGGCTCAAtttgagactttgctttctttgcgcgtgccaacgaagcaacgcgacactgccccacagcggctaatcttggcc
>Skav224103
AGCCATGTTGGagctgcatgctgtttgcatcgaagcaacccgctgcattctattGCCATTTCTGGCTAAGaggagcagtaacgcgtaaggatgtttgtgatgtgtacaggccccccctcgcagtagga
>Skav221271
TTCTGGCTCAAGcttcccaaagattgaaaaaacgcaaaaaacattgtagaactgcAGCCATTCTGTGCCCCAGggcacccctgcgccttcggattgctgatcggtgctggggacccgggggcgctgc
>Skav218710
CATTTTGGATCAtcgaacactttcgatctgggtcattcatggggtactctacccacaggcaatttccaatgatgccacctgaatctcatggaggtcatggactcatgtggaacttgaagagtcatctcaccgtgcaacGCCAATGGGCTCAAGcatccagtcctggttgcttcgttccgaatatatttctaaaggctttaccagaacccattgctggaaaagctgccaacctaacactccc
>Skav219812
GCCATTTTGattcctgcgctgttcattttccaggagtgtcttggggacatttcggctgcggccagtcaaaaggcaggccttttggtacggggtcgtttgcatggcctgatttgataggttcgtcatatcgggcgagattatttgtgccactgcctggcgaagatcgcatggagaatgttcagccaacttaaggaccgatgaagtcgatatctaagcaggtcttgttccagatatcgacttcaggcctcttacaagcccatcttgccgtccagttTACCCATTTTGGggtattttgggcgcag
>Skav207179
GTAGTCATTTTtccttgaagcagagctgctgagcggatagaaaggatttgatcaatccaggaaccagatacagatgtattcttgaggaagcaacaaatcctttgtattgaactaaagtcctcacagatgaatttcttccacctttgcatggctcTTCTGGCTCAAagggtgtgatccggtcttttttcattttttcgcggcataaatcgctgaagctc
>Skav233984
CCGCATCAATGTGGTCTCAAGaatgggccagtaggattggaatcattgcgacgtgaaccataccaggattcaaccacagcAGCCATTTTctttacagctgctgtcagctttgcgaccctgacgtggccgtggccatgaaatcagtctccattcttgaaccatttagcgaaacgtaccagtttgatCCATTTTGGgggtgcatcatctatggacaaggaaatcaggcactggtactggtttacagttctcaaaattggttttgtttttagccggagaatcgctccgttggtgcctgacctagaaatgccgcattcatgcaggactcacaaacaccattcacttgagtatggtgagtacggtacatgtcttgtggtgAGCCATGTTGCGTTGCAAGtgcgttcttgctggagattca
>Skav225635
GCCATTTTGGtgttttaggagatgggtaatttgtggatgctggcacctttgggaacctcatcatgtggttcagatcttggtgaacaatcaccacttagtaactgttggattttctggcaagaatcacagcccaatgattggaatCCATCTTTGGCATCAcgaaagctcggactttcatctgcagcgcttgcagccaagaccctcccgtagctcggcctcacc
>Skav232947
GCCTTTTTTGATCAAtgttgagcccacacctgctgccagttggtgagcgtagatgatgacatttccaacctctcttctaaattgcacttccatggttccctgaggccaaaataccaaaaccgtgttttcctttcgaacaaatccttcctttctttgcttggcatgattcctgggcagcgtttcatttgagaaggcggtattcaATTTTACGCTCAAGagccaatgacactttgagacacttttggcataatcaaacttttgctatgtcattttgttccttggtcccacgttgcattttctcggacttgccgttgctcaagggagaagtgtagcctgcctaagtggcagctcagcggc
>Skav204003
TTGTGGCTCAAGTTGTGGCTCAAGcagttcccaattcca
>Skav223845
GTAGCCCTTAAGGCTtgagaaacctcgatgtcacacatgtatcttatccataattatatcatatgcccttctatcacagagaaaccagcttgcttcggggtcaagaaTTTGGCTCCAGcctcccgcatgcagcagctgatcgagctgttgcgcgagggccgactgtggtggagcaatagcagcgactgcgtggggctcagctggccaggtgctttgcttctggtggtgatctcctggtggcttggcatttgtgtgggcttcgttgctggagctctcctattttcagctggctgccgtcggttgctggtgctctcactgcaaactgtgatcagtttgataggacctggtgcgggagtcttggttaaccctggggctgtggacagccgaactaggctggctggttacagggactaggtgc
>Skav205859
TTTTGGCTCgtacatgcgactgccagagctattggtgttcatatccaggggccaatcccatgcggaagatgtggcttggacagcaatcttggatggcttggatatgctgagatatgctgagacggttttctgcatttcctcttccctacgctgtttggggtcgccactgtaattcttcgtagtgttcaaccttcaatttctttggataaaatggattgtttctccacttccaacgcttccccatcttgcacggcccatgtcaatttgattgggcatcataggggcaaagtaaattttgaccttggccttgaacgtattaaaaactatccagttttcacccaaggtttgctctcatgaactgCATCTTGGCTCAAcagcaagtgcacaccactagcgcagcgcaggcaacgattcaggtggct
>Skav215427
GTAGCTTCATTTTGGtactgttagaaaactaggttagaattgtttagtaacagtgttagatgggttgtaggttgagttgatggggactgcatttacatgaggtctgtggtgcaatgctctcacaattctatcatgatcatgtgtacagatcaagaactgcatcaatcccgaaccgcggcactGCCACTTGGCTCActagcagggcgcctagaccataaaatcatttccttcctgagttgtgtggtgaccccccaaaattgccgccc
>Skav235015
CCGTGCCAGTTTGGCTCAtctcatcagtgtctggcacatcgccaccttcacgagggaaaggcacagaagaagcggcagcagagtagctcgccatgataccgcaagtgtgaggtacagggggttggtttttcaataccagtggaacactgtctcacacaagcgggcttgagccaaaatgtccgGTGGACATTTTGGTTCAAcattccaaacatatgacttgcaaccgcaagctaaatgcaagtatcaaacattttgagttgacggaaggccaaaaggaagacgcagtgtcccaaaccaaaaactacaaccgagctttgaacccttaaatggatccatcacgatctgggcttcaccaaatcttgaagaacccaaaagcttcgacttcgacttcgataatcatcgagctcagagctccgtgcctggagcgccaaaatagtcgttgatcgttttcgctaaaacgcca
>Skav220514
CCATAGCCATGGTGGtacctactaaccatccaagaaTAGCCATTATGaacagggcaaacaccagtgacttcatggctttggacaacgatatgccggccaatatttacggccccgagcgtaactaatatccctgaaaaaagagtatccaatggattttgcgatcgatgcttggTGGCTCAAGattagcagggcaaaaagattcccccttgcggcttccttggaaaa
>Skav204940
CATGTTGGCTCAAGtgaggcacctggctcaAGACATGTTGGCTgtagcagccagcacgtgagcctgtaccttatcctcgctcacttatcctcgctcaacgtacgacaaggatccactgatcatgagattctttggatcgattctttgggctgccagtgctgcctttgttctcagcggcgatccaacagcttcgcaaggcacctgcagtgatgggtgcgacccgatggatgaagtagcccactttcagataggcaagcgcgagacggacccggaccaccggctcctccagaaggcagagaaggagatgcccagtggtggcatagagaagggtggcatagagaagcgtggcatagagaagggtggcatagagaagtgggatccaagcaaaaggtggcgccggcgccggcgccggcaccatcgccggc
>Skav203356
CATCTTGGCTCtccttcagatttcatttttcacgatgcacgtgtttgcatattatgatgttgatgactcGCAATATGTGGCTCAAagcatagtccttttgtttgcggacg
>Skav216623
CCGTAGCCATggtaataaaccatccattctgtttttctctaccctaactggtagttaccccaattatctccaccaacttaacgtttatatctatcatcactatccagaactggtagttccccagctgttatgtttgccaactccccagcttgtggtaaccatccatgtgcgtgtttctcaaaataggggtacccccgaatcatctagttatTAGCCATTTTatagtcataaacttaaaccaaccattttttgggtcccctatttgagaaaccagccatgtgagcgaaaaccgaggcgagatctacatcctttcgcctatgaccaaaacgggttcgctgcacgagctcggtggcggtgtgtggaatcgacccgctgccagcttc
>Skav222992
CGTAGAACATTTTGGtcccgcttattcggccagctgtaaaatatgtcttgggcagctgtagcccttgctggtagcatgctggttggcagtgactacatactGTAGCACTTGGATCAAGccaagagaagtaagcgtagcccgcaagccatccctgtgccatagcccaaaacatgacgaaattggcgcagatcagtgctgtggtgaagccttccgtgctcgttgccttgggactcttttctctggtgagtttgatccgtcgc
>Skav224896
TTGGCTCAAGccAGCCGTTTGGGCTataccacttagctggag
>Skav204453
GTAGCCATTCTGGgctgggtagccagacatgagtaataagcaggggcaacatggagagtattttgtggctgttggtatcccgggatttgtatggatttgtcgggttatcaacagggcttgcagatttttaaattgaatttgcgtcaaattgagtacccataaatcatccaaacagatgacgtcaaatggagactcatgtcttcatttcctcaacctgcatcgcttttataataatatatcaattaacacaatcatgcatgtagcatcactggtgttcggCCGCATCAATCTTGGCTCAAGgttgctttactctggttttgccccaaattgctgcaattttctat
>Skav218526
CGTGCGAGTTTGCCTCAAcgatctgatgaaacagacgaggggtcttgtttgtgtcagagacaaaagcccagggtcagtgactggtcgcttgggacttgggatttggtgctgccccaagttctcaaggttgcccaatgttgtcgttctagctggagCATCTTTGGCTCAAGtggcagcaaacaagttgccaagaagatgaggcgtttgggtgctttcactgcgcaaaagccggtgccaagatgtgccaagtttgatatttagacatgtaagagtgtatttaaaagaccactgtttgctttctttgcttgttgctttgaccgtgcttgagtcattttaagctaatgcctccaaagaatgcccaaatcccaacaaaacacgccgaaacaaatcatagggacctcgccacgtgca
>Skav218334
AGCCATTTGGCcgttgcatgcctttacaccttggcgattgcgccctggTTTGGTTCAAGcttatcttggattatgaagttgcgtagagcaaattgattatgcatagcaacgctgacatgagaagaacacaacgggtgatctaaaattacaaatggtcagtttgactctagtaggtagcacttgggcgttataatcatttgcagcatgaattgggaattcaccatgtcagattgttcatcaccgtgcaatttgacttgtgattcccgtcaaagctttgcagttatacgattgccggacactattcccacagcaagtcccaacaagatcgatgacttaacatgccttaagcagaaaattgtcagtgaaaagattgctctttttttgagacttgggatgatttgtattgtagtgttttttcaacttcaatccgtctagcggtcagcaagaactacc
>Skav235036
CCGTAACCATCATTGGCgaagtatcattacagcaagcatcattagcaaattgcgtggtgtctCATTTTGGCTCAAGcacagatagatggattttcacggtcgctgcaactatctcaggttgtcgcaatgtgttccgtgtcctgggcagtgtcgggcgaggcgcttgcagttgtggaggaatttgaaggcaagactgcaagagaaatcaaacaaattcttgcagttcaggtaggtgtcaccagatttcggctgaggtttttcttggaagctggatgctacgaaattcaagacgatgaggtctttgcttccgaagtcaaaattcagctggtgctcttggagttctggctgcctgatgcactagaaaatcaaaccatgatagttgcagccaagaacaatgattccgcttgaaacgcagctccaaaagcctcgcagtccagcttc
>Skav223876
TAGCCAGTTTGGggaccccccagttgtcatccaccttattgaccaattaatgaaacaaCCATTTTGGaagcccccaattattagaaaccaccatccccatgaagcggaaacacttgtcgagccatggtgaagtcgagactggaagcttctcgacgatggatctcgaagtggtatgtttgacgggcgaagggctaaagctgaaagttcatggtggcactctggggcgggaagtttttcagatggtttcgcagcaacttccagcgagaccaggtacaagattcgcgctgcatcacgaactatctaagctcattcttcaccagaccttagaagaacaaggcatgataagaggatgtgaagctggctccttatcatgcacgcgagtgccaacagatttgcgcgaagcaatccgatatgtctacgggcacggcaatgatgagactgcattggaaggggtcacatcgctg
>Skav228347
CCGTATGCACTTTGTCACCAGcaattgccgccaaatgtcggcaatcagcatgggacaatccgagccgaatcatgatgaccaaaccagaatttttttgtcaacatttttttgggaaccaaatttgtatctgttttgctttcggggggcgatgtggttgccacgtgtttcgcatcaccttgcctccatcgtgcacacacggggtcaggaaatctatcgggtaaaatcagaagtacacggacggaacgcgttggaaaaagttagtctggaaaaaatgtttggtgcatgtgcaacattgagggaacaaaatcctgatttggtctcccgaTTGGCTCAAGgtgctcaaagtggcactgttgtgtaggcttcgcgcgttcgggtctgtcgca
>Skav202590
CCATCATGGCACAAGctgacgccgaggcccttgcagcccttcattgggtgaaaggttttcgcattcgtcctgatgctgctgggagccaaggaggaaaagtttttccacgccatgccattgatctgtaatgagttgcatctcattgctccatctttcttacataatctgtttggcagggagagtctctgcatttgcagattcaaaacatgctgtgtcaaatctgtgtcaaacagattacatgaatcatgaatttcccagcaaaagcgtcaaagggaggtccagcgtaccaggagtgtttgccacttcCCGTGCCATTGGCTCAAacagcgcaaaagttctcaaagcatttgcgacccactgaccttttcagcttttccttccgtc
>Skav200402
gtagccatTAGCCATTCTGCCGCAcattcacagaacaggattcgtgacgtggctgctgcaggaagctggacttcgggtgattcttgcgtgccgcaatgaacccttggcccagcaggccgctgctacgttgggctgtgagtacgaactcttggatactcggagcgtgataaaatggggcgagtaggtgactctcccaatggttctattcccaaccatctctgcttcaggggttaagaaccaaagatcaatcatcaatctttgctttatcaggacttagggtattaattaatgaccaccatcatccaaatgcgaccgataccatgtgatctgatttccccatccgaaaaatggagccaatcgaagggtcaaagggtctggttctctcaggacttggcttccaatgcttccatcgacgcctttgccaagcaGTAGCCATT
>Skav207600
GTACCCAATTTTGGgaaacacccatctgttcagaagtggaagactttcagtcatatcgcacgacgcatggctcacatgtttcaggttacgaattgatttcttgtccaacaggtgatCCGCAGCCCCTTTTACTCAggccgtagcaaggttgtaccagttgagaccaggtatcttgttcaaaccacacttactggattgcttgtcgatttctttggactaaattccttgaatacatgctagttgccttcaaaatccacagagatctgaccctgaatagatggatgtgacatacatacacatagaatatacatatacagtattcattcttcatacttacttatcatgattttttgcaagcagctcatagattgatcagagtgtttggtactatactctgaagaatttgaaatggctccacagaacaatcgctggcaatcgctggagca
>Skav222923
GCCATGTTGCTCGAAGatgaacacagagcctgttgtatgaagccagccggaagaagccaaccggaaggtctgaggcgatactgtaccagtaccaagcagcctcaggtcgaagtcaccaaaatttcatgcagttcaggcagaaatggatcaagatttggcgcaaagatctttgcacaccatggatctgctcagcCCACTTTCGGCTCAgccccggcggaagctggacaacccaggaggacg
>Skav212765
CCGTACCCATCTTccttttccatgcatcgatctacatcgcatatgccgatgttgcaacccgagtgccaaggtcccatggtggggaactgtttgacccttcggcgactgggcccttcgcggcaaggaagcaaggtgggcgatgaaatggtgcttccttcgccatgcttcatggtaggtggaataattcgtcattggcacttgtcaatggccatcaatggcctgcatccctagtagattttcagtgagcagatacgctaatatttgttgatcatgtttgatttccgcgtcataatggcccatgaaaatggttgagacttgagggtaccagggaagggggaaactctggtggtctccttggcaagatgtgataagagccggctgacagtctgcagctggcactccatggggagttcagAGCCATTGGCGACTCAAGgggcggcgccatggcgccacagcag
>Skav233906
GCCATTTATGGCcacaatttttgaaacatttccctgtgctcgtggccaatttagaatttagatgatccctactggcagctagtaatcatagcaacttttggtacttgctcaatggacttcgtcataaactgcgatctgacacatgagcgaagttgcaggtggatcgatcacagaaaaggaatatttggagagggctttgagacttgttcctgggcaagaggagattgggcgacggaggtttgcagcttcgctgcgatgttgttgacggaaacatgttgagttgatgattgcaaacggtgtcacaaccctgttccccagaatgtccccgacagaatcttccgaacacgatgaatctcaccattcctcaccacgatcattgctattcatgagccatttctcaccatgaatctcaccatttctccccatgagCCGTGGCCATGTTGTGGTCAcccc
>Skav207404
CATTATTGGCACAActtgaaggagtacaatgattgtctaccgtcatcgctcgcagcctccttttgtgctcattttCCGGTGCCATTTGTGGCactttggcacttgggtcttcttgcagacaggcaatgacaggcatactgtctacaaaatcagaggtcctgaattatcactgcagcacttcaaacacttcaagacaatggactagatattgctgtgccaaaatcttcagccttgccatgcacaggcgattctcgaactttctttcaaaaatccaacaagttacctgtgaacgcggataagcaacgctcgcatgagatacccaaaactgctccgaaaccgttggcgaagtcaagccaagatgccaataaccacagcggagatgatctttgcatgatgcctttgtgacagcc
>Skav217090
CCGAAGGCTGTTTGGCAAAAGggttcggtgttatgtttgaggtcatcatttggactagtaacaacttcccaagagtatagccaggtatttggaacactagtagtaagaacttcccaagagtaTAGCCATGTATGGCcataaacaccttggtccatctctaaacagcatttgaacctcgatggtcggcagctgatcatttttccca
>Skav232607
GCCATTCTTGGCgttgtgctgacatcgccaagtgacgccgggagcccttggggactccggtcgccgcgaggaatttaagactggcaatcccaagctggtggcgaggctttctgagccagacgctatcaaggcgcgcgcagggagatccaccagatgccttgtgagatgctgcaggtggagggtgatttttttttgaaattcaccaccgccgttttgtagctgcaaagagctgatttacttccaaagattggagaatgtgcatctccgattccctcaagtttcatggcctgaacccggagcatgatcattttgggtgttctctggaatggagtctcaatagccgaaaggctttcctgacgaaatcgtggaatattacatcttcaagtcaagtccatcatgttgcatgatctgcagTTGGCTCAAGcaattggcccaaattcaaaccttaaagaccaacgacttgtgtggtcttgcccgccaagcagctcccgaaagc
>Skav201576
GTAACAATTTTGGggtggttgctgccagacgagtgcttaccatacttttttgccgagccgcccaaacgtggatcatcaacccccctgtgatcagccgtgtttcgaccaggagcgcgctgctggtactaggccatggcctgaccatgccatgcagtgggggacccaggattatgccaggatgtgcttggatgtggatacagtttctgtggcatcatctcatcatggttcactcaggagccgttcgcccaaagctttgtgtggctcacagctgtaccatcactgccagctgctttgttgggactatgctgcctgtttgggccatcatgctggtgatgcctgcctactcccagacttggcaaaaagtgaggaccacaacgctggggatgcgggcacaCCATAGCGCAGTTTGGgttgacagtctcaaaggg
>Skav215659
CGTACCATTTATGGttggcataccatatcatgatatatagactattgtaaatgcggcttcagctatagaaaacagacaggttatggaccaaacttgatggacgacaacatcagcaatgaacaattgtggaaagatagtgggcaaaatccctttggggagacgatccccaaaccagtggacaagtggtatagaattcccaatttgggttggttgagttggcatgggcattccatggcattcccgtcatcaagccgactggaaatcaaagtcgcgcaagcgctccatgattcttctcacaaactcggagcaaaccaatgcctttgcatgcatgttttgtcaggattgccaggggtggaggactggtaggagcacaagagtccttgcatcgagtgcctgcccaatgcaagctccattttgcTTTGGCTCAAGcgcctttcgagtccccttgactatttgaaacagccgtaggtttctctcagataccggccgccagc
>Skav226439
taGCCATTTTGtagatcctatgttggttttttgttgaggtatgatggctatttggtgggttacggtggctctctcaatgctatttcatgtctttgtaatgggttcatggtgggaagactgcgccttaggcacaaggaatgggaatgaatgggatatatatggttctatgcatatgtataatatttgtttttcttaggaatacctggccattttgtagagcctatgttgattgtttgttggattttgttgagtataagatggcttaagatggccattgtggggctttataatggctatatatgatgatatatgatggatttttgatgggaacactgcgctttgggcacaaggaataggatatacctatatatactagtatatatatatatatatacatagtccatgttgacaccagcctgcatcctaggtaggctTAGCCATTTTG
>Skav227817
AGCCATTGGTTGCTCAcattcatcagatatttgattcaagaatccatgatccaacccaaggcaaatcatcttgggtgaggccagccctggttctattcacttgggctgtcactcttcgggagggcgggatggtttcaatcttcctctttcctttgaaggatactctctgatagtcctagcatcgcaatgaaaaatcaccaaattcttgagagtaaccttgggaaactatcaacTGGCTCAAGcatcattcattgcatcagatcagacgccagtcgttggttcctgcc
>Skav215993
TTTTGGTTCAAGcagggggggcagGCCCTTTGGGCTCccccctcttgagccaac
>Skav234088
TAGCATGTGTTGACTCAAGactccgaaccatctggtattttgttcacttttaacaattctttgtttggcgcatgggacgacgtgaccaacgctcacaggaccaaattctgtttgtacttctcctggtcaagatttTATCCGTTTTGTCACAAttcttgattcctgatcgtcaattccttttgacctacatttggatatgtccaggaatagggcatgtcccaagcactccacagtgatccttctaagccgggaaacatcacttgccaacgcatgcgtttttgcgcctgaaaagtttcagttagcctgctcagctgagactgagtcagatagactcagt
>Skav201705
TAGCCACTCTGGTCCAAaaCCATTGTAGCTCAgggtgcagtggccacccgggggcaggcgaccctgatccatcagggcgtctgtcgtcaactaagctggcttgccagctgccactttcgtgtcctcttgagttcttgtgcc
>Skav203039
CCATTTCGGCACTAGagacgcctggccaaggagcaaactgatctgagtgctttacagaatgccgaggaagtcggcaatcggagttggatggttgaacttggttaataaatgcatgttggtggtcatttgtaatgaatcgaacttgattaaatggctcatagcggccagcaattgccagtccttgcagacaagaccatcgtcaaagaaatctagacatttcaatgtggagatgggccaaacagatggaatggttttgttgatgGCCTTTTTGGCTCCAGaatccttggtcagttgtgatgatccgatggccggtcaggaacggtcacgctcaactcacttcagtgtacattgctgcgcgttttttttgtttcatggggagtttacttggagcaaagggatcattgtgtgagctggccggagttgagttggctcacaagactagtttgctactgcca
>Skav233046
TTTTGGCTCttaccaatcaaccaccacgactttttacagatggtagctgtcaatttccggctttgccaaccggccggtatgccagctttgcaatcattctcgacactgctgcttcagaccaggagcgcattgaacaggttcatagatatcatgccactggccagttgccccaatccctccaaaccctttcaaagggccgagttccaggccgacaagatatacatagagctgagttattagctcttgtgcttatcgttgaaaattttcagcaggctatctttcacacagacagccagGTTGCCATTTCTGCCTtgcaattagttcgggaaggatcttttggtgaccttcaaaagcatccggattttgatcttttgtgtcgccttcaacactccttgaaggactcgcatcaggtttgcaagatcaaggcccaccaagaggtccctttgtcg
>Skav225406
AGGCATTTTGACGCActgcctactgcaggtgggagcaagggctggaccctgtcgctgcgggttatagtgggtgtggttgttgggaacaaaggattgaacttagctaaagaatcctcttgaaattccaggtccagaatggttcgcacccagccgaaagatgttgaaaggatctctgggagggtttttatataccagatataaataTAGACAATTTGGCaggcaaaatgattcaaaatccagcgttgaatttactcctgcgtgttttgcccaagttccaaagaagtgttggcggtcctgaaggacaatttattgcg
>Skav234327
CCTTGGCCATTTAGCCCCGAGagaggtatagtcttgtgaatatatctctcagttgtgctacttccgcacgcaagcaaatcattgcgcatgtatcgtagaaattcatggacaactggactctttctacttggcaatgttccacaatgttccacagtcatcaacagttcacattgtgtcgcatgtttcatacttgtactgccttcggtacttgtGCCATATTTTGTCAAGggcctgtgactgtgagaacgccatgaccccgcgagtgaagaactctttgttcttcaccataaaggatataaaggacagctctttttcagaagcagagaagctcatcaccaagtccaacgtggctgcgttgaatgccaggtataggccaactgatcagacc
>Skav205577
ATTTTATCTCAAGgtcaggcacaagctcgtagaagttggcagtgatgaattcatattaattcaaccgtgcagttttcagtggaggttgcccattgcttcatccttcaggtagtctcaaagcatccttccagcaacgctctgtgaagaaggagtaccgtgcaatcgttgcctcgaaagcacttatgccttggatttctttgttccgcgaaaggcccagaaggatgtatagagaaagtgttcttagagttccCCCTAGCATTTTGagaagagttCATATTGGGTCAAcattttggaaagactcgccagagtgag
>Skav214293
TTTTGGCTCAgtaggcctggaatttttggagcgacaggggttgataagcaagagcaatgcatgagaaataaagcaatgaggattaagaacagggaaaacgaatgggtaagaaaaatggttgaggatgggtttatactgagtgaggtagcagcctgctacatatctgtggctggcaagattatgatgcagaaatggcaacctcctgacacggacagactttcacggtatcagctgcttgagcaacgttgattctggtattgatactgaggaaatctacgaggcattaatctatcttatacctgaggctcaccctcttgcttggcgagaaaCAATTTGGCTCAAGcttcactttttgcagtcgtaatgacttggatttccgatctgcacggccaatacgaggcagcc
>Skav202392
GCCATCTTGGCcttgacctcaccatggacacccacaatggaatggtcagtccaatgtgggtccaaacaccaccccttctctgatcaactcctacaagatatccggatgaccttgggaggcaccgcctccgacacaccctcagaaggacaaccgttttacttggacttgatccactccttggccaaacgagcacaagacgttgatacggattaccctctccacctccgcaagggggtgccgctgggagtcactgatccacctttgctctccccgggagtttggccactcacttcccccaggtggactggggcttcgtcttcgttgacgacttttgttggctccttcgccaaaccacatcggggacgatggcgacgGCCATTCTGGCcactctcattgcattgggaacacctctcagctggaagaaaacccacttggctgagatcaacacatggcttggctttgtggttcacccgaacattccccaggttcaa
>Skav222713
GTATCCCATTTGGCTttaaccccgaagatcctttcaccaaatatcataacatgttggcacttcgcaccgcaatgatccttattcttgctgtgaagggtggttcctttatcagtgtcgaacaacctggtggttcctgtctttttcacatgcatttatacattcagcttgttcatcttggatgcattatcacccggttttgcttttGCCATTTTGGGTCtggttttaacaagccatccaaatggcttcacaataaaccttggttagcgccactcgaatgtaagtgcacttgcagacacaaaggaaaacattttgtagtccaagggaatttcacgaaggaaagtattgctgaatttgaccgc
>Skav222826
CCATTGCCATGTTAGCTtaccggagggtacttgttggtactttgatcatggctagtcgatggctgatgatggttgatgagacttaatgatggttgaggtcagtgatggttgatgatagttagtgaatgtggtcaatctattgtatttgctggtCCATTGATGGTTCAAGtcttcacgctcgaaacaatggtgcacccagcaatggttcctattggccatcactgaacgacccggatgaccg
>Skav216759
TAGCGTTTTCGCTCAggtgcttcccgacgacctgctgttcatgatgcctgtccaTGGCTCAAGggcggggccaggagtcttgttccgccccttggacatgatcgattctatcctccaaggggcacctccggcactcttctttcttctcttccaaagcgtctaaacatgttggaccgaactcaccctttcatcaaagagatctatgctagaactgcaacggtggattcagctaagaggcaatcttaacttcaaggccatcgaaccagcggaagcgaatctgctgtgcaaaagCAATTTGGCTCAAGattaaactcacctgccagtgcgcaacacgccaacttgaaagctcgcacataagcgaaagccatttccccagtgtttgacagccatatccTTTGGCTGAAGaacttcattgatgatgatggaaaacatcaacggtttgcacaaacggttgtaacatagacttgcatcgcc
>Skav214873
CATTTTGCCACAAaacattgccagggtccatgtgattgcctacaaagcatgtgaagcaaaggccatggattcagatgatgctgggagcTGGCTCAAGtacagctacttgcatccatatagacaatagatttgtttaaattgacatcacatgatcttgctgtttcatggttttggccactttttcaattgcatctttttagtaatgatgacctcgagaagggcagtggccatggcagcctgtgcggggatggttgctctccacctgacctttccaatg
>Skav206593
GTAGCCCTTCTTGGgccagaaatatcagaaatctgattcgtggagattgatcttgggcactgaggtttgccagaagatggatctcttaatcttgcttgTTTTGGCTCAAGggcgaaagaaccgtgaacggggagaactcaacccgcagtcgaccgtggtcatccttaggactctgaatcatggcatctttcgcaccagcccctgagagacggaatcgctccgccatctccgtgctcgcatgtttggcagtgctgggtgccctttgccagcttcaggtctctccagagccagattttgtgtctggcgtggccttgcgcggatctggacgtgccagcctg
>Skav232982
GCCATTTTGcgacccacttgcgggtggcccaccatttggtcccatgccgagctactaccggagggacccacaacatgtgtttttccagacatcttccaagatatttgtgctgattgaaattgtcggccccaagtgtgacgttctgatcagtaacgttgtcagacttctgattgctgactgactatgataccacaatggttgtcaaactGCCATTTTGatgcaatatgagatcagctacttcaagttccaggacctaagggaaaatttgtggtcatGCCATTATTGGCTtgggtcttgtcaagaaaacaggtggcaagaaggaatggtgctgctgaatatgttggtccatgttctcaggccaagtttgctgaagtgttcaagccttgcagtgccagctgtgcatc
>Skav236062
AGCCATTCTTGATTCAgAGCCATTTAGGTTCAAGatcttcgagaactctccacactgacttcttttgaaatttggagcatccaacttgcttgagcc
>Skav218647
CCGTAGCCATCCGTAGCCATCCGTAGCCATCCGTAGCCATCCGTAGCCATCCGTAGCCATCCGTAGCCATTTTGacagcagctttagcag
>Skav207552
TAGCTATTTTGGttggattcggccatccccttatcaccaagtatccccatgccgaccaaaaaaagttaggacctgggagcttaaaggttggctttcagccatcagtgttatggccaaggtgatgctttcaccaccaaaaatactactGTTGCAATTTTGGgaaagaaaagctgcaccagctgacgcaccagtgtgatcacttgctgaagcctgagtgactctcatcgcactgccaacctctgggctccagggatctgccaacctcaaaaaattcggcccctcgaggggcttccgggacgaagggtcccgg
>Skav227631
TTTTGTCTCAActggaaaatgtttgcgccttgatgttgcagattccggccgctggcacctctcagatTAGACATTTTGctacctttggatatgtcatgcttttgctt
>Skav216434
CGCAGCCATGTTGGCCCAAagttctcctagagaacccagagggtcattCGTAGCCGTTGTAGCcgctgtagctgtagccgtagcccagtccaactttgcttagccgtttcctcggtc
>Skav204789
CATCTTGGCTCAtctaggctCATCTTGGCTCAtcttggctcaagcttactcagacctcattttgatgtaactggtgtggcccgca
>Skav202374
CCGCAGCCATTcagcactgatatttaacatgactgagggagagcagcaggtcattccactcgcatcggacttgcacaggtgcgcctgcgaaagtcattgccttaggatcagccaaaaaatactttcagtgcacttggttcgctgagtgatattcgggtaggtttatgggtttggaggttcaggtacgccagccaggacaagaacctcagttcttttgcatgaagactttattgggaggcttcactgtgttatcagttgctcgtaatttttcaaaccgtttgaaactatatgaagctatacccgtaggcagccttagtgatgaattggtcaaccagatgaagttggtGCAAGTTTGGCTCtcgcttgatcaggtgtgacacaattgcccgggaactctcacttggcgacggggaggacaaggcgtttgggtgcttgaaggctcaaggtcggaagctgtgccccgccagcacccc
>Skav221068
CCGTAGCCGTTTTGGGTCAAGcctcttgcagtctttgccagaccaagccttcaaagctccaatctgtgaaagatcatggccagtcaagatcaggtgattgggttggtggcttccgagtgcaacaactttgttgagaacttcttctccgaaaattgcccaacttttggtggcttggagaccccggatgtcatgaaggcggaaccaaaggccgaatggttcaacttgtaccagaagtttgaagcagaagcggaactcaccatgcagaatgcactgatgctttggggccttgttcaagcaaagacctttgaggAGCAATTTTGGaggaggcc
>Skav209423
ATTGTGGCTCAActtcaaagaccctagtgcagaagaagccgctagatgactgttgggctcttccaaagctgcccatggttcaagtcagagtatgtgtatggaagtgtatgtaatcgaatcggcttttcacactgctcattgattttgggatgcgcaaaagttgaacaccaaattgttcgcaacctatagccgcaatggatcgcaatggaaacaaacgattgttcccaagctttcctacacaatgagaaaggcatagtgatgctacaatgcaactgttgaAGCCATTTTGaatctgcatttgccgcaCGCAACCATTGTGGCTggacaca
>Skav233082
CCGTGCCATTTTtggttgactggctggtggtttggaatttttgccgtcaacctagatcaccaccatacttgggaagacttgttgaggaggtgatgtgtgtggacccggggtttccacatatgtacgtacacgagcgctatccatatcacatcatgtcatatATTTTGGTTCGAAGttgcgtagctgcatcgatcccgccggggcgacgccggggcgaaagc
>Skav215769
CCATTTTGGCTCAAGgccaattggaggattccccaaatttaagtggggtGTTGCCATGCTGGCTgggttgcttcccagtcagacgttgctcgatggctgggcaaccgtagcagacgcctcagcatgggctggggtagacgaagggctgcggagatgtgtcttccgtcaattgggggacaacaacttggatagtctggcagttctagctatggtgccttctagtgttttcatcgaagctatgagcaatgctgtcaggggatttagacctctctatgaaactgagaaagcacgtctactcttg
>Skav232687
CCGTGCCAGGTTGGACTCCAAGtgcgaggcgctctcgtgcgaggcagttggtctcgccagttggggggcggcacggtgttgtggttatggttactggttggtggcttgaccatggtcaatcatggccaataatagggccaataataagggataataaccaacaatagtatacaatagtggttaaacaactgctggttggtggtttgattgacatttttttcctagcagttgataacaaatggttggttgattaaTAGCCATTTGGCTCCAAGaccgtcctgtggtgtggtctgtcactgcgtggagcagtgctaacggagcc
>Skav212111
CGTAGGCATTCTGcgtaggcaaagtcgcgtaggcatctcgcgtaggcaacatgatggtatgcatatgcaaaaaggagctttgattggtctcgcgtaggcgacgcgaaggcaaccttttcacacctaccatccgcgtaggcaaaacccctggtaaaactacatcgcgtaggcaccgCGTAGGCATTTTGcgttggtgtcgcttttcaaacatccaaaataaccacggctcatgtgttcaacatgtgtcgatgtccagcgcttgctcagcattcagcctcaaactcgctatgtagatcgaattttctcgtatctcagca
>Skav234506
CCATAGCCACTTTcatccatcatcccagccatcaagggaccaccgtgtcgacgtgccaggtcgattccaaccgccaagagaccgtcccttggaacagcgcagcggaaggacgatccgcaagtggtgaaggggaccaagccatgcgtagcttgggcttagctcagccaccgcaagtggcggttacccaccaccaacattgatagtggttgataataggggagagtaaccaacaataatggttgaaAGGCATTGTGGATCAAGcgttcagcatttgccccgcatgtctgtgtaagtcccggggcgggccgacgaattggtcc
>Skav236702
CGTGAGCCAACTTGGCTCAtgaacagattatcttgtaaatgtacacggagggtacagcattgtggggcactgcagtgaagcactatcaattgcttgtctagcacacttgaaagccactctaacgatgtctttcagttgtgtggcacttctttttcatcgtttgcgcaattgaagatcattaaaaaaagtctgcatgagatggcccagcatgacacatggcagggatgcaaataaggcatccggcgacttgagCATTTCGGGTCAAtgccagtgttgaatgtggattagctgtgctgggctgcc
>Skav203884
CCATTTTTGATCAggcgtgggcagtgctggcagcagtgcacgcagcagagcacttgctgacaaggggtgatttgtgtattgaggcaatgtcctgttttggcatgtagatttgcagagctgtcatcctttgacgggtgcatgttgcttctgatagatttaatccaatggtatggtgctcatggtgcatgtggtgtttctgcTTTGGCTCAAagtgggatgaagtgacgccaatcctttggtgacacaaagctcagcgtgggagc
>Skav219984
CCATTTTGCCTggtacaaagaagatggccaggttggagagagagcatttgatttcatatccagtgctggttaaattggttaaatttcatgcaacttgtcatcacattagccaggtggacgtgcagagtgtttgggaggcggctgAGCTTTTATGGCTCAgtatccagcagctcagactgaatcagcatctcctaagcttcatggatacgccactagcggaagcagctgaaagcttcatgtgttttggatgtctcatgatgtatcaccagtagccgtagcagaaaggcatggaaaggcccagtgggagttggtatgagtcggttgtagcttcaggtttagccaatgcgatcgctcggagttgccc
>Skav225088
TACCCATTTTCGCcataaacatgtctgtagccacaaacaacatgggccaaccgttatcgagagtaacgatcatgtgtcgtatgtccgttcactctgcacacaaacatgacccaatttgacagatcaaaatattatcaatcgtaCATTTTGTTTCAAtttgaaaccatgttttttactctggttggagtttggactgtggattgccagtcatgcccttcattccttaatggttcgtggttgttacgacaaatgatccagcaaaacaaccggaataacgacggccgtttcgaacagcaa
>Skav213920
ccgtagccattTTGGCTCAAGgtcttggctcaagtggccgcttggtccaacggtgtccagttgtatctttcgtggtcctgggaacgttggtgtgtggCCGTAGCCATTTTGGCTCAAG
>Skav210914
CCATTCTTGGATCAttgttgaccccagatgtttcctcacattccttccttcaatccgtttctctgacaaaaggtggcctttctggaggctggagggatggtgagggctggagagtaggtcctgtttagacagttcccatctcaaattatgcgcaatgaaagaatccacaaaggtttatgacgacctgaaccaaaagaggatggcaattgtcagagcacagctgccgaccctgagaTTTGGCTCAAagattcagctgcttgcctagtttaattgctgcagctcaatggcagatctcgctgtaggatatgtttgctgcttagttgctggcttgggttttgccgtgaactacttacctgtgaagagcttcgacgttggagatggcatcttcttctctgccgca
>Skav232914
TTTGGCTCGAGTTTGGCTCGAGattttcacggccggaagtcagcaaggagacatggctgacgtgctgtccacgtgcctgtcagtaccaccaggtggacagactttcattttg
>Skav212279
CCATTTTTGTGCCCAAGggtcgcagcttcaagatgggcagatcggtatgtcCCAGCTTGGCTCAgattgctagggtgctgacctggagccacggagtccataagtttgccaggtggtggtttttattggtctcttaaaatgggggtgccaaccaaaaaaggctggtgcatcatggtgcatcaatacacacaaagaatccatcttggatgatttggggggttccctattttgagaacctcccatgttatgccacagtattcaaatctgtttgtatatatatactgatacgaagtagtcgctccgactggttgggagaactgtgggtagagcatgtttttcctttgtgaTAGCATTTGGCTTAAGggggttgg
>Skav210067
CATTTTGACCCAAatcaaccacgaacatccataaaccatggccttccgcgatttcatcatcatctcatGCCATTTTTGGCcattgaaatcttatgacttccaaggcttccccagcatttcttgtgccc
>Skav227972
CCATTTTGGgaccaatttttccttgattattgaaagcatCCATTTTGGgaccaatttttccttgattattgaaagcatCCATTTTGGgaccaatttttccttgattattgaaagcatCCATTTTGGGATCAAtttttccttgattttttagggcatCCATTTTGGgaccaatttttcgttgattattgaaagcatCCATTTTGGaagatatcataaacatatttcttctatttgaacaggaatggaatcaatggtaaccaaatgcaggctggtaaaagcaaatcttcagatcctgtgaagatccacattggcaaggcggggggggggattgcacgaataacgaattcaaatctttaaacttttatctcctgggaacctggaggacctcaatcgtttgctgctgtcgtgcaccgtccctggtgcaggaacacaaagaagtcaggttcactttgtcctacgactggtttgatctcatcaaatcggggaaaaaggcttgcgag
>Skav200751
AGCCATTTGTAGCTtgaagtttagtttattttcttccCCATTCTGGCCTCAcagg
>Skav228467
CCGTACCATTTTcaagttcatgaattaaccattctattttatacttattttgccaagaatttcaatacccatatcataactcaaaaccgtgttcgaagatattctaccaaccttctcaacattacaggaatatggttgacccctgatagctgggggctcatgaatgtttaatatcaaaaccatagcttcaccatcgatcaaccatcgattcatcatcaaatacccctaaattcatcatcattTAGCCATCATTTGGCTatggcttgaccacc
>Skav228492
CATCTTTAGCTCAAGttcacttagggctttgagtgcgcccgaaccgtttgatacttgtacattccatttgctgcctgctgttgggcagagatggctCCACTTTGGCTgccgatgtggtgctcctgcctggttctcctggttggagtcagcgctgatcgacctgaagggaaggatgtcacagaagaggtggacagtgctgggttcatccaacttgctcccgcagatgatgagatcgccaaacgaaacgaggccttcgacacattgtggaagaaatacttttcccactaccgtgaactgaagggaaccaaactgtcg
>Skav213651
TGGCTCAAGcggtgtcaagagtgaaatgcgagttccaaatcttgggctcagcaaaccggagaaccgccttgtcagggtagaaaaacaaaacttagaagaaatgatccaatgatagaatgcagagcgaacaaaacgagaaatcttaggaatctcccacatgtatagacaccgagaaggaacgcaggttcccaaagaggcgcctggcgttgcactcgatgcatacggagacctggtgcgacacgtggtgacacgttgatagggtgaccgcaagaaagccatgcagggagatccagccgtcaaagtCCATGTTGGAACAAGatttcatgtggatttcttgaggatttcatatggtttcatgaatgtttgaattctttttgaagtgTTGGGCTCAAGagtttggcgctacagagcgtggaaaccgctgtcca
>Skav220150
TTTTGGTTCAAGcagggggggcagGCCCTTTGGGCTCccccctcttgagccaac
>Skav227672
CCATTTTAGCTgatttgagtgttaggttttgttgcaaaatgatcatggcaaggcttcttcatgcacagtacagtcagcatgtagatccttgaatttataaaagaattgcaacaattgcggagtgggaggcatcagatctgaggacagcccatgagttactgagtcgcttttcatttcttttgtatctgccaaccttggataacTTTGGCTCAttcttctcaacgactcagtagcacttggcattggagagatcgtttttagcagcgtctcatcttgacc
>Skav214318
GTATGCCATTTTGCCGCGAAGgcttgggagacaatcaagaattcctgaaaatatttggaaacttgccactactcctagtagatcctagtagcaattaatagctgtgttgatagcatgcttcaatggtcagaattgggcagcaccgctttcactgtatctcttccgaacaccgcactgtgcggcagcgTTTGGCCCAAGagtgtgctgcccattgctgtgttgtgatttgtg
>Skav207627
TTTGGGTCAAGatttcggaagaagtttgatgagacggtgattcacaggcaaggcatgaacgcaaatccttggtcgaaagactttcattgtaggactgtaaatgcttccagtgaagatatcaagtgaacctctcattcagtctctcaaactgcagactttttgatcaaggcaagacacttcagttgcttgccatcagcccaaaatcgcaatggcgcgcatgttgcttgCCGCTGCCCTTTTGGCcatcccggcctcggcctatgtggctcccagagcaggtgccacccctccacagagtgcacagctccctgcatctcaagtgcagcttgagccactggacttggaggagcccagccagtctcagagcgtcttcggcatcttgagtgctggctttggtgttggtgctatgttgggatggctgaactcccgcaagcagcagattgcctccgtggctgctgcatctgcggttgcc
>Skav227159
CCTTAGCCAATCTTGGCcatcattagtcgcagtcgagccttgaatctaacatcgtattgctactcattgtttctcaaccactaccgtattccgctgTTTGGCTCAAGtgcgccacggctgtggctggcgctggttcccgctatgcatgcggcgggcacggtttggcacatcacagtggggctgggtggcgttgggattttgctacttttcggcgcagatgtcgagtgtgacgctgaaagcaagtctgattgattctgaaaagcgtgcgacggaagagattctgagaaaaatgcccgcgaaaaagcagattggaccttcctgcggatccacctgtttgtccatgtgcttggaatttcatgatgttcca
>Skav222605
AGCCATTTTcggggtactggtacccatatggcttgagaaaccaccatctccttcggtgtctgaaagcagtggttgagtttgtgggcaaaatccgtgcgacgggactttgCCGTTAGCCACTCTTGGtgtagcttttgccatcgccagtcatcattaacattgatgaacagcaatatcaattttgcacttaaccgtcatttagccatcgcttagccattatttgattgctgaattagccattcaagtaagcaagtcccatggaattcaccagaactaaaagcatgaatttcatcaatcagctccatcaacccattacttaaccatcatgaaccattgaattcgccggacacacttcattttgcactgcttgtcttgttcaatagggaagtgatagcatccaaggggcccgagaattcattaccgcagaattttagatcgaccgactggtgtgttggaatctccgagtttggatcgcttctgggcc
>Skav233386
GCCATTTGGCTCGAGacttccaAGCCATTCTGGCctgagac
>Skav200264
CGTAGGGATCCTTGGCTCAtggccaacaacatgggtgattgtagctttgtaacggttgataatgatagatcatggttggtattggttggtgttggcctgtacagccagtaataaccaacaccaacgacaagaatccatgacttacagtgcaatggtcatgggggacagtggttgatggtggctattagttgttgattctggctcttcatgcttgaacaagtttgcttgacagccttaatcattgacaagaaagaccaacaaaaacaccaaccacagcatatctttgtccggaaaagtcatggtaccctgcatcattggtgaaatccctcctaaaatgatcctgatactttgaagttcttttttttgggggaggcattactttgtgaaagaatcgcccctgaaagtgccatgagctgattccgtgggcccTGGCTCAAGgtccccgcacctgatagtcgtgttcatagtttacgagcacgacc
>Skav230234
ATTTTGTCTCAttcgtaccggtgaacaaagggcataagaaccaacaagaccaaataggaatgttggtgggactgctgatggaatcaactggcaactacggattggtttggtgacctaccagaggtgttgtcatctccttgtctttgagcgaggaaagcatcaattcttgcaggttaagtcaatcacaaaccactaccaccagcaccagttggtaaaaagCCCTTGCCACTTTTGGCCAAGaccatcaccaaaggacggattggtacagcg
>Skav218102
TTTTGGTCAAGgtagtgctggttcatgttgacccttcatacgttgatgctacctttcttggtgatcgctgcgccgtcggtggtgcagctgctgcttcccagcgaccagggacgtttggcggaactctctgcggtgtccgacgatgcgttgggacaggccgatgaggccaaacagcaggcgaggggccaggtggtggtgagcttcatccatcttcacctctttggtctgactatgtcttaatcatctcaatgggtagcacttagcacctgattacaccaaccttcagtcaaccacttgcaatcctatgcagcatatggcatcagatggcgatagagagagagatatggcatcagaatggcatcagatgttatcagcttccgatcactggcagtgatagctttgccagaggtatgcgcccagAGCCTCTTTGGTTCAAGacttggggcgtggcccgcagtggcgtcgtc
>Skav233102
TACCCATTTTGtgttttcaaggagcaagcaatcgtgaaaatactcttggctgcacaGTAGCCAAATTGCCCCAtagattgagactccacaaaaagtggcacagcaaaaaccccAGCCACTTTGGCccttgcggacgtttcatttgttcttcgagtctgttgagctcgccgttctgacgcg
>Skav226829
CCATATTGGCTtgggcgatccagaactctaagaggtgttagtatgagggcagttcaagctcattctccctttgcgggatcattttgagccttcaaacgaataacgctttgagtcataccacgacattttgatacattttgagtgctcgactttcagcagtccaagttccagctacctccaatggtttgcgttgcgagttgactgtagaccagatgagaccgctcctgtgcctcaggagctgaatgcctatctgaaggctttgaagccctactactactttgttgagttactcgatctgcagctgacCCATGTTGGTTCAAtggagcttcccaaccacaaattattaaaacagaaacacagtataggggttgtggttaatgaatccctgtttttcctgcggac
>Skav208652
GTAGCCATTTGGCagctggggcagtcgggttgctggccactaacccgtctacatcattggcaactcattgggttttgtccgtaaatgatggatacccactcaccatcctggaatagtttgtatcaaaactgaaaaacaccagttttttgggGTAGCCCATTTTGcacgatcccataaatcattgacgttaagcatcatgtacacatgttggcgtgctggcgctgttacttgcacacccacatcattctgtgtagacactggaaacacattgacatgtgac
>Skav233911
CCGTAGCCATTTTGttttgactcaagcTTCGGCTCAAGgcctcgcttagctccttgcgaaatccgttttttttcagctctttttgagtctcgaagtcgtggctgagcacgtgctg
>Skav225004
ATTTTGGCTgcgcctaaatcAGCCGTTTTGGATCAAagtgccttttgttttgagaacttgcaggcagccattagggcctaccattaggctttttgagaactttgttttgcctccaaagtgcctttgtgtctttgcagcgctttcctttgtatcactttgcgaacccgtgccttgcagtgccctttgtacatcttcaatcctctgagtctgcggtccaagt
>Skav218276
TGGCTCAAGattgcttagcttgcagcgaccaacgagacaacggtactcacgcgttgaGTTGCCCTTTGGCTGAAaaatcctgggagagcattctctatagaaacaatcttcagttggtggacactgaggtgattccaaatcgatggaagtctcagcatctccgatcatccaaggaattaaaaactagagaggatgttccaccaggtttttctagtctcagttgccagcaacaccagctgagaacgctgtcgttcaacaatcgattggatgaagcaactggaaaccgaccaaacatcagctcatatcagctctattcagcaacaagttccacaaccttccaggaacttgataggtcttctgacgttgagtcccgttggggcagaggctgttggggctgacatgtcaccgtccactgagatcctgg
>Skav220786
GCCAATTTTTGCACAAcgcttttggcagacatccaaattgggttggtgggagaacatgatgatctaccgcaacgtgtacgtgaactccaccatgcgctttgtTAGCCAATTTGGgcagatcggcatcccccaagtggatgctgcttggaacaagtggaagagcagcaacgtgactgcaccagctttgaaatccaatttgcggggcaggttgagtttctccatgggcgcagtg
>Skav208158
gttgccttttTGGCTCAAGtggcgtggctcaagtcctgtggaacttcattcagtacagtagctgtacctcttcccctgacgtcacGTTGCCTTTTTGGCTCAAG
>Skav221078
TAGCCATTTgctggatttattgactggcccgtgTTTGGATCAAGgctgcgttcagacagctcttcgaagtgtttaccgtcgaggagaacggacggaggccccagccatgaaggatccgtgtgagaagtttcgtccgtgatgttgatgttggccatctcagttgccagacacaatgccttgacaagtacatacaagtactacaagaagtgaaacttggcaacaacaaatcaccaccagacaggtgaaaacag
>Skav216358
TAGCCATTTTGGtttccccaccaatcatcctttattagccagttatagtcataacctgaccgtttTAACCATTTTGGGTCccctattttgagaaacccccaaatcagctgattttatatagccgtgttcttttttggtggctcaaaccactttcgagcttacattgccattgaaaccgtccattacgccagtcgcagtttatccgtcatgagctgcctcaaagtggtgttttttaccttagctgctgtcgctgctgcgcaggagtgtcagaattgtgaggcggatgaactgtagcttcttcaaacaaaggctggggagaatcagaccaagactgtggagaattttgccgacagcaacaacaacagcttggagactgacgggaagtttactgactatgatgtggagaagttccccgacttgtccaagattttgggtgacggaggagccatcgcatcaggcattggacaggtgacctccagg
>Skav233556
AGCTCATTTTGGtgtttggacggtaccaccaatgattctgaagcatttcattattggaagcaaacaagagtcatttagaatccagagttcaaaGTAGCCATTgttccccactactcaattatcaaccactactgtgagtggcacaagttgagcc
>Skav210032
GCCATTTTGGCTCAAGgttgtttcctcatgatctcactctttggtttctgccttgttgttttcgtgattggctgcgccattggggccttgtgcacctgctgggtggtcgctctttgggggtccccccgaaggggtggatgccagcagcgccctgctgtgttgggtgcctcttcgtttgctgcattggctggctaggcagtctctgtgatggccggctatgggcatcctaccccgactcagctggcgactctggataccttggagcggattcgaacttggtgcaggtgcgagcttccagtgtggcaggctgtggacgctgctctgggtggggttgcagatgctactctgtttgcactgttgccgatgtCCATTTTGCGCTCgacattgcgcacggtgcgattgggtaccccacctcgagagttgcatgcgatggagaccattcacatcgcttac
>Skav220760
AGCCATTGTGACGTAAGtgcagagggcaagtgtttcccaagccaaggatcacaggcgccacgccacttgaaagcagactgtcaaattttggactttgggatgtcctgctcctgcaaggggtagcaactggcctgcggttgtgacacggcccctttgaaggcatggtTTTTGGCTCAggcccaacggttcagcggtgatagatagcacacaaattttcgcatcatggcaacttccttccgatggcccttcagc
>Skav208491
TTTCGGCTCAAGcgagtttccagatagaggaacTAGCCTTTTTGttgacgcttttcaagcgcgccgagaaaggagagaaatgaccatgacagagtgcccgaacacagaaatgcagtcattcccgcagcaggtgatcgtcggcatcttggtgccagcaggccaaatgggccaagtcggccaactgggtcagtgtgtagcaccccaagtccaagtgggccaggtgggccag
>Skav210643
TACCGATTGTTGGCTCAggaaaagaggacatgatagaggagaaattgcagcgctgccgccgatctatggctgatgtgcttgaattggaggagattccagagatagaggagaacaccgaaacgctgaagcacatgagaatccacaaattggtggctctaccagtttgcaacattttgattttataatttctaagttttgctcactcaagactgcctggtagcatgctgggtttgccatttgatttcctgactttttttgcccagcgtgaatgccatgattggttttttgtttgtgtgtatatatactGCCATTTTGaggctggagagaaaacctttagctgggcacttcagcttcctgacgaacccaagagaatcatgattccaaagtggatgagcaaaatc
>Skav225724
GTAGACATGTTATGGCTgggcgcagctgctgttgccagataggtttcaacatgtttcgggtgggtgCCGTTGCTGTTTTGGGTAAAatgctgttgcgggatgggtgccaacatttttcaggtgggtgcccctgctgtttcgggcgccgctgctgttgccggacgggtgtcagc
>Skav227208
ATTCTGGCTCGAAGctggggaagctaagttacaagctgagcaccacacggatattgcaaagcatggattttcaacattggaacatcggtgaagttgtcagcattcagtagtatcaGTAGTCATCTTGTCTttgtgaagcatcgttgatgtcccaatggctccacgcatcagccagcatcgaaggcttgcttgcccttggtgatggcttcgagctacccagccacttggagcagggaaacgacagggcttgaggtgactttgaccctgaaccaactgatccccaagagtgagatcaggatatgacgatggtgaatgatggtgagtgatggtcaatgatggtgggtgagtgattgaaggatgggtgtctccagggatcggatcagtcatatcatcaagttgtcgaagtcaggtgctacgatggaatttggcgattgccactgctgcccgggtggccaaatggaagagggcc
>Skav214458
CCGTTGCTATTTTtccaggctctttgcgggaatccggtcgaacctgtctgaaggctgggccgcagtacaaaatgggtgctcctgaaattgctgaagatgatcactatttttgtcgtcggaaggtacacgtggccaatttttatgcttgcagtcaATTTTGGCTCAAGaattgttgcttgacggcctagtcttgcatagtttgacaccatatctagtgcaggcaaag
>Skav205901
ATTTTGGCTCAAGtctgttgttttttttcctcaccgcgaaagtgcttagtacttggagtgAGCGATTTTGGataactaatccgaggtcagtcgttcagatgagcgaacttgaccttgatctcttctggttgttgatagagacagggaatctcgaagagttgagaaagattgtcccaccgggttttgactggagtgtgctccatcccattaaaaaaacaaccgttctcgtctcactgctggcagcttgcggagagtctgtagtcattgaaaatattgagtgg
>Skav226106
CATTTTGGTTCgcaagacaattgccggagaaactgcttttcactgctgatccgatgaagtgaggctgcagtgttggCGTTGCCATATTTGGtcttgacggcggttttcctgccgagacttcagcaggaaaaggcctcggcctacacaggtgctttacgttcctcagcaaggaatgcagcaaatcaattttgatcattcgttagtttttaaattctaattttaaccttagatttcatcattttgttggcgcccaacggagtgtgagtctcgag
>Skav227183
GTTGCAATTTTGCCTCggactgctttcctttgccgcacaatgatatgttaacccaattcagatcgacatagcaacgatgctgcacaaatcacttgactcatagaacaattgtttgctggaccagcgcaAGCCTTTTGTGCTCAActttcctctgcgaacagcgcaactcatttgtcagtcacg
>Skav236081
TAGCCATTCTGaacaccaataccactatcatgagcttcagccatcaatgacactcTTGGCTCAAGctgtggttctggagaccctgccacgacccaaagaacgctagcgctagcactgagaggccttcaaacacctctccaatggtgtctgggggaaactatcacaccgtgcttctccgaagtgatggctctgctgttgcgtgcggaaagaacaggagtggtcaatgtgccattccacctttagatgacggtgcaacatacacccaggtttctgcaggtggctttcacacc
>Skav212016
TTTTGGCTCcggttggcatcaacagttgcccctgttggtgccggctagctacagccctagggggaccggtgcgtttcatgtgcattcgctccctcgtgcggtctcgctggctccatttggtgatctggttgagtgccttggcccaccacggaacagaggtggcaccggtctgcgcgccagcggcgggctcgagatcggctccatctcaagcggttagctgggggtcgtatcgggaaaagggttcggaggcggatctggATTCTGGCTTCAAGgctggga
>Skav206302
TAGCCATTTTcaacgatctacaagttaaccatcatcaaccatcatcaaaaccatgagtatataaacatgacaagcgggcagttaatcaggaatcactacatgggatccagtgggtacacctggcatcgCGCAGCCATTTgaagcgacgcagcgagcgattgaccttagcgccagcactcc
>Skav217230
CCCTTTTGGATCAAGggattgacacctgaccagcaaccaggattgtacacttccatcaaccagaagaagggaccatgagccatgatagcaattaaattgtaaaatgctgaatgatacgcatgagtccatgagtatccatgaacaaaagatcgccaaccatcatcaattaagcatcattcgaagccgctgagtttggcttgccgtctgtcaatattgggggtttcttcaaatgggggtacccccaaatgatactttatgttcattttgttcagtaacaaactctatCCATTTTGGggcttcccaagccatgaaaaagccaccattttggagaaccagatgtcaataaaccgtcagtttaagccagaatagctggtgaatgctggttattgaaccactgctcagccatgaaaaaaagccactggtcagccatcactgcttggaggggcacctgtgaacccaccaagTATCCATTTTGG
>Skav231158
ATTTTTTCTCAAGatcatggtggtcgcatggcattgcagcaTTTGGATCAAGagtctcggcccagggccgagtattctccgggtgaaccgtgccgagaagcgtctttgggctggagacgctttcgccgatcccagcgggtcccagccctgtgtccccgatggtccgaaggcattgggcgttgccggcgttgctggtactgatcgtagtcgttttctgcgcacgatgggccttcgttcctgaggcgccgcggcgagcattgccagcattacttctggtggccagtgcaccggcacacgcgatcaagggaaaggaggatgatgag
>Skav217244
AGCCATTTTtttggcgcattgtgccatttctttcacgctggaaagtcgtcgttCCATTTTGGCTCAggagtagtgcccgaagctgccacatcacacggtgtgcttttgacactttccgttcgctgcgcgcttttctttcgccttttctttcgaaact
>Skav202525
GCCAGTTGGCCCAAGtctcagtgaagtgcctttctgcaacgtgacagtcatggcgcttgtacgtcgaaccttgtcttgccggcgcaagtcatggtcgacgtgtgtcttgcttctggtggctgcagcatCATTTTGGAGCAAcattagcaaccactgcttcgcccaactttgcacacagaccaaaaagtccaacaaggaggacttgtggcaagaagtg
>Skav224183
CGCAGCAACTTTGCTGCTCAAGagcagctgtggggatgcCCGTAGCCAcgtaagacacttgatttttggatgacaccagtatgattatcgattttgttacgggatgatatcatcaagatcaagaggctatgcaatgaaaggcacgatttttcggatggttttgactggatccgattcacccatggcgccgtcggagccacttaaacaaagcaacatgtgatgtttgcgctctatgttatgctacatgtaaagaaaattgtagacacatggaggtgtaaagacatcaatgtgagacaagatgtagataaaaaatgagtctttagatgtttcaatcaaaaaatcaaaaagaacaaaacaatccgttcaggtctataccacagtgcgtttgtgttgcctccaaaaaaccacttaatgaccgcaaaaggatgagctgcg
>Skav219698
AGCCATTCTGACTgcagagcagcacgatgtactcttcccacgaggacaaaggaaggcaccgagggtcaggctgaagcccaggaaactatcggggttctcaggaaagactgaaggaaactgtcgattctcatgggttctctttactctgacggctccactttttgtagaaagaaacgaagtccgcctgctgagcatcttgactaacgaaaccgctattcgtgttgccagacttcaaaacccaacattagacagatctttgcaaagctgtgctgcgatacttgcaaggctttggcTTTGGCTCAtttctcgagggcgtgcttgagtaccacactccaagtgtgtattgtgggaggttgcaatcttgaaataacattgaacagcatgtcctccgtttgctgcagccttggcttatgagttcatctctccagc
>Skav205676
CCATAGCCATATATAGCTggtatatcccctaggattgttgcttattatccccgattattaaccatgaaccattgacattacccatcattcaccaagaatcataaggaaggccacatgcCCGGAGCCAATGTTGCTCAgcgctgtgccaccttctgcgacgacttgtgcagccagtccgagcgagaaatgcgagctgcgaatggtcacagcagggcttggcaaatcaaatggtgtaagaaagggatcctcaacaaatagcaacaaggccagactttcaaagtaaatgtgcctttactagtcaggcaacatcaagatatagcagcacatcagcatcgcggcaccgttgttgtcggtcggccggcgtgccacgttggtcacgtttcgttgccaggtgggccaggccttgtgcaag
>Skav236080
AGCGATTCTGGTCAAtgtgatattccccctttggatgacggtgttacatacacccaggtttctgcaggtgccgttcataccgtgcttctccgaagtgatggctttgctgttgcttgcggagacaaCCCTTTTGGCCAAcgtgacattcctcctttagatgacggtgtgacctacacccaggtttctgcttgcggagggaacagtcatggacaacgtgacattccaagtttagatcacggtgtgacatacacccaggtttctgcaggtgccgttcacaccgtgcttctccgaagtgatggctctgttgttgcttgcgggaacaatgaatttggacattgcaaaattCCATTTTTGCTttcctgg
>Skav208654
GTAGCCATTatcgttattcggcatgaatcattgtgcatggatttgaaggctgattaaaccaaccaccattcacaaccagaacagccacgataaaaatgcatgattttcacggttgcaaatacggttggaactatagtaataactatcatcaatcataactgcttggtggtttcaaacattcttagtatttgggatgatcgattcgaagATTTGGGCTCAggcgtcccgggccaatcttgttgggccgttgaggaccacgaaaggagcc
>Skav211202
GTAGCCATTTTatggctagctagaatacaggatgGCCATTTTGcccttataaatatagtccaactatcattcaactgtcaccaacggccagtgttcagcctttctttccatgcctgatttttaagtaccaacctgaccactgaccatggagcctggcttcgcaggaaggctggggcttcaacgttatgatccaacaggccacctttcacaac
>Skav201574
GTAACAATTTTGGggtggttgctgccagacgagtgcttaccatacttttttgccgagccgcccaaacgtggatcatcaacccccctgtgatcagccgtgtttcgaccaggagcgcgctgctggtactaggccatggcctgaccatgccatgcagtgggggacccaggattatgccaggatgtgcttggatgtggatacagtttctgtggcatcatctcatcatggttcactcaggagccgttcgcccaaagctttgtgtggctcacagctgtaccatcactgccagctgctttgttgggactatgctgcctgtttgggccatcatgctggtgatgcctgcctactcccagacttggcaaaaagtgaggaccacaacgctggggatgcgggcacaCCATAGCGCAGTTTGGgttgacagtctcaaaggg
>Skav235948
TAGCCATAGTGGCaccgcgcattcgtggtcagcctcatattgacccaactgccatgtaagttgacacagtctgagtttgagccattcatttcatcagatcctgttggttggtcttcaggccagtcaccaaagtggtcaacctgttagaggcacggtgggggtggatgcaacctgtcatgactatgatgaggtgttccattttcagaggcgcaaccaggtcaagacatatcccagaacttgcttctttattgctgaacttggacgatgtttggattgttgacccatgaggatctgcattggTTTGGCTCAtgaattcaccctgcagtagttaaatcatggcgggggaggctgtttagagtcacccttgccatGCCATTTGTGGCTgtgacatcagcgcagggt
>Skav225741
GTAGCATTTTGGATCctgcaaagttgggccgcacggtgttgcgattggatttgCGTGGCCATGGTCGCTCGAAGtctgctcatgagccctgcgacggcgatcacagtcagtacttgtggtcggagctagcgaaagatttacgacgggctgccgctgactccgtttcgcgatcgttttttggtggagaaggacttggcgcggcagtggctttggaggcagcaatcgctgcgcaagcaagcggttcaatcgacgctcctccaggtttggtactt
>Skav207779
TAGACATATTTGGCTgctgtgcatgtccccattgtcaaagctagtcgatcatagcttcagaatagaaaagccaatcatgattctccctttcatggatgagtcgtgtgaaattgcttgggcctcagagtattactctgcatgaaccaaaagaagcaagagtgcgccctagttcgtcaacatgtgaactttctcaagaaccatgcgtgaatgaacatggtcgaaacgcctgttgcctttcgtggtatcttatttgatgtactgtcctgttccgacctccatctgaacacattgaaatagaaaccaacggacaaatgggtgaagcgaagctcattgaAGGCATTTTGGatgccaaagagtctgatccctgCCGAAGCCTTTTGGaaagaacacaactcactcgtagacctggacccagtcctttcccgagcttcgttcattggacacattgcgcgaaacg
>Skav218798
GCCACTTTGAGTCAAGtagatgcggcagctaaggcgtagggtgttcataagatgttcacaggatgttcatacgtgagtctcttggatttcatggcaccttgaataggctgcagaagtggttgctgagtagcctttgagatcattcgaacagcgaatgtctctcgtagattcgattggtccgcaagaacaatggaactcttttgaacttggtctcaatgaaggaatctcatgctaatgattcgtgactggcattgccaagcccgcgttggcccaatacgggcTAGCCATTTGGGtgcacacttttttgtcagctgtcctcctttgtcctgttaactcaactttgctttttgtttttcatgtcctttttgtcactgactactgcaatgctggatgtgcgaatcccttggcaatcgctgtgaaaaatggagctgcagactcgaccctggaaattcactgcatcgttgttgtgaaagc
>Skav223722
GTGGCACATTTTGGagccgctgcatcCCATTTTGGgccatggacgtgagcgagcacgtcagtcgtctgctatgctgcgtggcagataggccggacctcggtaccaatgaaggcttcgcaggtgcatggaagcagttgcaggtggaagtggccagggagccgattttctccaaagatctgttggaaacgctggaactcgaaggtgctttgaagttgggcttcggacctggagcagtttcgctggaaagcgcttggccaactcccacccaacgacgcgtgggactgaaggaactcacaagcaactctgactacctgtcc
>Skav213752
GTAGTCATTTTccaatggtcaatcaatagttccatggttcattgactggcggctaatcaaccaaacgaatggttagcatgagccaaacgttagttggtcattatccaccatgtttaaccaccgataccatcatgttttgacgggtcagttcgggcccctgtacgttcgactgttgaccctgcgctacagtcttgcgctgttgggatgtgacgttcatccatCCATGTTTGGGTCAtgacccatccttacgtgcctgtgggtcataccgctgtacccggactggtgtaccatcatttgccattgcatttgccgcatgccatgcattcttcgcaacactccggaggatttctgtaCATTTTGTCTCAcatcAGCCGATTTGGCTCgggggatcccccgtcgtggcttggaaattccttcacatatctagagtagagactttcgaggaagtcacccattcggtcgccgagaacgcgcc
>Skav215313
GTAACCATTTGGCagtgggtcaaaaccctgtaccatggttcccctatcattaaccattgttttcccctatcattaaccattattggttggttaatattgacCCATAGCCATTTaagatcgtttaggattttttaagatcatttaagcagctcgcgctcagcggctcccaggt
>Skav223130
CATTTTGGCCTCActgtgcaCATTTTGGATCgtgtgctCGTTGCCATCTTGTATCAAacaagaagctgcgtatcattatcaggcgatttgtttgaacgaaattacggatgaagtacagtacacccatgcaagcttctttaattgtacattcctaagatgtaggacatcacatacacgaaatatcgctgcaacaaaccattagcaaacatcaaggacacagagtagcctttgacaattgcatgattatcacgcggcaaaggcacttagatacctgggttgctccgattgcctggggcc
>Skav224987
TAGCCAGTTTGagtgccagcaaacttgtccagctgttggatgcgcccagaatagcagtatctttgacgaagactccatgccgccaagtcctgtccacctggcttgttgcccattccattgctgtgaagctgaactcgtacagcacttccggaaaggttttcattgcaacaaaggaaatcggactgtcgcatgttctgttgtattctgttggggcacatgattTTGTGGCTCAAGatctgcgcaagataagcgcggagattaaccatagatagctgaaccatcggttcgctagaccgctaca
>Skav220661
CCGCAGCCATCTTtcaacaattcaattacgccggcaaccgtgcacccaatctttcggccccctgcggccatggcatctccgggaagcggcaagacaattcaggcggggtcaaaagcacacgttgtgaggacatgtaaccattgtttagctgcgtttggcattgcgtctgctgcatgcaggcagatcctctcgcggcacttgtacgggctgagcaagcggcgttccgcagcttcgttctgtcccacccgtgcccttcggaagaAGCCATTTTGcaatgg
>Skav223192
TAGCCACTCTGGCTggcaaccccatcatcatattcttggaacatttgccaaacttgaatgaggccctcaaaaggcttacttctcatcatgctaccccaatggctgtgggagagcggTTGGCTCAAGgtaactacagattttttcacagtggccattcgctgggtggtcccagggtgccatggctcacgaagagctagaggaaggaagtgagttcattcttgactggcacaagctgaagaaagtcgctgcgtgcgaatcaccagtggtgccggttgtggtccaacatgcggacact
>Skav223335
AGCCTTTTTGGgcttgcaagtgtgaatgcggacccacacatgagcatagatgtgaggttccccagcgaatggtggaacctgttctcgcgggtttgagggttgtggtcattgtatttgttgtaatgccgggtccatttgttcataaaccaacatagtaacatatttgggatagatcaccggctgtttaagctgaacaggggatggtttattcatgtgaatctcctcatttgccttgttttggtcatttaggttggtgccttagatgtgtttcgctgagtttatggcagcatattctgcatcccggatgccaagcgctgaaaaatgtttgtcttattatcAGCCACTGTTGGCTaccaccagccacgagccataaggaaccaccctacccatcccgccagatggtcac
>Skav206534
AGCAACTTTGGCTggggggagtcgcactgggacaagctcaactgcttagggttgcgtggtcattgcattttcgtggagttgttgttggaatctactaatccaagggtggactattggactttcttggtacttcttggctttttatctgggaatctacgaattttgggagttattgttggttgttcatatgttttgtttcaagcatttcaccccaggacagtgcacatagaacttgtttagtccatccctctgcgcgggccatatctgccttgcagtttcaatCACTTTGGCTCAAGctctcctcacagtgaaggtgcgtccgcagccttgcctca
>Skav227045
agtcatTTTGGCTCAagatcggacacgagctttgtctgactgggtgataaatcgccaagttctcaagccgaggttgttagtaactctggtgtagcgacagctggcttcccttcgtcactgaggttgtacctttgggagcgggagatccggttgttggagagcagagagccccagccaagccgcgagcttttccttcatcactgagggaagctgcagcgagagaaagaaaggctgggagaagaaatggctgcactggaagagaaggcgccgaagggcgcgctcagtttgtccagatgatatgtatccccgagattttgccgcttatagcccgaaataagccaaagcagtgactttgaacgcagcgacgcaatggctcgtgtttggctcacccaggaaggcacaagagatccagcgaagagaagagaattgttcttccaagcggagttgctgAGTCATTTTGGCTCAAG
>Skav218832
AGTCAGTTTTGGTTCActtccagcacaatctcccagaaatgtttgagcaagttttgggcaagctgggaaatgtctgtcatggatggtaagactaaaatcgatggctttcaatttcagacctggagtttccaaccaagccagcgggtggttggcttccagcgggttggaagtaagttggcctacaaccacaagagaactaccatcgttacatCCATTCTGGCACAcgcaaaccagttgctttccttgcttccagccaaaagaaatcgaaaaacacagccgtggagcagatgatc
>Skav203979
GTATCCTTTTTGGgaaggcaaacagctatagtgaactcgctggtggcttttggatctgccatgtgaactcggttcccagcaaaaaagggcgccgcagtaattgccaagaatggtaggaggtccatacatggtggtacctattaaccgtccaatatagccagtactaatggggaaaccaacacttatcgcggtagatcatttatggacacccccttgtgtgaacaatacactacacctcccctgcctagtatgtgccaaacagtagtagggaaccaacaacgatacttggatctgactctggtttggttgtcagcccggtgcaaaccggtaatctgTGGCTCAAGcggggcacttttgatggcccccgcgggcc
>Skav200469
CATTTTGGCatgcattttcgaATTTTGGCTggctgggtcggaactgatgattttggagcatatgtatagactaagtcccagtttgttctttacgaggagctgtaagtggcataagattagcactggtatgggctgaatttcagtggttgaactgcaccacatgctgaggctcggtcagagatccgagcacattcacaagtactg
>Skav229083
CCATTTTGGggatacccttattggggatactcctattttgagaaaaaaccatatggtttgagtatggccattctctcttcctgaaagggctctgttctccgacaggtcctttgttagccaaattattaccataatgagccaatactgaagccacgatttctggtctgccacacaactagcaacatgcactttaagttccaattagctagcgacaaaatgatggcgcattctctttttatctcacatggcaacccgtgttgttctgatagttcgaaagttgataatggccaactcaactaccattacaccataaaccagctgttcatccgagccatctacggtagATTTTGGATCAttcagcaagttcaaccatcaccagaattaacaactgcgaaccactaccacttcccaacctgagcccttaatgattattactcgtcaattcaccacaatcaaccagtcacc
>Skav220064
ATTTTGGGCTCCAAGcatctccggggcgaacaggaggtgtagggcaagaaaacttgtgtccatcacagggctaccactactggatttttccgtggttggtatagccatagtttgcgcgcgcaacttgtaatttgacgtaggaggcagatgctaaacaataccttaagcaatgcaacatgtcagcgcacccataaccatttgtgattgcAGCCACTTTGGCagaacagaaggaaagctcccatttagttcctttccagaagtgccatgctgagggtgtttcagttcctgactttcgtatgtggagccaactctcagcttgcagagtttgtggagaagaatgcgccaaagggagacattgatgctgccctggactcatttattcgtttcagtgaggcaaaccagttggga
>Skav204158
CCACTTTGGCTGAAGatttaattccccccgctgttggccataatttggcttagttcctgaaagtgccaagaagcattgccttacttcaatgcgagatccgtaatggcaagtctcaccatcagtagtgggattgggatatcccatcccaaaaagtgtgcaggaacctgtgatccccgagtgttcagggttggttctaaaccggactccaggggttctccatgggtcgcaaccactttactcagccaacccccctctggtaatctcaatatctcctattcgccagaaccactatcaaccacaatcaaccatgccacatcatgattcatcattctcaagcactctatcaacaacccatccttaccccaCCATTTGGGTGCTCAAGtcatacatccagctatcatccagcttcctaaccgcaaaccccaaccactgggtgcgctccccatgggtccccaccgctgcccgaccttggtccgtacgcgtgtc
>Skav200739
AGGCATTTTGGggcccaggataccaccaaccagacccaacctaatctgttctaattctaatctcgctgaaatccctggggggtgtcagcggttgccatgctggaacattcagtacgctaccaaggccttgtgttttgagagggttttcattgatgtgtggcaaaaagatcaaacttcgaacatatgtttgaatcaaaaacccacaatgcaaagcagcaaactttgcgtatcttggcatttttcagcgttcagctttgtcggaattgtggagatttcatgagatttcggttgacttgaccacttgaccatactagaattgtcggttttccatactaaatctggaccacttgaccatagatgaaatctttcatttttcatttttcggtacctttcccaccctccctggttccccaaaggcgccgctggtcgttgcctcaCCGCAGCGCTTGTGGCT
>Skav233204
AGCCATTTTGttgctaatcattcccttagaattaccaattcattcccttcgttgcaataatctttgttgggaaatagcctttgttggtactcattcccttgttgctaagcattagtcagtattgttggccatcattcgttccccttgttggccatcaatcAGCCATTTTGTCGCTAGtcattcccatttgttggaaatttgttgataatttggttgataatcaagcatttccattcaattaccaacacaagtaccaacaattaccaacaaatggtaatgcttgaattgttaatctttcactaacaattcgttcccaatggttgcctgaattggtggtga
>Skav207632
ATTTTTGATCAAGgcaagacacttcagttgcttgccatcagcccaaaatagtagcaatggcgcgtgtgctgcttgctgctGCCCTTTTGGCcatcccggcctcggcctatgtggctcccagagcaggtgccacccctccacagagtgcacagctccctgcatctcaagtgcagcttgagccactggacttggaggagcccagccagtctcagagcgtcttcggcatcttgagtgctggcttcggtgttggtgctatgttgggatggctgaccccccgcaggcagcagattgcctccgtggctgctgcatctgcggttgcc
>Skav216621
TAGCCATATTGaccatcactgtcattattagccattatcacggaaaattatcatgacaaaccatcatgacTAGCCATTATGAATCAActcgccactagtcaccatggtaaaccatcatggtaactattagcccttactctcattattagtcagagtcatcaatgcactatcagccattatgatcaccatgcattgaccatcatcaaccatccatattgaccatccatacggaccgttactgtcatcagtagccacggctcgtcatcacggtagacgatcatgaaccactccgaaccatgcgcgggtcggcatcgcaaaacatgtcaccgtcaggctcggtgcaaagcctggatcagggaggag
>Skav207868
GTATCCATTTGTGGCatgcattcccattaggccgcatgctttggagccaacggacgacatgactgcgttggaaaaaaaataatgctttacatcacgctttgcatcatgctttacatcatgctttacatcatgctttacatcatgcTTTGGCTCAAGttgggctgtcaacatagtttgtctgtacaaactcgttttggccgtcagcgtctgatctggcgaggaac
>Skav222054
AGCCATGTTTCGCTtcgggctgctcctgctgatccgcagctgcgcagggtcagccttccagaaccgcagtgagcttcgagctgccgtcgtcgcttgggagcgagatggagaaacttggcgcgtttgtggccatggtactcctaaccatccattaggaaaagggaaagcatcaggaatagggaaagcatcaggtttggggggtacaCCATTTTGGGACAAacccatatgatccgttgaaccaatcatagcttagttttgcctttctgaatgcgagttgtgcttttcaagaaaagggtaagccatgctccccctaaacgtttttttgggacagaatttttggagaaacccatgtattcgactgaacaaatcactggcaagttttgcgaagttgtgcctcaccatgcctaaggacagggctgctttgatttcgcggtatggtcggattgcagattggaatgtttcgaaagtgaccaac
>Skav220319
GCCATATTTGGGTCgtcagaagctgccaagagatctgatttgttgagaccgcgttgtgataccacagcaaccggtgcagggccaactttgctggtccgatgaacaaaatgagatgagttgagatattgaatcagaatgacagactatcgagtctgagtcctggcattccctcaaacatcctcacatttgtggttcccctcgagtacattcCCATATTGGCTCAAGctgcaccttaacctgggtcatcctgggtgacttgatccta
>Skav205864
CCTTAGCCATTcgtaggagtgcacagccgggcatttggagggcacggggataggaggcattcggaggctgtaggcttcagccatgcagtggtaaggcgttagttccacggaattcatcaacctcttcaagctgaagcccacggccgtggccgagcccagtttccaggagcggagggagatccagccactgattcttgtcagccagtaacgtttccacagcacctcgattccaggattttctttgcattttctcctttgaagtgtttctacttttcattttcgcccttcagccgtgaagtgtaaacagtaaacatctgccacggtctgatcatCCGCAGCGCTTTTTGGgcccttggagagtggccagctacgactcggtgcgtgcctcccaaagaggagtgaccacgatgatccca
>Skav228830
AGCCTTTTGAACTCAAagggcaagagcgggtaacatactgtggcctcgatttcggcagccagcggctaccggcgatggcacagcagaccgtgttggaggcagctcggattccagtttgctgctcgccttgggtcatttggatactttgggtggctggcggttttaaaagatcgatccaatcaccaccaatcagcaaggatgacgacttgataagccttaccgcagcacacaatgcagcatcgcaaacatggcccagccactgGTAGCAGATTTGGTTCAAGcagttgcgctgtccaaatatTTTTGGTTCAAaaggcaatgaattgcaaaaaagacaattcagataatacataaaccttccatgtttggtaccaaaatgattgacaataagaagcatttcctttcagcatgtgcttctcaagctgtgccccgtggcttcccagcaggtctttaagaagtttgatgccgacgaatctggcgcgatctcgcgcg
>Skav212397
CCTTTTCTGGCTCAttcagattttcagaagaannnnnnnnnnnnnnnnnnnnnnnnnnnnnnnnnnnnnnnnnnnnnnnnnnnnnnnnnnnnnnnnnnnnnnnnnnnnnnnnnnnnnnnnnnnnnnnnnnnnnnnnnnnnnnnnngagcaaacctatgatgtcagtgtcccgtcccgGTTGCCATGTTGCTGCAAccaccttcgaccgttgttgcaatcaccacaagaaAGCCAGTTTGGaggtcattttgtggctactttggaacagatcaagttgcccaagcatctcgcgatgtttcatcaagctaatgctggttccacgtatttc
>Skav219288
TAGCCATCAGTTGGCTGAAatggtaagaggatggaacaggtgaataagtcgcacttgaagtaccatgaaaagagataaagacttgcagttgaaggcatttatgctactctagtggctctggattgaggatgctttgatttgtgagccaggtgtggttggcggctgagaaacataggaaatccaatttcttcgctgctgcagtgttggaagcccagatgaggagccttagtgggagaagggtttgagtcagcgagctaaagaatcatagaggtatgatatctgtttgaatatctgatagcgagtctaatatctcagatattgaatgggacccggtatgtgtgtagattgtgtgtttagtgtgtgtcgctttctgattgcttgcagtcattccattgaggactgattggttcttgagggcatccttgtgagtttcagatagagttctctgtcgattgaattgccaacgagGTTGCCATCTTGGagctcgcctgga
>Skav212509
TAACCGTTTTGGATCcattgaacaacaactatcaatcgttatcaatcattctcaaccattgtctaaccatgattaaccctttatgattaacccttattatgaatctcttctttgatcaaaccatgatcaaccatgtgaaccatcatgaatcccttatctgatcaaccatcatcaaccatcatcaaCCATAGGTGTTTCGGGTCAAGcctccgctgtggcacgcctggttaccctgtgggtacggattgatcc
>Skav223869
GTAGCCATCATTGGCcttgtatgattagtcattgctagccatcagagacaactgttgacaatagtaaccactactacttttgtcaatattgtttctcgacaggtactaatcttgttacatcgaccaacagtagtcattgctgactggtcctaaccaccatgtcccagggcTTGGCTCAAGctctaactgcccaagaaactttttgttgtgaattcttgcggtaggtcttttgagagcc
>Skav221813
ATGTTGGCTCATTGGCTCAAGagtttttacactcctttcagcttcctaagcagctctgtgtccgggagatctctcagcta
>Skav235621
CCATGTTGGGCTCAgcgttcTTTGGCTCAgcttcttgccaatttgatgcatcggctgcttgcttgaggtcatgccgttgctccacttgtggacaccagtggatatcaattgaatgatctctagatcctatggtttctcaagatatgggtgccccaagatcatcctctatTAGCCATTTTtagtaataaaccaaccaaacattcttaaggaacccccatttgaatgataaacattgtcgtcttgcatttttttctcacggtgtgctgttttcattttttccagaaagatgatccatagtaattactttgatgtgcagcggtgtaactggcaacc
>Skav221807
TTGGGCTCAAGagccagcctccttctcctcaagggatgggaggcaaaggtaaaggcaaaaaaggaggcctcaaaaacacacagctgagctatgctgagctgtttcttgttgctgattttttcagagtgtgcatggcggcgtgcctcaaagaatgcgcgctgcccatcatgaatgctgattgtcacaggcggagatgggatagggcaaccgctgcctccatggatgaggaaaggaggcaagaaaggctcgggcaaatttgctctcctcgttgcatggtgccatatgctgactgtgggaagagaaggagAGACATTTTGGtccttgtagcgcgctgatcagaaat
>Skav203370
GCAATTTTGGCaaagcaggtgcattgtgacccgtgtgtgaCGCAGCCATTTGATTCAActtcgccagagagattttccatacgcaac
>Skav213135
AGCCATTTCTGGggtcccaagtgaccacctcccaggaagacttgcagcaggagctccagaaatctcagcgcctggaagtctgcagctgcctgggcggcccagcattggctgacctggccatggcggtgttggcggccgcaggcagggatcccccatgacatgatgggtcaccaggtcaaccaagcccatgacaggttcgtataatgatatgtaatgattaaatgagtggtgatacgtggtgcttattttttttgcatcaatttcagaggcaatttttcgattttTTTTGGCTCAAGccagtttcagaggcgatttttggagcaactccggcccgctttaacttttggtggcc
>Skav217975
AGCCATTTTGGCCCAgagagattggttagcccagagttggttCCATGTTGCCTTCAAGcgtggccccggcaacagttgcgaatgctgcaagcagtccactgctgtatccaccagctgctcctgcttactatggtggaaacgggtcatatgtaccctccgcgaacgtgacaccgcaggcaggtgctggcttgagcctcactcaagacatcccagatccagattctattgagcaacaaaagcgtgcatatgaacggggtttggatgctgagttagaacagactcgcaaacttgcagaagagcaactgaagcagcagaaaaatgccatcaaacaagctgcagagcagcagctggcc
>Skav207733
GCCATTACTGGCTCgtcaacctacgtctaCCGAAGGCGTTTTGTCTCAgaagaaaacagtggctgcccttggattgtcaagggttatgagcccaagtggagctaccctgtgttagtggtaatctgttgcc
>Skav200597
CCATTAATGGCTAAAGacttggatgctaactgggggtaccccaaactgacatgagaaaccgccatatcaaagagaaaCCGTAGCCGTTTTGGCTAAAGcgttttatgctccgcctggcacgcctagcacagcacacc
>Skav231315
CATGGTGGCTCAAtgagagaataatgtgatggtagaaaggccgcctccctgggcatgccccgtagcttcgcctgcaggacggtgcggtgaggacatgtgctttgaatggtcaggcgctgaagacgcaaaagcgtcagtggaaggggAGCCATTTTtgttttgccaaagtgaccgaccatgagtcaaaaaacatcgctgttaacagaagttggggtgtttcttgtgcacacgcttgattcatggatgcttgcAGCCTTTTTGGCTtaggtttgtccgcccaccgaaccgattgcaaacgatcttgagaggctttaatacgatacggcgaaaccgaaaataacgtgctagagacacatgttaaacgtcatgattttgcagtatagctcttcaagactaactcagccaagagcacagactaatttaaagcctctc
>Skav219519
CCGTGGACCTCATGGCTCAgcaaaggttttctcgaagtcttgtggtcttccgagctgtggaagcagtggcggttctgtggtccacagctatcctcttcTTTGGCTCAgtcggtgaaccatgcctcgtggcagcgaccccggccatggtcgccatgtgcattctgactcccttgaccttgagctttgcagtttctatttccacagcacatgacgtatctttgtcattctttgcaaagccttggtttccagtgatcgaaggctggcagggtggagagctcgaattggcagctcgcgtgggtctagactcgcgagtacattcgttgatggctgctctcactccagacacagaagagtcacacgacattcttggtgcagcgctgtgtcaagcggctgcagctggccacgccaacatcctgatcgccatgtcagatacg
>Skav236121
CATTCTGGCTCAAtgatgttttttcccaaaatcatatggtggacaatggttgattcatactaattcagcgctttttatgcttaatgatggttaatgaatgcgacggtaatccatagacccggaaagtaacctctgatttcttggtcaatgagtcaatgatggtcaaatgatggctagttcatggtgatttgatggccaaaatcagaacttgtgtcgcggtgtagtcaacaagcaccgagttggtgcttttaggtattttggattttcccctaatctatgcaggatgtttggtcgattaacgagtatgtttttgggatggcatatagccaccaaccagacatgtttgggacttttatcgtcacaaaattgatggtagttgcttggccatgttggaggcccggacctcctcggaatcttcgcttggccagtggtacttcgcgcggtCATGTTGGCTCAAGatctgaaaaactttgaactcgcacc
>Skav227396
TACCCATTATTGGCcattacccactattaaaccatcagttgaccattatccacaatcaatttcccactattcaccaaccattaAGCCATTTTtgaccattattacccaccattcattgaacatcaatccaccaccattgaccatcatcaaccatcaattcaccaccaatgagccaccaattcaccaccatccatccatcctcatgcattggacaatcattaactatcacttaccattattaatcattcactctgagctattaactactgatggtcgtaatgtatcaatcagccattagccattctaagcatcattcatcaccagcaaccatcaatcaaccaccatcattaagcaccaaccatcaaccgttaaccatgaaccatggactattcgcacccaccatcaaccaccatgattctggccaagtgccacagtTTTTGGCTCcgaacacagcttcgtctcccacc
>Skav200915
CCATTGTAGGCTCAcaatctttgatttctgctggagggcgcatttgtgcagccagatgtaagatgtgtatgctttcatgcgtttttttttcgcacatgtgaatggttaaaacaagcaagtgtgaatgcttgcgtgcagtccatgcagtccatgcattccatgcatccatCCATTTGGCTCtCGAAGCAATTTGGCTttgaagatttggatcgccttggaggtatcgcctgaactcgagcgcc
>Skav230345
AGCCATTTTGGCTCCAGatttgactcaaaggttcagctacttgcctagtctgagtgctgCATTTTGCTCAAtggcagatctcgctgtgggatatgtttgctgcttagttgctagcttgggctttgccctgaactacttacccgtgaagagcttcgacgtgggccatggcattttcttctccgccgca
>Skav203470
CCATACCATTTTGacatgtggtggtttctcaaaatagggaaccccccaaatcatccactattaaccattcatactaataaacTAGCCATTTTtggggctccctattttgagaaaaccCCATGTTGGCTtccacctgccgccagccccccgaggcgaggcc
>Skav230467
AGACATTTTGGacggtattcaatagcaacaggatgtgggtgcaggaaacaatatgaagactccaacgaaatgcaatccatacatgtgtgactgtgatgtttgtcgcttctatggcactgtaccgatggtcgtaggtcaacatgataaatctcaagaatgggcacatgaacataccggcaagaggatcttgatcatttggacgtgaacggcgGCCATTTTGtttcttgagacgcggcaatttggtggcgcagaaacagagcaggcgaaaatggggctatgaacacagcaacctgacatggctgcttccatgaacaatgctagtcttcaactatcccaaaatcattgttctttgataggaaaccaaggataaccaagggtctactctaggtatacatcacttgagatcaaccacatcactccaaccattcacttgagcatagtac
>Skav204441
AGCCATGGCTGGCTCAtaaacattgaaagctcaggaatgagaagcagcttttaagaaaatagacttgcaaggctcagccttacaaacctgagccattaaaggctggaatatggaaaggtgagctgtgattcttgtaaccagctttgacccctagcaatctattgtctttatattgaaaattcaattcaccagacataagtctcaaagatgcttgattttgcttgagtgatgaaaactttgttatgttttttgtcaaggacaactttcaaccagattgtctttcactttGCCATTTCTTGCTCAgaactcagcaatggaaacaatgccaaatggtttgtttgatgaaagtgattcctattcatccttgttgctgagaaccaagaggagcacttttgatgacaaatggggcttggtg
>Skav213847
AGCGATTTTGGgagatgaccgttctggatttccggcagcaTTTGGCTCAgtcagagcagaaggggctgacacataaaaagttgaggacaatgacatacatgcagacatgatcctaagatctaaggtcatctcctttttgtcatcttttgtgcatcactgtatccccgggatgctgaattgttaagaagcatccacattttcactctcagaacgccctggactacaccccgtgtgcagactgcactctcccattctgcagcatccgccgttgcagcactttggttacaggctttgcacttcgcaca
>Skav218512
AGCCGTTTGGCCCAAGtagattgctgtgtttacaacgcgtgacttcacaacaggaggatccacgtgacagaaatgatggacacatagcagatttgctaactgctaacacttttacagaatgcagcAGCCAATGTCGCTCGAGttctagggttggcaatgttgctgggcctcctaccacctttcctgaccacagcccaactatcgcactcaccaactccgcagttctatcgcagccacaaaaaaacaagaccaacatcatctcgaccacaggtcaccactcaaatcatgaaccatctggaactccccaacatcctacccccaccaaaccaacaagccaccaaccctggcgccaccctgccacctggcccctggcacctccaccggccccggcgcc
>Skav213939
CATGTTGGCATCAAaatgcAGCCATTTGGCATCAAaattctgggagatttgaggcagtccaaagtcagcatggcacggcagcacatcatcacatggctccgcgtttgagcgtcacttttcactctccattcatggctcgcccatgac
>Skav234006
GCCATTTTGtcgcccctttgctggaaaagcctatggaggcagtcatcaattttcaagttcttgccccaagtctcttatgttgaccttttcatcAGCCATTCTTGGgattgcccatcgtggttgaaactcttggtcctttgccactacctgaacttggacttggcgatagccctgtctttcgttgccgttgctgtggccgttatatttctgattgtacatactggcagcgtgcttgccgtggcagagctatctccgggattcctgtacgtttgcttgtatgtatggccagtggcagtcttcctggccgcatattttggtggacacctttgttccagaaagaaatgttggtttgatcaggtttgcatcgaccaggaagatttgttgctcaaagctcggtgtttgcatgcagtcccggccttcgtggctcactcaagaaag
>Skav201855
GTTGCCATGCTGGCTgctacggccatcatcgtttactgcctttccttgtgccttggatgggctgtgccagtgcgatgtggcatggattccatcgaacttggcaaacaaaaaccggatcctgatgtgttcatgccgtatatgcaagttcattcgaaggccaaacatgcgattccaaagcgaacattttttcaagacaaggaagacaatgataccgtacgtctaaggtgagaatctgtggtggaaagagaacagctggctgtttgggaaatctcaagtgaacctgtagaagctggagtagaagctgcagttgttgtgATTTTGGCTgttccctttcc
>Skav227526
CCGTAGCTATTgtcatacaGTAGTTATTTTGGtgaacaggcagcagtgtccgttggatatgaccaaccatgatacggtccatggtcacccatgccagcagctgctgtcaatctgctagatttcagcggtttaggatggtttaggtgcagaacatgcacgatgatcagctgcttgtgtgccggaagggtgacagctcatgaagaggaaactgctctgcccagggtttaccgccacgtatttcacacacacggtttgctggttatttttctagtgctctccttggaacttgtgagg
>Skav219409
GTAGCCATTTaccTAGCCCTTTGGGCTacgggcgcacatggcgttgcggtgctgtctttttgctttgccggcaatttgcgtaatttgcttctcgcaactctcatgaagttgctgcctacgtatatgcgtacatacatagccgatttcctctcgcggtttattaatttttgacgaggtggcatcagcagttgggtattgtcaggagtgg
>Skav216703
CCTTTTTGGCTttgaaccctgcaatcccgttgttggtcgcatactgtatactgtgtacccacccttgctgctgatacacatcaTTGGCTCAAGcactccagtcccgcccaagagctacaaagacagaacaaacttcactttttgaatcccttcgacccagc
>Skav220053
TTTGGCTGAAGcgatcagaaaacagagatggatgtatcttgtcccgttttcgctaatgccagcggttatttgtgccaaaggaactgccccttttggtgttgtGCAATTCTTGGCTTCAAaagagtcgatcatctgtgcattttgagcactcaagacagctcctgacaaagggctgatattgttctgctgattcttgaaatgttctgttcaactgaaaacctcacaaatgctcacacctcaaaatgtttgttgactcacctggcttccgtggaaagataatttcctggctcctccttgaagaccgtgtgcg
>Skav207898
TAGCCATGCAGGCTCAAcctttgaagacatTAGCCATGCAGGCTCAgttttgcagactcTAGCCATTAAGGCcctactcttgaagacatTAGCCATGCAGGCTCAgcccctggagcatTAGCCATGCAGGCTCAAcctttgaagatattaatTAGCCATGCAGGCTCAAttttcaagctctgcaaatcaatttggccttttggcattatagtgtgggatctttgttgcagctggtgcatgtggtgtctccaaacatgtgtggccaacagcagccttgcttggctctatactacaggcaacacatgtgtaccatgatttgctgcaagtggttccacacagcatgggtgtctcacacagccattccaatgcttatgcttgaaaatgattgcatttttttaacaggatggttacagacatgatgtgaatttcccccaacagcttctgccttgcaatacc
>Skav212067
ATTATTGCTCAAGgagctgaagcgtggcccatagatcgactgtgaactttgacgaccggcccgttcagttcagagtgcacatatggcagtgactatcccctgtgttaggttcacgccgtgcgcctgagtttttcatgtggttgaaccatatgtgatgtggtatgGCCATTTTGGCcctatgcccctttcatgttttcccacgagggtgggtatcttcaccaaatgcctgcgcgaccgcgctgtgagaaacggcgcctttgcattctgtgtttgtgagtgacttcgggtgcacttcactggttgggttggagctaccccaacttcacatatatgataattatcatgacaatcctgcaagagaaatcccaacagttcagctcgttcttgtgacgaaagtgagcccatttgtg
>Skav206864
ATATTGTCTCAAGataagtgtgaccatcatacattttcgacggtggtgcacgtgttttcctttcagggcagcaggctcagcgtttttattcttacagtcacagaattctctccagtttcatgtcagcaggttcttgtttctgttgttgtcgtatcAGCCATTTTctatcattttctgaattttcatatgattttgcgacattttaatcctttttcagtgatcatgaaagatgattgtgaggtgtgccaccatagtc
>Skav234201
CCATTTTGGCgaccaaacaataaacttgttctggcctcgatgattttgaagcacccacctttgcacataaattgagagggtgtatgctttcaattgatgaaaaaacacaaacaaatacatgcagaaacacaattcttgacggtagggtggtgcagagatctccatcccaaattttgcactacccataggaatgtcattcctttggtccttgcctcttcCCGTCTCCATTTTGcactctgctggggagcggtgactcattctaacggaaggctaaggcggttatgagcaggttgttgccgtgggtccggtcgtagtttgatcaaggaaacggcaggacatcctctctggatctggttggcgcggttgcattgcagttcttgacccacatctaccaacagatgctaggggtgaggtgccctagactgcc
>Skav222203
TAGCCTTTTTGGCTttctatgttttgctgcgtatcggagcgaacgttgaatcttcaaccaagatctatggacatatattttaacaatttacaGTAGACCTTTTAGCACAcatatgcatatatgtacatacagtgtatatacatatgataggtagcacaggccacagttgctcggtcggactgacagttcacgcttcccttgtccgttTAGCATGTTGGCTCcccaggtgtataggaaaattgtgaaaccatgagtgcaggcagacgacgaacttcccgccatgttgcccaaacc
>Skav219725
GTAGCCACTTGTGGCctgctacgctctaagatagtctagcagccaagttcttaGTAGCCACTTGTGGCTactgctaacgctgttgcatgacatcctctaccagtgactccttttccaaacactcctcttgaaaaatactggtggagtttcactcatgcaattgcttgggaggcacttggtcag
>Skav212156
CCGTAGCCAgcgctgctgttcccgagatggttcacgaattgggtcacgacactcaatctaCCGTGACATTTTGccatgttcgttcatgggatgagctacttcttcttggagacattgagatccacacggaatgttgcaagtacttgtgcagcgcgaggatcttttccagcagatatcgatatccctttgggcatttcagaaggggctgcttttcatggctaccccgtcatggttacagagcaaagggttggagatatcaagccacggtgggatgttcgctgtactcgtgcaggccatttgctgcttgtagggcc
>Skav229974
TTTTCGCTCAAGctttttgtccgacctgtgacttttgggacaatggcgaaccaagacccttctcctttgaatttgccatcttctggagaaccggttgtagatgagccttcttcatctaccgtccatgacccttcattgaaacctttgttacaagCCGTTGCTTCTTTGGCTggtggctctgatgagacaacggcgccctttcagtgtgacccacgagacactgaagttggtgttatggagatgccacggggaagacct
>Skav216417
TGGCTCAAGGCCATTTGTTGCTCAAGccaagtcggttgcgagaccctaccgggtaagattttcacaattcgctgt
>Skav214204
GTATTCATTTGGGCTtgattaccagaatttttggtttttattgtttttctggttatggggttcttgcatgtccttgttgtagaatcaacttgtgattgtcccttgctatactttctgctcttggcgattgtacggattggatagaagaattgaacagaccatgaaatgcaattgttgagtttgatgttctGTAGGCATCTTTAGCTgcatgacggttgatgactctgggcctatgaaagtgacatgagcatgaactgatggcatggtctttgTTTTGGCTCAggcgttttggcacttgcatcggttgcaagagctcggattccatcggagaatatctagaaaccaatctcttcgagcc
>Skav217127
CCATTTAGGATCAtcaacggttgttaatgaataataattcactaagtaatatataGTAGCCATTatctttgtttgaacatcagtaccaatgatagaacagtgatggattgccattggtcgttaacaatcctgctcatcaaacattaaacatccttaactatctttttgactcgttgtcaagcattataaagctttaattatcaactatcgactatcactgttattaatcatatcatcactcactattgtcaaccaggtttcggctctgcttcccagtagcaaccaggatttcaacagaacgagccttcgtttgtttcggtgca
>Skav210830
TTTTGGATCAAGctgtgtggtaaagtgatcgaagtgaatgttgaatttgttttctgttttggctagctttgtggcctctaaaatttgccaactcaatgcacaacagaaacgtaaagctgccacaatcgggttggaatttgaccaagagtggtacgacagcttggtttttgatgggggaatcggaaggaaaaggcgataagagaagcggtttcatgcaagaaagtgcatttgcagacacattcccaacagcacgggcttagtttcgtgtcgaaatggctctaacttatcgcacattttcaccgatATTTCCGGCTCAAG
>Skav216397
GTAGCCATGATGGCTttgaatttctttttgtacgtttcgatgcatgtgcattctccaccgatttcgGTAGCCATTTCAGCGTCAAGagtcgtctagttgagtccttggagtgctttgagtc
>Skav233220
AGCCTTTTGGGCCCAAGtctaaatctcttgtaaactgttcgccacctgcagcttctttcatgtagcccttgattgctccgcccctgagtgtgtcttgaattttgtccttatactccttttcggtagcaaagtctttcacatcgaatcgagttttctctggaatggttaggttgggcaggtcaagcattgagatatccttacattcgtctgttccggccccatctggacaaggatcgcgaacctgagctttcttcttgcagagaaattGTAGCCATCTGGCacttgctgtttcaaacagcgatttctgatatgcctgaatcttgcaccactcgcgaatcaagtagaccactgtgacaagcttgaAGCAAATTTGAATCAAGagctt
>Skav218584
GTAGCCATTTccgccTGGCTCAAGtttgtagtgcaagtttgcgtcgggttgtggttgcttctgtcctatctcttccagcact
>Skav205518
TTTGGCTCAAGacttaggtggcagaatcctgctcaaaacagatttcagtattccaaaatgatctttgcccaagaggacattctgaaccagcgccttgaactttcaatatctcagcCCATTCTGTCTCCAAGatttgttctgagaagggtctggaccaccctaagagcacctgcaggtgagaattcagtgagagtatcttgattgctgaccttgtattcaaatgttgatattcttgttgatgcttctgcagttttnnnnnnnnnnnnnnnnnnnnnnnnnnnnnnnnnnnnnnnnnnnnnnnnnnnnnnnnnnnnnnnnnnnnn
>Skav232331
GTAGCCATTggcttgcttctcaatgggtacttgccAGCCATTTTctctgcagctttcaaagctatagagtttaaagaaatggtgccaaatgctgaacttgaaaggctggaccctcgtgttgttgaaggtttgcatttccatgaagttcagggcaggcggttcaagggaagccaggaatttttg
>Skav229209
TGGCTCAAGtcatATTTTGACTCAAGaatttaggctcgaccacttccttgtcttgtcacggtcatggctgtgtgtgcttcaagaaatactcttagccagctgaccatgaggactcttcggccagccaccacaccagccctaagggca
>Skav205853
CATTTTTGCTCttgccccgtctttcaccaggaaagaatggccttccatggccttccatggccttccccaaatttctttaggcgattcttcgaagttccaaaggcccaacctttgtgaacagtgcattgtttgatctgcggtcttggcctggagcaccccataaccaatggtactcttccacaaaatatctccacacagtgccagctcatgcagcgcacgatggtgattcaaactgagattcgttgttttgagattgcgctattatttttaaaactactaatcttaggttttgatttttttgtttattttgaacattttcttcttggaattccggtgagatgaattctttgtcaacaattcatctggttgatgcgatgtcattctgtagcgatgtcgtTAGCCATTTGTGGCTCAAactgaggcgcctgtattgcgactcttttccccttccaaccgccgcgca
>Skav227956
AGCCATTTTGGCTCAAGtGCCATTTGGTTCGAGggtaccaggccataggtcctgagagtgtgaaattgtctagacatccga
>Skav224114
TGGCTCAAGcaaaAGCCATTATTTGCCCAAGggacataacggcattatcttcggtgcggctcaccaatccgccgtcggc
>Skav210875
GTAGCCATTTggttttggttttgtcttctctttgtcacctgtactgtgtgctgctgaccattttaagcaaatcatcttttggactacttcgaaccaggggtgccacatatcgatgagacattgcaaatctagagaacatgccaaaccaaaccaaggattggaagacattgtgtcatgctttcacgccaaaaatacccggattctcaaggaaatgcgactggaagcccctttgagccgtcaaaattcgcgatcccaaactattcatcgaccataatcaacagtttctaagcatcaacaaggcattcatcaagaattccgaaacgatcctgcacttgatacaggatctgttcagccagcgggtggaatagcttcagctgttgatgtcttgcagctgtagatggtagacttgcatgttgttttgagatagttttgagatgtggattcgtatggaacgcaaaaCATTTTGAATCAAtccacctttgatcctgaacggatctta
>Skav206405
ATTTTGGCTCttggtgttggaggtggaagaaggggcgcacCCGTCGCCATTATTGtaacagaatgatacatactgtgttgatctttgcaacttcagtcatgtcattttgtttggggtgctaagtgaatacccattcaccgttcacagacagctgtttaaatctaaggaccatcccaaacagcatgcccaaagattgcagatacatggccacgcccccaggttggaaggaacaacccacacactttggctggtgaacccaCCATTTTCGATCAgggactgtgagtctccggttgaagca
>Skav234577
TTTTGGCTCgttttggatggaaacggaccatCCATTTTGGggtgctttgaaagtccctcaggatagctggGCCATTTTGGtggcgttgggtttcacatactactgatgtttcccgtgtttgtcattgcgttgagcttggttgcgaattgggtgggctccgagaatgtcacaggtttgactggagaagtcgcatgtgaccatgctgttcctgcgattttgatcgatcctttgggggcagctacatgccttctggtgcttggttatttgctcagtccattcgttggaagatatgaaacc
>Skav220779
TTGGCTCAAGctgagcacttttgggattgtagctgtGTAGCAATTTAAGGTCAcc
>Skav235664
TAGCATTTTGGCcgagacttgccctgacgcctgccaaaagcgtcatcgaaaaagtgtagttggtggttttTAGACATTTTGatcattttctcagcattgaagggcggtgatgaatttttgtcggatggtttatgaccaccaaccagcaaatcatgggggtttgcttcgccgcttgatctttggcgtccagtcacatttactggcgacgcgaaatctttggcagtcggcgaggtgagtcaccaaggaatccacccacctggccgctgtgcc
>Skav205321
CATTTTGGGTCAtctatctGCCAGTTTGGGTCAccaggtgacttgcccagcaaagtggaggattgcctaccacacgacgaacctgagccaacatcttcaacatcttcaccattcccatcatcttcagtagctccaccagctccagcacctccatcacctcctccagtaccaataccacctgcagcctggttgcagctctccaagatccaacgaaaatctcttaatggatcctcatgattgatgcttaatgcttccgaatgcttaagataggatctgttatgtttgctaatggtggatatacatgggtacatgtggatagtgtgcaaatctgtacagtaggcctcataatgagacaggtagattttacgaaagcacagtgagaatcgatgtttgacagttgggttgcaatcgtgccagttcgcgtttgtatcggatatttgatgtttatagaaatatgataatta
>Skav226857
TAGCCATTTTtcagaatatgcccatcatcacttggtgggtgcagaaagccagccgaaaaaattgcccacTTGGCTCAAGcccatttcgctctcctcaagctgatatttgtgctctcgcagacggcaacc
>Skav222415
ATTTTGAGCTGAAGacctgtATGTTGGCTCAAaaggcatatcctttatatatctgacttatcccatgagtcaaagggctacggtttctagacggggctacgaaatgcctcgtccctcaactcctc
>Skav200765
CCAGTGTTGGCTCAgtgtatagtggagcctcccgccagggagcgagaccttgaaccagctcagcttctaaaccttaacggctcagcttcaaaaatccaagaagCCGTCAGCCATTTTGattttcagcatgtcttgtagcct
>Skav218267
CCGTAGCCAaaaaattcttcattgctattcacagatttttttagatatcaacaTAGCCATTTTcagtagaaaattgcttttgcaaattgatatttcgtaagcattagcaatacaattcattaatattcagtccgcaatgaaatcatgaaaaaatgcactgccacaggctcgggctctcctttatttcgacacgtcacaccccaggagctttgttctacatttccaaacacatatggggcatcgtggggcacatgcagccactttccgagctgtttcccattccctcacctttcattccctgctctaaggtagtgggcctc
>Skav223778
GTAGAACATTTAGGCTCAtaaccccacatagctactaggaaacacctataagaTGGCTCAAGatgtcgcagaacccc
>Skav230053
CCGCAGCCATTTcaattacgaattcaattacgaatactgctactgaatttgaataatagaaatcaatgaccaattcaaaactgataagaatagctttcaagtggcaattgaactattttgatgcttgaaaatccaaatcatagatttagagcagcacgactgggtcaTTGGCTCAAagatgatactttccgcaagctcgcacggtatttgtgcagtgctgggttttgtgatgagatgacctgctgttccaaagatctcacggaagctcgcaacattcagctgcaaaagcgcaag
>Skav220251
AGCCGTTGTTGGTTCAttctcggctggacatgttttttcactgtgccggaacgtcatgggcgtggctcaaaattctgaaggcaccaaatacgtgctttcctgtaggcagtgtgaaagatcagttggttggtaccctcaatgatcgtgcttgagccaccgccatatacaatctatattctgtcattcctgttggaaggggtccttggtccatgcacttgctgtagtcattactgaaacaaacagatggtcaggagggaaacgtgctgcattaggatgCCGTTCGTCAGTTTGGCTCtatcatgttatatatttggattgcaggcagaacagtaagctctgtgatgacgaagcattcttgcatgattgggagatatgatcctgtggtggttcagtgctatatcatcatgtggtggttcagtgccatattcatcattttattgcgttgcc
>Skav202922
CCGTAGTGATTTTttgttgacttcagtggcaacgtggagcgtacactatggcaaaccccaagattgctctctgtcaatgggcattgcggaaaaagtctttgatgcctcaagttcatgttcgggaaagtacaggtgtccttgaagatacctgcgcctgactttctagatattggatggcagcaggagcactcagatggacccatgtttcaaagcatagattcatcatgaccacttgcaactatggtgaacttttCATTTTGGATCcaataccataggttacatggttaattgtatcaaagccgtcaggatcagctgcaacttttgagtgctaaatgttgacaccggcacctgcgtttttggctgcagctattgtagtgaagtgggtgaagaacgcccacagcttgcc
>Skav233950
AGCTGTTTTGGCTCggccactttgattctggcatgatggcgaggcctcgctgaacagcgtccagggttgctcttttgaatgagggaactctgaggatctgagcgctttttgtttggccatgcagtgTTTGGATCAAGccgttgagattcaaaacagttgcccagagcgggtttcaaaatgtttcaaacatttcagacaacccttgtggtttcaaacatctccatgcacatgggccctttggactgctttctatccagacccattgtccagtgtcgtgttttcaaaagacgtcgattcaaatacaaatgtatgggttgagcactgaatgcagtgaactgggcatttccactgggactacaccactgaagccaattcgttactttgtttgctccaaagcaggaatcgcaatcaccgttgtttgacgactagctcggatagccagcc
>Skav221932
CCGTAGCTATATTGttgaatatggtgtgtgtgtgtgtgtgttacatagttcatgctttcatatgacgaaaatctgccgaatcctttggcagccaaggcctcgcaagatcggaaagacggcttgattcgatacttgccagacccacgggcactacctctccacatggcgcaactaagtagagatgacttctacttccaagcagtccaagagttgatgctatcttccgttgtcgctcaccggtctcggttgaactcgaaacagtggagtcctcctgcgaagctctacgtggtcgaagttgaattggtccaaagtcctgccctgctggacagctacatttctcagcgctcactggtacaacagcggcgtcaaactgtgagaccaatcaaagacccAGTCATCTATGGATCAAGtggc
>Skav234967
cattgTGGCTCAAGgtgacgcatggctcaagctgacattgcaaccacaatgtgcagtccttatcagcaaagccccccccaggttcacacaggacatagggatgaatcaccagctatccatggtgaaattggctgtggcttataggcacgggttttccatgagtttttctaaccatgtatctacacgtatccatctgatttctaaaaggtgaatcctgaaccatggtaaacctcattgcttccgcctgatcatgggggtgctgtcCATTGTGGCTCAAG
>Skav217810
TATCCATTTTGGtccatggagctggcttttggtcgcattttctgctccttggtcctatctcaacttggaatcCCGTTGACGTCTTGGTTCAcaggtagcttttagccctgcacctttgctctgggcgttcatggcctcatgaa
>Skav213452
GTACCATTTGGCTggtagttaCCGTAGCAATTTTcaccaacttatagtttacttagttcatgattgttccttataaccaccttattgaccagctataattggtagttaccctaataactggtagtcacctagttaactccttaagtcactgatagtaatccttatagccaccttgtgactataggttggttacgtataactggttataactataggttagttaccctagtagtagttacccttgtagtagttgccctagttgttaaatgcttataactctaggttccttagtatttcactataatctactataggttggttacagcatgtaagagaactatagcttagttcttaaatggtagacataactatagtttagttggtcataactggttataactataggttagttcttaaccagctaaactggtagcctagttctgttgaccagggcgcttcaaccaggactggtgcagctccgcctaggcgcatccc
>Skav201095
ATTTTGGCACAtctaggagtatgtaccttggtatctatatatacttgatagatgggttgttttattagagaatttgccagcTAGCCAGTTTGaacgcttaccagctacttacaaactcacccaatttgccctccaaatagattatgtaaattgagaatctatacattcatagatatgtttttatttatatacatatttctttgtggggatgtttatatattgcatgcatccaggaggagatacacatttgcagcttccgattgagagcggtcatccttctggggccgcgttttcgggtaccaggctacattgcaacgacggcaagcagagc
>Skav230891
CATTATGGCTCAAcgtcaAGCCATTTGAGCTCAAGgtcaaacagtcaaaagtcgtggcattcgtctttcgacatcccctttcgaacatgcagtctccagaggcttgggacgacttgggccagggccaggtgattttcttttttgtcgtgtcggtcgtacttggagggtggatctatagcaaatgcccggagtgtagaccacagctggatgatgcaagacgacgcnnnnnnnnnncaagacgacgatctggaggacctgactttgaatatggtcttttcgactgtcaaagcggccgcatctgcttctggggatgctgctgcccacatgttctttggtctgccacggcaagctcacccaaaagcaggttttggggattgagcttttggccg
>Skav233778
CCATTTTGACCAAaactacgcaagatgaacttcttgcacagtggcatccattgacttgacagctcgaggctgggcggatggttatgcccatgagggcgtttctcaacccgtagggaatccccaatgcgatggttgtttttttaaaaaccagttgtagaggtctatggtggatgatctgcgggtaatccccagccattaggaaaccaccatttgtcatgtTAGTCATGTTTGGTTCAAGtcTTGGCTCAActgaggcagctttaacgtttcacagcgatcgatcgatcgcatcctaagtctggtcgtttcgttc
>Skav225963
TTTGGCTCAgccgggagcatttcttcgcagcatggtgCCGTACGCATTGCTGGCTatgctgctggcaagcgcccaagccttcgtcgcgccccctgtgccagcagccccacggagccccgccatgacccagcgcagcggagctgacggattggcacggcagggcacggccacatgggcgtccgtggcggcatgcgcaggggtgctggtggctggcatccgctccagccgaaggcagacgcccaccacgatgttcttcaagaggaagtatggaggacccatcaagcaggactttgaggcagagtatgggccacaataccatggattcaagggaacaggaggcattcagcgcagtgctcgcttgggttttccgaaaggaggccagcagcgagtgatcccaaagctcagtggggcctcctgggagtaccgaaagaac
>Skav224095
CCGTGGCCTTGTTGGCcttacgctcgaaagcaAGCAATGTTGGCGACAAGgaaggtttcaacctagctcaaaccaagtccaaacccagacagattgagaacgatatcatgaggtagccatcgcgctgacctgggtcggacaatgaacatgcgcacatgtcagaaaacagatggaaattgatggggatgacctgcctgccttacagtggccttcggccttgggcatctttgggacataggatgaccatggatgaccatggatgaccggatatgaccggcccaggtcgaag
>Skav220466
ATTTTGGCATCCAGcgtgaaagctggtcaaagcgtgcaggtaaccgcaagcggggctgttgttaactggggccatcagtctccgcacacgatggctggagggttgtacaagctgtgctggtgcactgaccgattcactggtcccaacatgtcttcgcagagcctttgcacatcggcaccaacttacatgtctacggttggaaatctggcactccgtggtcctgcgccactgcagcaggatagaacatgtatcagtggacaggtttgcaaggtcgaggacattgccggatttttctttgatttccttggcgattCCGTAGCCATactcgacacatgtggcaattctccaagacagagtgcctcaagagaaacttcctggtccaagctgcaaacagggggaactgtatactttggttggagttctagtttgctgacaggtggacgttacagattgtgttggtgcggg
>Skav235250
CCATAGGCATTTTGcattcatagaaacatgggttttccataggcctgaaaaacgacaaggaattgaacaatagcaaaagatagcgctgaaacgttgaaactcggcaattgatcttgatcacactggatgaggcaataaattaatctattcgagagaggttgctttactgcttttactggtgTTTTGCCTCAAGaggctgagcaggtggagaagtacaaggaattgcaggctcaggaggtggagaagtgcaaagcattgcagtcacttggcagcaagatgcaatgcatgcaatgctcatgactcaaaatgatgggcaacgcgcctcacacaatgatcacaccaggatcgcatcacttgtgtgcgtgtgtgcttttgtttcctgattccacgtcggcgtgcctttagtgtaacagagcaactggcatgatagc
>Skav228971
GTAGTGATTTTGCCTgttactgtaattacatgaactggctGCCATTTCGGCACAgggatttctgcttcaactagccgcgtgcgcaagacacttgagca
>Skav212149
CCATTTTGCTCAAGcctcctgaaagcactcctcgcgctgtcatttgttggtgtagcatttcaatgcggtgtaacatgtgaatagtgaatgactgctcagcacaccgcagtttgaaaggctcttttgatgcccgacccaattttaacccaccctcgggtatctgacgtatacaggtttctttctcagggcaggGTAGCCATATCGGCctcgcccgtggtgtgttgcgtgcctggccttctgtgctggctgggtttcgtgtttcctctggctgctgcttgggg
>Skav204461
ATTTTGCCGTCAAGaacaactccatgtATTGTTGGCTCAAGgttttaacgtcccaagtgtgagctgtatgccgcaagccatgggattcgtcgcttcaccaggtcacaaagaccagatgaatgga
>Skav219292
ATCTTGGCTCAAagtcatgacactcagacacccttcagtgcgagcagttttcctccacttggctggacctctgcttgcctattggccactcacgatcgcaagtgtataacgaatatacataaccctgctatcttatatacaattgataggtgtggttaacacattcacttcagtgcgagcagttgtcctccacttggttggacctctgcttgcctgctgttcactcacgactacaattgtacacccaaaagatacaaccaAGCTATTTTGTATCAgcatcgatacacgtggtaattccctaggcactcaggttgtcctcctgtcgccacgcagcc
>Skav216932
AGCCTTTGGGGGTCAAGcatatgagtttgagcggttggggccttgaggtgctccgagagctgcgctggtggcaaagccctgcttgcaccagctgcccctggggccttaccatcctaggcctcgttgctgcttgcgccataggtgcctgctgCGGAGCCTGTGTGGCTCtggtctttgcccagggctgccgcgctgaattgcttctgatcttgcgattcgcaagctcattgctgcaacaggggggacctccacctgtgatctcgctgggatcacgcctggctgaataccgcagacagcaataggt
>Skav210769
ttttggctcAGACATTTTGGCacttgcttcagctgagctaagattccaccagatatccagaaaccaaccttgtcgagccaatgcacaaggcccagatgcttctcggagtgcttggatggtgtgttctcacagcagtggggctggtgatggtcttgaactttgattcaagTTTTGGCTCA
>Skav200083
GCTATTTCGGCTCTAAGacacataagctttcaattcgcaccctgttatcagacattttagccagccatgccggcgaagtgcaaaggccgcgctggtgtcccgtgctcctttggaaaggacagtggagccctccgggttggcagcgcatatgctCGTTGCATCTGGTGCTCAAGtgagcgcatggaggcagcctgccgtgattccaagcttggtcggcacaatctggtgaagaccttcaagcagatggccgagggacagcaaggccgtgctctgcagcgaatcccggacgaatttcaagctacgttcaaagctctg
>Skav230705
CCATAGCCATCTTGtggtttttcaaaataggggaccccccaaataatcatccttgtttaatgatgtttattgtttaataacaaaccaaCCATTTTGGgggtccaccattttcagaaaccgctatatttctcactcaaaatgtgccgtaacccgaggttacgtgtcgctgaagagtcaatacggagcgtatgttgtgaccacgcccagcggacgcctagcatgctggcatagagggcatgga
>Skav221255
CCATATTGGTTCCAGgaatgtacatgattcttcttgatggttaaagatggtcgtggtaattaatggatcatggcggctaccaatggtttaaaaacgtggtttggaaatccatgcggtgttgtggtcaattatgggtgcatttgtttgttgacacccaaccaacagtcagtaatcagtaggatcaaagatgacaattcgggaagtgatctattgtgatctatcaccctgtacgctgttgtggaatacccccaaggatcttaTAGCCTTTTGGGCTCAtcctgcgcgcggtgagggctgctgcccatttccccgggtacagttgagcc
>Skav216368
AGCCATTGTAGCTCCAGccacgcaagcataagatttcgttgtagccgCGTAGCCATTTTGGCTCCAGccannnnnnnnnntccAGCCGTTGTGGCTgacccagcaagtttcagaggtagctccaaccagat
>Skav217948
ccatttgaggctcaATTTAGGCTTAAGtgacttaactcactggaatccatcctggtagcagaaaggcaacacaaacatgtatacctataaatcaatatatgtacatacatgtgtgttaaggtgtaagcttcaatgcagcatacgagtaagacttgctatacgacttacaagcCCATTTGAGGCTCAA
>Skav235362
CCTTTGCCATTTAGCCACGAGagaggtagtcttgtgaatatctctcagtttgctacttccacacacacacacacacaaacattacgcatgtatcgcagaaactcatggacaaatgcagtatttctacttgggcatcttgagaaaacctagttccacattgtattgccttagatacttgcgcaacatttttgtgaagcgccgacctgtaattgtccaaacaccatgaccccgcgagtgaagaactcgttgtttttcaccataaaggacaactcattttcggaagcggaatggctgatcaccgagtccaacgtggctgcgttgaatgcacggtataagagacaacgctcttctttgcagcggcacGCCAGTCTGGTCAAGatgaccaggctgtgggactgtgtcga
>Skav228979
GCCAACTTTGGCTCcaatctttgcctttttgcacgtgtctttgggacttttttagacttttccaatctgggtctttcagacgccacaaagacgtttgaaggatccagtcgatgctgctttagtcaactacaccagtgcacggttagtggagagaccaactggagcacaagaactcacaagaactcacaaggactcacaaggacactgtgaaccaggcactggggtggacctggaccttttatgacctcttggtacccctcttggtacccctcttggtactctttgaagcctgcacggctttgctttttccactggctctgcatggctctgcatggctctgtgcttgcaaagaggagctgccacagctgcgcccacggaacgatacactgccatttgctatctgctgtatcttgctgtcctcattgcaagagaaggtatgtcctCATTTTGGTGCTCAAGgtcatccaaggttcctttgaagaaacatcg
>Skav236261
TGGCTCAAGtATCTTGGTTCAAGagtcacaagggtccagcatcctgtgagtttagcatctgacagctacaag
>Skav213220
CATTTTGGCaacatattctcattgattacttggtgaggcttgtacaTGGCTCAAGgcggta
>Skav233478
TAGCTAAATTGTCTCAAtgctcacatatgctcactatcactatcgcatactattgcatactattgcacaccattgcttattattggttggttcacccatttccacatttattgcatacctgcatgctgtatatatccacAGCCGTTTTGACTCAAagtccttcgcttgatgtcgcgcatccttttttgcaatatgta
>Skav231872
CGTAGCGATTTcgcattatttctcgatttagttgtggagagccacttaggagggtCGTAGCGATTCTTGtggcacccgtgtgttccgctatgatttgtacctgttttttgtgtgttattgcactgctttccatggatttgagtcgacgtacagttcaaagttggcctgttcgacgacgcttcgcctcaagtaatTTTTGGCTCtcagcacgaccggtcgaaagccacatttgtccgaaacgcttaagccttaaggagttttcttttctccgtgtatgccttgaatgcccttaatcggcaatcaaagactttcagtttggcttgagaattttcagagacgttctgatgtaatggttggttgaccagtgtgttcgctcgcactgccaacgctctcaaggtgaag
>Skav221205
TTCGGCTCAAGgcctagcttcgtgaagtcagtttacctgtcctttttgaatctcggtgtgctgaacacgtgctatggagaatctctccgggctctctgatgatgagacaattttctttttctgtggttcagcactgctgattgcgaacctcttgatcttctgctacgaggcaccggcaaaatgcagagtgctgtgtagaaagatcagccagcgattgaggcaatgtgttgcacgcgaaagtgtcgcggcccgtgatccagccagagaagccttcattttcaacgaaatgtgcaaaaaaaaAGTCATTTGGGCCCAAtacctcctctcctacctgtacccggtattcactttgggcatcgcatcagtggtgtacaac
>Skav210088
AGCCATTTGGCTCCAGttttggtatgcttatgagcctgcatccatcatccttcgaccagaccaagtgccctttgctccaaccatcccacccagccacaggtgtgtaatgagtgcacaccacaagtacggcttcatcttcacaatggcctccgcaagatgagaaggctgggtctgggctgagatccgggtgctgtcatgctgcaccttgctatgccattcgtatgggaacattaaaccttgctgAGCCATTTCGGCTagtgactagtagatcccttggaggttttcggac
>Skav212116
GTAACACATTTGGGCTatatggtctatatcaacatgtttgtatattctgcatttgtagtgtacaatgtattttatggactacatccggctgcggctcaagataaaagccatggatcaaagccaaaacccacgggcgatccatacccccgattgataccaaaaggcaggtgatccagaccgatccatatgtcgggatcagcgcggaattagccatgcccgttttttgagCCATAGCCATTTgattgtgggtgctatttgagggtcgtgatgtcctacatgtatacacacgtgttctatgtacattcagtaaaagcaaacatatactgccaacacaacaccgtgctgattgcaagtttgatgattcagtcttgcagcccggaatggtttctagctaaggccaccagttatggcagatataaccatagtggctagcaacagcgagtcgcagga
>Skav215113
TTAGGCTCAAGtggaggtaaaggagaggaaaggctacggatatactgacgttgaagatttttacaaaaaggagagtagttgaggttcatctgagctagcaccgctaacccttcgttcacatagacgCGTGCGGTTTTGGCTgtttgccaacgtccctgcacaagcaggcggtcaaattgtccatggaggctaaaataatgagttgcaccccccctgcggagtgaat
>Skav231084
CGTTGCCAATTTGGaggcatgcaaattagcagaatgctggtggaaccagacccacatcaaggcggaagctgctgcggcatggggaggacgggcagaagcagtccaactgcactagagacacaaaaggggatacgcagtatcaaatcggatggctttagctggctttagcttcagttttacccagggggagagttgaagcatctagtcggttcaagcgttttcatgcttacatccatcatcagtcctcatccgatattggtgacaagaagcgtgaactgtggctagagccgtattaatcattagtatgtagctatcactttccgacaaatggattgccatgagctgcgacttttcacttattctgtatgatcttccatttcgctCATTTTGGCTCAAGagacttggtacactttgatcacgttacatccatagggtcaaacctgtttttgccacc
>Skav223217
CCATAGCCATTTctcacattgaaacgacacatttgtgggaagaaaaagtgaaaaggtgcggtgaatgacacaaaagattgacaactgcaccagtccagtgctctgtttgcctcgtggcttggcaatggaactggggttccagccatgacactgcatggtgggttgaacaggatccagcgaccagctgTTTGGCCCAAGattcgctgaagattcgaggcacaggagcagc
>Skav213069
TTTTGGCTCAAGgtcatccagggaaacaaccagcagatgcgaggcaatttacaactgaatggggtagatcgggtagatgtggaacaggcaagctaagtcatttcattctgatctagatggtgaactgaacaggaagcatcccaagtagggtggtaaattcaacttgtcgttttcctgatttgacactttgagaatttttgggaattgattactgatggccatttcataccatttcatattatttcagctgtgacattagacagttttgggggatggtggttttgacaaacatccagatggcaactttctgGCCACTTTTGGCTacgctgattttgacaagcgcagaacctggctgtccccctgtggagaaagattcc
>Skav217206
TTTTGGCTCAAtcttcttccttacctgtgatcaactttgcctgtggtcaagtttgaatagaactaatcctgcacaaagggaaggtagcagttggtgtgcgcgcgtgcggaagtatagtaatgtcaatgccttgttcttgttcattttgagggaatgagcccttggacagagacttggtTTTTGACTCAAtaggtttcaatccattgaagcgcccatgtgaaatccgccaaaatgctcgaattcattttgaatgtcctgctaccctcgatcagagacagagagaagcagctcaaagggaaAGCCATTTTCGATCAAataacgaactcaagatgcagtgcaacatgtagaatccttgtggcgtctcgtctcgttggatcaaagcgcctctctccggccgtgtccccactttcgaagggccggtctcagctcacgcc
>Skav218520
AGCCATGTTGGgcatttgatcattttcagatttgggtgtttcatagtgtctggattgttgtataaagggtttttataaaggatgagagtttctattgtaggaaatggtttctatcatgaaggatgatttggggggccccttatgacttcaaaaaaatatatacaatttacctcagatgaatcctgatgattcaacattgaccattatatattccttgatggattgaccggcTGGCTCAAGcgactgccgcgcaacttccgattcccgtgtccgcgaaaaggatcac
>Skav204065
AGTCATTTTGAGTCAtcattctactccagacccatgtggtgaaaggacaccatgccgaactcatatccagcgccaggctctgcaagaggaagtgaaggcattgcaacgccgggccccaacgtgctttgcacggggatgctcggggcatttttctttgtggaaagtcatgctttcagcttttctttcttggatatctcagctttcacttaccttttttctactcctagatcttcgtgtttccatggaaagcacatggcgtgtggcatgccgttcgttCGTTGGCATTTTGGGCTCAgtggcggcttccaggggaacgatccccagttttggagcatcaaaggagacc
>Skav201999
AGCTATTCTTGGCTacactgatgatggctgaaaattcagataatttgtacggatcgaagatttgcaaaatgtgtagtgagagaaaacatagatgtcatttttttggccagccacttttgaaaccgtcggcttcaaactttgcaagttgcacttgtgattggtggatATTTTGGCTtgacagaaactgaaaccgttcgggtttgcgccttgggccgtcgctagaggggcgggcccttggcaatttca
>Skav200561
TAGCTTTTTGGTTTAAGgaggtggggttcgaaccccatatctcgatttgggggtctcacctggAGCCATTTTGagggtcacgaacttggtcgatttcgtgaccctcaaaaaggggggcacttggagtgcccacaggggccgggaggccctgccccagtg
>Skav230404
ATTTTGGTTGAAGgtcaaaaccagtttcatttcagttgaaacctttgctaaaaacttgcgcatattgccaacccattcagagacagttttttcaCGGAGGCATTCTGGCctt
>Skav230059
AGCCATTTCGGtgagcagacgttcaggatttccaatagacatatatcctttttctggagtcaacgtaggattcattttggaataattagatttttgtgacatgttgttaccggatgctcacgtttaattgccattccacgctgcaaggaacttctaataggaaggtttgtggcggcttattcgaacgcaaagcacacCCACTTTGCCTCAAcggcaaaaacatctcttcacaagaaactgccatctgcagtatggagacgaatgcattgtgggcaccgcgatattgctagaatgatgcttaatcattaattatacagtcagtatgtatgttctatagatattaagaagtatatacatgcctgatggtagaatttctttgacgttttgcacccacttgaccacttgacaagctggatgccccaagctgcatttgaggttcaggagttcatagaaacaatcattccttagcttttgctttcgcc
>Skav205423
CAGTTTGGCCCAAtgtggtGCCACTTTGGCcggttctttGCCAGTTTCCCTCAAaaatggcatggccgggcgtggcaccgttgttttgccagcgcggtcgacgtgattttatggcagaagcgctgcgatcggctcatagagattcaaaggcggatccgatacccaccagtgacatcgatcacggtgggaggtgagaaacatcaacttccattgagaagtgtggatccaccggaggcaggaccaaatcaggaggaactcgagtatttggttggtttttttgatggagatggttgtgtgtcagtgcagaaacatacaaaacatatcaagctatccatcacccaaagcgtggactctgcggagattctttttgatttccgcaagaagctaggaggcgcaattggttttcaaagccatggcacaggg
>Skav207242
CGTACCATGCTGGCCTCAtgattatcaatgagttcaagcagttgcttagctgacctgttactcctaacatccacaaaaacagaataggtgtcaacatgggatgtgaagtgccaacttgtttttgttggtttcttgtgtttatgcattttcatgcatcatcatgcatCCATTTGGCTCAtagggtgcagaaacgtcgaccgttcgctcgttgctaccccgagagttcacaactccagaggagag
>Skav223196
GCCATTTTGcagattgccgtgtgcccgagcaaagttttgaagaggttctgaactgccgtggtttagTGGCTCAAGtccgaaagacgcgagccgggcttctccagagcattctttttcaagcctggtagacgca
>Skav231545
TATCCATTAGGCTCAAcggggaacagagtccgttgaattttatttgggaggaaaccaagtactgttcccgagatacccttaccgattgtccctggctttcgttacatctttttcaggtttgagcctttgctggccctgagttgtgcagcaaccgaagtggtgggattgcgctgagaagtttccacgctggcgCAGTTTGGCTCtttgcaacgaatttgcattgcagtgtcaattgattcaacttttcgttcgaaaatacaccggttttttttgttgcagcagcgaaattaaacagcaatttttcattgatgaagcatgttccacaatatatttcacttgcattcatttcctggcaaacaaatgtaatcaaggccagacaccactcctgcaagcg
>Skav221882
AGCCACTTTGGtgtacgcatcaggcaaaacggtcgcgcttgcatctgagccatctgcggctggtttgcacatgtacactaactcttacccgtcttcttattggtcgtatcgaactaatatgattggcagcaattctggtgagtcgactaaatgatgatgtccctaacaaaacatatccactcggattgcgggttacttgaagccctgtgctccggcgatgtgtcacaagggcatgatacgtgtgaaggctggtgatgaacgattgcgccttaaatggatagacatggatgtccccacatcttgggataggtttctctgtcgatgtccccacatcttgggataggtctacctgttccttttgtaaagtcacccagGCAATCTTGGCTCttagaggcctgtgcatggattgtgttttttttttgtgaaaagtcgttgttttccatgtgttttgggctttgggctttgggtcccggcttcaggggttgttgttggcc
>Skav219534
CCATTTTGGggggtctcccgctttgagaaccccccatgtttactgtcgcgttgtttcgctttgtcactctctagaagagggccttagagtcatggccattcaaacaggaactggcgaccaaccataccggttggggattaccaactgttgctgcttggtggctttcactcatgtttgatgcttgggacgacaggggctacgcctgacccccctgctgtgcttgggaacccgattccgcatcaaggtgttattgatccaggtgttggctagtgactattgtgaactaCCGTAGCCATTTTGGTTGCAAGtcgagttcagagtgttttcaagcaaccagctagtagt
>Skav228389
CCATAGCCATGTTTCGCCAAatcaattgaccccctgaattgtttgccttttgatacttcaagattttagAGCCACGTTTGGCTCCAGtgtcctttcactcgctttgcagaatcgcgagcagtcctttccaccatggggaagaaagggaagggaaagaaaggtggcaaggaggcacttggggtgccattggcagctgcaggtgaggacaactacatgtacctgagc
>Skav217236
CCGTAGCCTTTacccgtaggctacggttcaaggctacgggtatagataacagacacacacacacacacatcagtgtctaaatatacataaacatgaccacttgctttggagctacgccttcaaactgacgcgcagatgggcgatcctgtgaagaccgagacaggtggggccgcgctgcatctgctgtcggactatggtgatttgagggggtgaagcgcagtgtggatcaggtggtcaagtgaagataagtttttcctttggagttacgcagttccgatatctgggtgaaatcatgctttgaggataagattgcgctcgtggggattcggttgatatggTTTTGGCTCAAGgtgataatttctgattgcaagtcgcagtcacattttcctgtcacttttgcaagtgcttcagc
>Skav210275
TTCTGGCTCAAGctagacccgactcattgaagctggcagttcttgagcgtggccttgtgctttggtaggcacgattgaatatcaccttctttctgaataccacccaCGTAGCATTTTcttatcattttcttgtttctcgaggttgtgcct
>Skav226772
CATTTTTGATCAAGcaccgtttcataagcacaaaccaacggtagtggttacgcttgccttggagcaacaatgTTTGGCTCAAGttccacgaacccattcagagacccgagccgccatgcatgtcgtgcagaaacaaatcgttttcgctgaacagcatggactgtttaaatccgcttccgcctggattgtgacctgctctctcctgcaccgcatcaggaagtttcaatgggtgctgccaaaagtgtcgcgctgtgatgtatttataagtcattcctggtcctgtcctaggtgg
>Skav228636
CCATTCTGGAGCAAGcagcaagattgatcaccgaggtcaatctacccaCCATTTTGGgaggagatttcaatcgtccactgcatgactttcctgtgatccaagcccttgttcaattgggttattgctccactgagcaatggtatgcagcacataagcatgcaccg
>Skav216995
TAGTCATGTTTGGTTCAAGtcTTGGCTCAAccgaggcaatctttacgtttcacagcaatcgatcgatcgcatcctgagtccggtcgtttcgttcatggcgactgatggccctggtgaccaattggcatttgacgcaatgccggatgagcacaaggcggaactgcaggttgaccagagccagagcatgagtaatgacagcgatggcgaagac
>Skav213227
GTCGCCATTTGGCgcttgtaaagaatcacatctaaatcatccaacttcttacacaattcagttcacaaatccttggcctagcatttctttgcatttcctaccaggtcgtgcttgcgcagcatggcattgcatgggaattgcatttgcgttggtcttttgtcttttggattcTTTTGGCTCAtgggctgaggctgctgaggctgaggacgtgttttttttgttttttgcttttgctg
>Skav202681
CCAGTCTTGCTCAAGggaaagtcaattcggaagcagccagtttttggaggacacctcatcgattcggatgctgctgaatagtcttcctgggtgaAGCCATTTTttgtggcggctggtctttgaccaagccacagcagcagcagcagtagacaacactgggctgaccttgaccaaagcaacagcagcagcagcagtagacaacactgggctgaccgccgttgagtataggttatgtgtcccacagccattggttcttgttccctcctttttgatgccaaCAATTTGGCTCAAGctgccatgttgcagcatgtccaaacctgataccgaaaactttccgtgtagaaacgact
>Skav232399
TAGCCATTTctaccacttctactgggtgaaccaatccaccattgaccagcatcaaaccagcatttcaccatcaccatgcttaaaataccagttctacccagtgaactgacaggtttgagtatggtgaactagctttcctagggggttgaacccccagtttaacatggttaactagcaggttttTAGCCATTTaccatagttgccatgctaacaactcatcgttacatggttacaaggtaccagttccacagttaccataccctgctatggttttcttggccatttaccatagctaaacccccagttttaccatggccaagtaccccccatcc
>Skav212670
TTTCGGCTCAAGaggacgcacggcactttggtccggccacacactcagacggcacattcccagcactgcttcctgcagatctcggttttccgcaaccaaatatttttttcagcaccggtactggtacaaaagattgtttcgcgcaagttccaaaagttgcttcacaagcggggggccgcatcaaaaagcactagaggaacaatgaatgaacatggtgcgcgccactggttggtgagctgttttggtttgttctagtgTTTTGGCTAAGgttggtgaatctgtttgtttggttggttgcttggtttgcttgtgtgtgtggttgcttgcccagcatcccaaggacccagggattcaccgcca
>Skav213450
CCGTGGCCACTTTttcagttgcagtccaaaggtcatccggattttcgacctcagtgttcttgtatggatcccaaaaacagcttttctttagattgacttgggtattgccggcctcatggttcgcccgcaattttccggcggcgcagccatcccaccaacaaagcatgacaacgatatggctacattcgccatgccacagggatatgaagagacaaggcgtatttcaccagtgcagatctgtgttgctctGCCATTTTCTCAAaacaaaacagttcttgctgcctggctcaaagggatccgcaccatccagcatcagatccgcgatttcatcactccagcgctcacc
>Skav216614
CGTAACTAGTTTGGTCAtttatgggatCCGTAACCATTTTGGCTCCAGacaaagagtgaacatctcctcactctgcaaaaccgaaaccgaaaatgttttcgttcatagttcatggctttgggcaacgtcacttgcgagggcgaagcatg
>Skav201572
CGTAGTTGTTTTGGCagatgtgccaaaagggggagtgcattgggattttaaaagtctgagttgcaccctccttgaaatccagtgaagcccagcatggcttttgcgagacttGCCATGTCTGGCTGAAtcTTTGGCTCAAGtaaaaagaagtgcctgcgcgacttcctgcacaatcattggcatgtttcaagcaagtattgaccaataacaggcaacaattcaacattatgaaccgttatcatcatgaatttcactaccattaagcgccattatcatcatgaaccatgtttaaccaccattaaccaccaccattgaccacatcatcatcaaccatcatcaaccatcatcaaccatcatcaaccatcatcaacctccatggcctgaaggatgtctgtggcgaagccaatttctgaatttcagcgattcgttgcttgcgtcgttccgttgctcgttgggttgccgcc
>Skav223872
TTGGCTCAAGccgggcatcgcgacagcatccgatggaagtagagctggggccctggcagcagccctggcagcagcgaatggccatggaccaacggccatccacatgggaccaacggccatccacctgggctcggccttctgccttcgcaggaccaccgatgcccttcacagcaccccttcaagtagagacccaggccgccgaagaaagtcaaagctttctggatctgggccatgatggtcgccatgggcaccgggtgccatggaagcaGTACGCCTTTTTGGCcatttggttcctgcttttggca
>Skav222940
ATTTGTGGCTCAtaggatttgtgcagttgctgtgttgtgcctcgtcgttttgcaaaggccaggatcttcaagaacatcaggcctgagcatcctgagttttgcaagtgcggaaaaacttgaagagcattctttaggttcaaaggcagatcactcgcagggacactgctggacacgcggatatcacatgtcatcatttttcacccatgtcTTTGGCTCAAGcaccggggttggaagtggccgaagaccacaacattttgttattttttggaagggacggctgcgtgaaccgggcatggcgctgtggctgtcgcgcattgctcgctcggccattgcgccttcccgcattgctcgctcggccattgcgcctttggagcggaacatcaagccagatgagttcatttctttcaacggtggcggacttcatggtgctttcgagattccaaactac
>Skav211799
CCATATTGGCTatatcgaaattcgctctcccactctctagaagagggtcttggagtcatggccattcaagaaggaattggcgaacagccatactggttggggattgccaacggttgctgcttggtggctttcactcatgtttgatgactgggacgataggggctacccctgagcctgctgtgcttgagaacccggttccgcatcaaagtgttattgttccaggtgttggctaatgactatggtgaactaCCGTAGCCATTTTGGttgcgagcctagttcacagagtgttttcaagagacctacctgttactcgt
>Skav205509
GTAGCGGCATTTTGCCTggctTAGCACTTTTGGCTtttctcgacatcgagagttggtctcaatggacatgttttttttcaatcattcattcgaaagaaagacaagaaagatggtcttcaaagttctgcaagtcacattgatggattttgatgcgtgcagcttgttcactccttagagtatgcagttgtcgtcattcattttccttacattggtggccctgtcaagctgctatgagagcaaagcaacggaagcgaggcaagggatgtctaatatatatcaatatgctgttcaaccttatgccttccatatgctgttcaaccttatgccttccatatgcttgttagaaagctgctgacaagaaattcaccttgacaggctgggtCATTTTGGCTacagcgtggcttgtctccaggcttgttgcctcacccttagttgacagtggatccaagtggagttgcaacttacttctcaagcatttgtgccttaaggtgagccc
>Skav211384
CGTGCCTGTTTGCCTCAtcaccttccttcattttcttgcctcaaaaacccatgtgggcagtggcgagggaggaggctctcacagcttgtcatgtgtgactcacttgggacgaaatccgtacctacagcacacacatgtacacacatgtacacactgtatattacttccatttcgtttgagatgagcagttggcaggaacagaccatttcaatccactaatctaatccggccttggtgtcCCAGTGTTGGCTCAggtcccagggtcaaacgaaggtttgtttcggacc
>Skav215304
ATTTTGGCTtggcaattgacggagatcccaaatcctgccccgggaccttttggagctcaaaaacatgaATTTTGGCCAAaacggcttgcagctccaaggggggacccttacccaaaaagagccccagaagattaaattaaaaggaaaacctccatttttgaaccttccccgggagacttgtcttggagggagccgtcagagtcttaccccgagggtttagggtaataccttttactattgtgcccctcgtgggaagctctacctagggttgtactgggctcgaaaggcag
>Skav220413
CATTTGGGCACAAtTTTTGGCTCCAGcaaaaaagtggcttcggcccaaataccgcgcaactaggttttcaggcgtaataggacatatttggtgccttggcgatttatcgctgtgttgctcggcatgttaggctctccgtttgagctcctgaggccatgacgaca
>Skav220719
ttttggctcAGGCATTTTGGCcttcaggcattcctaggattccgctgcagatatcaaccagaaaccaactctcccagaTTTTGGCTCA
>Skav205149
TAGCCATGCTGGCTCAgctgtgtgaatttgcagcctttagcacattagctatttcaggctgtttgctctatgtcccttggctacctttgtatatTAGCCTGTTGGGCTCAAattaggacatgttgcactgtccatTAGCCACTCTTGGCTgctttctggtgttgccaggaatttgctagcttgagcctacatgttctcatgggcttcttctgctcagaagcattttggtgctttgtttttgttgcaacaacatgcacaaggcacaaaacagtcaacaatatcacaacatgctgaaaacatgcaaggctttggcattgtgaaaagcttgggccactgggcttgaagcc
>Skav229761
GCCATTTGGCTtatcgcgcttggtgcgaacataggagccgcaacgtgatgcatttgcgtctcAGCTCTTTTTGGCCCAAagacaaccgttccgatcaaagaccttgagcc
>Skav202403
CCATTTTGGatgcTTCTGGCTCAAagaaaggtcttgtgaccagtagcgggcagtagagatatctggtaatgctttgtagttgttgtgtttagtttccattggagcgggcc
>Skav215807
GCCATTTCGGCTgtgacccaaagatttagaaagcatgaacatttgtccaggtgacacccaagtctcagggaaacacgtgcattggatttggaaaaaagggtatcttgtgattagatgcaggtgtgaccaattgagaattcgtgtaatgatttacggtacctgattctcaaccaacgcgcctctgataccaaattcagttcctcaacttccccctcggacccgatggcagactagttgtgctcagcatgtgacccaaccccgcaggagtactgtttgctgttgcgctggcagctattgatttgttttcccattgaaagcaTTTGGCTCCAGactaggcccgttctgctgtaggttttcaccattctttgaag
>Skav215618
TAGACCATTTCTGCACAAagccccgtgatttacgctctccaaaacttcgggcttggctccaggctcaccagccgaggtgccagctgcaacccaggggttgatggttgatccatgcgcatcgttggcaaagttgattggtttgaagagccagtgcggtataaaatgcttcagggaaaaagataggggcaacaaagccctgatctttggttggtttttgaatggatcatgatggtcaagaatttgtgactgatgatggtccgtgagggttaagcatgaagagaaagcaagcactgccagcaattggtgtgagatccttgccgcacgctactgcgatgcacgTTTTGCTCAAGcactcccatccggcggctacgaagaccgaacgaatttcgccccttcgaatcccttcgaccagc
>Skav209681
CCCTTTTGGCTgaggcactgaccccaggcaagaggctggattttcccttggtgacggagatttgcgagagagcgaccagtgatgtctctgagcTGGCTCAAGtggcagagaccctggaagcaacgttgtccagccaggatccaacc
>Skav233732
GCCATTTTGtgggaaaaacccttgggaatcatcCCATTGCCATGTTAGTTCAccagagggatagagggtatctcctcaggttcttttacgctgttcttcgtattgggcactggc
>Skav202972
GTAGCCATTaataagtggctattaccttctacgattaaccaaatgattatccattattgaccaccagttcctttgttccgcaactgtatttgaactgtggcgctgacctgtggtctcacctgTTGGCTCAAGccgttgcgttggctctaaccacctggtgcactaggttgcttacttctttgtgactggtgaaaataatgtcgaacggcctgttttccagctgctttagccctgcgccgacgtcagtctcggtgcccttcagcactcagccggagtcagtctca
>Skav229772
AGCCATTTGAGTTCAtctcattaatgttcaatgaagccactgccccctggctctttgtgaagatcattcacaggacccccctgcaggcatccctgatgaatcttcgcctatgtgcgttgtgtatgccgccacaattgctcatgaagtcaacggctcacgttttaatgccactccgttcagtgacacgagcaccttctcagtgctttgagagtgcttcagatcgcaaatgactataccaagaacatccaagaacctcgcttggtttggtggtggtgtttttccatgaaaatttgtgcttttcacacggccatgtcttgctgctatcaagctcaacaggtgagcagtgaccatgactcctgtcagctatggccatagagccttactacctgtccattaggcatgatgtgtttgcagcatcgctcgaccttcacTTGGCTCAAGcccggagcatttggggtgcttctgtagctcgtgaagctggggcgaagcccggctttcca
>Skav226452
CCATTTTGGgcttctcaatggatgccgcggcggaaaggatctcgtcgggaaactcagatgaactcctggcaggtgagtggattgaggattcttcgttcaccataccaatgggattgcaggggTTTGGCTCAAagttctgatatcagcatatcattgagctgcttttgca
>Skav230405
ATTTTGGTTGAAGgtcaaaaccagtttcatttcagttgaaacctttgctaaaaacttgcgcatattgccaacccattcagagacagttttttcaCGGAGGCATTCTGGCctt
>Skav222781
CATTTCGGCTCAcagctttatagaggttcgttttaagagagctcctagtcattgatcgaacaggacagccaactggcagctgctgtgatgatccttcatgtcttgtcgaacatggtaacatgttgcatacattttatgaatgcttgtcaggggcaggtttcggacatgctgaaatccatgaagaatcttgaagatctaatgttttgcactctatgtggaagcacgaaggtcttatccaggatcccagctcccaaaactaagaacTTTGGATCAAGaaccccgagttgtttagcaaagaaggcacgttgaaagaaaaagcaaaaggagaaaaaaggagaaagg
>Skav211745
GTATCCATTTCGACTCggacaagcatactgaactgtgaccaaagtctcagccatggcttgaacacacgacataaccacgcagggtcgccaagctttcgtcgagaactaaaatccatgtcgttggatgaagctagacccaaggtttatgaattcggggggtaccatggcttggaggcagttatcatcaaccagaagtatactgatcctggcttagctggacactcgcaaggggtcctttttccgaacattttgttgttgattcctgacccgagacaagctatttgaaggtgtggtacaccagcccagtcgtgggaaatcattgaaaggtcatgatgagggagtgctcgttgaacgatgggcacctccattaaagtatcatgttgtcaaagggttgcattgccacatatatCCGCAGGCATTTTTCCTCtcttgacattcactccaacgtggtggagaaaaacacggaaccaggagtctcgatctggcg
>Skav221836
AGCCACGTTGAGCTCAtattagctttacgaagaccttctaaagtctctatctgatttagcgttgtttcagacaactttcgattttgcgcagctgagaaacgaccggaacagacgtaacacaacaagttgcgcatatggacgcattttgaggctactgcgttgaccctagcactagcacggcgaacaatcgaacaaaacacttcgccaaggattgaCCGTAGCCATTTTGGCTCAAGcctcaaaagaatgccttgcattcattgctgggacatcggcgccggctgcgaccggtgccgccgtatccgccattccagtgtcgctgccccacgagcggccaccacttcttgcttgcgatcgctgcgtgtggagcatagcgcaggccaatctgccacagctgctccacaat
>Skav216838
AGCCACAGTGGATCAAGgccagtgacatacctggagaacaacacctacatcgtgagaaatctctcggtggccagtgcctgggctctgaattgtgtttgaactacaagggacccgaggtcccaaatccctagctcagttgaagaatcaaggactcgaagcgtttcatggcagatgtgcgccgaagccatgaccggaacatgcaaataatcctcaggaggttacacccttgaccacttctgagctaagcagccgagacaagggttgtttgttattgtggtgtttcatatggtcatgatcacgttgcgttgtttcctttgcccatcctgtcatcaacacagcaagtttgaggcatgcaggatcggaacatgaacgcccaatgaggacctttgcagCGAAGCCGTGTGGTTCAAGcgaagggacaaggagattcatccgcccggagggtctatatttgtgctggtgag
>Skav201975
TACCCATGTTTGCCAAGtcgtgaaatcccaatgccaaacgcatccaccgcgctgagaaaggctgtcctttgctgcacatcataaaccaggcaaacatatggctcatctcttgatgcatctcttaaagcacatcattgagcgccatccatggccatcctcacagctttgcggtagcaagctttgccatgcgtaccgcacctactggCCATATGGCATATGGCTCAAGgcttccagtcgcggtcaaacaagaagcacggtggccattggtgacgtttcttcatttttgtgttcttggtcctctttttttgtgtttcctttgtgtgcttccacacattttcaccgttcacc
>Skav203386
TAGCCATGCAGGCTAAAcctttgaagacatTAGCCATGCAGGCTCAgttttgcaaactcTAGCCATTAAGGCcctactcttgaagacatTAGCCATGCAGGCTCAgcccctggagcatTAGCCATGCAGGCTAAAcctttgaagatatTAGCCATGCAGGCTCAAttttcaagctctgcaaaccaatttggccttttggcattatagtgtgggatctttgttgcagctggtgcatgtggtgtctccaaacatgtgtggccaacagcagccttgcttggctctatactacaggcaacacatgtgtaccatgatttgctgcaagtggttccaaaacagcatgggtgtctcacacagccattccaatgcttatgcttgaaaatgattgcaattttttaacaggatggttacagacatgatgtgaattttccccaacagcttctaccttgcaatgcc
>Skav205604
AGCCAGTTTTGGgttttatttgtttatatagtgttttcatttttaaaaggcgccgttcagcattggagAGTCATTTGGCTCtcgatttgattaagttggtcttccaggcaggcagcttctc
>Skav231189
AGCCATTTTctggcgagaggatcgcttcgaaattgttggagaccctgacacttggtgcatcagggcgatacctaagagggcagggaggaagcttcccagcacaagggttgatggttcaaaaCATTACGGCTCAAGccatttcggcacgagacaccccaggttcttagcctgagattctatttgttgacttgttggctggaagagcctgtctccc
>Skav233138
CCATTTTGGgtgcttagcgtttgaacaggttgcgtcaaatccacgaagcctaatcggccaccaggtcaccattaatctttgcttgatcaatcatccatgcgtatcaaccgttggccagcatcagttgatacgaaatgccggtcttttggcttcagcgttgacactgcggagtttcacctgaaacatcctacagtgtctcccacgtcctatggctCCATTTTGGGCCAAccttaggcgtgggagtacaactgggcgctgtgctttgacgcctcaatctttgtcagagatcgggttgagcacgttcacccatggagttaacccacattgacggcggcacagctacacaagtgaactctttgttgaggactctgactctgcaaccaagatacaacatgtaacatgttgctgacaccagttactgtgtccaaaatgtgaatggaaagggaggcaatgcttagactgcctgcgcagacatccttgagagtgaacctccg
>Skav205815
TTTTGGCCCAAaagttgtctGCCAATTTGGCagacagcagatcccca
>Skav205354
CGTAGCCAATGTGGCTtttgtcactgggcttttgccgcaggcgatgccggttgccctgtgctcatcgcagatgtagctggtgccactggtgccgtttccgcaaagagaaaggtgccgagtctgacgagagcgacgtggagcgaggcaatgaccttgaagcaccggtcacgtctccaaaggttcagcacctGCCATTTGTGGCCAAcacccaggatgcagacgaactgggtagtgtggaattgccaagctggcaagtgcctgatttggtggtcgaatgcccaaagaggcctggagcacgcattcacaaagggacaagcctgattttgccggaagccggtggtgatttattagcctgcatagtccggagactgccagtcttactccaaataagacctcgatggatccttgggtacagc
>Skav224944
ATTTTGCTCAAacagtgaaatgaaaaatagaaaccacagacgctgttgcacatggacgattatatatgacgtttttttttctcggcaaaacatcgggaagtggagcaaatcatgaggtggaaagtggaaatacacatatatttatacatgtactggtatatacacatgtataaaaaaacatccaacctattcaatctggtggaggacagcctcaatgttcagtttgtatattcttgtttctacatttcggagtgcattttctgactgtaaaagattgttttccccaactatttgggcactttgaccagatggatcagacgcttaaatcacaCATTTTGGATAAAcaaactcaaacccgaatcgctgacacgtaagcacggaaggtttcagccatcttcaaagcc
>Skav227501
TTTGGCTCAgagccaggaagcatataggatgggagcagctggtgacgacacattgaaacaaaccattctgacctccaagacttgacctgattggaacactaccctccgttggccaagaagaagcacatcgaagcacatcgaagcacatcgaagcacatcgaagcacatcaaagcacatcgaagcacatcgaagtactgaagtgcagcatttgaggaaggcccgtgattgGCCATTATTGGCTgatactctttggatgggggtgatcacagaacattgcgtgaacagctgttgcgtataaattaatggcatggggcaaacgtgtgctttgtcatggcttatcatcgtgtcagcaaatcatttatagcccaaaatttgggtcacaagcggatcctgcag
>Skav229068
ATTTTGGCTacacgcaatgtgcggttttgaccaactaggtcttgctatgctcaaaaagggttcagggttggatgagtccttagtcagtttcatatcattgacaagaaggagcaactaacataatcaacaaccacaacatatctttgtttgcaagagtcatggtacccagcatcactggtggtatccctcctaaaatgattcttatcctttgaagatgttctttttggggaaggtatttctttgtgaaagagtccctggacctgtgcccccactgaaagtgccatgattggcccTGGCTCAAGgccccagcacctgatagtcctgttcatagtttccgagcacgacc
>Skav210380
CCATGTTTGGGCTCAAGctattccttgccatgatgggtgacacctaaggccagcagctgatgttttttcaaacTTTTGGCTCctgaagccgccatgagccgcccctgtgaccgaacgtttgtgaccagctggtggtttcttaaaatatgggacccccaaaaatggctggtttattgttataaatgactactaagagaggatgattggggggtacccctatggcttgagaaacacccaacttgttttggcggcgacctatgggagttgaccatccaaaccaatggagtg
>Skav219057
CGAAGCAATTTTGGCcagctttccgccagagaggcttggaaatggtattcggcttttgaattgagcaacgccactgtgcacttgtttagagtgttgtaggtacccagagccagcagcactttccttttagttgccatgaaggtgttgcagtcgaggggaggtgtcaccctccgggcgcatttgagttggtgtgcAGCCGTTTTGGCTtcagaagacttgcactgcacccggcgtttttgctttcagcttcagctcgaaag
>Skav235965
TGGCTCAAGcttcacacgctgcccccaacgatgagtaattcgaacccgttaccaactgaaagtcatgagcagatcgatccaaaacaaaaaactaaggccaaaagaagggtgcacacaaagacacacacacacaaacacatacatacacgcacaaacaaacaagcacaccacccacagcaaatctcaaagtgacctcgaaggtcagcctgcgcccttgcaggcggcaagttgcaatgtcaagcttgaaaacttccatcttttgcacagaaatgctgcgaggaaagttaaccaaatgcaagatgagtgtgcattgtcagatcggcgtcctcgattgtttgaacaactgattgttgagtgagaagttgtgacgaccattccccacggtagagtcagatagggtcacagtatgtcacagttatgcttggtttcctcgagatcgatgcagagggtaagttgatgtgggcaGTAGCCGTTTTcaactggaggcccagtgcc
>Skav230006
GCCATTTTGcaaatgacggtgaatgatgtacttttcttccgactcctctttacacagtggttccggcatggaaaagtctggcgccgggtcttttCCAGTTTTGGCTggctctcatgacaatcttagttgattgggcacatcattgattcgaccaagccgctgacacgggattgaaatgcttcaagcaaacctagcacagaagcc
>Skav214303
TTTGGCTCAAagagtatgttggtttccttgtcaccgcgctttgacatgaaccatgcctccaaagaaagtgcctatgaagaaaaaacctgtcaagaaaaaacctgccaagaagagtgtgaagaaacctgccgcttccctggcagtcccacatacaccagggcgaagcgaattcgctccaagtgcctacagtgcttcaaggcagaagcccttgggtggcgtggtcgcaacggattgccatggagcacatgctggaattccagactctgtgaatttgcaaCCATTGTGGCTtgatgcc
>Skav209452
TTTGGCTCAtccagggggtcgtcttttggggtgcctctgacgtgtacatagtccggtgggtggtctcctttctgcctttcactTAACCACTTGTTGTCTCAAaaccactgcgagatctttcttttcagaaaccaacatgaggtgattgaaccgaaaaaatcagcaaatgcaccaagtgaatctccatgcatcaaactgtgtgcacgtgttcgcacaatgccatgatcaacttccattcgtcagcattttgtataggtccgtgttagtggagccaccagctgctgttaagactcgccgcc
>Skav216191
CCATAGCAACGTTGGCTgctgggatcatcgcaagcgatcatcaaaatgggtacgggtcaaaaatattatataacctccaatatggccatttatgatagggagtatcaaaatttgacccacaaccaaaagccagttgaaggtttggacagttcttgctcgttgatgcaggtggaaccaaccacgctgatgcattagctcaatggcagttttcacttgcacttcgccttttctcccgatcagtttattatgggttgaaagatcaaagtctcgtctgcctaaaatgaagtcttgaagaacagacactcaatttcctggattctccgcctctctTTCTGGCTCAAGtaaacatctttgaacttcagatctgtcatcgagcggttcctccgctgcatggcgtacatcgcagaagcggaaatgctccgcaagaaactgatcgatgcgtttctgcagcgacatggctttgctcacttgaacgactccagagac
>Skav231756
AGCCATGCTGGTCAAaaattcagctgaaactggttgggataacgacaagcaaccagagaaaagacatgaaacattacagccattctagccttgtgctactaattctctccccccaccattctgttttgaaatgccagggtttttcttcccccgcacagaatgttgtccggtcctagtgaggtatttgcacgcatatgtacagatgtgttacatgttcatttgttgctaatgcatattatatatatatatatatatattcatatctattcatgtatttggttatttgatcatctattttccatgtatatttacaggtatatacacatacataaacccatagcggcatgtgtgatcatgtgtgtgtgtgcggtgcattcgtgcatatgatgcgtgagtgtatgctacctggtgccttCCAGCTTGGCTCAtgctgctgaatttccattgcgtcg
>Skav202565
CCATTTTGGtcgaaaaattgcttggtgatttgttgctttgttcgcatgtcaccagcaggtgccatGTAGCCATTTTtcgtggtgtccctgtgaggtgcccgccctgccagcagctgaagcccttgatccatcgcttggcgcagctgctggnnnnnnnnnnnnnnnnnnnnnnnnnnnnnnnnnnnnnnnnnnnnnnnnnnnnnnnnnnnnnnncccgcgcttgccgcggctgctggcggcggagcca
>Skav200766
TTTGGCTTCAAGcaatCCATTTTGGCGTCAtgattttgtccgattcaaaaaggtgtcctcaccaaaagggtcattattctactacaacatcattttgggatgcttacagagtttaccagaccatggctttggtttcagcgaaactccacactgcgactgcgaccaggttcaaacttctgatttccaaagccaattgaagtttagcttagcaacagggggtgctgtgttttgagatgaacctgaatctacatgggccatggcg
>Skav218553
atcTTGGCTCAAGggatccttggggtatctttgggtcggagaacaaccagtcaccgaacttggctcaaggttccctttcgcacctaagagttgcgATCTTGGCTCAAG
>Skav228939
TTGGCTCAAccgagcctttggggagtgaaggaagatgccgcagggcactcttcaatctggggctcggtctgttgacgcagaccagcttacccagtaaggaaaggcaaggaaaacaactaaggaacgggggcgacgggcaggttctgtcagggttgcctccaaaggttttcccagccaggggctcaaccatgtgtgtgagccgCCGCAGCCGTTTGCTCAAGgatgctttcagctagctgggagtggggcgattgggtccttttgtggatcatcgccacttctgttttagcccacgtcacgggcggctggtggct
>Skav219611
CATCTTGGACTCAAttgcatcctgtgtgggtggggcagtgtttgtgaggctgcagaggttttctgatgatgatgatgatgatgatgatgatgatgatgatgatgatgatgatgatgatgatggaaatggaaatggaaatggaaatggaaatgacccacctctgccctttgacAGGCATCTAGGCTCAAGgccgctatgaaccgaatttgtagaatgtgtgctgttccaac
>Skav206612
CGTAGCAGCTTGGCCAAcaattcatcaatataactaatagttgttggttttaaacatttccctagccttccagttacctttatagtaggtaaccaaccctacaaaacaatggtagaaaccagctggttacctactagagaggtaactggaagggtagggtttgttatttttgcatggggattattaacaaacggttggttgactagtatgtacccatgatgtgtcagtggtatactcgttgctcatccttgttgCCGTGCAGTGTTTGGTTCAAGggaagttggggggaggagacccgctcagggttcctccccggtggcaaggccattgaggcttgccgccaaa
>Skav201653
GTAGCTATTTGGATCtgggcttatgctggttgagcattgccctccagtccacgtcatatttctttgaggcactaccgctgaagcccatgaacgcaagggttggtggagtgacagttgaatgttttaataaatgatgactggttggtggtttcaaactttcaccagtgattataaacaaatagttagttgactataaagtatttttcgtaggggttgaaaccaccaaccagatgatcatggatcatgagtagttgtgatcagtaatggcttggaagcttcatggtaatgattgatgtgcggaagcagtgcagatgggaggccgtgtgtggctgtgaattctggcagTTTTGGCTCAAttttcaggcttagacacgtgacttcatgcatcgctcgtttcggggtcagcagcttcacaggcgtttggcgctggcagtggtcgccacatttctttggtccaatatttcctgg
>Skav226657
GTAGCCATTCTTCGCcattctttcctcatcctgaaccatttcgccagatacaactggcgccatcggaaaaaatggggaaaacgaagaagtccagccgttgatctcatgGTAGCCATTGTTGATCTCAttgatctcagccattgaagtggctatgggtcaagcagttaaccaaccaatcatagctagttaatggttaataataggggatgataactaacaactataggggatatatgccaattaaaactatatggcgagttaggtcaacattaactaaccaactagtaggggagaataaccaacaatagtgggtaaacaatggtgaatgatggggaaccagggggactaggggtgaactgacccactgccaagtcattggttctgacatgggaaaccggggtgaagcacatgcggcttccaggtgtgttttg
>Skav218635
GTATGCATTTTATCGCAAGaaataggtccgaATTTTGTCTCAAGaaatagctatgaacatgtatgaactttatctcaagaaatcggtatgaatatattagacaatattccttgtattcatgctggcgagtctgaatctttgcccataccaacgcacgaagatgagggttcacggcgcagttacaccagttccagcagactacaacccaggtgatgagtgtttctcatctggtgacgatcgaacgttttgtttcaacaatgacca
>Skav209359
ATTGTGGCTGAAGccaccttcgcagacccaggggttccgcagttggagttcagtgccctaccagcaatccacgcaacgtcctcagataggtggcatatcaagcggcaaattcatgaacagcatttccaggacacgaccagccagctccaaattttgtctccgattccttgtgaagccaaccaccaacatatttctcaaaaggatgaacccccccaaatcatcaattatgaaccagttatagtaatcaaccAGCCATTTTGGgtgtccccaaactggcttgaggacccccatatcactgtgccgccc
>Skav228307
CATTTTGGCCCAtaccaatgtttgaaagttcaaataccatgtagtgagttcggatagccaattcgcccgacattgaactgagctttgatggcagacgttgctactgtgctgcTTGGCTCAAGggtggtgccacctttcaacggctctgatcaaagggtgaagttccaggct
>Skav227431
AGCCGATTTTTGACTCAgatttccttcttttgcacagGTACCATTTTGcaccaccagccggggaagtatcctccaacatgctctatgcaagaccatccaccaagggctatatgattccatggtatgcacacaccacttcgtcatactgggcatttgacatgtttgcggggggcatcggaggatggcatgtcgcactggattttttgaggtccaatatcatgccacatcactggatggtttctttggagagagattttgccatggccaaacagcaggccatcaatttgac
>Skav232436
CACTTTGCTCAAGgagctcccccttgcatgcaggaagtttgcagccaaaaaagaccggggtggcccgctactgcaaattatcaacgcctgctatgttgcacatgttgcgtcttgcactgttttgtttcatgctatgttgcacatgttgcgtcttgcactgttttgttgcatctacaatcattgcgtgccatgcttactgttttaggcttttgcaaggtgctattgcaggctattgcatctccgatcggaagtggatcctgcccatttcttgaccatccgcactttagaacttatctaggcaatcctttgcttgtcaatttgcgatgatttgacatgtgagagtcgagtgctggtgttggggttccactacaatcctttgcaggTTGGCTCAAacagaggtttgcggctgggtcacagtctctagtctgag
>Skav205695
ATTTTGGCTCcgtgtttgggttcgtgttgcctttcgtgcagtctcgttttcactttgtggaggttgggaatgtctgattggttttctcaaatatgtcacatgtcatgaagtgaacttgacgcatgttgttggaattgacatgcatattctatcaggaacaatgaatggtgagacttacgaatatttcgcaaattgcaaaggaaaatatatcctgcttttcgtttccaatcaaccacttcatgtgattcTTTGGTTCAAGgatgttcccagaaac
>Skav216937
TTTGTGCTCAAGtcacaagcgactccaaagcagataacatcctacttccctttccattgatacacacgggaattgctgaaaacaactgctgatatttgctgcattctgtcaccagcgccgatcagatcgatcaacgatttccagaTTTGGCTCAgaacagttttgctccgccccgcgctcgccgcgctcgcgtgttctgccg
>Skav207536
AGCCATTTTGCTCgtccctgaaaagtctcgtcctacgcgcggtggcgccagctcagctcggtttgttggttcagccaccaatgttcatcagcatgatcacgttcgagctggtaactcctccactatggtaggtgctcagtcatcatccaagtagcatgtgcatctttgccctccaggctcaccggaaagcgaaagattgtcagtcactggagaggatcagaatacattggcttggctacatggggttctctcgagtcatagggggacccccagttattttttagtaagaaaccgaCCATTTTGGagaggtatttctttttcaaagcaaccacgatatacgtttcttttcaactctcatcacgtcccagcagcacttcatttgaaagccgctccgcagatcatgattcagtaaacctgagcc
>Skav216755
GCCAGATTGGCTCAAGagtgtacgtcctgacgcagctggagaaccagtactaaataactattacccatagttaaccatatgggtttgtatttttttgaaggggtcactcaagtagacttgggctgaagtagggcccttcgaagcatacccccgaagcatacccagaagcatacctccgaagcataccctccttactacttcaagcagggggtccctttttttttaaagatataccaacatttaattgaccaaaattagcatatttgatggtcaaccagcattattggacattattattagcctttactaaccaGTAGTCCTTTTGTGCCCAAGcttcccagtagcggataggaatcaacagattgggccgacaccattgtagcc
>Skav214093
CATTTTGGCGCAggagatcatcatgatcaacgtagcgagcagtgcaactcagtggtgaatcatctcttcccccatggggttttgacccacagccatgttcaacagcacccgtttgaaaccttggattggtccgaagttcctggctatttgacttggaaccttggattagctgtcattctatgatcatgtcttcctcttttggaagcggtggcatgtggcaccatctttcaagctgTTGGCTCAAGcgcc
>Skav226669
TGGCTCAAGtggaGTAGGGATTTGTTGCTAAAGttgccatcgtcttatagcattgttgtcgccatgggctggtctttgctgcctcttgggtgcttagtcttcgctcacaac
>Skav210846
TAGCCAAATTTGCTCctttgatgctggttttgctcctttgcgtggctgcgactgctttgcgctcctgctcctctttgctgttgtagggatgggagaggcgcgtcatgttcggaatgtgctctcttgctggagagccgcagcggtgcgaattcctgttcgcttccacccaatcggctttctcaaggcattctcatcgtcatcatattctggtccatcggccttatcgtcgagacgtgcaaggattctttggtgacctttgggactgggatattcggaaatcatgagatctttgcgaaggccgccacttgagtgccaagctttcgtttcttcttcagtgaacaggtgcctgtataattcgcatccacttgtttcgggcaatgaCCATTTGGCTCAAGtctttttcaaggaacaaattcataagctggcttgcgccggaattctttgaattctgcg
>Skav236207
CCATTTTGGaagaagtttttacagggatcgccacaggtcctgagcaagttgcagtgacagcttccttgaaggctgagatgctgacgttggaggggctgttgagcatggcCCAATTTGACCTCAAGagcaaggtggaccccgtggtgacctgcagcgatgcctgcgagactgggggtggcatttgctatgcgtcaaggctctcaccactgggagttgaagagacacaaaagctgctagctggagagttggaatcaggcgaaggttggcctgaccctcacagcctccccgtcaccgagaaggttctggtgattgacctgtttgcgggcattggaggtttcagcctggcattgaagaaggccggagtacct
>Skav231736
AGCCATTTTAGGATCcatgaaccgctagcagcggcagagcatggtggtaatgaacaatataaaatagataatgaatgaccattggctagctgattattgtttgtggccgcagcatgatccatgactatcattcctctttcatattttGTTGCCCTTTTGGCCAAagtcattttacgtgaacaatgaggatccaaaaaaaaatcttgtcccagctcaagctttcttgggcatttttctttttgggttggctaaaaagcagacatggatcaaccaaccacgaggcttcagtaatcagcaaagttagtctaccgctcagttatcctcgtcgattatcatttattcacgtttactctgagacatttgcatccatgatctcgatacatggctcgtaatttggcgacaaaggatcgccatttgaggcgtc
>Skav232979
GCCATTTTGatgcagtgttttgttcggggtgtctgggcagattgtgagctacttcaagtttgaggatcatttttggtcagcCCATTATTGGCTtggcatcggtcaagaaaacaggtagcaagaaatggacccgacatgctggtgaatatgctggtccatgttctccggccaagtttgctgaagtgttcaagctttgcggtgccatttgtgcatc
>Skav210644
ATGTTGGCGTCAAGagagcgaacagcgttctgtcatttcacattgctaaaataagaCGAAGCCAGTTTGCGCTgtgcgtgctgtcctttgaccttgcagtgacttcgccgtgttcaacttgtgcggtgtgtccgcaggtggttcaaacgcaaaccccttgcagctatagccctctgtgtctgcggtgtgaccgcgcggagccagcggtgtgtccgcgctacagcttgcttgacgcatatataggttcaagcaggttcaagcgggctccgtcgcgttttcgattcttgctgcaccatggacgagagtctgctcgctttcgctgtggctttagctacagcggcctctgcgtggccagaagagcagcggcgcttg
>Skav232139
tttTGGCTCAAGcctggctcaagcgtgagatctctgacatccgatccggtcgtgacagaagtagcaaggagaTTTTGGCTCAAG
>Skav208927
TTGGCTCAAtctctggctctaggtgatgtattcgcaaacaatttgcatcatgatatgcagatgcAGACATTTTGGCTtcaccatataatcaatcagacaatgcgaacccgtaaacaattcagaatgactgtccctttcttaaatcgacaaggttgagttctctcaaaaacgtcaattttgtcaaaagatcgttggctgcaggatttgaaacctaacatgaagttgctgacctctgcctcaagtcagaaagcccaatgttcacctagatgttcccgaacaaaacctacagttacacacgttatcccacgatatcatacgacaagtcaaaaggaaatcgccgtccaggcaagatgtgaaatatttatgtttgtcactgctgctggctggtgacgccgcagtaga
>Skav222027
AGCCATTTTttggggcccccctatggcttgcgaacccccCCATTTTTGCCAAGgccctctgagggtcagccccttcgcaggcgacgc
>Skav224462
TAGCCACGTTTGGCcaccaagcattgaacatcaaccgttagccatcgtgttgaccttattaattccaggtttagccatcaaccattatcagattaagttatccacttcctgatgtatcagcgtgctatgactgggcagcgctttggatgattttggtacagctacagcctgtttggttggccgcgggtttgggacctgttgtgtgtgtgtgtgtgttttttacatttgtgattatggtaaatgatcatggtacatgatcatgaatcatggcaaagactttaggtacattatcaatgtttatcAGCCATTTTtatcacttgaacatcatggtaaaggatcatggtcaataaacatgacagtatgatgctcaatggttgggaatggtaagcgtcataaatcattgtccatcatggtggagaaggaca
>Skav200717
CCATATTTGGATCAgaatcgcacgaaatgactggaaatgaacaaacaactggttgtgggtcaaaatcaaccaaccaacaaagggatCCGTAACTATTTTGGTCAtttatgggatCCGTAACCATTTTGGCTCCAGacaaagagtgaacatttcctcactctgcaaaaccgaaaccgaaaaagtcttccttcatagttcatagctttgggcaacgacacttgtcgaaggagacgaatgag
>Skav201746
CCATGTTGGCCCAgtgcttgctggtgggtcctttcactcgtttcgctatgcaatatccacccgtgcggcatCGCAGCCATTTgatctcgtaggttgtcatgttccgccgttagagatcgggtcggttgctccatcttcct
>Skav208862
GCCATTTTGtacatggtcagttttggtgccaaaacaatgttaaatagtggttgatggtttcagttgatccccttcctcccaatcacgtgactttcaggttgtttccaattgcgcctataagtttcgaagtctaaaatctaaggctacttgctgactggaaggtggttcgattgatggaagcagatcaatgacacccctttgtaatcagaagcatggtttgcagcacaatctccaagtaactgtgttgcgaagTTTGGCTCAAGctgcattagtttccgacagttcaactcgctctttgcttcttccgcg
>Skav209039
TGGCTCAAGaccatgaagatgTGGCTCAAGaatgtgatgccagtagtcatatagcgattcagttcagaccaggcaaattagatcaagctagcagtttttgccatgccctggatgacattctcttcaaactgttgctattgaaagctgcttccatttcaccttttcctccacagaaagtcatgcaaagggaactgtattcggccgcggggtgaaacacgcagtgctcgttttcaggccatctgaatgtgatgcgtgacttttgcaacacgccattcctcttgagcatcttgctgcatttgggcggatcttccttcaa
>Skav234034
CCTTAGCCACTTATGGCcatgatatgtttatgatcttgtcttttgtcAGCCATATATGGCTttttgttgagccatccttggccatgtagatagtttgaatgccagccttccatggccatgcatgcataccatgcatccaactcctttcagctcacaggctcaattgctcagtgtgccagaatgacattggtgtttaatacatatctgccagttccattgtcaaacatgttttttttcaatatcatttccatttccatgcctttacatatatgccatttccatgcctttacatacatgcacattgattcaccaacattgatttcccacaccagccttgtgacc
>Skav228070
TTGGCTCAAGggtccccagctgtggcaatttcgtcgggGCCATTTTGGacttccctgggaagtcgcggcacggcc
>Skav236117
CCGCCGCCATTTTTGGTGAAccacacaatgggcgcccggcagctgaccaggaataagtttgaaaggatggttttgccacccgaggaatgcagtgacattgccaatGCCATTTTGGatggatgcgatgcagtg
>Skav230937
GCCATTTTGtgtcccgcactctgggtctgcaccttcggccagaattctgcagagcgttctcaCGCAGCCATTTGGGGTCAAtttgtgatatgtcagaaatc
>Skav215932
CCATTGCCATGTTAGTTCAccagagggtagatcatccttcagtagcctcaatagccacgcctcgctcagctgcattaccatgccattctcccgaagtagcctcaatagccacgccttactcagctacattaccatgatcatccatgatCCATAGCCTCTTTCAGCTCAAacctctttgctgccaccccaaagcgtttcttcccccgtcatgtccgccacc
>Skav212657
CCATTTTGGtcggttgggattgggcctgccctggttcagtctcgcctgtgcagaaattctcctcgcgtttttttcctgctgtacatccagccgtgaccagcttttcacctacaaaccaccaataacaaaaccaccgaaaacaatttggtatcaaagtggctatgcccctggttgttggcggagcagaaccggtcctgatttttccccgttgaccttgggaaaacctgcgAGCCATTTTGGCCTCAgctccatcgatcacctctccactagccccaccaatctccacc
>Skav201814
GCCATTCTATAGGCTCAAatgttttttttctatatgcacttataagttttggaaacttccgcctccgcctcgtgcgggaactatttgtagacgttaattctaggcgttaaccaaccatactagagacatgcAGCCATTTTtttgatttgacatggtcaaccgccagctttcaaccgttcactttctgcaagatgccgagcctattgcaggatgaatcatggtgtgtgtgactgattgtgtcgcattttggtgcattgctgatattgctgaacgctctccaaacacaaaaggctcgcctcaaatttgtgcatcaaagaaagcttcctagaagggccccgattgcagcgcaacaggaaatgatccaaagcaacatacaacaaacatcaataaatcaaggttctccaaaggttcctgGCCATTTTGaaagttcattgtgctattcagccacgtcctcgccctacattcgcttcaccagccacacgcttgctgtgcc
>Skav201580
CCATAGCTTTGCTTGGCTCAcagctgtaccatcccctaaaccaccagttgctttgttggaacatgctgcctgtttgggccatgatgctggtgatgcctgcctactcccagactgggcagtggcaagaagtgagggccaagggaacgccagagcagcgagcataCCATAGCGCAGTTTGGgttgatagtctcaaaggcatgcttgtccttggaggatggagcaccaccaggtatgggatcgcggaggcgaaagggtcccagatggatcgttacttcagcgacttgcatctgtatcatccggacagccatgagtggcgggagctgcaacccatacggcggtttgggttgacggccttggc
>Skav210085
CCGGAGCACTTTTGGgagatgcaacttgcatggagggtaccttagataattattccaggtatacccctcacgtcacagaatatttttttaggaatacttttttaggaatattttctggctgggggtataggcacccccccgtggggggtatacctggaataattttggtgcaacaatgagtccataattattccagattcatgtttgtttacccacaacatcttagatgggttaaatattagttggttgcttggttgcttggttgcttggttggttacttgcttggttgcttgcttggttgcttgcttggttgcttggttgcttggttgcttgcttggttggttgcttgcttggttgcttgtttgcttggttggttggttgcttgtttgcttggttggttggttggttgatggcttgctggcttgatgatgctaCATGTTGGCTCAAGcttttaaacgctcgacgcctcgcaccgcacgactctcacctcatctaacc
>Skav214916
TAGCATTTTGGtttccagctaccatggcaagtatgagtcaaaaaaatagtatcagcggggcaaggagtcagcccggagccttgatcatccatgtacctcagagatataccctcctggaaaaatgtggtgcagtgctgcagtttccacagcttgcgagtttttggtttttatgcgatctgcctgtgtgtgtttttttggttgggaaccctcaaatgcttcagtctttggttcccatgccaggctcacctacttggaagcagtcataacttccttgggaagtccagggctgggcaccgttcgcgaacaccgtgatttCATTTCGGCTCAgtttttcatatagctgcgttgctcccaacagtttcgctgggccgcgctacccgtgcgag
>Skav211219
CCAGTGTTGGCTACAAGatgttttgcttacttttggaaaccaatcgtgactcaagggacggaatacgaaagcacttcaattcatgcgcattcactacagtacctgcgccaatatcctgtgcaagagaTTTGGCTCAtccagatttgccaacaaaatggacagaaacgaccacacaatgctgagatatggtatcctgatctatcctgaacgatcataaacattcatacaccggttatatatatatatatatttatttatatatgctttcttgctattagagagtgatggtttcaagagttaaatcgatgaacttaaccccgtgaatcacaccactccaccaggaactggccaacaaattggcgcatggggctggtccatttggcatcatttggccacccaaaatggccgaacttgcagggtttagaccaggggcgaggcacagttgttgttttttttcgtagagcagtgcctttccgctgcc
>Skav219577
CCATAGCCATTTagttggtatatcccctagtaattggctggttgaccattagccagctagttgaccatAGCCATTTTggtatattttggtatcatagccatacagttgatattttatatatatatatatacacggctcaagccatttttttggttcgagctgtgtgttacgaggcccgccagggcgatgtggtaaatttctccgcCCATAGCCATTTTGG
>Skav205538
ATCTTGGCTCCAAGctgaaggcacattgcgcattcaccatggcgtttcggacggtgctgtcgctggcactttgctcctctgcttcagcggaggttgctgctaccaatcggtcgcatttccggggtcgcgcttcgatcgaggtgtcagccctgggggcCCAGTGTGGCTCActggacctgacgcagaatgacaattgccgtacaccgaggcatcagtggcagatttccaacgactctactattgtgctcctcctggaaaagacaaattttgtggcttgccgccttgcaccggttgcagcaaccctccttgcaatgactgctttgcagggcacccactctatgcctcattgaggccagggtgtgatggcaacaatcgaggcattgggtgtgtgccgcccaagacagcc
>Skav227893
CCGTAGCCATTTTGGCTCAAGgaagctttttgctcaAGCCATGTTCTTGGCTCGAGaggcagcgccttctcggcagctgccccctgagcggtcctttcccc
>Skav230661
TTTGGCTCAtacttcaatcaaagccttcaaaatgtgagcctaccagatggcctccaaagcttaacgctgggccacgcctttaaccagagcttggaggttctgcctaagcagctgcaggtcttgaactttggaggtaccaaactacggtcaagtgttgacagacagctacagcttcccagtcttcgaaagctgtccttggcgaagggcttcaatcaaagtttggatggcgtgatttttcctgaaagcttagaagagttgatccttgcgggagatttcaatcAGCCATTGGATCAAGtgaggttcccggaaagcttgcagtgcttgacactggctggcgacttcgatcaaagcttagctgctgtgaactttccagtgaaccttcaggagttgaagctgggttttcatttcaaccaagatctggaacctgtgactcttcctgtgaacctccggcacctttcgttgggccac
>Skav200776
CATTTTGGCTaatgacgtttgccatgctttatcatcaaaagcaacatcatcgctatcagcatcatcagaagcagcaccagcagcaggatcagcacttgcatcagcatcataatttaaaccttcactgtggccgtgcgctctcgccgaaagGTAGCCTCCTTGGCTacctctttgctttgtaaac
>Skav218403
GCCATGTTTGACTGAAaattgctttaagaaacttgggggcaatgatcccacccaagcagacaggctgaaacaataaaggtgaaaagatcggcatcagcccttgatacgtcttttctcgatgctcttgatgtgggatgtgttgctgggactgtttcacgaccttgctgTTTTTGCTCAAGtttgtcattgtcactgcccgaacgtgccctgcaacggactccaacagttgctgccaccgaa
>Skav211970
GTACCCATTTGGCagccagtaggtcagactgcacattaggatagggatcgctgacaggcctatggtgtcctacatgtcctcagtgggactttgcaggtatcacaagtccattgagcccttggtacctagtggactatgcctatggatatgctccagtgccagtgtgaaacgcctacagcttgtttaatccggtgccctgaaagatttgccgcgtcagatgctgTTGGGCTCAAGattcgaggtggagagttgatggcacaataaacagcagagacacggctttcaaa
>Skav202476
CCGAAGCCGTTTGGGgcacttatttctaaccagatttggcacatccaaaaaacatgatatttgtataacgcgcctcaaaatcTGGCTCAAGctcttggaagacttttttcttcttaccgcaaccgaagaggatctatgtggaggaattg
>Skav205333
AGCTATGTTTGGCTatgtttagctatgtttagccatgtctagctatgttcagctatggttagctatggttaGTAGCTATCTTTTGCTgcttgtttggaccatcaacggaacggacacttcctgcagcgcaaggcacc
>Skav210770
TTTTGGCTCAgagATTTTGGCCTCCAGctgagaggagttcccggcagatatcatcgagaaattcgtctctaatttag
>Skav230412
TAGACATCTTGGTCAgatccaatcattaccccatgtttcatgtcaggtgcaaagaagtcggtggtccacgaccttcaggcaggacaacggctgctaaatatttgcatggtaacaggacgttttgcagctagctttccatttctttcgtcaggcaaaggctggaattgtggtggctgaaacatggtgaaacctttgccttctaaAGCAATTTCGGCTGAAGcactttggatctctggggtggtgggagtacgaaacctgcaggt
>Skav236124
CCGAGCAAGTTTTGGCcatggctaccaagcaagaacgaaaacgcgtccgaaaaaccattggcaagctatcaatgcaggtagttcagcctgcaacccgctcccgttatcagaaagcgtttcacgaattctgtcagtttcaCCATTTGTCTCAAacgtttcga
>Skav201482
CCATTTTAGCTCtatttcatttcagcggtcgctcacatgttttcgttgttagtgctgagcatgtaaaacgtctgccattatcaagccatcaccattggttgttgctcatgttgaaatgaacctttacctaattacactctcgtatgggtgtttcctcaaggcacaaggatgcgcccagttatcgtccagttgggcaaccatttaTAGCCATTTatgagatatgaaaaaaaaccccagccatagctttggggctcgtcaatggcttgagaaaccagcatcttgggcgcctccagaaatggtcacctccacagcatttgggaggcgaaatcaacgagaccaaccgc
>Skav220795
CCATGGTGGCTCAAcgcactgcAGCCATTGTGGCTCCAGattaacagctctcagccagttgctgggagttcaaaaggccagggacagggtgccaa
>Skav229008
ATTTTGGCTtgtttgcttttttggtgctttgctttgtgttgttttgataggttggctggctggGTAGTCAGTTCTTGGCTtgccctagtgttggtagtgtcttgttcttcttaattttttcctgttcattgcatagttcatttagaattccaggatgtattcgtcacaatctatttccagtcgcgcgaatcgcaagaagctgcactgaaagaattggagcggacagcttctaca
>Skav228493
CATCTTTAGCTCAAGttcacttagggctttgagtgcgcccgaaccgtttgatacattccatttgctgcctgctgttgggcagagatggctCCACTTTGGCTgccgatgtggtgctcctgcctggttctcctggttggagtcagcgctgatcgacctgaagggaaggatgtcacagaagaggtggacagtgctgggttcatccaacttgctcccgcagatgatgagatcgccaaacgaaacgatgccttcgacacattgtggaagaaatacttttcccactaccgtgaactgaagggaaccaaactgtcg
>Skav209220
CATTTTGGCgcctcgTTTGGCTCAAGatgggcgtttaggccgcggctgtgcccgtctagttttgccagtcactgctcaagaatcctgaggcatcctgaggctgcccagagttcagctgtgatcaaagccttctgtacttcatcggaattcctctttggactggttcggtgcttccgaggtatctggttgttctttcagtcaggatcgcttcacctctccaatggcgtgatctgtgagaaaactcacatggtttctcaaagtccaagtcattcttggactcctggaaacgcatgaacatgcatttgaaatgcattgaacaccacataaaactgactcaatcagccgaactaaacaaataaatcaagcaacttgaatacatggttgagtgaggacagcttgtagctctctagcagcatctctctgacacctcgacccaggtc
>Skav215983
CCATAGCCATTccTAGCCATTCTGGCTCAtctgagactgaatcacatggcaatccataa
>Skav205201
CCATTTTGGATCCCATTTTGGATCccatttgcctcatgttgcctcatgttgcctcatgttgcctcatgttgcctcatgttgcctcatcttgtctcatcgtgcctcatggcattcatgtaaacttgacaacttgatgcatataaaatatgcaacactcaaagaaatcgacgtgcgtgtgtttttccaaatgggacaaaccatgacaaacatttgcggaccatggagtttgttccgatttctacccattttcttcctggagtttggaaacttggcttcttggccgcggaccaaggaaggtgaagcggctggagaagaacagcctgagagctgaagctgaggccggagccagtgaggacaggtcctcgatgaggcaaaattcgcagcggtaggaggtgctccatgtagcgaagcagactgcagctgcgtggctcaattcttatcagtgacttgtcagtgagacatttcttggag
>Skav222006
CCATTTTGGggggctccctattttgagaaaccacccacttgtacattttcatccattgttaactacttatagtaatgaaccAGCCATTTTGGggggctccctattttgagaaaccacccatttgtactcagaaaaaagtcaggtaatcctcctggtctacaaatccgctggtggaaccggctcagcttctggcggtggaattgctcagcggccttaagaagtcctgtcaaacagccc
>Skav208232
tTGGCTCAAGatggctcaagtcactgtgcaaaagagtccagagctgaagtgctgactgtgagtgacactgttggttgtactggagaaagatcctgtacttttgcagttggttggttggttggttggttggttggttggttggttggttggttggccgcttgtttattttgacatatccaacacggaacggagattgaaaaagcagtcaacgggatgcaacatgcgggatgtcttttttgataaacactcgatatcaaacaaccgataggattagaatcactcaatgaacattgaatttgttggctagcagccactgacaccgataagaaacgcattcctcccatgtgtcgaacacaatcaacagcccacatgagggaatccactcaagagtaaactgaaattcgccgaagaaagctgtacctatgactgatggttgtttggttgttcatggtccctaagTTGGCTCAAG
>Skav205480
TAGCCAGTTGTGGCcttataccatgaacatgagcaaacatgctcgctttggacactgctggttgaagcctttcgtggtactttctcaaccttgggaggtttcggtcttcaatgcagcaattacaacaaccaaaggaatgcagtggctctgggcgtgccagctattggcgcagttgcgaggcttgcgaggcttggtacctgaaatgcggggatctgaaagctgcacctgctgtacctaatctgtacctaagctgtacctatgcacctgagtgtttctggtgtgagggttgctcagaactttggccttgcattgacacaggcaagaacatgtaaaacaccactgcatgaacattactttgccatactttctcttcattgaacgcattccttgggtggatccatttgagtccattgccttggctgcgTTGGCTCAAGttgcgctctagccttcaaaaggtcatggtcca
>Skav212411
CATTTTGGGACAActggtgatggaagggaaaatgtggatgggagcacgccatcttctgagagggccatgtcaattcaaatattggctacggacgtggtcaacgagctccaagtctccaaatggaaatatttccattgaaatttcaaagctgaaaacgagcaaagaccataccaagttctTTTTGTCTCAAcgtgacaagttgggaccctcaaatgtgtgctctatactggaaggtttgtggcaaagtattgtccatgaacacgctggtgctgtgccactagatgccaaaaaacaactgttcaacgatgctgacttc
>Skav216360
AGCGATCTTGGGCTGAAGaatcgtcaggcatgttgcagagggaccccaacaaaaacaggcccggacaccagatctcgatgctccaacGCCTGTTGGCCCAAGccattcagccgcgctccgcgtcgcc
>Skav230535
AGCAATTTAGAACTCAAGagagccgcggcaaCCGTTCCATTTGCCTCAccggctactcagt
>Skav216392
ATTTTGGCTgacttaccaaaaatactacatgtggaccccgcgatggaccgtctttgcaatgcttgcgaatcatactgcacactgcagaaatctgcacgccaaaagttcccttttcaatccttgggagcctcggaagtgcttcaaacatcatgagttgattgaagccgcgctccagccacccttctatcaattgccaaagtttccaccacggctctatttgtccaaggtggtcacagactggttaggtatcaagacaaagtgcaaagttggagTGGCTCAAGaccaaccagaactgaccagatgctttgaatgctggggcttgcctgttggcccacttcctggggaggattacttcgagacaatttctctgttgaagtcggtcttttctgccgaa
>Skav223205
CCCTTCGGGCTCAAGgtccaacaaCATTTTGGTCTCgcggccctcccaaattgcaagagcgagcc
>Skav210614
ATTTTGGCTgtttgcccccataacttgaggacagattctattcttttggcattattacctcgcatggtgtaaaaggtgtggaattcaatcatgttattaccccaattttggtttctctgtatgcttacctgcaagcgcaagcccacatgcgaattgcttttggcaaCCCTTTTGGCATCAcatttgtcaccaggtttccaacggccgctggtcacggccgaggtcacc
>Skav222695
AGCCATTTTacGCCATTATTGGCcattaccacaagcatcatcaaccactcttagccatcatcagctattgttaatcatgagcctctttctgcccaagtttcgggccttggttcctcccaggggtaggcgggcgcaacaaaagaccaagggtgattgctgttcactctggtgcc
>Skav221485
CCATTTATGCTCAgatccagaccaacccccatgcgatgtgattgggttttcaccaCCGCAGCCTATTATTGGGCTCCAAGcaatcgaccgttgcaacctttgggtggtgcgaatcaccatggccactcgggttgttgctaccgtcgcatccatcttcatcgctgcagctgcggtcgaagatcccagcgaatgccttgcagatgtgcag
>Skav212490
GTAGACAATTTTGGCaatcctcaagctccaacgttggcaAGCCATTTTGGCTCAAagatcatcaaccatcaact
>Skav221608
GTGGACATTTTTGGCTCAttgttcaaaattaattcagatcgggatatgtgtgtgtggttttttTTTTGGCTAAGgggggaggggcatttcgctgaaccttggccctgatcttttccttctttcagttccttctgttgtcttaataacgttggggctggacaaatggcttggtgatattattactattaattgcccggtgctccgcagcaacatgactactcaaatgttctctctatcagtttcacaatgaattctttacattcaattttccatgattggcttcagtcaaatccaagaaggcgagagaaacaagccttcgtcaaggatattcgctccctg
>Skav224972
tggctcaaGTAGCCTTTTCAGCGTCAAGagtcgtctagttgagtccttggagtgcttggggtTGGCTCAAG
>Skav202457
GTATCAATCTATGGCTCAcatcaagctcaccaggcaatgctgacgaccttccaggaaGTAGACATGTCTGGCCTCAtcaagatgcgaaaggatggggttgaatcggatggatcgtggagcaggtaacaggaagttgcggtagccagaactggattctgattgcaggacatcagagtcctatgcttgggaacggcctaaggggatcaatgccatgagttttattagaaatcagttctagggtgtgagatgactcagcggggcctgactctttgtggagcacgac
>Skav202696
TAGCCATTATTTTCTCAcccactggcccacattttttacgctggaagcgtgcaagttctgagcctcacagggttcgcttttgatcagtttctgtcgtagtagaactgccaacactgccagcagggctggcacagctacacaccagccatctgcatcactttgccggcttaccagctgactttggcagcatatagctacacagctaccaagatatgtgaaggtgggcaagcatgggtgaattggtagtcatggCGTTGTGATTGTGGCTAAGcatggtgaaaacacgggtgtaggttagagatctgtcgtgcttcataatgattagtcagcaatacgcccaaggcaggctggccctgacacagccactggctgcggcatcccaagagacaagatgggtatcctcgttcatgcctactggttggaagcatctccccgaagtcactgcgtgacgccaacgtcgcc
>Skav234157
TAGCCTTTATGTGGCTCAtgttgtcattagccagcaaggctcacttccttttgtgaaaatagctcattagccatgctgtggcttttccaaaacaacagggtttttctcatgcagttgcccaAGCCATGTTGTTGCCCAAGcacatggcacaatgtgtaaatagattgtggcaaatagtggctaattaagttgcaacccagaaaacatagcagcaaagtaataagcagcacaaagcactttgtttgagctcaaacttgttgtcctgtagccatggcagcagcc
>Skav206432
CGTGCCATCGGCTCAAGcagagTTCGGCTCAAGcactctgaccacaatgtgaagacagtcttcacatcagcgccaagacttggcagctttcagggccaca
>Skav208137
GTAGGCATTTTTTCTCgacgtgttttcccctttcctcatgtcaatctacacatcttgaagaactttgtATTTTTGCTCCAGgcttgtcgcaggacgcaaagacgtttttgcatatcccaatagattgccaggcaaacaagcactgcagcacttctctgtatatcagaattgctgagctcaagttgccgttggtggccgttttccggaaagaatcgaagatccagattatcatgattatcagtagattgcttatcagattttcagccaac
>Skav200096
TTTTGGCTAAAGattcctttcatgtgggcgcggatccttgagcCCATTTTGGtggccttctcaactgctgtggcatatcgcagccccaccagtgcggagtggatcttgtttggcctggtgtgctacgtggctggcattctcactggtgcttccatcactgctttgatttgcagccagaggttgcgacatttgttgggcgcactcttgctggacagtgctcggattcgtgagtggccagtccaagaagatcggttggctgggtatcgtcgtcaagcctaggctgccaactcagttgtcccgaccaccgtgcttgcagttgaagcctgagaagctagctcttacagctgcctcgcctccactcttcggcggggcccgcccgcgcagcct
>Skav219013
CATTTTGCTCAtgacccatatcatgtagccacatctCCGCAGCCATTTataaacccaggggggccttaccgaaaagcccgcccccgtggcgctggaaatcgctggccagccatgttcacgcca
>Skav217508
ccatcgacagttttggcTAGCCATATTGGaactttattgttggaaactatatgcttattttgccttttcacaccacagcttcgagatatttctagggtcgcatgtgtttccatagggcgaatatgtatgaatgaagctgtacatacttacaacacaaagattcctttaggtacggggctgtccataaggaatgtcgaaagcgaccaagctccctctctccgcaggagcaatttggggtacctaatcatgctggtacggcttcctagcatgacccttgatcctcaggagataCCATCGACAGTTTTGGCT
>Skav235202
GCCATTTTGataagatgataaggtcatatattcgtgaacttttccctgggagaacTTTTGGCTTCAAGttgttggcaactgatgcaggctctgttgggctttgttgggttgtcaccccaactactgcaaaaaaaaagtgcatttgtttttctaacttttcaccccaacttattacaacaaaaaaccgccaatgaaggttggagcgcatgggaaccaaacagcccaagcctggagccgcttcaggatgtc
>Skav208219
TTGGCTCAAagttccaccccctcccagctccttgagccctcaaactcagtgctctcgagttcaaGTTGCTATTTGACTCAAaaagtcacatctaaaaagtaatccatgtctgcccatgtcttctttttttatttgctttcctgtttcaagtcatgttcacattgagtcatgtggtcagcttggcagtgcaggttgtgtccaaatttccgacgcgtaaaatgctcggccaaggaagatccccgggcaactcgaag
>Skav212166
CATTTTGGCgatggctgacgaagcaaaggtcgaggagaaggacaacttcgatgtgggtccgctgccatggcctcagggacaggcaccaggacatggagcacgtaggcgccacataggcgacgccacataggcgacgggagatgacaggagatgacgggagcacatcatttgcattttccaaagcctcttgagctcagttccatgcagttccgttctcaaatgttctcaacgtttgcatctgactcTAGCCATTTGCTCTCAcagcctggtggccttaggtaggcaatgttttcacggttcagatgtttttaacctttttttagctaagtgggttagttcgtactaagccgcagactcaggctagcagtttctgccacaagttgcgacagcaaagtgtagcctgcgcc
>Skav216283
AGCCATTTTGTCTCAgcttcaatacacgtggtaattctctcgacaaccagctcttcctcttgtcgccacgcagccatgatcaccatcgcatcgctctcaggggaaatcctcctccgcgtccacgaagataatgaagatgatggtaggtatcctgctgtcagcgacctcattggccacatttCGTCAGGCACTTTTGGCattaggccagctcctcagcaactatccatcattaggaatgatgatactcgccagctggagccccatgaactggtccctggtggcacaacagtcacctacatcatcacggattttcatccccatgacgtcctggacgctgatcgtcttattgccgcctcctcacgtggactcttaatcatcgtggcccag
>Skav201787
CATGTTGGCGCAAGcTGGCTCAAGcttcttgcaacctggcacaagtgcacttggagctttcttgctgtc
>Skav202785
GTAGAATTTTGGTCCAAtgtaaaatcatcttcggatgtgttcctccatgactttcttttcaggcatcggatcaatggggcgcccagctcggaggtacagacctcagattggaaggttttggagcgaaggagaaagcgagaaaacgaggcaaaaggccatgattcatggcaggaaaggatgaggaacaaggaacttcaaaggcaggttcggttcttcgatttttttgtagtctgaacgacaggttaggttctatttgagtctggaactgacgttttgtgaccgactccaagagtggtgcAGGCGTTTTGGCTCcgaacaccgaccttcctgaccaggtgacattgtgccc
>Skav228420
CGTAGCCCATGATGGCACAAcacctttgctacAGACACTTTGGATCAAGaagcctcactttgtagaacctcatcttgttcttgaactcgac
>Skav215819
attttggcTAGCCGTTTTGGCTCCAGttttgccccccaccaccacgacctcaacctggaccttgccgcatttttcgccatggtcgagcagcagaggcaggtccagctacaggcaaagatcgatacccacgcgcagttggcggcccagaagctgcaaatgctgcagcctgaagccgtgagtgacgtgagtgaaccccaATTTTGGCT
>Skav210784
CCATTTTGGaggtggaattctaagctacaaacacatgttccggaacagatgtatttttttccaataaagatgatgagtcttgagtcttgaaccaactctggcaaagctgcagagacactcctttgcggctgatttccacaagttttgaagatggagacgttcaatgattcaagtcttgtcttcccaaggattggttattttggagcagtggatgtgactgcgcctttcgcagcaagaagattagtttacttagccagtgaaaggatggcagctggtcctgctaaactttggaagttcttcctcctgaccttaaagccattTTGGCTCAAGgcattggctcaagtgcatctagccacctcaatctcctctcagtgcatcatcgctggcttcgcAGCCATTTTGGCTCAAG
>Skav232524
CCATTTTGGtgtaagcgcctctgtgtagcaaatcaccacttcttgcttcatttgcaactgcgacaaaaaaactgatttttgctgggtttcagtgccctttttgaacctttttgagaccattttgagccacatttaggtcatcctttccatcatcaaccccccttttttatgaccctttcatcatttcccagtgcttccctgtcacaacgcgacttgccaccttgtcaggagctgatgctttcatcatcgttggggacactcagacattgggattgctgggcgtcggtcatcaatgatgctgttggagaaatcttgattgtgacacttgatgtattccttgggtattggattgaaccttttcatttcaaAGCCGTTTTTGGCACAAattcgttttccctctctcttcattgcgtctcacctcactccctttgctgttgatagcaatgcctgagattgccacccagaccgattgcgttgag
>Skav218165
TGGCTCAAGcattaccgcatggacacccctgcctactttgcatgaacatacttttgcatgaaaagctttgacattgaacagggttcagaagatttcagatgccaatcttgctgatggtaactatgtgggtacctttgaaatcccgctcttgtcatatttgacacactcttgacGCCACTTTGGCagcactttcacaccaaagagcccagttcc
>Skav209669
GTAGTCTTCTTGGCTCcgttgccctttCCACTTTGGCTGCAAaggtatgcgcacagaacaagcagtggaaagaaggaaacagacgtgtaggatcatgtcgggggaac
>Skav203605
ATGTCGGCTCAAGCATTTTGGCTCAAaccccccagcagccaccagcagctccctctgatctacgcg
>Skav230579
CCGTGGCAATTTGGCTCccttgcagtcagagtcgtgagcgcaattgtttaaactaatgtcaggagatgatgcaaaagacgcgtgtgcaatatgtttatcttggaaaatggaaatgtgtttggcgggcgcttgagttgaattgattctacatgatttaatgcatttacTTTGGCTCAAtgatttgttttggttgtttcgtagaactcgaccactttgatttctggatcgggcaaaaggcggcttgctgattttccgatcttagcttcaaactgagattaagtttcagttttgttttgttgtgtatttttctttttcgtgtgaatcatgtacgaatcatttgttgtttcccatcttgcctaattgcagattagtggatagattagcgca
>Skav230895
TAGCATTTTGGCTttcaggcctcctccaaccccttgccgccactgctgggggacaccggtgtctgggtgctcatgtttgtgggctagggccttggggggtgcacccatgtggcctgcatcattgcaaacctcaccggtgcttttggaaggcaaacttgcaattgcataaggacagtggttcatggtcctttgtgcggttgcatcttatcttctggaagcctcttcttgcaacaggagcacactcgtgcttttgtcttgaacaaatcgccttcagagcgcagcgctgataaaaatggttgatgtgttgacctgagcactaaaaatatcggcCCGTAGCCATTTTGGCTTAAGcgcaggttgcacggcgccaattcagtagcatacaaagatttgcc
>Skav215005
AGGCATTTTGGagtattagggataccaatgaattgaataaccattacaataatatacgaattttcatacaaacaaatatggggaaccaattgctattggaaagcaagtgtttttaatttagacttgatattatccattacttggttctttaatatcaaaatactacaatattagacgcaatgggtcctatcacttaagctgccaacgatgcTTGGCTCAAGtttcgtggttggtgtccccgc
>Skav212828
TAGCCATTTatcatcgctagtaaacattcatccttgctactatagccatcatctttacgatcatttttcattcactttttgttactagccagccccctggtagccatgggagaccaacattagccactatgaatTAGCCATTATTGaaccagtgttacttgccaccattggttgccactaaaacccttaaccatgctactagtgactagttacatgtcactagccattagttgccaccacgacttgccttaccagtgactccttacatgtcactagccattgccagccatggatcatggcctctgtcgccggcatcatgac
>Skav231387
GCCAATTTGGCTtacaaggttgacaccgcttgtagctagtcacatccaagtatcatttcccttggacggggtaaacatctcccatttctggggatcgtgttccacttgctttaactctccaagtatttcgaaacaaaccataaatgtccgatgatccaccatgatcaacaactGCCATTATTCGCTCTAGatcaaccctcattaatcctgattaaccctcatcaaccctcatttaccctcatcaaccctcatcaaccctcatcaatcatcacttaccatagcttcttctatcttcttctcattcttaaccatccaaatccttcattttcagcataggctaaccaccatcctcggctcccgcggtgcc
>Skav211019
GTAGTCATTTTTGGTCttggtgttgcttgcgtttactttggcggttatgtgttgatactgtcctgCATTATGGCTCggcaagcctggttaccaacctgaagagtagaatggcatggggccttgttcctggcccactctgaagtgcttgacttcaatttcgttttctgtcgtccgtccttttttgaagcggcataagtcgttgttttctttttggctgtaatatggataccagcatatatctatgcatgcacatacgctgcaggtcaataagcacaagtgctgtcatatatgcatatacatgtcctatgcattgatatatatatatatagagatatatgtatatagatacatatatatttagatatatatatatataaatacatgtatatacttttcatacatgtatgttgaaatacatgtgttgaagtcaacatcaccattcctcggcagccgataggtgtggtaag
>Skav226949
TTTGCCTCAAGcctcttcagaacatgtccattgggcggatgttagcgcaagtctctcagtgtTAGCAACTCTTGGCCCAAGcaggagcaagcgagcagagtgactcgaccccgactgcaaccaagagagaccaagagtttggccagaacatggatgaacacatggatgaacctgataatttgatgatacgaagcagcacttcaatttggacactgctacacgttgcaatttcgttgtcaaggaagagatgtgaagtttgtcttggagtctcttggcaactcttcaacgaactcttcctgactgttttcttagttcaactcggactgtttccgatccaaaaccaccagaggttggcc
>Skav229954
TAGCCATTTGGGCatagaaattatgaccgctgaagggacagcagggcctccaaatggccatgcaactggaaagggctggtcgcgtgctcccccatgcctgcgactgggcaatcgctgaagctcaggcagttcgctgatggaccaaatctctttggaagtgcctcgcagcaatgcttgtgaattccggatttgtgcatgactgaagttcttgagcagtaccttaacatcgtaaacataccaaattctaaaagatcataaattctTAGACATTTTGaattcttcaacccaacatcttgaattcttcaacccaaccggtgccactagttggcatcaacagcgcatcgcaacaacgggtgggccgcccctgaggctatggtgccctccaggccttcagcaaaggagtgtggcttccgctgcccaagaggaag
>Skav217801
CATTTGGGCTCAttgatgcaaagggtttcttgatgcaatgtgtctcttctagccaggtatcaagttctttgctacgtagtagtgttgcttctccacccatcaaaaaatgGTACCAATTGGGCTCctccaactgcagtaactgccccaccaacaataaatcttgccaaaaaatcaggtactgcaggagcttcacttcctatcagttggtcataacttgtcagttcaaccagttcggccgaactcgccggtgcc
>Skav210099
CATTTTGGTTCAtgcccagatttgactttccgatcccttgggcactCCATTTTGGagacctgggctgttcccccacccgtcatcaccagagactacgggcacatgatggttttacaactccaatccatcatcggagattcatcggaaagaatcacctatgtggcaaagccgtgacaaaaactgaggtgagtgtactggcaaatgtatctccatgtatctcccaaacatttttcttcacctgctagctccacggaatccatggccgtggggttcctttgctgatggctttgctgccgatccacctgccc
>Skav229709
CATTCTTGGCTTCAActgcatgccgtgactgcttttccgatgacaattgtcagtgatcttctcattgaactagcgactgtcagactgtgcctttgtttgcctttgtgtttatagtctatatcactcaagtgtgcaaacttgcctggacacgcttcttgctgtaggaatgtgcttggcatgtgacttcaaagattatatcattcatgatgcatgcatgcttatcaatcccattgttctacagtagagtatacacatacttgcagtgcatcatttgctctgatgttgtttccaaagtcttggtcccgaagatcgagtcgagaagtgcagacatgattctcagtggtatccatcacacacacacatgcaatgtgtgaatcaatgaaaggactgagtgctgctgctgtgactaagTGGCTCAAGcaggcgactgacgtttgcatttgagctacttaagcttacagggcacc
>Skav228623
TTTGGCCCAAGttggtaagctcaaagattgcaatggcagcactggacattcaagcagtagatttccctgcaatgctgtcgaaaggtgtcggtctccgactttgggttgtgaattggagttaaggtactcagcatattcttcattatttctcccacgatgattgacctttcctatgttctttgagaaagggctcaactccatattgaatctacaggatggccaagaggatcagacaattccatacccactgcttgcagaagtagctgctacaggttgacacaaagttaacttgaacattactctaacaagcacctcagGCCATTTTGcgatttccgaatcaacggtgcagccctgcagagatcacaacagattgaagcaaccgctgtagagaacgagcctcgagctgtcgttgagtcacatt
>Skav209653
TAGCTATTTTCGCaataaaattgcatgaccttgtccatcatatggagccagctggtcggaggtttttcattttcagaaggttgagacatattgagatctttgCATTTTGCCTCAtgcggctgtatccgcaacttgatgatgtcctcgaCCTTAGCCGTTTTGGCTCAAcctagcctggagagtaaaagagcttttgcattttcagccacagagcc
>Skav233947
TTTGGCTCAtgtgcaccagcttcttgcttgtagagcactgtttgaaccaaaacggagtcttccaaaaggttagggcaaggcgattacacttgagctgcacccaaaattcttgccaacacgaaaagggttgagcaactcctcgcaattccatctgctttcacatgagttcttccattcagagaggatcgctcgcccttagggtctcttgagtagtgtgattgccaagacttttttgtgtcagtcaaaatgcagtgttcatggatgaagaggtcatgtaatccttacgctttgatcctgggactctgcttggGCCAATTTGGATCcgtccaacggctggccatgtgggggcaactgtcgcggtagcc
>Skav208199
CCGTGGCCCCTTAGCTCAAGtgttgaaagatgttggtacacaattcaaactccacacttgaatctacttgaaactttcatttttcaatttttgtctatttttcggagcatatggatgaaatttggaactgttgaagcatatggaaggcatcatcgtagcgcgtttcctcttgcggagttgaatcccaaaagcagccatgggtcatgtttatcatTTTTGGTTCAAGcttcaagcttcgtggtgctccactgagtcgacgtttggcgc
>Skav218402
CCATAGTCATTTTtaaatcccagggtccacattgCATTTTGGCagtgtcatgaggctttcgcggtATTTTGGTTCAAagtttgatgcgcaacgctgctgttggtgcgccagaaagggctgagggccgagaaga
>Skav217858
CCATTTTGGggagttccctgttcaagaaaaaacacatgtatatatgatgtaaattgatcatatgttctcagGTCGGCATTTTCCCTCActagatttcatggtttggcagttgtcgattcacaggtgTTTGGACTCAAGcctcaggctaaatcaagcaagttatgcccgcggcctcggcgaagcaaggagaattccaaatgcggacagccaaactccgcaagctgattttgagtttgagttgttgcggctgcgtctaccttagttacagctgcagcggcaagtttatatgcttcaacatgaattcctcttccaCATTCTGTGGCTCAAcgatgaggatgacgccttccagacctaagagccattccaacatgggaagctccaatgcctcgtttcttccctccatcgaagtgctggaggatctgggaatctacgcttggaagccgcccaggggaccagagaaaggt
>Skav230037
ATTTTGGCACAtattttctagaaagtagtcgccgaaagtcaggggcagagcaaaagtacttgcacaatgaacttgggcatacgatgggcaagggctcacatgcgcattgacaggagtatcgagacgttatttgatatggctaggtatgggccaaaacccaaccagcaactaccagaacagttggatgtgttaacattggccatcggtacactcaaacccgagctgtttttccttcgagcttatgttctgacgatgcagagattcctcaacatgcataccgtgccgagtttcagcacccaaacctcgcacaattcttgccagggaaaagctttgGCAATTTTTGCTAAAaagaagtaattttgccacaaaatgattctaaaatggaaacatgctgccccgttccaggcagctttggcccatggtttgaattggtttggccaggtttgtttgttgcccagcgttgtaattggcgctttgctttttattggg
>Skav204989
CCAGTTTGGCTCCAGccTTTGGCTCAAGtgattctttggttgagattcagcagattctgccggatggctttgttttccccggccgcaagccaccaatttcgcggccatgagccaagaaactgaga
>Skav203839
AGCCTTTCTTGGCTtttagagcttttgtagcccgatgtgggttaatttctgagcatggattgtgtgactacatgagaatattagactagagtcatgtacagtcgccattattactaccaaccatgatttgccaaattagttttccattctattctacatctaaaagccattgttataaaatcaatattgtaccattgaccattactgacacatattttcagccaccgtCGAAGACGTTTGTGGCTCtcatgggccttgcaacatcacgttgcaggtgggttggccagagggcaggag
>Skav215654
CCATTTGTGCTCAcgtcatatgtctcgtcaaattctgtaactgccgccgtttcaaaAGCCATTTTGGtttgaaacccttgactgtcttcagaagttgacaccagcttgcgatttgtttggcatggcgaatcctttgcctctagccctggagctttggaagagcaccagctgctaggctaaacctatggatcagttacaaccctttaaacataaaaggaacccttcgatctaggttgaactgcaagtagctcttggatctatagccctactataccccaatacatgttatccagccatttgcccacaccgcctcaggaccggggaaggttccgtggaacgtgcaggatgtgagggct
>Skav212572
TATCCATGTTGGATCAtgttggtgtgggATTTTGGCCTCAccggctgggggcacaccgcacgcctgcatgtaacgttagcacatgtgctcgggaaaaatcaaaacatgtgccgtatattttagattggtatgatggggcgtgacaacgctgtatccaagttccctcctgcaaccttttggctaacagtgccagaagctcaacaatgagctgcaacacacgttgtCCGAAGCCAATCTTGGCcgctgacc
>Skav219503
CCGTCTCACATATTGGCTttccaggacacagtcacgcatgaagaccctcagttcaggcgttcaagttctcacaatcatattagacgggatggacaagggtaaatacaaataccctcgttctctgaacatggcttcgaaagagttccagcggctgaaccggccgtcgttgaacgctcatgGCCTTTTGGCCCAcgggcacgttgcagcattgattctttcagatcaatttgtggcaaaggattcttcatggtgttgtgaccttctggcgtgggccttgaacatcattggggagtacacagatttacgttctgtatccctagtggtgcagagcgataatacgacacgtgaatgcaaaaacggcaccatttgccgtttcctggctaca
>Skav235879
TTTTGGCCAAGacacactccaaagacagccgagtgtgttcagccagatttctcaaactaccAGCCTTTTTGTGCTtgggcccccactgctcgacatatcctctgtcgtgcttgcttgaagcgtcttcaagaggaacct
>Skav209649
ATTTTGCCTCAcgtggctgtatccacaacttgatgatgctcctcgactGTAGCCGTTTTGGCTCAAcctatcttgagagtctggagagtaaacgagcttttgcattttccgccggagagcc
>Skav202726
CGCAGCAATCTTGGCaagtggagatgtcgtcacttggggccatccacggtggggcggcgacagctccgcgattcaacatcagctgaaggacatacagcaagtccaggctacactcggtgccttcgcgGCCATTTTGACCAAtggacgagttgtaacttggggaaacggagaatatggcagtgatagctctgcagttaaagatcaactcacaaatgtcaagcatgtccagggtgcaggcagggcatttgctgccactctggccaatggatgtattgtaacatggggtgatccagcatttggtggtgacaactctgtgctacaggatcagctcagaaatgtgcagcaagtacaggcaacacgaaatggtgcattcgctGCCATTTTGGCcagcggagatgtc
>Skav225502
CGTAGCCATTGTGaccagcatgatgcttgcatacagagatgagacatactgaattacagcgcacttacatgcactttgaacccgtgcattttcttggagaacagctatgtacccttcaccattacagtcgctacgcagagtcaaaggcattgggtcgggcacctgaagcataattcaagttcaggtccaagggcatagggtcatttttgcgcgattcaacaaccgtgtatagcatagataatttcacacaattgaacacacacacaaagatacatgcacacatgtacatatatgtaatgttgtacttatatactcatacacttatctattttagttttatcacatccagacttttctcatgtatgtctttGTAGGCTTTTGCTGAAGgacccgcttgcagcctttccaagATCTTGGCTCAActgcatcgcagccctggcccctcttttcgtc
>Skav225801
TTTGGCTCAAGtgagaaaaggtcctctgtgattgttgtccgttgttggctgtataaacctggaaaataatccggaatgttgcagtgttcattaccaaaaaccatgcgtttggagtgtgaagcgtcggccggaagacaggctttgtgcaaaaatgtgcttgtgtgttctttttttaaatggggagccctgtttttggagcatCCACTTTCTGGATCAAGaccttcagccaaactcacggttggttgcgtcaagattgttggtttgataccatcgttgattggtgaaatcacgaaaatctggtccccgttgtcgcttggccgcacggct
>Skav228331
AGCCATATTGGattatattttctctttttcacaagactaacacagcttactgcttctatgatgatttctcaaaataggggtacccctcaatcatctaatattcaccatttctattcataaaccatccattttttgggggtcccctatttttttgagaaacccccataccagccatatggcagtggatcaaaaccctgtatgtacccctgcttcccctatcattaaccattgtttcccctattattgttggtcatcatcccccattattggttggttagacCCATAGCCATGTTcctcttgctgttgactctatccccatgctggcagccttcttgaccaggccatccgagccgcaggcgcgccatgg
>Skav229047
CCGTAGCTTTTTTGGgaccgggggtatggttgattgaccacagcatattttttCCGTAGCCATTCTGGCTCGAGccatgttagcgttttgagtcccgaaccgtttcatacaatccatttggcattcattgctgcttgctggcagag
>Skav211714
GTAGCCATCCTGGagtggatgctgcatatcaattattgaaccattcccaaggccacgaaatgacttgtgcatatccaaatggatgttcttgcatggtaatcaaaatgaactggtctactctcacagcattctggacaccaagagcctcgggtgtcacaagccgcacatgtaatattgtccacctgtcatgggtactgctgttacaagaactgtgctttcaaaatttgggggtgctaagttgattgccggtttttgattgcaggattaataacgcttgtaagatgggtttagagacgaacaagtgggcagttctggcacagaaggggtctagtgaatgacagaagcagtgggtccatggccgtttgtttggtctccttccgatagcctcccagaaccatgatCCTTTTCGGCTCAAGattctgagaaaacatatctcagattcatatacgatactgaactcaatccagccgcgaacctcccagtggctgagcagatcc
>Skav224573
CCAATTTGGCACAgttgcatggagtttccgagtgtggggacagtgtaattgtccatcgtcacgtggaatgactccttcggaaaattgggaactttgcactcctgaaaagcatcccttaagacaatcacaagaccatggaaaatgtgatcgactgctgatttgcagttctgTTTTGGCTCAAGccatttcgagaatctcacagagctttgttcctttaccaccctgctgcccagagctacagaggcag
>Skav204411
GTAGCCACATTTTGGTCAAataaattagattgattgaatatttacattagacttataccataacatgatattttcatGTAGCCATATTTGGtcccatgtactatatatgaaccatcaatcatagccatgtcactgacccagtttcatagccatagttatatgaacctggtcccataactaacccatcattgaaggatgctcagctacctccactaccggcctcgagcgccaggcttttgctgcttgggcattctgatcgcttgcgacgatgagatttgatcctcgcggacggcggcgtc
>Skav207388
CCGAATGCCATTTTGaaaggagattgcctggtgatccccagctacggaaaacttcaactgcaaaagctgctcaggatggcttggataatcttgggctcccaagttctttcgcgcatagctccagccacgccattccacgccattccacgccattccacgccattccacgccagtctccaaaaaacgtgacgttccgtggttgcactccaccggggaaaaactgctgattagacacctgggactgcAGCCGATTTGTGGCTCAAcgggtcgactgtcccatcaacgaagttgtcgca
>Skav215775
TTTTGGCTCtttcgTTTGGCTCAgatgacctggattgcgaggtgccaacacaagggttggggtctgcgacttttgggttgcagtttgcgctgaaagaccaaactcagtggaaacaggtgccagggagggtcctgggcacagagttttgtactgatgctgcgtgtgtggcaaccagcacttgagtcctgcactggctcaatttcaagaacaaccacgctttgtgaggctaccggccacatctcatcatgcacaaatgcagcatgcatgtcccgacccatggcacatggcacgacagggttctagaacgaggcaaacaagcaaaaaaatacaatcttgattcacaaatcctttgttcctttttttcagccgatcattcagtgcctccaatttgtgca
>Skav218029
CCGCATCCGTGTTGGCTCAAGcatttgCCGAAGCCTTTTGGATCAcatcgcccagtcgtagccgtcgaaaatc
>Skav209992
GTAGCCATTGTGCCAAGctttgctttgactatgagagcaccactgtctatgaggtgaagctcgcccttactgatttgactgagctgatgatggagcagttTAGCCTTTATGGTGCAAGgggcagacgtcca
>Skav216365
TAGCCATTTTtaaccatcagattaaccatcgacctgttcaagttgagtccttgacgttacttcgtagcgtgcagcgacaggcgtaccatttctacttgtccttaccagcagggctttggcctcagcatcgcaggtgctctccaactctttgctgtcgtatgtggagaatgtgtgtttgtatgtatatgtatttgtgtgtaaattgcatttatatcaatatgtatagtatttatatatttttttatatatatagtaatgtgcgtgtgtatattgcaaatatagtattcgacattatgtatttggtcaatctatcatgtagatttgaggcaaatgtattgaaatcgttctttgaaaaatggctacggtacaacttgcggagggaattcttggtgactcacatgtattgatcatgtcctaccgccaaacctcactgtgCCGTGCGTCAGTTTTTGCTCAgcaactcagcgactgacgatagcagcattggagtgcca
>Skav216324
CCTTTGCCGATTTGGCTGAAacatgcgcatgtttcacaacgaaggcatggtcggtgTGGCTCAAGggtcggggtggacacgcc
>Skav221554
GCCATTTTGaggtagagaatttcgctatggacatatttgaggtcggagctgaacgatgtttcttaggagcttcagcaggtcaagcctcagagaggccatggtttggaacaagggttaccaatggttaccagatgttaacacttatcctgagatcctttggtttggctctggctgtttcgtcctaagcaccatatttagagtaaacatcaagaccaccgacgCAGTTTGGCTGAAGacctccattgttaaacaatggccagcacggaggaggggcagggcgggcagggccagcgtcgctggtcagctgggctccgcaacacatggcagagg
>Skav206749
AGGCATGTTTGCTCAtaggtggctgaccagaggccacgataaaatcagcattttccgccaggcgggggtgcaaacttccagtcactcctcttcttgtagcctggctgcggcgggggcagaccacctgttgcgatacccaaatgctgccgacccaggctgttccatgcatccagattcatccagatcaccaagaaaagatcataaaagagtcctttaattttttgctggactcacacaggcgtgtagcgaagcaaggattcaacgggagatatgtcagcagtgaaaatctaacctcaaaaaacttgcgcaatcactttgagcctagcagaccaattcacatggatcaattcgtgtcacttcaaagttgagagctggaatttgatgAGACATTTCGGCTCActaatctcggaggcagcatccccaaagccaag
>Skav218530
CATTTTGGCatgtacgcaagaaatgtCCATAGCCATTTTGGCTgcagtgaagtccacacaccatgaatcatgagcagggtcctgaactacgtgcagggccaaaaagatctgaatttgcttgggatcgtgacggaaaacagcacatgtatagcacaaaagtggaaattcgaccatgaaacaagtggcgaaacactcagcagatctcagcagcacttcatgaggcaagattgatcagtgaagcagcgcagtgaagcagcgccatcgtttcgcc
>Skav214554
CCATTGTGGGACAAGtgcgggttaggtaaaggttgaagttgaagctgatgttcagcgttgattgattttggatcttggtaaatttagaatttctggtcggctttttttagatcaaaatattttgatcattgtATTTTGGATCAAagttggatattttcaattcgatactttttgactttttagtcccatttgagttcgtattttttggtggggggtagaagaatgaagacaaactcctgcgacttgagaccgggcaatgagaatgttgcagaagggaacctcaccgtggcagctcgggagttgttgaagttgtttagagttggtccaatccagggcaaagTTGGCTCAAactcaagctttcagctctaactggtaaccccagccaagttacttataaaacaactcaaacgccagcggaatctgttggaagttgcgacgcc
>Skav213317
CCATTTTGGtgatgttttaagttgacgtagtctggctacggtctttcaactgcacgtgttcgacacgccaaggtgagttgagggaggccagggaggccttggaattccaaaagcaggaggcggcagctgcagctcctgccacagaggagcgctggcgaaagcgctttgtggaagcaagtgctgggagcgcggtggaggccgggcgatggtgggcgacgttcaggccatagccgccacagctactcttgagattgggagcacttcatcatttgaactttcattccgttcgccttgcatgctgctaaggatcagcaagcagtccacaatttgcagctatgtaaatcaatcatcaaggattgtgtagtttcacccatgtTTTGGGCTCAAGttttgaccagctccagaagttcgaaca
>Skav200311
GTTGACATTTTGGgggtaagggccaatgatgtaaccccaaaggatagtggacttttgcagttttcggcgtgctccatggatttctatcttgaggcgcggtttgctggtggacttgactctttgggttttccttggtccgttgcgtcctccttcaacttccaagttggacttctcctgatgtgctgtctggccgtttgcgttcgctcttcaacaaaaggaagggttttctgtcttcgatgctcatccagacgcgtgactcccgccagttggATTTTGGCTCAtctcctcatcctggctccgctgggttgggctctgtgtgcttcttggactttgatcgaattcacctttctgtgtggttcccttactgtgatttgtctctgggctttgctgcgtgctgctccgggggtccataaggggaaccaaaaacgtaaaggggttgttttcccaagagtccactcAGCCATTTGGGttatgagtctcacttcg
>Skav236767
CCTTTTTGGCTttggTTGGCTCAAGgctatgctttctgattctgaagtgtgttcgggtgaaagagcgaagaaagatcacattcgatttcactttgacagtattgcttgcactctttggccttgtggacttgctgatccgaacagttagtgaagatcagaccatgtcaggacttctctccttggtagatcaagtcatttcagtagatgatccaaccagcagagagactgtggagatggtgatcaacggctcatttaagaccttgactttgatctcagggactgtggcacagcaggagctc
>Skav226934
TTTCGGCTCAAcacctgccagctgtgggatgatgatagtgagattatcaatgatgacataggTTTCGGCTCAAcacctgccagctgtggtgagcctgcttctaccgacggttgagacctcgttgcc
>Skav208524
CCATTTTGGaattggtgatgacgccggcggcgtcggtgacgatgatggtgtcgatgtagatgatgggccttggtggcccacgcctattgttcgcaggactacttgtaatgaactcagggcatggctcatcaaaccgcgcacgactgttccgtgtttggttgatttccgttgctttcgggatctttacgacaactcagtacatgatgtcgcagcaaaggtttctgctgtacctctttctggccaccgctgcaacatcaatggggagccacCCGTGTTGGCTCAgcaggatttgccctcaggtcttgccacg
>Skav229425
CGTAGCCATTTTGtgagccgagTGGCTCAAGccttttcaatcttttcaagcatttttggagcgctgttgcctccc
>Skav211106
CCATTTTGGaagagatggtcagcgatctcctctcagagatgcccaatactcccatggacttcatgatccaatggctcaacaaacgagcaggaaaagctgcagccttcagtgagcacgtgtcggtgtctcagaagaatgcgatgctgaagcaagagctaaggtccttgcagggatctttgcatgaggccagcacggcagctgtttccgtggagaatgtggaggatgaggaggaagaggaagacgatgaagatgatgagccacctcccggTTGGCTCAAGtctgaagagagccagcagaagacccgcacctccgtcagtgctgaagcatatggagaatggaatgccaagaaggccttcacaccacccgactatcccaagagcgatgatcaaaagcagcgcctgaaggagaccttgaacaagagcttc
>Skav230483
TAGTCCATTTTGctgcgtgtgcttcaaattggttgcaagttcaaaggtggacctgcacatttgttcagaatgcacttccttgtgcaaccagcatatggaaatccgcatccattacccacatgcatgggacagCCGTGCTCATTTTCCCTCggagtcccgattgcaaactgtcgaagaacatagccctgaatttaaa
>Skav202143
GTAGCCATCCTGGaaaaagccaaggaggagggggatcatccagcgagggagattccaatgggaggatcctgtagctgcctaagtcggttggtatgtatggtttggtccacAGCCAATTTTGGGTCtcagtagtggatgctggacactcatactgctatatcaacctcttggactccttcaggagcgaagcgcaaaaaaacgtgtccatactatcagagtgtagaatctgaccagtccggttccagacttgaccaagtgccccaactgctgatgctaagctgctaagcttagccat
>Skav214621
ATTTTGGCTgagatcgcttggactttaggtgcagttggctcggccaattggccgtgctctgagggggttccagtagagctggaagcaaatagaagcttcaaagtgcagtggacctagtaggcataggattctccatgattgatttgtttttgcacttcaaaactCCGCAGCCATTTTGGtttggaggagcaagccacgtgaaaagggctccagccttcagctgtgacaccaaatactggcggcacagccttgcagcctttcctcagactgttcag
>Skav212203
ATTTTGGACCAAGggatcaaagccacaattgtacaggcgcagtgccaaggttcatcaaggagaaattggacgcggagccggacagggaagtggtcaaaggcggggattcaaccagggtttgccattgcccagacacggcatttgggacgtgttcaaaggactcaaatttgtcatgaaagtggatgaaagtggatgaaagtggatgaaagcggatgaaagtggatgaaagtggatgaaagtggcaaagtcatagcaggggtcacgtcctcgtgaaatctccaggctgccgtgatggcaaactcttcgtatctctgggtggcctgaactTTTTGGCTCAggtttgggggtagccatgctcccagactgactgtgttcaatcgatttgttgactcaaactccacgagttcaactctgagcc
>Skav226099
TAGCCCTATTGTTGGCTCAtccccctctatcagtaccctGTAGCCCTTGTGGtgtcgaagatggtgcccaggtgggggcacctgatgccaaagtgatgagaattgggagatctaagaatgttgaaattgttggaaccatcaaaagctgtgaagtacctgaaacatagatgaaacttaaaaaaatgtagtgaaacatgtgtggtttcgaaatgttttctgcaatatgaatgacgccatcattatcatatgtagtctgtttcatgaaaatgaagcgaatgaagacagcggtggcataacgacgaaaaggcaacaagctgagacacgtggccttaacatcttagagctgcagaaagcccatagcacagagattccaagcctggtacggaaaagcgctgggaaagcgctgtgtacaaaaactcc
>Skav230373
AGCAATTTTTGATCAAacattagaacctacttgattccctaccccaaccttgttgtccatacatgttctatctggggtctatgccggtgtaatttctcctggacagacaacccccagttgagagcatggcatttgacattttcatcgaaatcattgacAGCAATTTTTGATCAAacattagaacctacttgattccctaccccaaccttgttgtccatacatgttctatctggggtctatgccggtgtaatttctcctggacagacaacccccagaaacgacccagggatcaggggctctatgcaacattgtcgataggtcagttgggtgtggtgtggtgtaaacgtggaccgtgatagaccaataaaagcactttatatagttaactttagtccagaaactctgctactttgctcgatccaatctctgcagccgcgggttccgcggcggggtacggtgaagttcgtttcctcgtgcggatcggcgttgactg
>Skav203373
GCAATTTTGGCaaagcaggtgcattgtgacccgtgtgtgaCGCAGCCATTTGATTCAActtcgccagagagattttccatacgcaac
>Skav233596
gttgacattttggCCGCAGCCCTTGGGGCTCtgaccaacaaagtcgaggtcgagccttcggagcattcgcaagcagaagcggcggttgctcaggagcatggcctgttcaaatccgtatctgcttggactgtgaccggcaaccttttgcagaacacggccagcttcaacgcttacgattcgttgcccagggtgtccagggtggattacttcatcagccattcctggtcatgtccatcctaGTTGACATTTTGGC
>Skav204570
CATTGTGGCTCAAaatgTGGCTCAAGcaaccagcgcagctgcggtatcaagtcagcaccagtcgggtcacaagccgagtgcagatctcattaactcagcacactggcgctggcaagcctttaggaacccctcca
>Skav233184
GTAGGCATTTTGGgctggcgtttgCGGAGGCATTTTGGgtgggcaagatcgtgttttgatggtcattatagttttgttttggacactctccagatccgacctacagagtgtcctgggatctggcctccgcagagcgtgtgcgaaggcatttgtgcagcccgcggtaccaaatccatgaccgctgccatgttccttttttctgtggaagtcgtgtacctgccatttcgcaatggcgtttgttagatgttgtcagtcgttgagtctaatgccccaaaagacgcgaaaagaatagaaaaaagcttttatttgctcggcgtaaccacaatagataattagtagtcgatcccttatattaggcctcatgcacagcatttcgcgttatcgtgcacacttcaaaccaaaacaccccgcactagtgtttggatgtatgtcaactcaattccaatcttgtccagcagttcactgcgtttgcgggagtgcgaggtgacttggcagactgc
>Skav201500
TTGGCTCAAtgactcaaattattgatgtagccaaacaagcatagattcgagtggatttccccaaaacagcaaaaacaactagttatctaattcatgcactgacagattcaaactgaacaagttttgctgtctctgcaaacaaaggatgagtattgggaatgtcccaggatcggcactcgcttggcacaatcctccaatgaaaatcgatttctgtacatagataaagattctctcagcactgctccaatgaggagcaaactgcaaaaactgcccacaaaaaatgcacaaaaaatgggccgcgtgactggggctttggaCCGTAGTCCAAATTTGGgcgctgtagcccacatcgacctacagtcccttgtgccaaaagtggcaactgcgaccctgcgacgcgagagccaattgcgccatgcttgaggtgttggtcacctcgttctgcatagctggcttgacttcaggtgccnnnnnnnnnnnnnnnnnnnn
>Skav236364
ATTATGGGTCAAGcacttaaccaaccaatttcatagtgggttttaatcaacaatcacagggaaaacaatagattgattatttgatattaatcattatattgatcattatggcgatatcaacctgccatcatagtcgttgatgagcactgataattgatcatttgctggtcatcagtgtggttaatcacgttgttgtgctggtggttttcctcggtggtgccaagacacgatcgatcaacgtgaagaacggttgaggatgagtgattagtggttcatcatgatgtcaCCGTAGCCATTTTGGCTCAAGgagtctcggctcaggggcctcacatcaggttgacgtgtctcactgaagcctgaggggtttgaccgccatggag
>Skav200900
CCTTAGCTATTTCAGTCAAactcgcaattgcagcattgttctcctcgaatatttcgagcGCCATGTTGGCagcgctctctgtgcta
>Skav201967
AGTCATTTTGACACAggcaagtgaagctcccagcacatccgcttcagaggcagggaaactttgcatatgcttggcagccaaaaaagtctttgctatcgctccaaaggaaatcgaattgagctgatccaagagttgctgacgcttagcttggcatggctggCATTTTGGCTttcaagggtaggatttgaacagcttcccacgccagaaaaggggctggg
>Skav231215
GTTGCCATCTTGCACAAGccttcgcactgcgacacacgtgatgCGCATCCTTTTGGCTCCAAGattttgctccagagctccccaaggtttcgccgctcatcacc
>Skav221351
TAGTCATGTTTGGCctttttTAGTCATGTTTGGTCAtttttagtcatatgtctaatgatgtacatgcaactcatgtctacatcttttccctcaatcattttagaagcttgatcagattcttcgtcaggagtttgacactgacgggctgtcctctggaagagcaggactgtgtcaacagaatccttcacggcagtgaactgtttcaatccaagccgctttgaagttccccaaagttttttgacaagactgtgaagctgctgaagatggtcatggcaaaccagaacccgaatgtgcctcttgttgccgtaggacggcgtgaacattcggttggagactctgatctttcgacctcttcagcatctcaatggtgaagaggcaggttgtgaatgccgaaatagcc
>Skav218004
TTTCGCTCAAGctttgactgggaccagtgcaccagtgacttgaatccggtggttgtcacatgaactttaccagctgtcatcgtcaccacgcaccagtggtgcgatatctccacgttgggtgctctgaaaggtctggaagcaaaagggtcagtacttaaacgaaaagcagcatgttgaaagtgctattaaataggaaaatagctcccctgctgactgggaggtttatccctgcctttGTAGCCATACTTGGgcaattcaggaaatcccttcccatcccttcccctacaaaatgcctcagttgaatctgcaccgtacacaaagagtgcctgctacccactaccggcctc
>Skav214827
AGCCAGTTTGGggacccttaaaatcgatcaaaatagttggtttattactaatagattattaccattggatgaattgggggGCCATTTTGagaaagcatcatctggtgacatgagtctttgaaacctctggagtttgaaccccacgtcttggttaccgtccaaacagaggatgaccatacccttgggtgatgaccatcggctgtgggcaacttgatgccagcttcttttagggcggggcagttgggaggcttacatctacagaaaccctgcggatgggtggctcccccaaacattcggacccatttgtctctgtcaaagcagggagcagtcacgggccgcacgggaaagaactgaacgactgactctttgtggttgcaacggccaggggaaagta
>Skav203322
CGTTGCCATTTccaggagggcatcatcatgtgagcccgattttttgccggtctctgacccaaaaaaaaaaaagtcccacagcgtggacgcccgtttcaccctgaatttcgcgaggcactgagagtctgccagtgattgttgggccgtttcggtgagctggtgtaacagtctgaggcctttaaagtaatgttgtcttcagatgtattgatactgtagcaaatgctgtagcaaatgctGTAGCAAATTTGTCTtctttatttagtgatgttgatcttttctgttccactcacggcaaataccaccaaaatctgttttctttgcagagtcgacaccgttgttttgcaatgtgaacacattccctttgtgttctccaccatcgctcgtgcccaaggaca
>Skav223969
TAGCCATTTTGGttttgaaggtggcgTGGCTCAAGtcctttggaactccagttagtaaagtagctgcacccctccccctgacgcaaca
>Skav234225
CATTTTGGCTCGAGatgggtgcttttccgaaagcgGCCTTTTGGCCTCAggcagtccagcaatcttgtttgcacgacctgaaaggtgacgtctgggaactcgttcaattctaccgcaattgtgtcaaagtctcgagaagaatcagctggagtagattttgatctgcggaacctggcaggccagatgagcgcagggacctcagcggcctgtgttgggcctgttgggctgtgttgaatgctgaaagatgagtgcagattcaggagattccacacacaaagtgtcacaatttggcgcgattcatttttacgcttccaagatccacagttctggaaatgttccttatacttcacactgagttggttacattttgatgctggaaaccgatgtgtag
>Skav214299
CGTCGTCATTGTGGTCAgcggtgaatagttttgcctccaatgaagcagttgattgatgttgctgatcatttggttcaaaatgactctgcaagattcagtggcccaagaactgtgagacatgcttttgccaaaatcatgttgtagaagacccttcgagggtctgtccaaccattttgtaacgaactCCACTTTGGCTtggggtgaaccctagccgctttgcaaaaacctttcattgatagtgaccgggttatcagaaaaccttgacaccccgcaaaatggaaagcgccatacagtgaaacgcagtgaagccttgaatgcgtatcttgaacttccggcaggcagaatgataccaatcaacattggtcaatggtaaatttaccagtgttgtgcattttttatgttg
>Skav212196
TTGGCTCAAtggtgaacagcgTTTTGGCTCAAGtttgccagtttcctgtaggattgttctggctggtcattgatctcagtcttcggtttgagcccaatctctcattccaaactcaaaaacggtacagcaactagcgaatccaatgtgaatcctgctgtaaaccataaaaagtctccgggtttgaaagtacaagaatcctcgtgtatgatcacctgccgatgatacattcagtaggccaatctgattgaaagttatttaccatatacctgcaaatgtggtgctgacagttccaagagaacatgaccgagcggaggctgacatagctgactg
>Skav213758
GTAGACTTTTTGGagggggtgccgtgtatatatatatataacatatatatataagatattatatgtatatatatatgatatactatgtgcgtatatactagtatttctgaatgttaatatgtacatacgaatcgtagcaattgacAGCCATAATTGCTCAgcagcgattgctatatggctcctgtcagtcaaattggctttcatccgggttgaaatgcttctaatgatttgttgtcatttgcttttgtgatttttcttggtgtttctttctgatcggatgctttcggttctgaaggtaggaacagcagtttgagtgcagccatggagatatgttcagccttgtctggcgacacactggccgtgcttgaggcagatgagttttacgggaaatcggcgaaagaagtgaggcagttgttaacagcgaac
>Skav216727
CATGTTGGCGCAAttcctgcgcgatgcgagtgcctcccagaatgaatcgatgggatcaacttatggcccgctgaagtttgcagccagcctgaaaacctttgtgattcagacagcattgcccttcttcgaaaaaactgatgcggagcgtattgtgttgcgttggtcctttcaaaagagtacagttacggtctcagctcagtctttgcgagcgcctcggatcacatcgcttgagacattggcatggaaaactcgtgcaaagacgtggtttgcgctgcagttggtccgtgccagtgtgttgcgcttcaacacatccgtccagcaccgtgcattagcaaaggtcagcgaagaattcactcactctggttaatgcagctgaagcagacccagttgccagcgtccaacctgtgcgttctttgtgtgctggcgactgCCGGCGCCAGTTTGCCACAcctg
>Skav200504
CCTTAGCCACTTATGGCcatgatatgtttatgatcttgtcttttgtcAGCCATATATGGCTttttgttgagccatccttggccatgtagatagtttgaatgccagccttccatggccatgcatgcataccatgcatccaactcctttcagctcacaggctcaattgctcagtgtgccagaatgacattggtgtttaatacatatctgccagttccattgtcaaacatgttttttttcaatatcatttccatttccatgcctttacatatatgccatttccatgcctttacatacatgcacattgattcaccaacattgatttcccacaccagccttgtgacc
>Skav228891
CCGTAGGACGTTTTGCTGAAGgtactgctcgctgggatgtccattgggcgcatgagacagtcaaagaggtgttgggctctttgtgtaactgtcaacgattggcttgccctacagttcgatttcaacatcaaaagagtcatgttgaacatccttggagtgacttggtggattgccttgccaaggcagcagcgaaaagaaccttgccttggttggatttgccatcacatgtaccacgtcttttaagacatccagcatttcgtcatgcctggcttgcatgtcaacactcattgcttgtgcccaaacctggagcattgcatggcacgtttaagcatgagggtCCATTTTGGacacatgac
>Skav227870
ATCTTGGCTCAAaaatgacctatcagttgggataaaagtcttggcagatagaaatcaaacatccgcttatcttcacagtaaaatgtggccgggtggggggggtgcgagcaccgaatctgatatctccaaagatacctttctgattcgatgacaaggtttgggtgaagctgttgcttctaaggatttgtcaccattcttggccgggtgatcacaatagcagaagtcctgcaggcaaacggtagtggttcatggttggattgaacatgattgggtCATTGTTGGCTCAAGagaagctcaaggagtcccaggactttttttagatccgaaaggagttttgttttcgaagcttcg
>Skav209205
CATTTTTGCCAAGctcgacagtctcagagatgttttagacaagactattcagggctttcaagctccttacattatcacagttggtacaacaagtgttgggaagtcgaccgccttgcggcgactgacccagctgccattcttcccctccgacaaacagatctgtaccaagctgcccattcgagtggaagtccgcaagccactgccagacgaggccAGCCATTCTGGCcatgccacg
>Skav210103
ATTTTGGCTCAtcctggttgctgttgctgttggccaccgatgggcgtacatgtttgcatttgctcatgtattgctgattgttgccgcttccaattgcggtggtggcactgtcttttttgttggcgattgcattatgactgtatcattcgattttggtcataattcacactagtcttccacttggttgattaaacccccggacaactgtcatgtctttgattgctcctgttgcttgttatgctccaattttataactggagctgcctacccagaaccctctgtttgactaccaagattgcggatgtttacagcagttaaaatcacagctttgtttcaattcgaatgatgatttctcaaactggaggcgctcccaaatcatccatgatcaaccattaatattgataaaccAGCCATTTTcgggcctccctatttttcgagtacccagcaaaaatcaacaattca
>Skav210754
GTAGCACACTTTGGCACAAaggcatcccaagcttgtttgtctcttcgccgaagcgatgcgtgtgattgtgaatatggacttcttggtctcagatttcaaccaaagccttgagaccacgacgatgctgttcggctgattgaccttgattttgtgttGTAGCACACTTTGGCACAAaggcatcccaagcttgtttgtctcttcgccgaagcgatgcgtgtgattgtgaatatggacttcttggtctcaacccatttgaaaatgaatggcaaggatgttgtgggtgatgtgaagctgtttctttgccagattacgcaagttcctgtgaatgctatgattttgaagtgctatattggacgcaaatataccactcttgatgatgacacctgccttgaagctttgacagctggtgatgagctgaaacttaatatggagacactaccaaatgacaaggat
>Skav225781
TTGGCTCAAagctggccgcttgtttgcggatccgctggcatggaagaatcaccacttggagcgatcagacggcatgattaatcatttatagttggcattctggtttacctattgaaaatggtgatttctgacttccaggctagttttccagagagcaacaatattgcttattgttggcatatgattattgttgctgattattctccatccttgaccttgattatcttggtgagcatcatcaactatctttaacctctttcattcccagtatcaaccatgtttgattatctatttttctcgttgcaatnnnnnnnnnnaaccgctatcatcaaccttaacgaaccattgctcaatcgcaataccatcataaattgaTTGGCTCAAtgattgctcatcataaatcgacaatccaactcataaatcatggattgatcatcaatctgactcacaccaaccagca
>Skav207595
TTTTGACTCAAaaccatgcctcaacatgccggacactcgggcatgattcccgattcttaaagctgcgatttgaaccgcgaagggacgatgccagctggacccacctgcttcacAGCCGTTTTCGCTtagcagcg
>Skav221765
CCGTGGCATTTTGtatggccactcatgctccaccccatgttttctgacatggaCCGTAGCAATCTAGCCTCAAcatatgcgaccggtggcccttgggggagtgtcaggtggactggcatccgtgttgcttaacttgttggctgctccttgggattaccagcatccgattgtgcatccgaccccaccagtgttggctgctgctttggattgggatagggaaccttggcaattggacttgaaaagccttcttttgggggtgtttctaggcttcttgttggggcctgtgatagaggtgttgtgcctcttacgccagctgtggttgttgcagctgcgccagtggtttcgggttgctgccacccctagcccaccgcccagggagccgtaccgagtccttgg
>Skav212586
CCGATCCATTTCTGTCTCAtaatggtgtcaaatgctttgccattgaaccgtttcttttcttgcttcacatgccacctttgctcgttgggaggatctacagttttctttgagtgcgttgggagtgcgttgggatgtcgtccctggaaaggcatgcctgacaggcatagtggttggctaccgctgcagctcaactgctgccagcagtaaccacagttggaaactgtgtttcccaatagcacttcaaagaaagaccgaattgaagagacacctccctaactccgtaaaagagtcgctgctttgagtgttgatcgaatataatagccattcaggtttggcaggttcggtgatggtcttttatttgtcaacatcaaacacgaactGCCAATTTTGGCTCAAGatccaaaattggctgtctgctgattttgtcccacccttcccatcccttgggaatttttgatttcgca
>Skav221113
AGCCCTTTGGCTCtcggacacaaatgtcaatgaacagattccacaaagaaacaggtggcctcgtttcttcaataattcttgcacgtttttgaTGGCTCAAGtgacattgcaacaatgcgcgtcattagaatcactggtttagtaggttcggtgctttgccactgtgaagcagtatcaaaattgcattcaaatattttagacta
>Skav212813
CCCTACTATTGTTGCTCAAtattgatggttaatattgacccatacctaaatacttcctcattttctccatgaatccccagtcaagcgagctcgcgagctcttgcagcttgccttccgctgaggacggactgggttttaccaccaaaggctatccacagctgcatgtcgtgcccgcggctcccagttgcagagcggtgtgcaggaaatcgacgataggtggcgctccatccaaagctgtgtgctgtgaagattagttagtcatgggatcaagtgacttgattagttagttgttgtgattagttagtttgttccccgaagTTTGGATCAAGtcccaagatgtcccaagtcccaaagccttatcaaagtttccagcttgcgccaaaggccaaactgctgtgatcacaccttgggcc
>Skav225431
CCGTGACCCGTGTGTGGCTCAAGggtagttgaAGCCATTTTccatctttgtcagtcgtaagccgcaagtggtcgcc
>Skav204465
GCCATTTTGGgctgcgatctcgatcaagctcattggcttggctgtttccaaccttagttggcgggatcatggttggtcctaatttctttcaggggtggaaggtatatgccttaattggtttctgattcatctactatacggtcatgtttgtttgcaacattaattggtttatttcaagatcgatattgttcagaaatctcatgggtataccccaattctataatttggtttggttagattgttggcctcatggctgccaaatcgctcacctatagagcatttgacTGGCTCAAGacttgcttgtttctctagtggtgcct
>Skav215591
TGGCTCAAGgaTTTGGTTCAAGcaccccctctgctcaaatcgtccgctttggacgtttgatttgaaggccatggctgttttcgctatcctctccctgctcctgccatccatggccatggctgaaaagtgggcggtgattgctgctggttcccaaggcttcatgaactatcgccatcaggcagatgcgtgccacgcctatcaggtcatggtgaaaagtggagtgaaggctgagaatatcatcctgatg
>Skav213821
GCCTTATTGACTCAAacgccatgtcttgtaacaatatgcttggcatgcatcgaggtttgtgcattcgtccgctgtggtaaaatgccgggacaaaccccgtaccacagcgtggtaaattggggacaggttgagccaatgcagtcgcttgtgctgccagtcatacgcaacagatcTTCTGGCTCAAGagtgcatgtggcacaccgcacagatggacgcaaatcttccgcgcacgaaagttgctttcgcctgtttggtagacgcaacgcacttttacaccgtgtgctcgctgtttagcgactgggctgcatcaggattccaactgctcagctccagaatcccaaccggcctgacagaagcagtaattcaagaagtcattcagaatgcattcatgcgattgttgcctttgtgtccttgatgt
>Skav218255
CATTTTGGCcagggcttttTTTTGGCTCtgacaactttgggtggccacttgaggtccaaaactatgattgggtcaatgcaaagtcgggccccaagaagaggcggcgctgttgatgttcaaagctgcgtggttgcgtccggccttgccgtggctgtcattgtggggctaaggtcgtatagcacagatggcacgatcccagtgaaggttggcttttgcca
>Skav203013
GTAGCCATTTatagtaataaaccaattattttttgggtccactattttgagaaaccaCCATATGCCATTGGGCCAAGagtttgtggagcggtcaagacgggtttcatgttgaacggtgatgtaccgcttctttttggttgccctgcgttttcatgccagtaccccggctggaggaaatgaaatactcatgaaactcggtggaacatctgctttcgaggcactcgacatacggattgggtaagtgtcaagaagaggaatgcaccaagtacagctgcaggtagcccatcatcaccctggcgggtggcccagcatagcgtacTGGCTCAAGggcaccacctgtggcgacctcaaccgac
>Skav210636
AGCCATTCAGGATCAAaaCGAAGCCATTTgtcttcatcatgcgggttcttacgctttcgggggagaccattgctgacctagatgaaacctttgttcgtcaaattccttcaggtgtcggcctgggaacagcagtgaagaagttcttgcagcctctattgggagtgtcaacttatcgacttaagctgcttcttgcagatcaagaagttccagatgagatgcctttgcttgacctgagagtgacagaagatctacagcttgtaatcttgccctattgccaagaacttgcgagggagcttgtggatgcagctgcatctggagatcttttccaagcgaaacgatttctggagcgatcgcaagatccaaacgtcaaatgtggcgaatggttggcgccattgcacgctgcttctcgt
>Skav220598
TTTTGGATCAAaatggtgggctttcccgaccctcgcttgggttcagggggctgacctttgacgtggagggaattgcgtgagggcctgaacaaggtgccagctgcggggatggaagcccagggacgagggcagcttgtcgaaaagagtggtgccagtgctgtcAGCAATTTTGGCTttcacacccatcaggagcaacatgccatgtcagcatgcacagtagggcgcggcctatccggcctatccatcaccaagagcagcttcctggaaaagcgctcagcgctcgaagcacatgcaaaaaacaaagattcacgtgcaagacgcttctaccacagtatcaacacgattaagacgaccctgcacctcacactcgtttcgccttgcgggttgtgggc
>Skav212392
GTAGCGATTTTGaaactgaagcactgttgtcctttgaaattccaaccacgtcaggtgtttccatgcccggaaaacatcagtgtgaaatgctttctggaatttgacagggaatcactgctcatatctgtgatgctctgacgatgtcgttgttgtggtgcgttgaaattgtttagatgaagcttgaaggcgaaagggtctcgcaagagtggtgaaactggggaaaaacaatttaaaactttaaattcaaaacttttgaaaattacaaaatagaaacgatttgaagttttttgaaagtcatcagctctcgatttgtacttcaaaagtgggtcgaaggcatgaactcttgAGCCCTTATGGCCCAAtaaactgctcgagccattgtaggcccctggtttccacgcc
>Skav216837
GTGGCCTTTTTGAGCTtcatttcgcttgggattgctgattgttatgaaccattgtgaacagtttgttggatggtaaaaaatggcGCCTTTTGGCTggattccttggtttagattcgccattgaattgtagtcatatctaccacaactggtagttgccctagtgagcaaaattagttattgatgagccaacaatcaaccataaccatcattaaccttgatatcgaccaaaatcattcagtattaaccagggcattaaccactattaagcatcatttaccatcattaaccatggacccagctgccgactccagaccgtcgaacaactctgcaggccatacgtaaatcacccgaaaatcaccacaggaccattgcacaggccatcactggtgcctcc
>Skav220141
GCCATATTTGTCAAGaggaaacatttgggataacaattgtgacaaacatatgcaaacatgttctctttagatgtttacagtggatctccgaaagaatggttgatctgaaaacgacgacttggcctttttcgagattagaagtagtttgggatttgtagttttaactcgcatagcggcatagcgttgatcccatagtttgattctcctcttccagacactgttctactgtaaaatggcatgtcgtagcaacggacccatggtgttgTTGTGGCTCAAGcgaccagtgcagctgtggtttcgagccaccaccagtcacgtcagaaagctgagtgacgatttcatccgccgttaagcacactagcgctggaaaggtttgaagagccactcca
>Skav221365
CCATTTAGGCTCcaacatttgagactcggagaaaagttctgaaagtgaaacggcatgtgtaaatctgacagaatttgaattgaattcgacatcatttgacatcgtttgacatcatttgaccacatatttccacagtgttgccttttggtacttgcgccacagtatgaagcgcccacggcggactttgagaccgaccaacgagatgacaccgacacccagagtcaagatttctttgttttttaccatcaaggacagtccctattccgaggccaagaagctgatcaCCGAATCCACCTTGGCTgctttgaacacatgttacaagccctcggatcaaactacagttttcttcgccgctgcgcgtgagactggccaggactcctcggcatcggcactatgccgt
>Skav231722
GCCCTTTAGGCTCAtccaagtgatctttgtcgaatcttcaaagcttttgaaagctcatccgatttgaagCGTAGCCATatatccagtggttggaaggattctctaagaagaatgttccttcagattccacaagaaatgtgatgccatcctccatcacaggctacagctctgcctccagtgttcgacctgctctcgaggtgac
>Skav212815
CCGTTAACCATTATTTGCTagtaattagtatgaaccactatcattgactctttttctaaatcattattttggtcattatgaagcactcttgttgatccttactgttaaacatatagaataatgattataagcaacaatgattaaccaatgctatacacccttagcattaatgaggattgtacaccaccatgaaccgttaaacatcattgtgaaccatgcttttgagccatgacagtcaaccattgctgttaccaatcattctgattcattgtgaacacaattttgattgaCCATTCTGACTCAttcttcatactcattgtcatcaaccattctgcatggatcattcaccatggccacaacaaacccagccgaggttgcagggtgttcgagcagaa
>Skav218032
CCGTTTTGGCTgacggaaacgcaggagggaaatagagctgagagccgaaaaaacgataaaaggaaaaaaacgataacaatatatacatacatgtcaaatagatagatagacacatgtgctcagatgatggcattgggactgcctgtgacgAGCCATTTGGGCACAAagcatcaacgtgcccgagcgcggttctgcacaaggagcggggcagtgccagtggcatagttgcaggaactgccagcgtgtatcactgtgattgagcaaagcctctgccaggagctgcaagtttcaggccttcagggcggatccacaggcttttgacctcctgcaactctacagtttcacggaagctccagccgccattcttctccgcggacacaaatctttgctgaaatcctatgagtggcat
>Skav225361
GTAGCTAGTTTGGgtgatgcataaagttccatttttatcgtttccttccacaaaacaatgttataccagttatgcaaaaataccgctagccgctaggacctgcTAGGCATTTTTTCTCAtaaattcagcgaaacacttgtgccatcttgcgcctgctg
>Skav201789
CATGTTGGCGCAAGcTGGCTCAAGcttcttgcaacctggcacaagtgcacttggagctttcttgctgtc
>Skav217529
TTTGGCTCCAGccgccgtgagtgtcgagtatcgccaCCGTTGGCATTTTactttgac
>Skav221690
CATTTTGGGTCtccgtgcttggtccaggcgaggtcgtcacccacatcgcttccaagtttgccctggctcctcaacgcgttgaacgtgcggccgagcttttggaggtgtagatgtggatgcagcagagggttatgaagtcatgaagcatggtgaggaatggttgggaagtggcgattaccatggtagatgatgaaccattttcaacaatgatggcttacagtatattacagtattactgatgagcatagttgttcaatgcttagtgatatttgctgctcttactgctccaagactgctgtgactggagttgggaatggttgaccaaccagtgtggttgtgaatcggagcggcaatcaactagcgatgcttcagtgccatgccaagtactgttgatattggctattcacagacctttgagcagcttgtgcagcatctccctggttgtTAGCCATTTTGAGCTgtcaagatttctgagaggtggaattgctgcaatcgca
>Skav213514
CATTTTGGCccTTTGGCTCAgctcaactcacgctgtctcaaactagtagtagggttattggattttctggttagtagctgtccatttcTTTTGGATCAAagtcgttaaactcacttctctttcacccagtcttttgatatcgcggacttcca
>Skav236660
TAGCCATCTTGGCTCAtaactagggtaaataccagttatggtagttatagctagtgttaaatggcttattgatcaacttacgagtgggggtcccaccttgaacctgatgaaatctgctggtTAGCCATTTTtcaccaccaccgttggcctccagcagttatgaggggcccaccttgtattgcttgagaacccccgagtcatggcagtccccagcagcagcggcaccttgtgaggtccca
>Skav211466
TGGCTCAAGcagcatttgggtactctcggcatctctcagttctaggcgggacactccagtagtgccatgacgtccagtaggagcctCCGTGCCATTTgcgcagcttgcatcgctgtgctgagtttgcgggtgctgtcggtgtcgtttagcacagcaaggacacgggttgctcgacgtgctgggtacgaatctggcaagttgaatgtgggcgcagaggtttccgacacggacattgcaccaccaccgccacctgtcttggagtgtgatgagggctgc
>Skav215251
GCCAGTTTGGCTCAAGgcatcgacatctgtcatctcgccttcacgagggaatggcacatccgaagaggctgctgcgtagttcgccatgttacagcgagagtgagggacaggggatggtttttcacaaccagtgggacactgtgtcacaatcgcgtcacttgagccaaaatgtccggtggacattTTTTGGCTCAAcgttccaaacatatgacttgcaaccccaagctaactgaaagaatcaaatttcacccagcgctggactccaaacactgaatgtatctta
>Skav204159
CCGTAGCCATcggtataatactattccccacaaagtggtataccggttttatgtaccggtacacttgcataatagataatcataaatgtctaccgtgactgtagtataatctcaggtaatgacacacttcccagtctcaacttgggcaccttcattttttcaccagccTGGCTCAAGcgtgagatctctcgacatccgatccgagagcatcgttggttcccc
>Skav224251
CGTTGACCATTGTTGACTCtgttttaggctatgttgcgccaagacgggacctatcttcagcacctaccaactcttctatataatgtttgttgtaaatctttaatgacaaaaaaaagtcatgcatttcgtgcatacagttgttgatcataatctggaatcgcaatttcatggcgaaaaaacaagaaaactgtagtgcagtgaggccatcaacccaaaacatcgttgggacgtgttggggtttcaagactgagggaagggttggatgcaacatcgcaattcggacttgcttgataaactaggctaacaccgttccccgtcatttgcgttgcggctaattgcgtgcataCGTTGCCATTGTGGTTCAcagctctttgtcacgtgagtgtgaaggggctgcttgcgcttgtgcaaaatgacgcacaggctccaggtgcgggttagttgttgcattgcagtcaaagacagcgccaagcgtaacaccgcaagttgcacaaacgga
>Skav223855
CGTAACCAATGTGGCCCAcgaaaagatgatcattttgactgggggtaccactatggctgggcacatgcccatatgtttggcaaccttattggggctggtggagaggaagaacacatatgtactaacagtttccgcctaagtttgtaccctagaaaatcatctttgtggggtgcgcacgatctgtcttgcaaatcaacgacgttgacagcatctggatatactggtactgtatcctagtcgagtctttgctcgcagtgtgaagcgagtctaagcatcatggtttgccgctcAGCCATTTTGGCTtgaaatgtggcatctaagacctttcgtcgcctgagaaaacgccaagggcgattc
>Skav232766
TTGGCTCAAGtcaaccgttttttgctcccgaatcacctgtgacaagacgggtgtcattattgcacgaaagaggCCGCAGCCATGTTGaagtgcggggcacattgagtcgtccatggcccacctgttgggggcaccgctgcacggcttgtggggttcctgcttccccgctttccaccatgtttgcaggtct
>Skav215532
TTTGGATCAAGcagtaacatcaccatggaggtaagcagccaatttcaaccgctggcaacacatgcgcaCATTATTGGATCAAcgttgacagtttctgtgtttcgaaggtttcccatgactccacagcttgcatgtctgaaacccaacgaagtcaattgtcgtccatcagaaagtcatgtacttgccgcgaagtcagcaacttttctgctgaatctgtccttgctgatttg
>Skav226833
GCCATTTTGGgataaacccatatagtagtcaaaaatcaaccataaactgatccggatcctatatttgttgatcatgcatggtgaaaccatgaagatgaccaataatctctagttgtttttgaccgatgaacaatcacaagcataaatggttgtcatttgttttcaaaacaacgactcgttccagcttggtgattgaccccaggacgcgtttggaccaccgctgtgagaaatcctgctatcggctgcaagacTTTGGCTCAAGaccagaggaaatctgcg
>Skav218801
TAGTCATTTTGcagcggcttccatcgctacggttggttgatgctgctgtgcaacgccttgatagcTTTTGGCTCAgcgctgtctcagcaagtcaacttgagctaaagagccttggttcgcacctcgaccaagcagcaaacatcttgacacttctctagcagcccacgttggaaaaggatgacgagtgattgtgcattctcagtcttttgcagtccaagttgtcccacatgtgattgcactttttcttgatttgcaccctaggccctccttcagctaga
>Skav230945
ATTTTGGCTCAAaCCATTTTGAAGCTCAActtcgctgtgcactgctgtagccgtcatgatgcacacagctgcgttgatgcttacattcgcg
>Skav224029
CCTTTTCTGGCTCAttcagattttcagaagaacctttctcaatggttacgcaagttcattatcttgcacaaggaacatgccatccctttgcatcttcccactcatcatgttcgtgaaaaagcttttgcttcgttgaaggatttactacacaatcatcgccggtttgagcgatcctatgacgtcagtgacccgtcccgGTTGCCATGTTGCTGCAAccttcttcgacccttgttgcaatcaccgcatgaatgtcagtttggaggtcatttagtggctactttggaacagatcaagttgcccaaacatctctcgatgtttcatcaagctaatgcaggttccacgtatttc
>Skav220414
AGCCATTTTAAGTTCAAGtagtgtttgaaggacatttgtccaaactacattttTTTTGGCCCAActtctttaagttgcgcctcgtggtatagtgtttgaatgctagtttgttgctgttcccagtcagaagatgtcggagaggtccctggaacatttgcttttcctgctttggagcagctcccactgccggggttagactttggaagcttcactgtggaagtttctgccattggtcgcaatcgtcttcagatggatacagcaggagaacatggaccg
>Skav211000
CCGTAGCATTTgaaacagcaaagatagctggaaagaatttggaaggatcatttcaagatcatgaaagatcctcttcatatctcttcatcatcctttatattaTAGCCATTTatgttcctatatgccttctaaatcaaaatgtcttcaggtgtcttttgatgtgccaggtcttcatgctgagacggcatccacttgtcatgtcacaagggtcttgagtacatgtgtgggcgcgggtcctcgtcaggccaacatcaaatgctttcaatggcaatttcaccaagtcacccacaatgaccatagcaattcccaggtctcaatgttcgaaacaacctcaaaatcatgaaaacaagtgaaaacactcaacatctctcaacactctttgctctttttacccttggcc
>Skav233161
TGGCTCAAGgagTGGCTCAAGctgcctccgtgcgggggcgggttcctctcccccctcgggtcctcagtgctccgttgcccggtggtggcagcccatgtcagtctgaccgctggtgtcttccccatggggcagcggggcactgtggccccttggggcggtgggggcatggtgcggcctttgtggcggctttggatgctgctgatgagcgtggggcctgtccaca
>Skav206010
CCGTAGACATTATTGCCAAtgatgacatgacagTGGCTCAAGagattagcgatttgaatagagattgcaagctttgtgcgcgaagcacatccaattccaaatgtttcaagtgaccgcatcctttccaagtggaaagagaaagacaatctcaatccgacagctttccactgtgagggacttgaaagtgctggcccagaagtcgttcggacggaggttcctcaagctagccacagaaacgggacatgcgctgaccaacctcacggactctttggaagctgcaggcattcgagatggggatcacttcacagcagttgtgcaacaacccaggattggggcaacagacagggcttttgca
>Skav208892
CCGGAGCCACTTCGCGCAGAAGccAGGCATGTTGGCACAAaggggcggggtttgccgccgtagcagttgggacacctggtgaggtgatggtatgggattaagatgcttgagaatgattcattcttgatttggctggtgattttgaacattctctcccaaaggtattaacaaatgatttgttggttgaccagcatatctttcataggggtgcttcaaccaccaagctgtgatttaaatcatgcgagaacatcccagatcaacatgcttgaatatgactattgagaatacatcacgattgatcatgggagatagcaaagtgatggacaaattgttcgtcaatgtgggattatgaagctaagtggcttgatagaagttttgaatccatgaaccgggaatagccaggagcgcggccaagcttacagcggatgg
>Skav232531
TGGCTCAAGtatttctgcttgaggtccattcctggtgcctttgcaaataggaaGTAGCATTTTGGgcagtggatccttttctcttccgcagaatgactggtgcatgtgaagtgtgacctcatggaaaaatcagattgttcgacgtgatcatgtctgatagatcctgacgggggcaaagacgaagcacttccttcagagtgccaaatgcactacagggcgaattcgcagaaaatttcccgatcgcagaagcatctgcagcaagggagttgcttcaact
>Skav234415
TAGCCATTGTTGaaccattggttcatcatcaacaaattgcaatcattggaacggaatcaggttgatcctttgggccgctgggtcgagacggcaatggagacggcaatcatcattgtttgttttgatgtttttgactaaaaggttgtcttcctattttgatgttttgatgttttttttagaagactagctattcagactggcaagcacagatataattacggtctaaattgttggttagtttctgttccgtcacatgggtacacagactaaagctatgcaggactctctagcaaacaaacctggttgcgtagaaaagccagcatttcttaattctagatagcttgcctattggaaatggtgattgcttcaatgcaacgaggctatcgcaagaacaaaagGTAGCCATTgtcatcagtcgaaaattacttcactataatcaaaagtgacaatcatcc
>Skav231885
TGGCTCAAGttttgggtgcgaaggatccgggtgtgtctttagcagtgctcttgggagccctacgacttttgaacctgcaaatttgatggatacttcaggtgaagcagatattgctgagaatcgacgcgtagacttgatgaaatccgcaataaagaacagatgtgatttgaatgtggtagatgcaagaccagctatacaatttcatgcacaccatgtcgccataccaatgataccagtgtcaggctgagcaaaagaaacatcatcaagctcatcactgtcaattcgcatcaattcgcacaaaataaaaatgctacaactattgatgctggtcagggaaaaaatctcgccgGTAGCCATTTTaaggtgcagctaggtagcaacgttttgatttgctgcc
>Skav207027
GCCATTTTGtatccatctttgcagtgcagtgcagagtggatcctgagctgcgttgggatcaaagggctctgccctttgtgcagacctggggcaggttcaaccgttgaaaaagaccgctgcagcgggagactcttgtggcgatttgtggatggcatgaagctgcggatgtttcgcttcaagtcTTTTGGATCAAagacaaagcctgaccgcagtgcttcaacttgggaacactggtcactgggccttcttgtcagagctggatatggtcatagatgcgaattttcagccgtaaacttaaatttctggattcaaagggtgcctgtctgccttgtccc
>Skav223492
GTAGCCAATTCGGgcccactgttggggcccatggtctttcagtaggcagcatgtttcacaactgcaagcgttcaacccccaaacgctccAGCCATTTTGCTCAcagcccgacgtcggcctcgttttgctgcggtgggtgtatctgtggatggaggagtcactgatggttgtcaatgattgttgatgaggaattcctaacgatcagtgttgttcttatgatgtttggccattcttaaggattggtttctgattttcaatgatgattttattcttattgattatttcaattacttttgatgataattcatggcaagtgatagttgttg
>Skav217995
GCCACTTTGGCAAAAGgagatgcttagattttcctgtttaagcagcagcattctaccatcgttgattgtcttaaagtaaacggttatctaccagtggatatgcaagggatcactacaaagcaacatacggaaacgcatggttacaagccgttatggtgggataacacaagcatcttgaacaccgcttttcttggcttgcgctttgagcctcgtttgttttttgcattgttggcttgcagaatttcaagatgagaacctgctgctttttcatcgaaccaggccgtttggggatccagggctagagtcgaaattgtaaatcgagtgaagggtgcttgtgcaaaagtgaggcggctgacatgcattgcaggccagaagggagcgTTTTGGCTCAAcaagttgttggcgcgcttcgtccaaagcc
>Skav219587
AGACATTTAGGCTtgcagggtgctgCATTTTGCATCAAGgattcagcaatcaactttgcatcctcgtgtaacatttccggtgatggtgatgagaatctgtgacctgcaaagggaatagatatgaatagatttgaatagatatgaatagatattgaatagatgtatgaaaagacatgactagatatgaacagatacgaacagatgtcaatgcactgaagatttctggtgccaaaaagcgctgcgcaggcatggcggtagaggcggctgccaggtgctgtgacaggaatgaactggcgacgtgtcgactttttgttctctatgtaggagtgttcgcatacttgccctatccatgtgtccctacttggggtttgcttccttcaattcgaaaggccgggaattcaaaaagagtcgagcaagtgccctgacaggtct
>Skav220777
TTGGCTCAAGctgagcacttttgggattgtagctgtGTAGCAATTTAAGGTCAcc
>Skav219959
CGCATCTACTTTGGCTCAAagagtatgttggtttccttgtcaccgcgctttgacatgaaccatgcctccaaagaaagtgcctgtgaagaaaaacctgccgagaagaaacctgccaagaaaattgtgaagaaacctggcgcatccctggcagtcccacatacacaggggCGGAGCGAATTTGCCCCAAGtgcttacagtgcttcaagggagaaacctttgggtggtgtgatcgcaaagaactgccatggagcacatgttgtggctggatgccatgaaggagacttatggggagcaagtttccgcatggtcaaagtatgtccaggacaagtcgaactgttggcacttgtttcagacactgcacgaa
>Skav235531
GTATGCCAGATTTGGTTCAcacgtttgatgccgatttactctactccttggacaacttatgcgccgcctgatgctgggtaccggtacgcgttatctgttcacatgcattcttgcaatgcatgatgagacgtacagtttgcacaggcgtgcacacccgattcttgcttgtgtttgcgcgaggcaatggaagcaatggaagcaatcacagcaagggtcccAGTCGTTTTGGCGCAgcttgaactttccaattgtttggagtctgagcttgggccaacggcggccaacgctgttgattgctacctacctgaaccactttggtttggcacatgaccttgtccacaggaagggtgacgtggtgccttcatggtcatggcttggctcaggcccctcaacggggacatgtcagtagcgctgtgggagtttcagtaggactcagtgcgagctctggtggcgccac
>Skav221802
TTGGCTCAAaacaagagcttcacagtgcacacagtgcacacagtgcacacagtgcggaggtgatcggcggtctgtgaagtttgcagctgagattctttgagactccttgcatcttttgggcatccttgtgattcttgtccaccgaccttccactgtcaattttgatacaaacttgTTTGGCTCAAGttgggctgtcaacatagtttggctgtaccaactcgTTTTGGCTCtcagagtctcatctggcgtcaggggccctaatacttccactacctgctggccaaagggggcgtacgcgatgtccacccctagcagcagcatctctctgggctgtgaacctttttgatgaattggagtcaagtgtcaaaaacttctggtcgcactggaactgcgagaggttctgatgcctggcacaacctgtcgttgaaagacaagttggttggattttgtgaacattgcagagatggtgattccggtcacccagcattctgaggcg
>Skav216536
TATCCCTTATTGCTCAAaatcccttcctactgaccattcttaacacttttttctaacggtcctgtaggtatcgttactcctttattgcataatttctatatgcatgtggctgtgggtcaaaaccctgtacccctggttccccatcgttaagcattgttttccctttgatttggctggtcatcgcaagccattattgatgattaatattgacCCATAGCCATGTAGGtaccacaactaaccacgactaaaccaagcattggaccaggttcccccgtcactgccttggacgaaacccacccgggccttttgttggttcccccgaggtcgaccgg
>Skav203160
CCATTTTTGCTgattagcaaatctgcattaatttcactgccttgtctcgacaataggatccgagataagaggtacagcaagcagccagcagcaagcagcttttagctgccacgccggatcgggacccacgtcattcttcgggaagccacctgccccacatttttgggcccggagctgtggtgtctcacctggtgaagtgacagaagtgacgcttggtttctgggcggctcttctgcacagcgcgcagtgggaagtaccagacagtgcgaaattcgcaaaagcagggctgccgcaaggaaatgcaatccaatccattggattaagagtgaacagatgtgaaaggatggatgtcaggtgctgatctctattctgttcgattccTTTTGGCTCAAGtgcaatttttgaaaaacatgtctgtagggcacccgggtgaaggaggtggggcgcgtgtcgagggaca
>Skav235081
CCGTAGGTATTTTGatagctttataccacatacatacatgtgtattcatgtatatatatatatatatatatttgcacatatattcatgaatacacatgtgtgcatatgtacatgtacatatgaactcttcatcaccgatgtgagtagtgttgtgcgagtaggactgaagcctttttgatggatgcgGCTATTTAGCCTCAAGgtatttggcttggttgg
>Skav213442
AGCCATCTTAGCTaactaaggaggcccaccttgtaggaatccttaccggcatgttggtacctcgtcagctccagcaacgaggtggtcttccgtgctgtgagactgaagggcgacctctccgcctacaggctgcggcgcaaccgtgcctgcttcaaaagccccgagacgttgtgggaagatgtgatatggtggtgttcaaAGCCAGTTTGGggaccccaaaaatcgatgctctatgaacatttgattactagaaatggttcatattggatgagttggaggtatccctatgacttgagaaatcaccattgtagacttgttgctcacgcgcaatgatgtctataaattttacaacgaaacagacaggtgtgctttgtcaaagttgatcacaaacaatcgaacgctctgagtgtgctaagttcctggctcagttgcggtggtggcacaaatatcttttc
>Skav227090
CCGTAACCTTTTTcctgctattgcgctgcagctttcccaatttgcaacagagtaccttcaacagtgtgccagattgaagcaattttatgaataccttttgaagctagctgccgaacgggagcgtgttgtggttacaggcgatgagattcagaccattgctcaaCCGCAGCCACATCGGCTagtggatcagttgcgtttttatgatgcgggtggagactggacatgtcctcgcgtttggtgcgaggattggctctcctacagtgcttggggacttcaaactcttgctgcc
>Skav224946
AGCCACTTTTGGCgattaaactacccagcttgtggacagaagtggcgccagaatcgagttcagtggttgccggattccaaagacatcgtttctctagtgaaaggggtcttttttaagataaaaagctgcgaatgccaccattgatggcctgctcgccatttgttttgccctggagtttaTAGCTTTTTCGGCTCAcagttgttgggccctgtgcaccgcgtggcagcg
>Skav220974
CATTTTGACTCgtctcattctttctgagcgcTTTGTCTCAAGttccttcccagaacgttgcccattgttccgtcgcc
>Skav216340
GCCACTTTGGCTCttcatcccctagccatgctgctggtgggactgctccttgccacatacgaagggcaagtgctggtgcctgctgaatgtgtcggggatgccacatcagaaatattatgtagaaatgcatcagagaagcccaagcttgtacctgggttgacctcccgatcgaacctccctttgacaaatttggcaggtcaggaggaccaagttgtcaggaagtgacaaatatacatttcaataattttcaatgagtaattgacccacggtagagaatgccaacaaatgaggagttgtgacattttgtgacacataagatacaatcatttcagggaatatgaggggataccgtgataaccatttccacAGCCACTGTGGCTacgatatgtgtcattggctcattgccccccccccaaacctggcggaaagg
>Skav204073
AGCCATTTTttgtggcaacctcaacttggtctctcgatgcacgTTGGCTCAAagcttgcgttgcatgttttgatcggcttcgattctgttggttgaaacggtttagccatggattcctgggagcaagtcttgtcggtgttggatttgacggaataccggcaagaacttgtggacgcgggttacaatgatttcaaggcttgctgcctgtccatttttgttgtggatttaagaatttttgaatcgcacaccgcaagtgtgaaggacgacgttttgtttgtagtgattcatcttgcttgaagcttgtgttttgttgtcagggtgcaggaatggggataggaacatctctgtagtttgcaaggtcatacctcttcttttgaaagccatgatctgtttgtttgctctgaaattccagtcagagtcctttgcaggcattg
>Skav232540
AGCCATTTTtggggtcccccatttggagaatccaacttggcttctgcaccacgttctgcctatccaccggtgtcctacttgatGTCGCCATTTTCGCg
>Skav216651
CCGAGTCACTTTGCCTCAccacttcaggtggaagctgatcgcaaggtggtggtggaattgggctatttggcgcttcagtgctgcctggcatccagaatccatcgggtcgagacgttgggacctggttgggatgtttgatttgcagcgcagacatgtacaaacataattcacccttgttttcatagactgctttgcaccatgttgGTACCATTTTGGCCCAAGctgtttggtgattctcaagttccaagtttaacggcgcaaaa
>Skav205163
TAGCTATTTTGGggtaccaccattgatggacaaccccatacggatatcaaacaccTTTGGCTAAAGttgatccactggatcgagggtatacacctccgagttgggtggcgacacaggtactacatccatatttgagtaccaactcagatagcaacatcatggatcatccaaggatcattaatgcatcatacatggatcatccatggatcatccatggatcatacatggatcatttaaggatcattcatggaacatccaaggatcattcatggatcatccatggatcattc
>Skav210511
ATTTTGGCACATACCCATTTTGaacctacgattttagttccatggaagtagcttttatcaatcaccatcaaccactaataaccaatattaaccacgatcagccaggaatttacattcgttgactattaatcagtcatgattgaccgttggctcatctgcttcggccatattaatcaatatcaacctcgactactcaaccatttgactactcaaccatcattcaccatgaatcaaccatcattcaccatcaatcataatgagttcatgatgaatcaaccatcattcaccatgaatccaccatcattcaccatcattcatcatccttcacccatgaatttccccctggcttcgccgttgcaggacgtggatcacctggacctggtc
>Skav234476
ATTTTGGATCAgatgaattcaagcaaatgtcatgttgattgttgcttgtttatcccctcctcttgaaaatcattgatttaagtgtccttagtcattagaaagtcatttatcattgtaactgctttcaaccatgactagccatgattttcatcacgattgaccatcatcaaacatcatagttcactatgctgaatcaaccagcgaagtgttttccattggcaggtgcaaaaacgcgcagtgccagggcaagcgcctcagaagcttagggccatcgattttctgtttggcattttggatgtgttcaaactcaaagtgtttttgtggttttggaatatgtttggacatgttttggacatatgtttggatacatttcatgtatgtttTAGACAATTTGGCTttgaattgtcggaatcctggaatccagccgactctaccaccttcgtggatccctcagcagcccacggttgaaaattgacaggcctggtgcctac
>Skav206628
TTTGGCTCAAGaatttcttgcctagtcttcctctttaaagtgtgaaaaggcgttttgggaccttttgaaatcatttgaagatggttcgCGTGTCCATTTTGGtctttctctgcctcatggccactcccctggccgacaatctcctcaagagaaaaagatccaaaaggtggaactccgggacctcttggatctcactgatcgagagcgatcaatgcccgcaacatggacgcgttcgctgtgaacgcaacggtggc
>Skav204952
CGTAGCCATcagccatcaatcatccataatcattcctaatcataatccactagttggtggtttcaagGCCATCTGGGCCCAAGtcccttccagcggtggccggagcgagcgaaaccttgggctgggtttctgagttgatacgca
>Skav230023
GTATCCAGTTTTGGaaacagcgcaattatagtcattgtttcccaccagtaaaaccattgatcactatcatcgtttttttgtgcaatctcaccactttttttttacaagtatattTAGCCATTCTTCGCaacattttggaaccattgttgcgcccatttcttctcaaaagttatcattttccaatgctatttaaaccactaccaccatataaccaaattcaacattgtcattaagattggggaacgttgaatggttaatattatcaatatttttccaaatggttggttcattcatttaacatggctcacatccttcatatcttgaaaacgatattgatgatatttcccacattaaattagaaatggatcagtgttaacattttcaaacattttttccatgatattttcttctcagccattcacttgacatttctgcttcacggcgggcccgagacc
>Skav210117
AGCCATTTCGGgcaggatgctgatgcagctcggcgtgaggctgaagtcgatgcagctgcagctgcgacgtgctgctgggccctcagaggtggatccggtgccaacctgttagtcccattcccgagagacctcagatgttcgcacatgtaccaagtttgtcggagtttCATTCTGGCTTCAAaactggaaacataccaaattgtcaatcctttgtcggcttgtttatttgtgtttggcaggggtggaatgatgttggactttcattctggttgttgttcgaaaccttccttcgccagcttcgtttggggccaaaactggcaagaaacatgaagctgtgaatcttgtgtggt
>Skav221002
CCGTGCACATTTTGctatcgCCGTGCGCATTTTGctatcgccgtgcatatcttgaagtcagaaaaaaccttgagaaaagcaaacaacaaaaaaacacaaaaaacacaccccatgtctggaggcttcggcctgaggggatggttcatggggtctgcagttttgttttttttttgatttttcaaggttttgggtctgtgcgtgtgtgtgacttgaattgatttgatttttaacagttactcacagatgcactgatttgcgc
>Skav202231
CGTTTCCATTTGGCGCAAGtcatgcagacaacacttaggtggaatggggcctcaagaacgaggcaacagtacaaggttctatcgactctgccatagcaaagaaattctccgactacacttcacgaagatttgcacactggaggaggctctactttgagcaaaagtgggcagacattcccaaagcagttgcagcgaagatcagccaagtcccaaactcatacagaaagaagacatctgcgcctttgaaagggcctggaaacggtcactatgatttgccccccttgattgaagatcagctcaagaggcttgggtgttttgaacaaaagctagactgaatggcAGCCATTTTGttgttgtttgttttcggtttcgattttttcgcacatgtagatggcgcaagtgctatttttagatggctgggaggcag
>Skav214998
ATTTTTGCTCAAtgtttgttagttcaccttagcagtatatggatgattaacctgcaaacaatagtgacaactagatgagaatcactatgactatgctacttaatagtagttaactatattgtacttggtaagtgtttatcgacaaacatataattgttcgttcgtgcttcatcactgccaggctttgcgccactggctgtgatcgtttgtagtgatcattcatcggtagcatcaagcgtaatatgaagcaaatgtagccatcaactgacagctatcctcatatggtggtttctcaagtcataggggtacccacaaatcatccagtttatgaaaagtttctagcaataaaatataataaaccaaCCATTTTGGggggagtaaaccaagcattttgggtggttccctatcttgcgaagcctgtgaaagctgg
>Skav206024
GCCATTTGGCTttgagccgCATTTTGGCTgtgccttgacgtgagtttgctcagccatgataagcgtctttgtttgcttcgtttcatttatcattatggtattttgcggcatatcgcagtagtttgttttacattgacatagacaatgttgtttgggtatcgtcgggtatcgttccgtcatgttccaaatgttgaaaaaattttgggatatgttggcatctggtgaaaccaacgtgattttatgttgagatatattggttgacttcgaaatattttgagatgatatgagatacgatggagtgtcaatttattttggcatattctggcatatcatattttggcattttttcagacatctttgcaatatagccaaatcttgcatcttgca
>Skav228232
AGCCGAGTTTTGGATCAAcagaagagcctgtttcagtcttctccgatccgatgttcatgtttttattctcctcttggaagtctgggaatgccatttcactgatttgacagcctccgttttggtgcttctttcttccattgatgcttaaaagtgcaaacttaaacatgcgactgcttggtctgttcttagtttgtcggccgcagtgagAGCAGTCTTGGCTCAgccgaagccccagctttcacgggacgcacttggcaaga
>Skav219303
CCGCAGCCATTgtcattcttggatgtgatcaaagcatcatcctgtttagaaggattggcacaactcgttcatcaggagctttgaagagaagatgctttgcagttcaatcatgttgtcagacaccagactttcttgcAGCCATTTTGagtgcgattttgtttgcaggaaaaatccgacttcagaaagaaatcgcagacatggccaccatttcgcgcagccgttttcagcctaaccaaaatcaggtgtgttccgatgtgcctcgctgctcc
>Skav225643
AGCCATGCTGGCAGAAGatctgccacaggcattgttggcatgcttagtatccatgtctaccaaaggcagtatgtttacattcgtcaccaacatagccataccagttgcgcgtttgatttttgctgttttgtttcatgattcgctagctgggactgtcaaagactggctccttgagcaagcactagaaaatgtctgttccgacagagtggaggccagcaatgagttcacggtagctatgtccagattggtacaagttacaggcaaagatgacctttgggagtcgcacttgttgcaagaggctaaagaccgagtcgatcacaaactcgaacaggttgcatcccttccgcgagagctcaaatcgcttgaaggaGTAGCCGTTTTcccagcatatttacagctgctgcttatcctcacaggcttggaagaagggaccacagagtcgcagagcaaagccttggcccacttgttgaag
>Skav224957
GTGGCCTATTTTGGtggtggacccatgtccagctccgtaacattgttctttgggaaatccatgacatggtggtggtatcctatacaatatgatatatgggtgtttctcaaaatagggatacccccaaatcatccactattaaccatttattaaccatttatactaataaacTAGCCATTTTttggggctccctatggcttgagaaaccaccatatgattagttgccttgctttggcaacactgcctcaccagccaagtcatgttgtattgttgcccagcgtatggcggatgaccctgctagcttttatcagtgttggtgacggtggt
>Skav216523
CCGTAACCATTaattatcaaccatcagtggccatcattaggcaccattcaccatcatttcgtgtggtcacaggatttttacacataattcaccatCCGTAACCATTattcaccatcatgaaggtcagcaggatttttgcactgccatttcgtgtccgcttcgctgcatcaggcagtggggcacgcttcgcttcgatagcgggggcccatgctcagcctgaccccgctgccggtccccgcaaggtgacccacgacgaagctaaggttatttcatcagcttcagccgtcattaagcaatgaataacatggcgatgggtcaatattaaccaaccaactaataggggataataaccgttttgacctggtggactcgccatcccaatggttgtcgtttttcaccaaacaggcctgggcc
>Skav220785
CCGTTCCAGTGTGGCTCctaaacagtttgtgtcgccagttgtgccattgattggcttcgcagaatcatatggcaatcatgaatatatcgatagcgaccagcaacgagagaaagtacatcgaggtcatttcagcgataggattgtcagatagtcacccttgaggactatttcaaccttggtctcacattccagcagctggaacagcaTTTCGCTCAAGccaaatggctttgaaagtagactttgccttggcaatgaaatgcagttgccaccaggcaccatcgtggacttggtggggcacaagtg
>Skav201477
TAGCATTTTGGCgtgcttgaggtatctcatggtatctccatgcccccaacgagcaaacaaagccatattgcaatgaagccctgaTTTGGCTCAAGctttgcagggctgccatacttgtactcagagatttcggacaagtaacggtcagttgttcaaatgaacgatggttaccttggtctcttctgggcgttgctggag
>Skav231086
CGTCGCCAATTTGGaggcatgcaaattagcagaatgctggtggaaccagacccacatcaaggcggaagctgctgcggcatggggaggacgggcagaagcagtccaactgcactggagacacaaaaggggatacgcagtatcaaatcggatggctttagcttcagttttatccagggggagagttgaagcatctagttggttcaagcgttttcatgcttacatccatcatcagtcctcatccaacgttggtgtcaatacgcgtgaactgtggctagagccgtattaatcattagtatgtagctatcactttcagacacattgattgccatgagctgcgacttctcacttattctctatggttcttccatttcgctCATTTTGGCTCAAGagactaagtacactttgactgcgttacatccatagggtcaaacctgtttttgccacc
>Skav205004
AGCCATTTTGGCggcttatggaactgaccctgtcgagtctcctgtagaaattgtagattccccagaggcaagccagagctcgtccacagagagcgcggcagatttgctggagaaaccagtagcggagggcagagaccaggctgtcaacgttgcgagcAGCAACTTTGACGCAAGtgccggttgc
>Skav219676
CCATTTTGGTTCtcaatcgttggggatacgtccttgtctcagcaaggccgcagctcctcatcagatttcaatcaggcgcattgggtgagtgacctgaagtccgatcctgattaatgGTAGCCATTggcaaggatgcagcattatgaacaccacggtgcatgctcaatagtggttgacaaatcatagcggtcaatcatgatgacaccaatgcatcgctgataattgcttattactattgataacagtgagtaaaggggtggaagacattggataatcaatctgaattttgatggcctgatctgatcaagaatggacggatcaattatcctgtccgataatgataagtggcatacaatgaataacagacaacgtgcttgggagaccgttcatgatgatgaaattggatagcactcgaaaaatgatggattgtatggagaacaatcggcccattgtc
>Skav203615
GTTGACATGTTGGGTCAAaatctctaaattgttgtcggttggttcaagtgctcttcaaaatcgcatcatggccgttgttgatatgagtttatagtccctattcgttggcagttcgaatagggttgcgtgtggcgttatgcggtgcttttttttgatcatgaataggtcccgaggactgccaaaacgaatgcagaaacaacattgaagttgacaccagaccaggtttggttgccacacctgagtatcccatgaagtacgatacgtaggctttggctatcagctatcagctatcggtcattgtcaatcactacgaaccactattggCCGTAGCCCTCTGTTGCTCAAGcagagtcggtgcctcccaggggtggggctggatttacaaaccgaaggccgaacgattgttgcc
>Skav216095
CCGAAGGCATCTTGGgacgCATTTCTGGCTCAAGtgtgggtgcgtttggactgtttagactgcaaaggctgaacc
>Skav235705
TTTGGATCAAGctgtagcaaactcgtctgtagcgccgtcgccatccttgttgaaaggcatgtcCCGTAAGCCCATTGTTGGaggcaactggaagtgcaaccctgccaagttggcagacgccaaagcactggtagaagcctggaaggagaaaggttttgacaaggacaaggtggacgtggtgattgctccaacagctttgcacctgggtcatgttaaggctcctttggaggccttgggc
>Skav200763
TAGACATTTTGtgttttccctggtattaaaagacatggtcggttgattgactgatattattcttcatgatggctctGTAGCCATTTTGGCCAAagcctttggagggacgcagccagccactaccgttgtgtcagatttgccggactcaccagggatgatgcagagactcatcatcgtcgctttcaccatcttgcaggtgcagtctgtcgtggacagcaacggaactgcgaatgaaacaaggagcggcctgaaattcaaaaggcttgtcacacccggaggcccagtgaccatcctccatgtgagtgacacccacagtttgcactggtcagtgggtgatcttccttcagcggatatcttcatccactctggtgatgtttccaccattgggagtgatggggaagtcggagacttcaacaactggttgggatctctgaagggaaaataccgtgaa
>Skav227113
TTTGGCTCAgcaactttgctgggagctctgccgggcctgtctCCATGTTGGGCTCGAGttcgcaactccaaacattgagggaccaacatgaggcaaaggttgcgaagggaaatcgagctttg
>Skav210717
CGTATCCCATTCTGGCTCttgaaatggagagagatttggagctatcaggagtgttcgttcaccaaatagtagatgatagtggtcattgtccaaggcctatccccagtcactgttgtaggtggtttccctattgataagcgaacagctggatggtgatggtgccaccatggacaaagccttctggatcatggtagaccactctgcccacacctgcttggtgttgcccgtgactcttgccaaagagaaccaagagtCCGTTGGAATTATTGGCGCAccgttcaacagcaaagtcatatcaaccagagctactccaattgtacggtaccactatttgccacctatcatttttgggcgtcgccactctttcaaacgactcgaactttttgagctttcagcgcaatGTAGCCATTTTGAGCCTCAAattcagctgctcgcg
>Skav200267
TTTTGGCTAAAcattgtgagttctacatatggttcgctattgcaattctttattgaactggtaaacacataataactaatttaatcagtattcatcaaaacaagccattcttgacgatatcgccagcgaccaccataaaccatcaattcgcagttcttaatcatgaatcattgtcaaccattattgaatcacaaaaaaatccaatcatccagtcacttcagcttcccatcattgaccaccaccaaCCATGTTGGCTCAAGttcatttttcctgcaattttctgtgcacagttagcc
>Skav218665
CATTTTGGCGCActcgcactctcatctttctcacatctcttctgtctcacatctgcataggcgatctaccctagctgagttgtccatattgtcggaagttagacttctaaacttccttcgacaacaccattatgAGCCATGATTGGCTCttcttaaccattatcaagcccgtcatctgtgtaacctgatctaaAGCCACTTTGCCTggctggctgggttcgtggctgcttttctctcatgag
>Skav213950
GTAGCCATTataaatcatgatttgtcctcattgtcatgaatccatcagaatagcagtgttcagcagtggttcaccattcttcgccttgaaccattattggtgcttgatcaaacatggtttgtgacactgcttggatgttcagcatcacagcggagtgcaacaagtggctactggactcatcaaacttccgcttgttcggagtcaaagggcaacaagcgtacaaacacacatggcttgttggtaacaatggctgatagttaagccatgttcgactatggctaatgcatggctaagccacgatcaaagcacggctaagccatggtgaatgacgggcaatcaactggctgacggttgatagttcgttggtgatgaggctctgaaaaAGGCATCTGGCTCAAaccgagggtgtgatcagcagcttctccggtgatttctgcagca
>Skav218966
CATTGAGGCTCAAatggtttgcggtctacctgtttagcttagttggttcatcatttgtgggctcCCCTAACCATTTGAATAGCTCAAGggtacaaacacggagagccccaaactccacatcagccaatctcactgggatgccaggggtggctgcccgcctttcttgcctttcgccagttcatccttggtgtcctgctgtccacccctagtcttgggagatgggtgatggtaatgtcgatcaaagtc
>Skav214771
TTTGGGCTCAAGcatctcagacctcagactcgaagaaaaagttttcagggagaaactggaggtcacatgtgtcaatttgacatcatGTATCACAATTTGACCCAAGtatgctcattgtacctctaggtatttgtacacattttgtgaggcgcccccgcgtgactttgagagcgctgca
>Skav220042
CCATAGCCATTTctatggacgtttttgttgaggaaaTTCGGCTCAAGtacttccctagccttgcagcc
>Skav236381
GCCATGTTGGCcaactgatggccatgttggccgactGCCATGTTGGCCAA
>Skav227184
GTTGCAATTTTGCCTCggactgctttcctttgccgcacaatgatatgttaacccaattcagattgacatagcaacgatgctgcacaaatcacttgactcatagaacaattgtttgctggaccagcgcaAGCCTTTTGTGCTCAActttcctctgcgaacagcgcaacacatttgtcattcacg
>Skav230636
GTATCCATTTTtaatggttaataatagggggtaggaaccaactgagtggctgcagtgggtgatgaacaagggaaaaattgccaatagtaTTGGCTCAAGgtgaacagaaccttctcgattccggcttggcgatcccccacgccttttgcacaccatgtagcc
>Skav232104
CATTTTGGCagttccaggaacagatgaagcagcctggaggtggctgatttgagaagtcttcgaacccttttttcaggcttcaaaagtgaggccgccccagaaaccatggggtttaagtttaaccttcggcaggactgtggcagggccgaaaaatgatttcgttttcatgcttcacaaaatgcggcaagtctccttttcaatcctctctgagtcgtggtgagctgtcatgggtttcattgcttttgaaacagcgcacgaaatggccacagctgctccacgttgcatggatcattgcggtctttgcaagtggcaaaacattgagtggtttagtggtttcgttcttccagcgcggcagTGGCTCAAGactcgaaggtttgcctgtgcatttcccttcttcggc
>Skav222600
TTTTGGCTAAGagcttgggggaaacgtcagtacaccggaaggtggaaggtacaccccaaaagaaactttcgaagccacacacgggctcactccggtctagtctaggtgaccgtgtgagggggagcttgtgtgtgtggatgtgcacgaaatcgagaagtgtaccaagtcttctcaaagcggaatgcaccgctaacgTTTGGCTCAAGaaaaaaggagctgctgcgctttccgtggtggctaccagccactgtgttgccccgggggtcccgttttaccccacgagggtatatcccctatggtcgttggttataatcacacatgattgttcattgtcaaaagctatgaccagtttgaacacccatatgg
>Skav218863
TAGCCATGTTGaagccaagttcagtcatgaaatgggatttgcagtgacgggttgcatcctaactcgtcaggtggatgcccaagtcctgaagcaaaggacacaaaatacaagtcccgggggagtcccaggtcattgtttcatttctgggttatattcttgaaatccgaaagctgattcatcacctagtcaaaCCATATCGGCTCAAGccatgccaaactttcatttgtagatttgccttactgttgcatcttatgttgaggctgcaacctttccagttgctggtggctggcctgatcgcgacgggtggatttgtgttaactccaaagctgagacaacggatccaccacgagcacgccagaacc
>Skav226502
CGTATCCTTTCTGCTCAgcaatgctcagtgcaaatgtgtttctccaagagctgtgccacattgaatggcatcccgccatggtgttttcctcacgtgtctCGTTTCCATTTTTGCcctgggtactggagcaagttaccagccaatacct
>Skav225964
CCGTAACCATTggcaacccgtcagcaccgttgaatctgcacttcTTTGGCTCAggaggcataggagcagaacccgcgcgcctgacaacccgac
>Skav236059
TTGTGGCTCAAGacctcggcgtaagaactgAGCGATTTTCGCTgtcctaag
>Skav229224
TTTGGGCTCAAGtctcggcacggcttggaactagacatgaagttggttcgaaaaccagcagcctcaCGTAGCCATGTGCGCACAgtcaaagtgaagggacatccaggttcgcagaagagaagatctcggggcacaaaggcagagcccacttgccagatttgtggcaaaagaaatcactacagtagcagttgtccaaccttggctcagaaactgctgcaagcggtccgtcggcatgcgaacactggacagatcaagcagttcttagaaaagaatgtcgctgcacaagtggtggctatgacgcagaagcctcgcaagactctgaaaagacggagtgccggcaaagcgtggtacaaaactggtgccaatgtgcagaagaaaaagacacgaaagaccatcagcaagaagagaaatgcagaagcagaacat
>Skav220428
GCCAATTTAGGCCAAGttggggatgttcaacaccattggggacactggattggaaacatcagaagctcaacaaattggatcggcacacggaagggaaacgtcgctttggcagttgaacacatagccacaTAGCACACTTGCGGCTCAAagtacctgctcgcttcaaaccaccgtcagttcaggaccaaaggactttttgc
>Skav203830
AGCCAAGCTGGCTGAAGaccgacttctttatgcccggcattttttccgtgtggcgcCCGTTTTTGCTCAggaaattgtccattctgaggcaaagcattgtgcgactgcctggattaaaggccttcaagcagacgttgaatggttggcttccttgaccgcgcagatccccccgggttttgcgcaggacttgggccctctttttgagcaatggcaagatgaccacagaccttgcatgctctcttggaagagtctggtccggggagctcaccggcttcaccttcaacaagaacggatgatgaatgctgttcattgtcttcaaggacgattctaccatattcttcgttctgcgggggccaccttcaatggggatgcctcaactgatgtcggtgaacctggtctccatacttgtgattgtggggctacctttttgagtggccaggcattagcaaaccaccgacgccgcatcc
>Skav221222
ATTTTGGCTgtcgCCCTAGCAATTTTcttcattcctgtgtggcttatcttgtttatcacagatgcagctggaacctgcaggagccagaccaggatgctttgcctgcgctgaacctcctgagtgctggaccacaggctggctatcggaggttgacacatggatctgacacaaaatgcagtatcttgcacacaaggaggagaaacaactaagaatacatgaacccgaagaaattcaatagataggaatcttcttatggcttgttgacatgaggagttgcgaagtgtggccgaagagttcttggaacctcgaaccccacagctgacacctctgcactcactggagcaggccataagtttccatgtgcggtacacttgaaatcactgtgaagagatgtgaaagcgccacatgggtggacataagagatgcgatttgagatattttgagatatttgagtctctcccttactgtaggtcaactcctgg
>Skav206196
AGCCAATTTGGGTCcttctgccactgtgcaagtacggtcttcccatgatttctccacacgttgctcttggagctgcgcccagCCGCACGCTCTTTTTGGGCACAAGccagccagtcatcacagagcttgagtcaagatttcggcccc
>Skav219985
TGGCTCAAGagactagcaatttgattgtagtgtgatttatattttgcccatccagctttgaattgcagatgtaCCGTGCCAATTGGTGCTTCAAtcttgtaccatgcttgccctgtgcaacgcttttagggcaacctgatgatgggaaaacagttgaacgccccagcaaagaaatgcttcaagttaccgtgtcgcttgcaagtggcaagagtgaaacactgtcaatcccacgcatctccaccgtgagggacttgaaagtgctggccaagaagtcgtttggacaggggttcctccagcttgtcacacaagagggacgtgtgctgaccgacgtcatgaactctttgaaagcgtcggatattcaagacggggatcacttgatggcagttgtccaagagccaaaagtagtggcaacaaaaagtgagtttgca
>Skav219261
GTAGCCATTTTaaagaattttcttgaacaattggttttgatcaagggtgccatggggtacccttaccatttactatatCGTAGCCATTTccattggtcatctcctgttcgaCGTAGCCACGTGCTCAAGggatcagtaggccctcggcgccggctgccgctgcaacaggctgggagctatcgatgatgttctcgatctttccttcagtcacatcttaccttcaacgaggggtgttcctttgggcatcccattcaaaactcaactgcagatcctgtccttcatgctgagtgccagtgctgtgtttggcaagaggtcatcacggaaatgcattcgattcatgatgattagttgatggtttctttactaacgtcttttagtggtggagagtgatgggtaacatgctgcagtgcctgcttccagagttgcgcgccgcagctgttgtccagctgagaccggctgccgcggcgcc
>Skav204398
TTGGCTCAAGtgtcctttggaggtcgtttgttgcgcaccattggctgggtctacgaatgcgcggcggatcaatttatgatcagctgctgggggaatttcacggtggatgggcaactccagagttggaaggtgcgacaaaaaagtgacagttgacacagcttttcaatctgatgaaatatgatttaagtatgagtgaagtacaaagttaagtataagttgagtataaagtgaagtcttcattaagtgtttggttttagtgcttgactatgatttgaatattgctgtaccagctgtggcaggatggctatcacggagcagaggtgaagttcaaagccatgtcctCCGTAGCCAggagcggctatgcagtcaaagag
>Skav210416
TTTTGGGTCAAGggaagctggCCGTTGTCACAGTTTTGGCTAAGcattcaccattgcattggtaaactcttcttgaccacaatagtattcagttgtccattagtgctgatcatgattgctattggtgaagtgcacaggcagatcttgacctacaaccccaatggagcgatcgaagtgagtagttggttgcgtggtgggtgggttggtgtcttggttagtgggctagtggttcgctatcttggttgatttgttggttgtcatgcagatacccagctgggtgtttctcaaaatagtggactccaataatgattaagattggaagggggtcccctatgacttgggaaacagcatttgttgggcagggattcttggagacacgggaacacaactagatggcaagctgcttgcgaccggccccgcc
>Skav227581
TATCGATTTTGGCaaaaattcagccgtgatttgtagtgaaatcagccgtgattggtggagaaaagccgcgacattgaaaatagcatcaaaatccaacgacacatggtggttctcattcctgattttcaattatagaacccactctgcgcagttgttctgagaaccactgcaggtgttcacacaatcagccgtgaaatgtgtggttcagccgtgaaatcgatcagccatagaatatagcagtcagccgtgatttgtagcgggtttccaaccaggcattgtcgaagaaatcatccattgtattttgttctagtggatactatgtgctaacttatccagcgatgtggtggcatgtcgatggctaccttctgaatccttcttccattcctggagtcgctttcgcttctatcaagtgatcttgctggtacctacttcaaggATTTTGCTCAAaccagcgcttgggacatccttcagggaaaca
>Skav225985
CATTTTGGCcatcagtggatcaccatttctactggtgattagccctcataggtgatccactcatcaccaccaacggatatcagccggggcgcacccttgcgaattctccaaacttcgcttcggcggaagagctGCCCTTTTGGCCCAAagtccggtagaccagtcgtgctttccccttagtctccttagtcacttggttgcagctggtaggtgtggagtcgctgataggtgcccccctgagacctacagcagctggtagcttcatctcgctggggaatgttgccaagtacagtgtttcagccagtcaattaaggatataaaggcaacttttcaccaacttttgacttaccaaagttgtgatgttgatcacccgagatgccatgactttcgttcacgtgcaccacgcagggcatcgcttgg
>Skav214618
ATTTTGGCTtcagccttggactttgaccctccataaagtggacgggtgtccatgggttagccacagaacttaattcgcagcaggcgcatcagggttgaaagctgtcgaaaagaaatatatcttttgaacttgagaacgtgaagttccacaatccatttgtgcagtgattctgttgtatcttgccttgaagccgctggaacgagctgttatggttcggaaccgagagcattctgaaacaaccttgctacgtacaagccccacacaaacttttcaatcggtttccttcaaacaaatccaaagatactcttgggtgcaaatgggtgttggattactacagtgcacgtatttaacgtattaacatttaagttgacattcaatgataagatgttagtcaatctatatcgttctacatcatatggattcgcaccgaattttaggaccataggatgaaggggtttttcacttcagctctgGTAGCCCTTTAGGCTTAAGgtga
>Skav216648
CCATTTTTGCTCAgctctccaacaccgtaaagtctttgcggttgccagatgccgctgcgtcacaagctctgcatgtcactctgccgttgcatctccaaggcagaaggagcgacaagatctttcagcggacgctcgtagcgaacctgtgaagcctttgtatcgaccggttgttggttttgtgctccagggatttctgtggagaatttgtagagattgaatgactgcgggctatgaactctatgagcccacatgctttattccccatctcaaggaaacatagaagctgagggattgccatgtatggtctagtgaccctttggctcaAGCCATTTTAGCTtttcacttgattgtgttggtcagcggcagtccaaaagagcacgg
>Skav215733
CCATGATTGGCTCAggcggctctcagaggatgaacaagttccatgacagatgaaaaatggatcgcagttggctgaaccacagCAGTTTGGCCCAAGccaaaactcgtcgtttgtcaaagccaccgacgtttgatg
>Skav204323
TAGCATTTCGGATCAtttcccacattttctcaggttgagatgaggaaatcatggaaaatcgtttgGCCACTGTGCTCAAGtttttattttccaacgccgccacaagtgcggagagcctttcagttttggccgtgccgtcagtggcaccg
>Skav201636
GCCTTTTCTGGCTCAttccgactttcaacgaaacctttctcaatggctacgtaagttcatCATTTTGCACAAGgaacatgccattcctcttcatcttcccactcatcatgttcgtgaaaaagcgtttgcttcattgaaggacctcttacacaatcaccgacggtttgaacgttttcatgatgtcagtgatccatcccggttgccatgttgctgcagtcttctccgacccatgttacattctcctgcggattgtcaatttggagaccatcttgtggctacgttggaacagatcaagttgccccaacacctttcaatgtttcatcaggccaatgcaggttccacttacttc
>Skav218152
TAGAAATTTTGGCTCAcacatgaattcgaagagaaacattgaggaaaaatcggacaaggcatgagtttgtcgagtaattattggcttgcatccacaattcaagcagtccccgtagtgggctttgatggtgaattttcaactgtttgtaaaatgaattcaagttatgctcattgttccatagcgctcagaactaaaaccccacgggacgatccttcaaaagatgcatccgttttgatcaattgacggaccagtgtggagtacaagaacgtgatgatcaatgattctgaatgcgttggcatttttttgATATTGGCTCAAGccatcctgccagcacccggttttgcatcaagc
>Skav223803
CCGTGGCCTTCTTGTGCTtctcctcgtctcatccatcctctacttttcaaccataccgtttttctaaccgcaagttctttcattttctctagagacagctgcagaacggaccccccaacatgtcagacttggctCATCTTGGCTCAAGccggtgggaggtgataccaacacacctcctggaccaccagtgtcattttcatgtggtttccttcgagggggacccttttcgctaccgtacttcttttggtggcctcggagagagaggaagtcgcgacccagtcggccttggcctttcctgccttgcttcggcccgacgtttcaagtgtggagtttcttcagctcggactcgatttgcaacagcttcgacgaaggtcaccagcaggaaacaagagtgacaaatgcctgcgattc
>Skav219268
CCCTTTTGGCTCAAGgactttccgcaggtgcatcagttgcgctgggattctgcccctcaggtgtctagaaatcgatctctttgagccatgtccaaaatccagatgcttcttggagtgcttggatggtgtgttctcacagcagttgggttggcaatggtcttgaacttcggttcaaggatggtacctgcagtgctcctcacaggcaatgtgttgattgcactcgtactcgtcttggttctccgcaagtcgccagagccagaaaccgcaaaaactgcggcccaatctcacctccactggaatcctgacatccaacgtcgcggcattggtgacctcatccgaagtgtgaatcacatcGCCATTATTGTCTCcgatgtgggccgttcattggctttctacaccgagatc
>Skav216929
AGCTATTTTGGATCgatgtctgaggcaagtctttccaaatcaaTAGCTTTTTGTCTCAgcgcaccgagcagcaaagtcgtattgtacgaccaccggacccaacacagcaagcggattgatcatcgaactcaatacccttctatcaaagatcagtcctcacgaatgctgaactctggatgatatcataatatattatatatcagtatatacatacacttcatacactttcaagtgtggcagttccaagcaataaaacttTTTTGGCGCAAatgcctccaacgcgtttcagcaagatccacagaagaggtaactccagcattcaatgtctgttggagacaaacacacaacacacaacacacaacacacacacacacacaacacacgcacatatttttgcactacattgtgatcc
>Skav216671
CCATTTTGGgctggggcacccccacctcaaaataagtgcttgaggaaaatccaaataacttgctgggtacgtttgtggaccaccttggaatctcctgccttgtcatagtgctgatgttgATTTTGTGCTCAAGcaaactgggcgcgctggagcacgcgccttcaaaaag
>Skav213825
CATTTTTTCTCAAtgtttgctcaatctcagttgatagatcatccaatcatttctcacaacatggttttgcatcgaaatgggtttttgggtggtcagctactcagcttcccaaacaatcccacaggtttgaaaaaaaatgccaaacaacccattggacctgtcaaaaacattgaacTTGGCTCAAacttgtagtggctcagtgaccttttgtgttcatcttagccttgtggccgaaacacggtcgtgacaaggct
>Skav213989
TTTTGGCTCAAGtgagaaaaggtcctctgtgaatcttgtaccttgttggctgtggtaacctgttaaatagtaataaatcatttttttgggttccctattttgagaatccccccacatcactaattcagaagattcggcttgggaggcaacgcttctcaacgaagcagtcgatgcaaattgtgccgcccaggttcttccttgggctggagtgtccggaacgatcactttatgcatcttggctgtgaatccatgaggcccaagcacatccgaagtgcaatgattcgGCCAGTTTGGCATCAgaggtggcccatcc
>Skav234266
TAGCCATTTgcaaacagtgagcagtgggcatgacacatcaatttgttgaattgctagccattagaaaatcattcggagccatacctatcaggacttttcgtgatcaatgtcaacatctgaatgtttagactatgaatgattgtggatatgcattacggctttcgccaccactcaaacatttggtcaccgaacaacatagctcgtgatgtatttgtcgcgtagcaagtgcatgcaagttcaatgtggacagatagagatgtgttgctccttttcaacgcagtgatgagtagtcggattttgatatcctcaacggatttgccgtacatagtacatagaacgtgtttcacctcttcatcacaatgcaatgcattcaaaaaAGCCTTTTTCTCTCAAtctatgttcatagtgggcagacaagcaatatgaatagctgctctcgtaggct
>Skav211116
CATGTTGGCTCcgtccctggtcccatgccaggtctcaaactttctatccatgggcttgtcttgggtcttgtcaatcgaacaatttggacaaaacccaggcccattgcattctagggtgagttttttgggcagatcaaactttgattttagcaatttgAGCCATGTTGGacattttaaatacttgaaggtttgctgctgggcctgtgttcaccccgaagccaaatgcaggatgtgagctttactcatcccatcaatcttgggtttacgcggccagaaaccttcagtacatgatttcactgtgcgatgttgtccaatgtccaggtaatacccccaggcagcagaaaggtttttttcttttttcttgcgtttgttcccaggtcttttgctcctttgtctctgtcggacttggccttgcc
>Skav230375
CGCAGCCATATACACTCAAcattctagggctgccttcattttccggtcaCCGCTAGCCATTggag
>Skav212379
CCATAGTTGGCTCAAtttagttagtatcaacattccaactgctttacaatgttttacaattatatgatttcatattacatattgcactatagatcaccatgtcacactatttcagtgtatcgtattaccatcttacaccatgGTAGACCATTTTGtaccatcccatactgtacaccataccacatggttgtttcttaaaaattagggggcccaaatcatccaatatcaatcatcttacgaataaaccaaccatttttggggtagcaccactttaagaaaccaccagattctatcgtaagatcatcatcaactcccatccccc
>Skav217710
GCCATTTTGtgtagcactttcaCCACTTTGGCTagcctacctttcgaccatccaggagcacacaaccatcaaaacacagagcactttggcttcatttctatttgtcatgcatttcttcgtctataacatctctttttggggcctacctcccacaactttccatcagttggacattcaacttccaaacttccttcgattaagcatggctgatcatcaccaaccaccatcaaccatcataacccacgatcaaccatcatcaaccatcatcaaccatcatcagccaccatcaaccatcatcaaccagcatcagccatcataaaccatcatcaaccatcatccaccatcaccaacccgcagaagccaaaacaatgactacctcacagggcttttttttgatcaacccttccaaggca
>Skav227739
CCATGGCCATTTTatcaccaaaaaccagtcctccacccatttttggctcaAGCCATTTTGCTCAccgcccggtagtttcgctccgtcagcacagatttaatgatcgctgccgcaataaagccacactctctgctcatcttcggccttttatgtttgatgctgcaaggctgtgaagaagaacagacaacaagcgaaccgcgccaaccacccaaaggtgtaggtgtggatgttttttcatgggttgaaaagagaggatgccctgtatatacaaccaattgggctacgtacttccctttggacgtatgcctttgtgcccctgagccctgttgtctagtgtgtgag
>Skav217118
TGGCTCAAGcacagcagaaccttacagtctctcttggttaagcaAGACATTTTGGCgaggcatacccgagccacggcaagcgtgggagaaaggcatgagcgcggcatcaccagagaccttttttggcagcaaagagtacttccaaggagcccggctgaatgcgcagggctacacatacgtagatgccttgaccatcgaacacgatgccactggcatcaaa
>Skav236498
CCATTTTGGaactctgtttttccctttgagagggagctatgttctcttttcgaatgtctctattctcatctgttccttgattctatcaattctcatctattctcatctattttctctattttctcatctattctatcattctctaatctttcggtcgttctctGTTGCCATTTTGGtgctgaggataaagcgggtaccggcgcacctgctgtgcttggaattcacaatgctggcattggcttgttgcacgagggc
>Skav200480
GTATGCCATTTTGtccgccgctgtctaccttttcccctaacgtcccccCCTTAGCCTTTTGcttatctgtttgagacccactcctcccattgagacaagaatttcaatttggcattgcactttagcactgcttaagtactgcttacctctcaaatttcagcattgcagcgctctcagcacaacctccacagcgcccgacgaggcc
>Skav210235
AGCCACTTTGGaatcacagtttagctggatttgttttcctgtgcaggcagtgattctgaaccaaaggcagctggcattcatcgtgatcaattcgctcatgggcaatcatttggtgggagaacacacaggcaggacccagaaactcgaactcgtcacctgccaatccgacgccagagatccaatggcttcgctttcccaatttttgtcgtgccagtaactgtgcggatttgacatttgaAGACATTTGGGCTCAAGacattgccactcctgccttgatagcagccgcgatggctcca
>Skav217406
AGCCATGGAGGCTCAtgattcagcttttggaacagtttggtttgatcatttttagatctggaacctgtgagatgaggagtttccagtactcatttcagttggtctgcttggagaggagcttgacagttctcaaagtatgtcccaatgagcctagttcactattccctttgctgctactgtagttacatgtagttgctggcttgctgagtcacagattacacgacacaacaaccatagatctggaagatgatggaaagtcctgattgatgcagctccctagcactagcattggctgtccacaagtaccctcagaatcaacgagacatgatcatgttTTTTGTCTCAAGggacgatccttgtgcaccatgtatggacacctgggctccaagatgtttgttgatctctaccccatgatgacacg
>Skav217133
GCCATTTTTGATCcactttgatgcccgacagagttcccttcaagTTTTGGCTCAgacacaccaggcgcttgcacaccccacggcgcacagagaacggatcagccacc
>Skav202016
GCCACTTGGGCTCAAGTTTTGGCTCAggTTTTGGCTCAccatcaggggggggcc
>Skav207181
AGCCATTCTGAATCAcagaaaagactgagcatgaacgaacgtgcactcagaAGCCATTCTGAATCAcagaaaagaccgagcaccaacatgcaacaaccacatcgatcggttggagcttcaggtcaaagatgtcgtgtgctgtggcagtggctgctgccggcctcgttcttttgaatggtgtcggttttgtggctcccnnnnnnnnnnnnnnnnnnnnnnnnnnnnnnnnnnnnnnnnnnnnnnnnnnnnnnnnnnnnnnnnnnnnnnnnnnnnnnnnnnnnnnnnnnnnnnnnnnnnnnnnnnnnnnnnnnnnnnnnnnnnnnnnnnnnnnnnnnnnnnnnnnnnnnnnngtgggatgagtgtgctggttgagttcttcatgcaggactttttcccagtccgagactgcgccc
>Skav206764
TGGCTCAAGaaaccatcattttgaccatgagtcctatcagcgaTAGCCATTTTCGCcatcctccaaaacaggagccatcctgcctatcaccagggaacaaccagggaataaccagggatatctcagtaccaccctgccttgctcctcaacgcc
>Skav212473
GCTATTTGGTGCTCAAGgtgagatacgtggacatacacagaccttggcacgaccgatgacgcttcgaaaaagtgatggaaacggtgaacacgtgtaagatggtcaaagggtgaacaatgaacagctgtgaacagctgtgacaagcaaagatgttgtggcactaagatgcgctatggctttttcaaggcctttagtacagcctttaaaaggcatctttttttcagcaaatttccctggctttcactctgcgacgctctccgaaggaaatcgTTTTGCTCAAGgcccagctgggcagc
>Skav227116
TTTGGCTCAgtaactctcctgggagctctgccgggcctgtctCCATGTTGGGCTCGAGttcgcaactccaaacattgagggaccaagatgaggcaaaggttgcgaagggaaatcgaactttg
>Skav204849
GTAGTGATGTTGGGTCGAAGattgcagacatttgcaggctgtggaccaggttgcgaatcgagacagagacagaaacagatgcagtgcccaagtggctttgcgtcgaaggtgttactctCGCAGCCTCTTGGCTCggctcaaatgcgaagcacaggaacgctgttgttgcaatagtttgccaacacggctcaaagctctttcatcacattccggcacgactaggtaccgtatatttggccacttgtatttgggactttgggaattcacacctccaaaagcagcatgttgccgtgccgatacatcggccattgttccgccgtttgaggcacacgtcgccatggaggagaagttgatatcgccattggcaatccgattttctgtggaacatatcccaaccagctgtcgcaatggg
>Skav206166
GTAACCATTTTGCCTtgggacatctgaaaggtagatttgaaaagatccagactatccaaagactatacacagtccatccaccgactatgcatgacttccaaattgttcagttcggcatagttgagaaTTTGGCTCAgcacagcatgtgagaagattgacctggccaaaatggtggcaaggcc
>Skav204364
CATTTTGTCTCAAatttgtttgcacaaaaatccaaatttggatggatgatcagttttcaattctacgggctatcaaATTCTTGGCTCAAGccctgggtgacttagtgtctttgctcatctttgctctcgcgctttgcctgtctcccgacc
>Skav226654
AGCCATATTGGtaaattaatcatatgggtgtttctcaaaataggggtacccccaaatcatccattagtagtgattattattaataaaccatccattcttgggtgcccctattttgagaaaccaccatatggtaaatgaatcatatcccaaaaagtctaaaaaacttatggtagtaatggctacccaggatgaagctaaacccctggttgattaactagggggtatcccctaaaagcttccctttaaaatggtaacccccctaggtagccatcaaccaggggtttagcttcatcctggGTAGCCATTagccttttagccacggtgagctacccggacacgaggccgcgccc
>Skav218081
CCCTAGACATTTTctttgtaccattagcagctccaggtgaacttgattttctatcctggtgaacatttccaatataaaatcaaggcccgggccccaatttaaacgagcccctttgcagtgGTAGACCAATTTGGGTAAGattctcaggatctcaattcgaaaaatgtttcaaaaccaaaacaccggttttgatacgtcttgattctataggcttgactggagtcaggaaccacgtgttgaaacaacctcgttcgcatgatcag
>Skav231647
AGACATTTGGCTCAgctttgacatgagttctcagcgcttggagttgcattcggaaccatgacttgtccatcaattcacacccatcagagagactgacaatcaaaaaagtatggagaataatgggaacaactatttgataaccattaattcgccactatcgaatagttgaactccctccaatgtccttgagacgacttgcatcgtcttggcgcccggtagtggctgcaggggtcaccactgtagctgcctgggcacagcctgatagaccgaagtgcttggctggaccatttcaacggccggtggcatgtgagttgcgcagggacctaaaccaaGTAGCCATTcgtgaacgattcgacaagatatcttcgtactgtgagtttctgaagggaatttcacctagagcagaggagctggaagcaattcgctcagacttgtcgatttccaaagaggattttgacaagccgccg
>Skav208557
GTATCCATTTTtgtgggtcccctattttgagaaaccacccgaattctgctcaggatggagccaccggagagacggctccggtgctggcagcgattttgtcatcgctggagacttcggagaagctgggtctcaatcatcccaatggtcatcggcgatggcatgcTTTGGCACAAGaactggaaccttggaccttgacttggatctgacttggtagaaaagagattgaaattaattgtgatagaaaatttatttctggcaccagttcgatcggtttgtggcacctccagaaagaacgaaaaacattctcgcaaacagatagaaatggtcgataggaaaatatacgtttcggagtctttgttttaatcactatttttatggggggtcacgggttttctgcagatcttcctgtgaaccaatccactgaaacgtaggggtgaattcagcaaatgacacaccaactgatcacgggg
>Skav212764
CCATTTTGGgatttcgcaagttgcagttgtcatctccacgtcgtgcgggaacgctagcttcaacgagaagaatttcactggcattcgcagggagtaacaagctgtaaggatacaagtgacgcagattgacacacatgaaagttattgcgacacaaatgattctttttcgagcttttgcatgtgttcattttttgccttggatatttgagtgcctttccggcagaaaatgaaacgtggAGCCATCTTCGCTtattacagaagtgtcactgagctaccggcgtgctgacgtacagcaagcacttgcagcaagttgaaagtccgagcacttttcgagcacttcctggctcaaagtttctctcaggaggagctatttttcacagaaatgttggtcagttcttgtttttttctcccccttgtagctgctgctgacttctatttctttcggcacccggcctctggatactgc
>Skav233244
CATTTTGGCgatttggattctgggactgcttgatttcaagatgtaattcatgagaggccaacaaaaatgagatctttttcagagcgacctggcccacagtttctgcagatgcgtctcacatttgatctcaggattgctacaagattcgcagtgagttattttcgtgccagctccggcccctgctttgctgtgtcactggcaggcaacaaacagaggcgctgccacagatgATTTTGGATCAttggggaaacggaaagtcatcgaaggagaagattcaagcgaaaaacggcacggagct
>Skav204910
TTTTGGCCAAGagggaaatcatcccaatcttactgtatctaaatcagcccatggagcttgacataggtagcatcaaaacttgtgagggcagtgtgcctgtgagatgcccgatcaatccaaaacaaatgataagacataatgatgggtgaaaccaggcaaaccttttcttttgtgtggttttgacaaaatggttttgataaaatcctttggaaagattgcgcatccccaaaactaattgtgacgcttttgatcgcccaggtccctgctgtgacggctgccaagatacgccggggaactttggaggatgctgggcaactgaagccccatcaacatggctcggagaAGCCATCTTGG
>Skav222914
AGCCTTTTTGTCTgcacaagatgattcatgatagaaaaggacaacggtatataagcgtacacatttacgcaaacatCATTTCAGCTCAAcacgtcggtcgtaacacaactcttagaaaagcacacatgaattgacatattaaattagctagcagggagcactggtgg
>Skav203642
CCATAGCAATTGTGGacaattgcgactactgtatataacaacctttggagcagttgccagttcttgtgagtcgatgccttttctgaacctttttctgaggctgaaacgcccgcgaggctccctgtgagactgcggggccgatcagggtaatctggcagtggatagatggttgatacccttgatacccttacgtatagcgtttcaaatggtctcaatatgcttcaatccaacaaaaaaagttgacaaactgttaaggctatgcgaatcatgccttgataatgattcactagcccaggtgatgcaagattgtgttcatggatggtcatagtacaagcatctatgttcatcgatcggtccactgtttcaagggcacattggcttctgcaaggggttgggggcagttttgaccatcccaaatttgtggtccaccactttgtcggtaaTTTGGCTCCAGcgctgaattgctgcc
>Skav212811
GCCATTTTTTCTGAAttacgcgccctttcttcttgatgcatcttttaagggattttcaagtctgaacgttgaaacattctgcgattgcttgtgatgATCTCGGCTCAAGccagaggaaatcaactgcggatttcgccctctcagtttgtgcatcagattgccgag
>Skav221121
TAGCCATGTTTTGTTTAAagaaatatcgatggaacttcttgtatttgatggcgtcgccgaaggtccatttgtgctgggcgcagtcaaaaacttgtagatcttggcatattgctcatgctgtctggggaaacataggacaagcagccctttggagagtcgtttatatccgaaatggatcaacgaatcaaacatggagtgatttgtaccctgaatggtagctccatttccgacatctcagaaccatggagtggttttgcagacctgttccggatagatatggatcctttcgaggggttgtggcttgacatggaggtactgtttggGTACCAGTTGGCTCAtaggggctttcaacgaagctttgctgcactgaagcacccagcgacaaactaggtcgatgtgatgagctaaagatgtgcttctgatggaagtcacttaggatccgcgtttttggcctttgc
>Skav224188
CCATATTGCGCTCAtggactaacactgacaagtggtgttgatgttttgttttatccctctttagacttcgtgttggttacaatcctgtaggtctatcaatacaccccattgttgttcaatagtcaCATTTCGGCCCAAaacttcccagctagctgacaggcacaacagattgggcgaatttcatggcgttgaaacatgacccccatggggtt
>Skav211642
CCATTTTTTCTCAAGaaattgcgctggaaagccattggttgcttcccaagaatgactggtgccaggtggtttgctgttacgcaccgacagcttcacgaatATTTTGGATCAttttctcgagtctttttatgtataatgctcaagtttgccttttttaatctttttgagttgtggatgtccatcaatgacaaaacgtgtgcatttttaggcaaggaagggtcctccaaagttgggggcacaccatcgacatggcttgcgacaagccacttcttgtgcacccaggccttttttgggacatcaccaagtcgtggcacatcatggctggaggaaatgccatgattgtgggctgatggcctgaaattagaagagTTTGGGCTCAAGttccaacaattgctgattgcagcagc
>Skav219559
AGCCATCTTGGaggaagggagaaaagcattggatcctagatgcaatttgcggcatatcgaaagcaactccagatctcaaagattgcgatgtttagtggtggagaactgctcaagtagtatgagactaatcacaattgagggatcaaaaccatttaggttgctatcaggttttttattacagagctcagtagcagtttggtgtactgtatcctttgtcacattggataatccttttgagaggtgtctagatccgcacaagctgctgaagagtttgcacgagtcaataaattcatacgaattctagttcttcaacacatttggcatttgaaaagacatcgttggtttccttatatatatatatatttatatatatatttctattcaattctcatatttcagttTAGCAATTTTTGCaaatgggcagcacattcttggtgccaaggaacacgaggtcgcggcgctcagttcgcagtgcac
>Skav232545
CGTAGCGCTTCTGGTCAAGaagcttccggtctggaaccgtaccgtgtgaggtctagcgactctagagcagctgggctgcttctaaccaaggcactctgtatataagtcagcgtgatgtaCCTTAGCCATTTcgagccgtttacgattggggttgccgggagaaaaga
>Skav212963
TTTGGCTCAtgtcgagtgttgccgtacctgcagagtgggaagtgcaatgtgaagtctccacggcTTTGGCTCAAagttgttacaatggcatcaattgtcatgtgctttaggtcactttggttgttcgggcgcaagacgtttcaactctgtgcaagctacaggacccactggaagcatacaagaaagacgtggtgtaaatagagttcctaatcaaacggtttggaattcctaatcgaattgcctttgttacccttttgcacttcaacctttcatgcacttgccg
>Skav211230
TAGCCATTTAGGCTaggtgaaaatggctgcggaaaacttgccgtcaggcaggctatttattgtcgtggacggccagctgtcttggcacggactgccggccgcgtgctacttgatggcgggtcacgtttgggtgattgcttccatgggcagaatatttgctgtctcaagtatgcagagctcatcaaagagcccaacctttgtgaggcaacgctggtagggtttgatgcttccttgtgcagagacttaaaccacgccaggtgcgagtcgtgatttggttgtgaaatgtctgcccatcttggccacagaggtcttggatttgttagtaccgagtatttgtaatagttttgtggcttgaacAGCTATTTTGGACCAAGctagttgcagcgtcttttcaccc
>Skav215843
AGCCAAGTTTGCTCAgctggacaaaagatggtcatcccaaagggcagcagagatactgcaggtactctgttcaagtgccaatatgcgaatctgaagtcTTGGCTCAAGtctcttcggtgggtcaatagtttgcaacacctagatttccacc
>Skav216533
CATTTGGGCTAAGtgggaggtgtcaaagagtcctaacagctgtccgcattgtgctttgtaatattttcttgcgacaatggaatagtgcaactcgcaaggagcaagctcctggcaccacaaagctttgcggattggATTTTGGCTCAAacatcgcagtgcattgaggagcccactgcagttccaattttctttgcctctccccaaaggtgagaattggctttccatctttcaaatgctatcgtctgacctctcagtcttcgaccgaatccttccaacacttggtgatggtaccaggctgttgattcttttttgtgttcaaacgcctcccttcctgctgactccagtcttcctggtcaacttcaaacgcttggccaagttctgtcgcagcaggtctccaaaggttgccattgaacagctttcaccagag
>Skav218253
ATTTTGGCTGCAAattgaaaattgagatacgttgtccttttggggcatgccaaggtttcagcgacatcttgtgagtacaGTAGTTATTTGGTTCAAGgccatgtttggacgtccaaagcgggtccaaacacctggctctgtcgtggcagaggtaccattccatgacgggtctgtccagtggtcggcctggatgtttcactggttgttttagccacttctggggtcctgagccggagccatggatgcctggtctccgtgtgctcgcagtcaacgacgtttacaaaccggagaggtttgcaaaggttcgaagcctggcacgaggtctttcaacacctcgaaccaagctggtg
>Skav209854
GTAGGCCATTTTcatattgctcaacaaatgatccagtgcggttaacaagcaataacatgcaataaccgttaccttttgatcaactcaaaccactatgaagcctcatacaaccaatgtgaaccagtgtgaccatgcatgaaccaatttaaCATTTCTGGTCAAGccatgtattactagcagttgaaccaccaccaaccacctcaaaagtcatcaattccggtgtgatctccaggaga
>Skav229146
CCATTTTGGCagcatgcatatgccatcgtacttcgggaagtgttttgggattgctttcctatacggcgcacctgacgccgcatgacgcacctatgcctgttatgccttatgactcttgaggaactgcaatcttcaggaatggtcgctcattcctggtacaactcccttggcacgcaatttcaaaccggcgcagtccgctctctgcgaggaagactcgCCGGAAACAGTTTTGCTCAAcaggaatcagtttccaagtgaagcagggacacaagaggctacaccatggcactcaccctgaatttcatttggccaaacacgttttggtggaattgtcatctggctgtgccccatagcccctcaacatcccccaactcaatgttgacgtctcattggactcggttagccctcacacactgtgagcaccttctgat
>Skav214210
CCATTTTGGacaattttttatttgtcactggctatttagctgatgaatgtagtgtgtcagactgtcagacaatgtatttctgaatgttcgaatcgggcacatggggtcaatcatttgaatccggaaaccgacaaagacttctatgggcaatgaaggcgtgcagtcgaaaactctcagGTTGCCATTTTccaagatggggcggggggggcgcccaccctgaggcacggcg
>Skav231403
AGCCATTTTGGCTCAAGGCCATTTGGGCTCAAGacagtggatgggagatcttnnnnnnnnnnnnnnnnnnnnnnnnnnnnnnnnnnnnnnnnnnnnnnnnnnnnnnnnnnnnnnnnnnnnnnnnnnnnnnnnnnnnnnnnnnnnnnnnnnnnnnnnnnnnnnnnnnnnnnnnnnnnnnnnnnnnnnnnnnnnnnnnnnnnnnnnnnnnnnnnnnnnnnnnnnnnnnnnnnnnnnnnnnnnnnnnnnnnnnnnnnnnnnnnnnnnnnnnnnnnnnnnnnnnnnnnnnnnnnnnnnnnnnnnnnnnnnnnnnnnnnnnnnnnnnnnnnnnnnnnnnnnnnnnnnnnnnnnnnnnnnnnnnnnnnnnnnnnnnngactaagggtcctgaggcaaagcagtaac
>Skav231720
AGCCATATTGGttgatgggtcagcatctgggttcactcctgatcaaccccctgggccgactgggaggcctgcagtactgctgatcacattggaccatccagggtgggggaatggctttgaacgtgggggatacgtgggatactctatttgctccaggatggttataatactcatgaatgtgacctattcttgctgatcgatcctatccatacagaccgggtatgaggggctatctctttcttcatgcaaagaacggttttgtacttgtcaattatcttatcttcagcagcgtctctgcccaatcgttttggactatgactcaaacatcgttcacatgttttggtggtagcactgtgcaatgatccggTGGCTCAAGgaagaggcactcgagagctgttcttgacttgctgttcaaacagcgaaatgggcgcagcatgctctggcgc
>Skav217450
GCCATCTTGGCTgatggaagtgtcgtgacctggggcgtggagccttttggtggtgacagctctgcagtccgggatcagctaaggaacgttcaacaggttcatgccgcaagctttgctttcgctgcgatcttggcaaacggctgtgttgtaacatggggcttggcagagcttggtggtgacagctctgcagtccaggaacagttgaggaacgttcaagagattcgaggctcgacccttgcttttgctGCCATCTTGGCTgatggaagcgtcgtgacctggggc
>Skav211006
CCGTGGGCCATTGTGGCTggttgtagcagaaaggaaagatttcaatacctttcacAGCCATGTTTGGagaattggctcatttggcgaatctgaCCGTTGTCAATTTGGaccctgtcttcataccaccgtgctaaggaccgaaacttgaaaaTTTGGCTCAAGactgggttacgaggttgtatattggatcaaattctgacccaaCCTTTTTGGCCAAtggcaacttccagggatccactgctacaggcagatggggagatgcgctttgattgtgagcctgcgcggaggcacattcacaagcattggctgacgtttgaatcgctccttgtttggacagcccttccggtggttctatcctcagctttaggcggcaccgagtacaactggatggcacgggctgtggtcctc
>Skav214674
GTAGCGATATTTGGaggatggtcttgcaaaagggccaaggcattgaagcttccaacagaacaggtcctgcaaaagggcttaagaccagacaagctgccagaaaaaaaagggaaggaaaggggaaaggaaaaggaaaaagcaaggagaaacaagttgctcctgccaagtggctggcttctccaggctcacacagttgactcttgactttgcagTTGTGGCTCAAagcacagctccttttttttggtttgccttcagtggttttcttgggtcctgtgaaagggcttgctgctgcctccttcagtggctttcttgggtcctgtgaaagggcttcctgctgtcttcattggctttcttgggtcctgtgaaagggcttgctgcaatgtctctg
>Skav204546
TAGCCATTATTGGatattgaactagtatcaaccagtattttggttttgacaattcttaaccactattctgttcattttcgggatcctgtggagcagatagcagcaacggggggactgtgcataccctgcaactttatcaaaaagaaaacctgctgtgtgtaaggcatcctagtacaggaagtatggatcttttcgggtcatgcagtgtaCCGTCGCGCTTTTGGggacacctccagctgcggcctctgggggtaacaacctgaagcc
>Skav227182
AGCCATTGTGGaagtacacggtttacagacaaccccagaccatttcgtttgtcttgctttgtgtcccaatttcctaaggagaagggagacaaggttgagctaaacccgtcaagatgaagatgtcagcgccccggcgacatgagaacagcctgaatcctctctgagcaacacctgagcataacttgctgacttgacaaactgtaaagtttgggttttggtctagcaatgatgctgcacaaatcacttgactcatagaacaattgtttgctggaccagcgcaAGCCTTTTGTGCTCAActttcctctgcgaacagcgcaacacatttgtcattcacg
>Skav234833
CCATTTTCCGGCTCAtccgggagatggtatcagaccaatcttctccatcacccgccagcaaggattatattggattatcatcattttttcgctttcatccgtcgtcatcattcgcatcatgattgcactcccctcatggctggaaacatagcatttgtttaatcccctagctttcttatatccctctcgtgtccccacggttccacaattctggaacacaattggtggatggttggtggaataaggccgtggagtgggtggtgccaaagaagggctggaacaTTTGGCTCAAGctgatcagtgacttagcaatcnnnnnnnnnnnnnnnnnnnnnnnnnnnnnnnnn
>Skav215268
TAGCCATATTTAGCcccaaccagccttaatttcccttcacatcaagccccaatttgcggttttgccctccgagcgtaccagttggggacaccaagttgatgagcctgcggcaggtgctgctaaccacggtgggcgaggccccgctgggtatggccaaccgttattggttcccacttgtggtgcccatgtggtgattgaaaggtggctggatgcgcattggatgtgcattgaagcagtttgagaaagtgtggagggtaaatccctcgttgagatttgagacctgttttgttacccttgaagattagatgatgtgtctatctactgttgaaatcgtaccacctggatatagctgatatctttgatgccgggatttgcctggaATTTTGCTCAAGcaaaatgcccccaattctttgtccttccg
>Skav211897
AGACATTTTGAATCTAGgattagagacaagatcgttactcttggtcatacactgcaacacttggcacgcaagagtgacaaagataacaaaatacctaactgctcacagctttccccgcttccattaacagtttggagatatttcaagagtggaagctacatcaagctactgtGTTGCAATTTTGAGCCAAGctacggtggagccacactctgagccgtggaaac
>Skav220625
CCGAAGCCATTcaatatgagccttgggaagtgctcaggtgcttctgcttgccttttGTAGTCTTTTGGCTtcagtccagagtggtctttcgaattctctcacgttttcatgtcatgatgcacc
>Skav211537
ATTTTGGCCAActatggaccatgaaccatgactgaccctttttcacctgcatcaacaatgatcaacaatcaactgaccattagtaaccacgattcaccaccattgaccatgattagtcagcgtgaaccgtcatcaaccaccattccagggatgaacaatcattacagcccctattgaaaaccgttgatttccatcattagagtccttcttcttactggttattaaccaccaaccatggcaatgggactgcaagtggtgcctCCGCAGCCTTTTTtttctgcccgcagcttccatcgctccccgaagcaaccgctttctgcacagcaac
>Skav215650
CCGTGTCCAAGTCTTGGCTAAAGgccgtgcgtatcttggtttgagaaagctgaatcgttggcttatacttgtcgtttttaactgtggagaatttattccaatggttacaatggttgattccaaaggttttaagtgttccaactctgaagatttgattgccatggttgtcttaaactgttcagtgcaactgtcatatacgctactatcaatatgatgagcttatgttcatgcaaaaaaaatgcaaatcaatgaagtcaatggacacatcagtttgggcccaggattttcaagtcAGCCGTTTTGGtgtggattttctacgaacacgcacacattctcggcaatgcctatccccggaggctccggtggttcattttgttccaacataccatctatttccaattaccagcggtataggaaaccatttctcaatgcccaacagtttcggtgggaaacctttcccctgagatccttctgaaagtgctaggcgcgttcgaaacg
>Skav226086
CCATATTGGATCAtaaagctatgtatttgttttttgaaacaatgtgtaatgattgatttttttttatgaatttttgtattcttgttttttttgcttgcaatggcttttttgaatatttgtatggatcaaattggtttttctttattggctctgaATTTTGGCTCGAGggttccgagaatcataccagcagctgaaagccacagtcgttaattttcgacgtcgacagcttcgattatcttcgctgtcgaaactcaac
>Skav213141
CCATAGCCCTATTGTTCCCAAGaagaggcatttcatcaaatcctttgcgcagccaaggccagtgaaccggcctgagagtctgcagcaagagtactgcaagcagcatgtggcaaggttcaaaaaactgaagttacaaccgccctcgccggttggatgtgTTTTGGCTCAgtgactttggttcttcaagaaattcaagaaatgtaaccactactgtggatgttccaagtaaactgcatgtgctgcatgcTTTGGCTCAAGgttgagccaaacaaagacatggcgcccggaacaagggtcaacttgccgtggtcggttcaaagaggtgccgggctcttctggatacgctggatacatcgatgggggaatctccattcgaacccacctgttagtttgatggtgttggtgctgtttttttcaggtttcttggccattgggctggggg
>Skav204694
ATTTTGGCTgagcatgggctgaatgacggcgatcaggaagggcgcgtaataatccgcgaccgtagggaggaaatctgcggtgATTTTGTCTCAAtgaatctcgttcttgctgatgacgtggataatatcgacgcagaaacctacctgatgacccacaccaccaatccactgttatccgtcgacgcgatccgagcatcgttgcggtgttatgaagctgcggttaaaagtggggcggccgatagcctgttcacggtcaataaggtgcagacccgattttatcgcggggat
>Skav205266
CATTTTGGTCAACATTTTGGTCAAcaacatgttgcaacccttgacggtacaaaggacagtacaagactacatcaagagtacaaaattcccacactgggacaacttgaccacgtccaaaggggcatggcgacatccaaaagcaccaaggacagcgacttgggagttttgatttgatgccacttggtgaaatgcaaagaaagccgtgtgcaacttattcaaaattacaatctgctcaggagaagaactccaagaaagactcaaagacgaaagaatcgaaagaatctaaatctaaatcgaaagaattgaaagattcgaagatttcgaaatccaaaaaagacgaggaaaagtcaaagcaacgaggtcgggtccagagagtccatcgcc
>Skav235821
CCATTTTGGtgtgcaaaaattggtggcagtgcagcgctaaggacattagcttggaagaccttttctttggagaggagtcagggggtcagggaggcagaagtcgaatgactaggcaaagaatccgagctccttgttggaaatgtgtaggttccggaagtcttgtgacacatgtgagtgcaaatttcatgggttcaaacacgggagctccacaaatctacatgccatgatggatcTTTGGCTCAAGgctgcaccgaaggtggtgccagagggtcacatcgatgtgtccctgatccgctcca
>Skav230274
TTGGCTCAAactgactgggaaggccatggtcgagcacatcagatgaccatgttttgCCGTGGCAATGTTGGgaaatggaagttgctgacgttggcctgcctgctgacctttccgctggtggttgtgcaagttgtgccgtgttctgggtcaccaagccgcctaaaacagcaaaccgtcaactgctggcaagtgagttcg
>Skav205180
CCGGAGGCATTGTTGTCGAAAGtttgaaactgcatcaaatcaagcagctgcaatgttgaaggtgtgcacttggtatcatgaactcattaacctccctccatttcaagacaaaaggcatgtagcgaatttcagtgatgcaggatggacctatcacttagcaccgcttcttcccttgggccttgggcaaagtcggccgttcgactCGTAGCGTTTTTGTGCTCCAAGtttctgaaag
>Skav215804
GCCATTTGGGCTCCAGctcaccaggggtcttgccctggcatccgccctagctaaatcagcacctgggaggggagggcggtacaagggccatggcatacggtcccttggcgcaatgcgccttcatgtcggggccatcgcccttcaagaagaaggccttgtaaagcgcagtgccagcaaagtgcttgactgtacgcgtcCCATTTTGACACAtcaagtatcacaaatgtaattagtcacgtgggtacttcaaaaggtccagatataaagcatcgacgatgactcatagcgacttcatagcgtgagaatgcatgacacgcgactttgttgtatgtgttggagttgttgttctcaaaatctgatttctgattggcaggccccacctggtgaggagaaaaagcacttcaaggacgtgctgccgccatggaagccaccagatagatgcgaggcaccaccacctggttccttcatgctgtactgcttcgac
>Skav213969
TGGCTCAAGatggggctgagcgcggcaaagttgggcaaggccgttttgagcgcagacgcttggttgacgaccgactggtcagtgggggttgcccaaatcatgttggccatttcaccaaccactagctgtagacgatgatgtagacgatgatgtagacgacgacgacgacgacgacgatgatgatgatgatgatgaggatgaggatgaggatgatgatgatgatgatgatgatgatgatgatgatgaggataattttgattaattatgctgatgatgattatgctgatgatgattgccagttccatgttggcaaCCATTTTGGCTGAAGagtttgttggtcaagacgaattaatttcgccgctacctgagggcca
>Skav215675
CATTTTGGCTCAttgagattgatagcttgctcgtagcacgtggcagagatggggttttggcgcgggatagggagggcttttagaagtgcctggaacttgaccaaggatatcTTTGGCCTCAAGagagatcagaaagcgccagtggttgttattgagcagaagctaccgcctcaaccaaaacctccgttttcagtcgcagaggccaaaaaagaaggaggtgaccagaaggcatttgagcaccttgttggg
>Skav227925
TTTTCGCTCAAatgacccatcagaacgatccacagctgctggttttgctgtggatgctgggaagcagatggcatcaccacagcctcctttgctgtggtgggtcctgggatgagaactcacaaaagatccttatgacaccgaggaaagtcagttgtggcaggcactttattgCATTTTGGCTCAActttcggatgtagagcagatcattgcagcttcccagtgggcttcccacaagtgctggtcacagcgaaaagcaaaacccccgcccaaagcttggatcgactcatggtgttgggtcgctatgcgcaagcttctggtggtccatcctggctgcagagcaaatccttggtgacgagttgatggttg
>Skav234359
TTTTGGCTCcaaagcctgtcctattgaagctccggggccaaggttccacatggttccaccaaaacttgacaagttgatttgattgtattacttgatcttacttgcccttacctcgacgtgctcaaatgtgttaaattcatcggccgttttggtgctgtgtgtttgGCCATGTTTTGCCCAAtctcaggctttccggaatttgcgagatagtatgacatttatcgtccttttgccatccaagcgggagcgtggcaggctccacggattcttcgcgtttcggtaggcagttgctcttgcaaagctgcaccaaaatcaaatgcaacctgggagtgccatgcacagtagctaagca
>Skav202942
CCGTAGCCATcaaataaccatcacttaccatcctcaagactaattccccaacatcaaagcattattagcaatgaccctcaatccaccatcaatcaaccattattttcatattatttcacgattaatcatacatgatcccgtcgatttcccttggatttcaccctgttaaccatcatttatccttgattcaccaatttgataagcatacgtgatggttcactcaccctgttaaccatcgcttattggatccctgtTAACCAGTTTGGATCt
>Skav224615
AGCCATTTTGGCTacacaaccaaaacaaagtaccagcaccaccaaaaccaagtggctctactactttagccaaaaggctacactaacatagccaaaaggctacactaacacagccaagtggctacaccaacacagccaagtggctatataaacaagccaggtggctgaaacaaaaaaccaaaagtaataccacagcaaagcacagcttgcattcctcaaaggcctggtgtgtacatgtagctgggctcagggtttgaacccttaggggcttggcatttcacattggcactgtcatgcactgtttgtgagcagtgctgcaaatttagaattataaactatgtatcaTACCCATATTTGGTCAtggcaaggcaagggcacaaatcaaatggatttacatgtttgccatcagcaatttccattgcattcactttttgttttctaagt
>Skav210943
AGCCATTTGGGgcgtccacgaaatggttgccatcaaaatctcggcaaacccgattacagaTAGCTCATTTTGGatggtttgggtataggatggtacaaggtttccataggaattctacgatctgtccaacctgcatgggtcccctgaaaggacgcgaagttgaactccgtgctgcattcgaaccgagctgcagtgggactcaagatgggagaatatctcaaggcttggcttcggggaggtcaattgcactaaaatgttacagggtgcgctcctcgttttcgtgacgttaccaaagcatctggttatagacgttgccaaagcagtcttgagattaaagcagtagtattattgagatgatatctgaatcatatctgattaTAGACTATGATGGCTCAAGtttccatggcaagttgtagtcagtagactagcctcagatttttcgttggccaaaga
>Skav209899
CATTTTGGCggatacattgctgatacatttggctggCATTTTGGCTgataCATTTTGGATCAttttggtatttctattttttaaggcttccaaagcaaatcggaccttgggcatcacctcaagtgcacaactcaaggtttggttctatctgacttcgccggatgcctttcggcttggaggtagggttgagtgccttcgcggcgattgc
>Skav219915
CCATTTTGGgatcattggtaatgatCCGTGGCCATATTatcatcaccaccagtgtccaccactttcatcatcatcatcatcatcatcatcatcatcaccatcatcttcttcttcttcttcttcttcttattcatcttcatcttcaccatcgtcatcatcaacatcattgtcgccatagtcgtcgtcatcattgtcactgagccagatctgcatccactgccaccaagtctcaaagtggcacttgtattgcccaattcc
>Skav211310
AGCCATGTTGGaagtcagccagtttgtcactgctgcagatgcagaaactgcagactgttggatttggtgatgttaagctcacgtttgtCGTAGCCATTTCGGtccgcctgaaagtttgtgtcccttgctttcgcattttcgacgtgttctctgcgatggtggac
>Skav230094
CCCTTTTGGCATCAtcctggagccgttcccgatcacgagattcttcataggggtcacatccaactggaagccttcatcaaagatggttgactatcactagcacttgataattgattagccatgtcaatcagccttagccatagtcactgactatcttaatcacgcaatcaaagattgtaaagCCTTAGCCATTgactagcc
>Skav217602
CCATTTTGGCCAAtgtcaacctcaaggatcatgggatttgcttacttgactgggagaatgctttcccTTGGCTCAAtcaaaaacttcctgttgtcagtgatgagttggcggtgctaacgctggcaaaccatgaacttcctgcgggcttctcccaatttgatgaggttacttttccagctgtcgatgatcgccaaagacctgtgattttgagaggacgtctctggcagttgggtgagcagaagatcaagattgtgaagcgtgagaaaacc
>Skav203463
ATTTGGGCTCAAtcagatggatgtttgaagatttgtggatCCATCTTGGCTCAAtcagattcatcagatggatgtttttgaagatttgttttagtgacttattctgccaagacgc
>Skav224351
CCATGGCCATGTTGGTTCcccaggttgtgggtcaaaaattatcttccagggcctgctatggaaggttggcctatctgctgcctggaggccccagcccagcccaggtgctccaggaatgcgacacgacccggcagttctgtcaggagcaaaagcaacaggctgcgcatgggagccgttctgtttgcagggatggtgagtggatggtgagtggggtcatgatttagtccaagccgacgatttccaagccatggtgggaccagtgaaatggatgcatatggatgcattgggatgtataattgagatgtattggcaccctgaattttagactgcagaatgccggggcatttggaagcagcggcacgtccgcatttggctcaaGTAGCCATTTCGGCGCCAGagtcttctagttgagtccgtggagtgcttcgggtTTTGGCTCAAG
>Skav206175
GTAGCCATTGTGCCAAGctttgctttgactatgagagcaccactgtctatgaggtgaagctcgcccttactgatttgactgagctgatgatggagcagttTAGCCTTTATGGTGCAAGgggcagacgtcca
>Skav211923
GTAGCCAGTTTcctgtccttttcaagattccatggctttgagttgtcaagggaggtcagatttgagctgcagctggcaactgggtgaaggttctcccaggtcaggtgctttcatagaggtgagtgggatgaaggtagaaacctaaaaatgcTTGGCTCAAGatttagtttctgaagcacagttggaaatgcagcgctggtacttcctcatgcatgccacgcaaactcatggagaactcttcaactcagggtggaaccgtcagcacaatcagcactgattcttttccccatcagacgtattattgtttcattttttcctttctgttcgcgtgggctgcgtttgcccc
>Skav236572
AGCAAAATTGGCTCAgctggttccttgtcaataactatagtggttaataagaaatcgtagtggtttaataagaaatagtagtggttaataatgctgaatgatatgggttgattacaggtatagtggttcatagttaagtccctcgtcacaaattatagtcattgaaaattaggTTTTGGCTCcgtcccttccggtggttagcctgtttcgaccgatagcggagacctcgtcccc
>Skav221201
AGCCAGATGGGTTCAAGtcagaccatgtcagatgtatcgatgtctcgATTTTGGCTCAAGctttctggctcgtgtgtccctcgaggcaaaaccggtccgttcgctgcagcgttgtgtcgttgcgttgcaggtcggtc
>Skav230021
TTTGGCTCAttggtgctgagggcactgatttgaagccctGTGGCCGTTTTGGggtcattgcaagggcgctgcctgcccaccagtgtcatcaaccatcaaccgctgatctgccgtgttggaccgttttgccgtggacattggaccgttggac
>Skav208608
TTTTGGCTCAttcggattttcagaagaatctttctcgctggttgcgcaagttcattattcttcacaaagaacaggccataccccttcatcttcccacccatcatgttcgtgagaaagctttcgaatcattgaaagacttgctacataatcatcgaagtttcgaaaggctacatgatgtcagtgcccccactcaGTTGCCATGTTGCTGCAAccttctccgtccgctgttgatttcaccggaagaatgtcgatttggcgGCCATTTTGtggccacactggaacaaattcaattgcccaaacatcttttgttatttcaccaagccaatgcgggctccacctatttt
>Skav225744
AGCAATTTTGGatttgcgagtggcctcagtgtgttcgtgggtgcgcctttgtcatcatgcaagatCATGTTGGCTCcatttgcctcctgtttgctttccgtctcgcagcttctgttccaggcttgtttgccctttgatgcatatttggttgttgtcgagtacgtgaggttcttattgttttcaattctatatactggtttcagtggatggtattcttgagacggaggaggttgcaattctctgtgccacttgccattctcgctgagccagcagtgtgtgaacaaacc
>Skav221052
CCATTGCCATGTTTGTCAAtttATTTCGGCCCAAGactagggtgactagagacagctctgtacagcgctgatgcgattaaattgccgtgttgctggaaccaggaaaaggcacttgcatggaaccatgcagaaatcctgaagtccagaaccacccaagttgacggtggttgtcccactgacaaaagtgatcttgacttgaaacaggggaggtactgtaccatgagtgttgccacgatgggcggccaaatggacgttcccgcccaatatcgcccaatagactgcgatgatgtttcaggtctactactgggtgcttctcaaagtgttgaacacttccaggaccaactgga
>Skav201614
cgcatccaTTTGGTTCAAGcaattcatttggttcaagctgctgaaacttgctttgcagttcgtgatccgctgcctcttggcagagctgtttgacCGCATCCATTTGGTTCAAG
>Skav219760
CATCTTTGGCTCtggacggcctcccctcttgtgtggcctgagactcagtagggtcaacctgttcgatggcgttgagtctttcgagtatggtCCGTTGGTATTTTGGgatgaaaaggttctgcagaggaagtactgcaggatgagagtgagagttgttcccatgatgtaaagggataattgcagtggttgcaatgtgtgctgtttgatgttttggaaggtcccatgcgaggttcggaaggtttccttgaggaagagttgaggaaggaagcagtgaagcggcaaggaactgcaagaactgcttgggaaggagaaagagaagaaacatgaggaaagatgaggaaaggaggaaagaaagttgaggagaggactcaatttgaaaaaggaagagtcccaagtcacacatctttacagataggacttgtgatcctaaggctgttgcagctgtgcct
>Skav204520
GCCATATTCGCTCAcattcggcccgttaaaggtttgcggccaccccagggtgacgcccatagccgacgttggaagatcagcgatactcagctgccatgacccatttcgatcgatccaggtctcttcagacagcaacccccgtggagacgtgctttgctcagaatcgtatcatatccaagccacttggtttgggcctgcaatggaatatcagatagtatcagtatctctggaatggcagaaggcggctgaaaggtattgaaaggtcaaatccatgtagcgggatggatgtccatcttaggtcagctgattttttttgttttctgcatttttcagcctggacttggaattgtgagttgaacatgctttcaGTAGCCATTTCTCGGCTCAAGAGCCTCTTCGGCTCAAGactcaacagtttcaacgaagtgag
>Skav212263
ATATTGGGTCAAGaattgaaggatgatctcaaagaaccggaaaagcatcgcgtaaactcgcatcgtaatcagtggcaaatctgagcattgcaggttctaacattgtgaggccaactctgggcttttggGCCTCTTTGGCATCAAGgatttacattgagatcgagatccttttgcagCATATTTGGCTTAAGcttgactgctccagacaaaccggagcatcacgaagttgtagc
>Skav235544
GCCTTTTGCCTCAAttctgtgggaCATTCTGGCCTCAAGtctcttgattttggaggctgcaacttttgcgttggggaaagctatcgaagaggcagctcttgaggccgttcttcgggaaagctagcagcaagtgctgagccaaaaacgcatgaaacaaacgcatgtctccctggtttcaggcactggataaagctacgttgcacgggatcacaacggctcggcaagcagccatggctgcagccagcaatgcagcattggaggcctagcacagctgcatcatgtttgacttcagcggatagtcatggcaggctgcacaggaag
>Skav204641
TTTGGCTCAAGgTTTTGGCTCCAGtcgccatttccctatcaacgctggggtgcgttgtctcaagtttttgtccctggttcggattcatggcttcaatgacaccagatcgtgtttcgcaaaggcgccgccttgcctcgccacttcatgaaatggatgatggcttggaagagcctgtgcctgtaacacctgcaaggtcagaagagcttgagccaatgcctggcacacacatgactacattgactctggcgcaaattgtccgcaatgaaattcaaaatggattgagccccttgcagatgcaaatggcaactttgaccagtactgtgaacacgcggttgaatgaacaaaacatgcgcattgcccgccttgaacatgcgatggcggcagaggctccggagtcaacccccctcacggattttgctgacaagatcgcggaactacaggcccagattgatgccctgaaggtcacgcctcgtaccagtgaaggagatatgtcaaggacc
>Skav220674
AGCCTTATGGCCAAGcagacatgcactcgggcccgtgtgcgatgggacccccttgcggtcaagctgcaatgaaccAGCCTTATGGCCAAGcagacatgcactcgggcccgtgtgccatgggacccccttgcggtcaagctgcaatgaaccagccctatggcccagcctcaaagatggcaaggctgggacttgttctctagggaagtgcatcctcgtcttgtgacatcgttggaatcatggagcgacccacacaacactggaggagagttatggcttgggattctccccgaaccattgatgagcttcgtagcttcgtagggtttcggatggtgttggttcgatccctcatccttggaaacaccaaacggttcaggatgacgaaacggttcagtgcaatgaagggacccgctgccaggtgtttcagttcctgcaagagcagcctcccaaccttcgctgccacctccgtaccagcgaggc
>Skav209855
TTTGGATCAAGggctgcaatttgttcaaCCATTTTGGttgactatcctataatcctgtccttggtactactagagaacatagttataatatgttataattatatatggctgtgggtcaaaaccctgtacccctggttcccctatcattaaccattgttggtaaatcctccattagttcgctggttaatattgacccatagccatatattcatacttcgctggttcaccactgtcggtccctggttcacattggtccgggtggacctccaccatcgctcccatcatcgctccaccggtgggctgccgccaggcgcacaacctctcggagtcgatcttcactcac
>Skav228418
CGTAGCCCATGATGGCACAAcacctttgctacAGACACTTTGGATCAAGaagcctcactttgtagaacctcatcttgtcttgaactcgac
>Skav234966
TAGCCTTTTGGgttccatcattcaacggttcactggccagtaatccatcagacacttggaatgaccaccacctgtttctgaccggtgataatttactgatccttaacagccctgaatcatggtgcgttgatcctactgtgacgattccataggtTTTGGGCTCAAGcggtgactgtccgaagctttcggaaccatgctgtcaagccTAGCCATTGGGCTgctgccaccc
>Skav211032
CCGATGACATTGTGGCTagtgtgaaagctggcgtggagcagcggcaagtgaaagagaatgcctggaagggcgaggcgccggaagatgtcgatccctttgccgaggtgggcaaccttcgcgcagccatggctctgtggggcagcagggggtggCCGATGACATTGTGGCTagtgtgaaagctggcgtggagcagcggcaagtgaaagagaatgcctggaagggcgaggcgccggaagatgtcgatccctttgccgaggtgggcaaccttcgcgcagcc
>Skav213607
CCCTTTTGGCTgctctgttagctcagggttgtattacctaaagggggtctgctgccagctaccttaacatctgttaattacaagtgtcctaatgcggcttgattttttgagtctttggcgtcattttaggacacttccacttttgggcatctagtggcttatcccttttcgctgctctgttcgctcagggtagtatcatttttaaaggagatctgctggccgctgcgttaaaatctgttcattttacaagtgtcctgatgtggcttgatttttgagcctttggcatcattttgggacacttccacttctgggcatctagtggcttatcccttttcgctgctctgttcgctcagcgtagtatcattttaaaggagatctgctggccgctgcattaaaatctgttcattttaccagtgtcctaaagaggcttgattttatagtctttggcatcattttaggacacttCCACTTTGGCATCTAGaatattgagtcgtgcgaac
>Skav204289
TAGCAATTTTGagttgcaaatacgcatgcatgatcacatatgcgtgtagcgcccttgcatcttaaagtgcttcgggcttggagacttagtacagtccttagtgtcactgcgatttgttttcatggctcttttggcttcagccaaaaagacccccgaacaaggacccagctgtccatttcaccttgggtcaatcggtctatcataattgccttgcaaatgcagcgcttcagtgtgccttgggcctccatgatcattacggagggcgtggcttgtagatagaaggaacaccaacgaacagccggcccaagggacccgtctggctcgagggtacctgctccttgatgcgaatctaTGGCTCAAGaagaaagaa
>Skav211162
TTGGCTCAAGaTTTGGCTCGAAGctttttgcttggctgtgacctcccgaaatcaccagcagctcggcatgccacacatggccaccattccgcagactgatgatgagatggagatggaagcaatggaaacctcacagatttggaagtcaaatggaacgaccgaaggaaaggtttctcgttggctttctcttgtgaggcccctccttc
>Skav230922
GCTATGTTGGCTCCAGcggtgcagcggcccagcggcagggaccactctcttgtaggaagtcgactggcggtagtccaccatcatccagcaatgccaaggccaccctttcgactctatggcaagcagccttgtccgccagccagtgccaaaagtgaaatgagagtcagaaagaaatgcaaaagtgccagacgtcttgcggttgctgatgtctctttgcctcctgcaagaagGCCCTTTTCGCCAAGgagaatgcatacacatagaagggc
>Skav224988
CCACTTTTGGATGAAGgaggtttcggaaggccttgccttgcTTGGCTCAAtaagcgttgttttattttgagttccaactatgaattcgtttgcttttgtaccactctttcgttcatttgaagcactcctacattttgcatatgtgaccagtgttcagttcatgatcgctggatgaatgttgcattcaaacgggcaaaatttctaaagcagagccagggcaagaaagtcaagtgtcaaacaaggctgccttaaattttgagagtgcatcaggaattaatttcactgtggtctttgttaccgtccctccacccatcatcagccatcccttagccataccatgcaccttcaagacactcattagaacgcagcc
>Skav225092
CCATTTTGTCCCGAAGacgagtactggctattgATTATGGCTCAAGcttgtgttagtgtatcaaccgggttgctattccatgagccatatcaccggccaagtcattaagtcacccaaatatgtgctttgtatttggcatgtttgaatgagctgcttgattatgttggatgatgttcggtatgctgttgacaatctggctggccaatgaatgaattgatcgcgggtgtgcgaaaatggtggtaagcttgagcatggtgattttcacttgatagccagtactgttgatattaatggcttgatttcgaatgctactcatcgcTTTTGGCTTCAAcatggtcaatgataaagcaagtaatgatgaaaacaagcagatcgccatgcttatttagccttctgcggactcatggccatagcggccatggtga
>Skav201397
TATCCAATTTGTCCAAGaaatgaattattgtcggggcacccacacattgctgatccagaatgatgtctcaaaaaaatcatgacaatccagtatcggtcccatatcctagtttgctgatcaccgttgatatcctctccacacctccccaaagacctcaaggatgtcacgcgtagagtttgtccaaaagcgcatttgcatatcttCCGTGGCCATTTTGACTCAAGccatcacgcgacacgcttaacctacatatactcgatcctcatccgataatcaaa
>Skav234122
TTTGGCTCAAaaaacatagtgtcatttctgacgcttcatgattctgaagtttgcaacctcgtcacgggttccttgaaacgtcttccagtatagtgcaagtaggacaaaacagacagccaatcgtaaaacgatgcgtcactgtcaataaatcgacgcagaaagatgatatcagaggaattgtgtgtgtgtatggatgtgcatatgcgttggtgtgtgtgtgatcctgatcggtgtggCGTAGCCTTTGTCTCtcgcc
>Skav209711
AGGCATCTTGCCTCAAatgcgtttgagcttgccttgatcatactgatatgcaaagaccacgtttgatccagtgaactctgatctttgtaagtgcttcagactcatgtccggctgaactatttacggatcagatttcaaaaaagactttctggtccaagaccaaaatttcatgttagcaagtttgtggcattgctggaaaatcctttatgtgaataacatagactctcttggactattggactcatcattCGTATCTCAGCTTGGCACAAccatcgccatgaatgctgatgtgatggatgactcccaggctcgtggatgcttccgtgctttagattcgccaatttttgtcaacgtctcaccagttggtgttcacagtcattggtggtgcaaggacacaggacaggcaatcagtgagcatcagagtttcccaatcacaaactcattcactgaaGTAGCTCCTTTGGGCTCcgaaatcacacgg
>Skav208671
TATCCATTTTGttgttgttgatgattttggatgattctggctggatatgaccattaaccactaaccactagtaattaccactattgaaccatttgccaccactagccgccaactggtccctgttgttgttgttgttgttgttgttgttgttgttgttgttgttgttgttgttgttgttgttgctgttgctgttgctgttgctgttgctgttgctgttgctgttgctgttgctgttgctgttgctgttgctgttgctgttgctgttgctgttgctgttgttgttgttgttgttgttgttgggattgttgttgttgcgattgttgttgtttgctgttggccatcccattcaggtaccccccatgaattcacccgaattgatcaaccaagattgttattcttagttgttgtatgttgttgttggcatttccgtccttagtaattagcgattattgTTTGGCCCAAGctacagactccattgccgtg
>Skav217490
TTTGGCGCAAGctttccccagacaggtaagcacagctgtgccttctgtccagcgcttccaggtgtcaaaggatggatggaagtcctccaagagcgacttgttacaactagagcgcatcgccaagcatgtgatgagcaagtttgacttggcctgacgtgcgCGAAGCGATCTTGGCaacggcgactgtccgtttatcaatgcaagaccagaccaacaaaaccaaagtgtcacaaagccttgggcaatgggctctcaagacagtccaagatgctcgaaacctgctttatcaatcg
>Skav225624
CACTTTGGCTGAAatcgtgcgacaagagtctccaagtttttttaattgtgtaggctccacttggtgtttggtttcttcatggagttgccgtcaagggtcctgcttgagcggtgccttgaagctattgatggcttccctatcctcagctgggaatagtaccgtggtcacccatggctatatggattcccccattattttggtgggggccgcacagcacttagttcttgaacatgtgactgttgaagtagcaccatgcaaatcagctttcgcttggctcatggtgtttagacgcgtgagtggctcacatgcagacagccagctgaaattggcacgagcagcagcggtttgatcatttcTTTGGCTCAAGcgctttgaccaaccctttcgggaagacgtgtctcgcactggtgcgccatgtaacttaagag
>Skav214750
GCCATTTTGcaggtacactggttgagtagtttattaatatgaatctatcattggcaagctgggagagtcgaaaagttagaagggagaataccaccgctgatgatttggtttcgaaggcaatggaccttcacaaagggatatcacAGGCATTTTCGCATGAAGcgcatgctgagagtcg
>Skav205510
CGTATCCAATTTTGaaacttttgtatgtgggtgttgtggttgaacaaggcgtcCCGCATGCCATTTTccaatgctgtagaggttcacataaactcatggggttgggcaagaaacatggcatggcactccaggcttgcgaggaacagaagctgtcgcggcaaccgcagaccctattgcgcttcttgaggggccgagcaggcagcaagcattcagtcgttggaacgctttccaggctgtgagtaggcatttgaaatcatctgaagtaaaggtaaatagaactatatagacctatatagtcccagtggaacagaaagacggtaaatttcagaacggatgctttcgtgtcgttttgcttcctccttcacaggcgttttatttctatgcaatctacacctggcaccaggtgacctccgtaaagccgaagcc
>Skav223341
AGCAACATTGCCTCAAGttgtgctctagcagcagTGGCTCAAGctgccgtagcctcctaggttccgataggcatccgtaggctgggtaggcggctttcctc
>Skav209665
TTGGCTCAAagtgctgaaaagcttgcaacatcagatgtgagcagtgccatgagatgtagagtgatagctttgaggctgttctaccaccttggctagttggtggttttagtttgttgtgttccctagtatttaggtaggcttggttgattaactagtattgttgagatggctcatagccaccaggcagttggtgtatttgcatccatgatgcgaaggcttcttaaccaatggcacagatggcttacaacctgctcccctgagagtgCGCAGCCACCTTGGTCGAAGatgcggctctcgaatatttggctgatttgtggctttgacttcccttttgaacatatttgaactgtcaccatttgcggttggggtttccaaagtgcttggtcccatggcctatgaagacagagaggctccggcaaatgatttccattgatcacttcgcccacgtcctttgtctttgcc
>Skav227719
AGCGTTTTTGGCTttttcgtaagcacaaaacgcgttgccagccgtgcgttgaagggtaggcgttgcaaataagtttgcaggcacggttcgaattggacaatgttcgaactttgaaaagaatgttacaaaccgttggagactgtagacttgcgtttgtgagtcccgcaactgtgttgtgcaattatgcaaggtagatcaatcctggagagaaacaattccatgtttgaagacgtgttgggccttgatctcaaactgcctgcaaaacatgattttggaagtttggcctctctctttcactgttattttccgtcaatggttcatgtaatatccaaaaccaggcatggagtccatgcAGCGATTCTGGCCCAAaggaggttggcatccatgcgttcccttgtgacgttttgaccac
>Skav204206
CCGATAGCCAGTTCTGTGTCCAGcccatcacatgtacatgtttatttgatttgttcatttctgcaattttgctttttagacacttatttcatttcttatttgaaatagaatatacatatagatgttcctagatgcattcaaatattgtgtcattcttatcaaattgaagatggattttacttgtcatctttgcccccccagcttcagggccaaggtgaaagcttagtcCCGTCCGCATTTGGGCTCggagggtgccatccaccgccatccccaacgtgctgtttccctcatcgcc
>Skav211621
TTTTGGTCAAGctcaacaactcaaaaccttttgaaatccatagcttgtttatttgttaaccaccttaatcaccagccttcacaaccttaagaaaccacctCATTTTGCCCCAAactccccaaccgttgctgggcacttcacctgcgttcgtcaccgcgtggcccaggtctcgtt
>Skav230562
TTTTGGCTCAttcagattttcagatgaatctttctcgatggttgcgcaagttcattattctgcacaaagaacaggccataccccttcatcttcccacccatcatgttcgtgaaaaagctttcgaatcattgaaagacttgctacataatcatcgccgcttcgaaagcctacatgatgtcagtgccccctctcagttgccatgctgctgcaaccttctccgaccgctgttgatttctccggacgaatgtcgatttggcgGCCATTTTGtggccacactggaacaaattcaattgccaaaacatcttttgctgtttcaccaagccaatgcaggctccacctatttc
>Skav234328
ATTTTGGCACAtacccacatggtttatatgggagtcgcgcaataggtccttgtaaggagtttagccttcgatggcctttcatgtcatgaattgtatagtaacaggtccatcggacatggcattcgttggtgcattgaatttgcctgcaagagatcctgttgtgggaCCTTTGCCATTTAGCCACGAGacaggtaattttgtcaacatctcccagtcctgccacttccgcacaaacacacacattccatatccatgatggtagaacttcatagaaattctatgaatttcacggatcaatcattgttatgcgttgtttccacttaggcatcttgaagaaaggtggtccacattgtgttgcctcttgttatttgtgtagagcgtttgcgtgactcttgcagca
>Skav205508
CGTAGCAAATTTGaagctgctggcaagacgtgggatcaccatggaccacccatcatttcccatcatttcggaatgcagcatgcgcagatccgtcttgcacatgagtcgagtttgctcgcctcagtcctcgttttGTCGCCATGGTGAGGCTCAAGgcatctcaaggcctagtcactatctttgtaaagttgtttggatggtgacggtgccat
>Skav208999
TAGCCGTTCTTGATCAAatcacaattgtgatgaactactaaggcagtggaaaacaaaaagcaaacaGTAGCGGTTTTGGTTCcgtgggattttcgcattccgtaaaagaatagtagtcaattgagaaaaaaaatgagttccatgggcgcacagtttcactggcccaatttttttcgacgaacacatgcaaccgttcagcc
>Skav206004
CCATTTCGGATCAgctacctctgtgacaggttgacaggttgacaggttgacaggttggacacatttggacgaggctgactgaaatagagggcagcatgcaaccgactcaagtcttctccatcctcctctatagttgtggtatgagctgtaaagcaaggtgcaattcagcatgccgcttgaagcggaccctgccgaactccgtgcctgattcggcttgcAGCCATTGTGGCTCAgcgggagaactcccgcagtgtccacc
>Skav227070
TTTTGGCTCAAGacactgagcttgtcagtgagctgttgcgcacgggagtagcgacagtagcttcctgtgcttgtctcaccgcacttgcatcgctgctctgaactccgagcagggaaacagttgggctgctgcgtttgggtgtaactggttgatccaagactagctagctcctgctcacactatgtctcagtggttgaccattagcatacacgtgctggggcttgCCGTCGCAGCTTTTGGCTCtgtgtggggggtaggcccttcgtgggctgccccctcatccagcaaaagggggcagatccactgggttgcctacctggccaaaa
>Skav223044
CCGTAGCCATTTTGGCTCAAGagTTTGGATCAAGactgagtcaacttctgagttgtgagcctaagtgagtgctttgtgctcgca
>Skav210799
GTCGCCTTGGTGGCTCAggcgctgttcgatcatgccatggtacctgcctgagtcgcagggggcgaagtgtgtcagagaaatttaatgaactgtgttaagcgagccatgcatctcttcatagcttttcatcgctgttgatagctgttgatatctcttgatatctcttgatatctcttgatctgtagatctacaagtgtaatttgtaaaaaaacatggaaCATTTTGCTCAAGcattcacgctcaagagccatttgcagttcacctgtaactgtaactgtaggacaagaacaactttttgcgcc
>Skav208673
TTTTGGCTCAttcagattttcagatgaatctgtctcgatggttgcgaaagttcattattttgcacaaggaacatgctatacctttacatcttcccatccaccatgttcgagaaaaagcttttgaatctttgaaagacttgctacacaatcatcgtcggtttgaacggcagcatgatgtcagtgccccttctcggttgccatgttgttgcaatcgtcttcgacccctgttgttttctccagatgaatgtcagtttggagaccatctgGTGGCCACTTTGGAACAAattcgattaccaccacatctttcgatttttcaccaagccaatgcgggctccacttacttc
>Skav225841
AGCCAAATTTGGCTGCAAaaaaatgtggagcaagctcgacagatgttacgaggcaccgcatggcaccacattgaaacctggtgcatcctgcactcacttgcctgatcataaagtgtcatcacagtcatggtcactctagggagtttgcctcacggtgtgttggatgtattggcatagctattgcaatatattgcaatgtttgctgatgtttgctgatgccagattgccaaaaagacggaacgattggaaggtaTTGGCTCAAGctgccaagctccgctaccgaacaaagctgcagggg
>Skav218934
TTTGGCTCCAGggtcaaggctttgaatggcaagacctgaaattcgaaggcaacgccaaatacctttgaattcgctgtcttcgggagctttgactcctgaccttggCCTTGGCCGTCTTGGCCTCAtgggtcttggtatgcttggtcttggccttacatctctctttgcctcgcagggccttcgctattggctgcttgggcttccagttttctgccttcttccagctttggttcgcatcttccgtggttctcgaactgccgtggccaaacgtcggagagttcatggcaccagtacagagcccaagcttcgtttgcctacg
>Skav221851
AGCCATTATCGCCCAtcattgcccgtgccgaagcatggttaagcactactaccctgcttccaaccattctcaacaagtatcatccactgttcaaccattgcgaccgattattaaccaatgccttcaacatccttcaacaacaaacacctgccagctttttcaagcatgatcaagcagtagtaaggctataccttagcatggtttgcttcaacaagatagctgatttctgttcagaggatagtgcgttgctcatgtaactgcacacctagatcTTTGGGCTCAAGgtcaggtgccgagtgctttcactgggctgagggggaccaatcccgaagggggctttgtgcctccggagggggagggaacctttggccttggtggaagtgctc
>Skav235791
TAGCCATTCTTAGCggggaaaccaccagtttcgggggtatggacaccatttttggacaaagccatgtaccattgtaacttATTTTGGCCCAggatgaggactccaggccacttagtgaacagtttgggggtattggtttgccaaacatcgttgtatccatggactaatcccatgtccggcccctCCATTTCGGCCCAAGcagtatgggcactccaaagttgtgtgcataggacgttgaatatactaaccacaaattgtccattgattcaattgattatgttgattggccatcattaaaaatcattgaacccgagattgatggataccccacaaccagtcagaatgttcggactcaaaaaccatgaaatcgaagcaccaagcacggtttgcgactcccatagatcg
>Skav210216
CCATTTTTGCCAAaatgtcaaagcttgaggtgacaaacaagaagagacgtttgtcctggcaaggataggactctgatgcccggcttcctgtagctacatgacctcaatcgagagacgtttatgcgaaaaaaatcagatgccaacggtgagagccaacaattcaggccttcagattgtgcaagtataacaaaactctgcagtcccttcctgaggatcttgcctggggtgttaacaacggatGCCACTTTTGCTCAAGtgccaagtaatggcagaaagcatttgctcaaatgcttcacggtttcttccattcgctttcgccgt
>Skav208884
TTTTGGCTCcctttgattcgacatgatgagatcggaaatggaatttcataacaattcttgtactaggactgcagtctcagaagggtgcagaaggatttcccagagcgaatTTTTGGCCCAAactctgtcttcagacaacgcccaccttcctctgaaac
>Skav214383
GTAGCCACTTCGGCTtttaaccagtgcacagcatgggccctgtatggcgaATTTTGTCTCAAagcacaggcccgtcccagagctcatacaagacaagactaagccccggtgaaggaaattcgcccatcctgcaaacctcagcccacttgggcagcatagacagccatctcttacacgatgggcacgggccacctttgaacaggcagcgctctcgctcctcccgcaattggaaggaactgtcaaagca
>Skav235975
TAGACATGTTGGCaatggaggctttcagagtgtcgattctgactcgtcatgattgcgctctgcacgtgcgatgtttccttgcgattgggacatagcaaggggtgtagcctaggagctaggacatcccaggaccaagtcatgccactgtagatcactgtgtcgcaagtgttctgctctcgggttcagatgaaaggtcaattggaagcctcttcagaatgcttcgtgcttctttgagccctatcaaaaggtttaatctgtgccttctccggagcttctcaatgatggctttggtatgctgtaatgcttttggtactcagcaagtttactcagcaagtttactgagTTTTGGCTCAAGttcacaggtagcacaacaaaccccgagactccaaacaatacacggcagcgcca
>Skav215314
GGAGCCGTTTTGACTATTTTGGCTCAAGagccgtttcgactattcaaaccatttggcagaagagcatagcgggttgaaaaagcaccgttgctgacgcctc
>Skav204918
TAGCGTTTTTGGCagtcacgtttggtggtttctattcacagcccctgagtgcgctgtgagcagtgcaaccagctggcaagcctttttgtgtgtgtgtggatgtgacgatgaatactgacgactaggtccggtccaatatgttcgcacaatgatggtttacaccgcaaacgttggaaaccatctatagatgatggatagtccattgccaggttattttgcgaaagggtgccggaactttcatggttaaaatcgcgctccctgcAGCGATTTGAGCTCAAacaagtgttcaaacttcgcacctcggaacttcaatacatccgacccatcgtcgagatc
>Skav221526
CCATAGCCATTTcaccaccattgcttctgatgactagttggtcgtctgcaaggagcatcatgaagcttcgcatcaggtcctctggcagcgaaactgccgtgatggttttaccacagcgggtagaagcttcgcataagttgatgcttagctgatataatgtaggtaccgggctgatcacgtataacttaatcatgttataagcggtgttatttggttgtgcataatagttgcttgataatcttgatatatgatgatagtggatcctgctgacatcaatgtggtagtagcttatccggcgcaatcgatcctgataacaatgtttttacttagcctgattgagctccaaagtgaatcagttcagtgTTTGGCTCAAGcatttgccgtggcaaggcaaggt
>Skav235164
AGCCATTAAGGCTtccaaacattggataccaagaaggcctggacgttgaccatggaatgactggaatggcaatgaaaagtgtcgccaatttttctgcatttcagtggcccaaagtgtgacttggcaacttgcagcgcTTGGCTCAAattgatttagacctaaagctggttagccagaa
>Skav204618
CCATTTTGGCCAAacattcccactggattatcgttccgctgcctcggataatgatggaatctgtttatcttggatactactcgtacgtcgaggtttttatcggaaatttatcactcgtttgttgggatccttacttgggataacttgggataataccgtcatcaaaagttgcgcagttcacatcccagtcgagcccgctggtcggttcattttggggttgacagaagggtggtgacccatggccgcgtgcagagccttgacccatgccttcCCATTTAGCTCAAGggacttcgtgtccttgtttgaactttgacctactgtagatccatctagtctatgcat
>Skav231320
TTTTGGTCAAGaccaaagccgatctcgccactttacgaaatctcagagactgcaagtgccaatcagccagaaaacacatcattgtaataaaaaaactgtgcgttcttaattctaAGCCAGTTTGTATCAgcgtaccttacattcagggatttgggcgcgcttctgtcaaaatgccataattttccactttttgtttctgcatcgatcttttcaatgaggcacttcggtaccacgacacagctgtattggagaacttccaccttgcgacgggatttgagctgatgcgctcaaggaatgctgacagctttgatgcaacacgccccattttttcccatctcttcactccgcaagtctgatgggctcaggtagatctatgattttccagttttccatcagctcccataggacatcataggactcacttgcccggacacatgctgtgacaaagtggagtagcacatgtttcaggagtgtttcc
>Skav207654
ATTTTGGCACAtacccaactgaagcaatgtcaacattttcagtgatcattctcaccatcaacgaaaaccatctgacgccaattttctactcaccatgaatttttttcggaatggctatcctgttctacttgcttttcgacttggatctggagctggggttctaactatggttacaagccctgttaggaggcttataatccccttagaaactatgtttagtgatcacttgctgagatcccatcctcaaaagccggcagttctcctcttctcctggcgagctcatgaatggttgccaccttttcggcgcagCCGTCAGTCCTTTTTCGCCGAAGctgagtagcaggtacctattggaaaatgacagtctgaacaggtgtgcatatatgaaccaaattcaccattgccatactcatgatggtggtcagttcatagggatcaactcttgtgatatttcacggcctggatacgttcatcggcaaagaaaagtgcggacaccgcc
>Skav225241
GCAATTGTGGCGTCAAGaaagtggtagcattcatgtggtgagtcagtccttgatacagttttgtaattgtttgatctggaattataCCGTTTCCTTTTGTTCAAGtgttgaagagatcatctcattgtcccttggttggcttgctttcatccaatttgcagcattga
>Skav229821
AGCCATTTGTGCTgtcagtgcttcgcagttctgagtcggaggcacgcgtttctgcaagtttggtttcgaagtgtttgggtcaccatctgtttagggtgcaacaccataatagatgaccggaagtcgttggcacttgttgtacgtggttgtatgaaatgtggccgtcatcttggaatctctagaatcagtcaaccatcatgggcattccgataaaatttgatatggttcattttctgagccgaaatgtctCCATTTTTGCTgggcaggtcctttccgcagacatggcggtggagttagtgagcacggcgtttatgatggttgggatctgagaagtaagcgacaagagcactcgagatccgtgaggcaacgcatgtagtgaagtttataccaaacagctcttgacgaagacgtcgaaccaccaagagattctactgatgtgcgagcagattcgcagtcaccacatccttttgaaaggcttgaaattgtgacctgggcag
>Skav206997
CCGTCGTCGTTTTGGCgtgggggccccagaaggaatatccatggcatatcctgcgtccatggcatggagttgttttcggtgaattggaagagaaatttgtttttttttgggtgtggttcttgaaaattgtaggaccttagtaagaatgaaacacttgttgagctgcagtaCCGTACAATTTTTGCattacaacaccctgctgccccgtga
>Skav230539
TAGCCATTTATGTCAAGcactataaaaccatcaactagattCCCTAGCCATTcatcagcccttcatcagccattcatccaccattcatccattcatcagctgacctcacatccccagttccgctccgctcctcccaccgttctccgctcccagatccagcaactctttgagcagcggcgccggcgcgtggctgagacgcggcgagattgtctgagc
>Skav202149
TTGGCTCAAGcgtcctcaagcgtCCATTTTGGTTCttgccttctcgaacctgctgcactttgccttcttgcc
>Skav213808
AGCCATTTTGGCTCAAGtGCCATTTGGTTCGAGggtaccaggccataggtcctgagagtgtgaaattgtctagacatccga
>Skav230476
GCCTTTTAGAGCTCAAcgcagtgcagtaattagattgaatcttttgtcgaaaacggattgacggttcggtcaatgcagaaaaattggattgaggtttttgcggctagtcttacctgcgagtcgcgttgccttctgttgaaacatgttttggaggtggagcagaaattatgaaaccaactatcgatgatgggtttaccaactgaactcagcaatcattatgatatggtgtTAGCTGTTTTTGCTCAgtgcttgaaattcgagagggatattgattagattagatggttgtcggtaaagccatggacaaccag
>Skav228706
GTACCATTTCTGGCcatttgtttcagattggaaagtcgtcgttCCATTTCGGCTCAggagtagtgcccgaagctgccacatcacacggtgtgcttttgacactttccgttcgctgcgtttttcgttcgctgtttctttcgaagcc
>Skav214340
TAGCCCTTTTGtgagtatttcgtgctatcaccgcacagctctgaaggatctactggagcgacccactccctgcttccgattgcctcgcatggccaaaaagctgggccttggCGGATCCTTTGGGCTCAtcctggacgtggcaggaagcgtgtacgttgcttggccgggtcagctgcacttggcaaaaggggttgacttttggagctcggacccttgcagatcaccacatcaacttgattctgggacccttttatataactttttgagtccgcattaacccgcatgacattgcaattaatgattgtaggatgatttaggcaggtcctgcccattctgttttggctgtgcttgcccctggctgcaaatcttgggttcagaagtactttcaatttttgttgatcttagtgcatttgcgtttgtagttggcgggcgc
>Skav204185
AGCCATGTTGGaccttcctggaagctataaaggttttgctttttttctttcacttgtctctgccaggaaaatgggtgtgtgagctgcttcaagaaggtctttatttgtctttatattcttatctctttttttgtcggcatgatcgaacctaatcagaaaagtcttgcctcggaaaccatgaccaatcataacagacccgttttccatgccttgaagccttgaataggatacttttactaggaagaccttgcatgtcctgcgaaagcgttccattgcctatgagcaaaaatgtaatccacctaagaagaacgaccttgacgTGGCTCAAGactactgtaggagcagcacctttaattctcaaggttgagcaaaaccctgctgaaaaagccatacggaaaccgtgggattcaagtggattcaca
>Skav205816
CCGTAGCTATTCTTGGatttcacctctCGTAGCCATTTctagattctagcctattcttttaggagaagttccccggcataagaaactattgtgaacatagaatgacaaggatttgtgggccggatagggggcatcagcagaaggtttttttttttttcaatcagaaatatttttcaatcaggaggttcgcaggcagcgattgagggttgcaaaaaacaacagtggataggaaacatggttgaaaccgcctggaaccagaaaaagattgggatcatgacgtagcaaacccttgttggtgcttggtttaggactttcattgctccaggatttagaaattggggaaatgggatcataagttgatgcttgccgtgcgcgctggcgcgcccgaggttc
>Skav223019
CATTTTGTCTCAtgtcgtttcacctcgtttcatcttgtttctttttgtttcttgatttttgcatctgcgcagcaacagtttctttcatttctggtgacctggcaggtcagcacaggtttgccagtcatgatccttcccagaaatcatgcgaactgggtggagctggcgaagttgacttttgcaacatccaactgctGCCATTTTGaagcacggtgttttgttctctcagctgcgcaggt
>Skav217188
TTTTGGCGCAAtctttatgtgttgggctgcttcacttgcaataaaacctgtgacaatgccttgttgggcagagttgatagggaatggaagcccagcaactatctttgatggtttggtggacctcaggaacggtaagcaaactgcataccaaacatgtttccgcgtttgccgagttaccgcttgagttgacatggcccatgagacaaattacctctttgaagctcagtagggctgcaattgccagcatgaattcgttcgcatggtttaaaatagtgaggcggtcagctgcccctgcccttcgcatgctcaattggtcatcaaaagtatgagcacagctggccgcatCGCAGCATTTTGCTCcggggtccagcttcccttctttcg
>Skav218511
GTAGCCATTcaaaggtatcaagaaaacattgccattctcgggggctgaatcGCCATTGTAGCTACAAtgaagaacaatcgatccagtatgagctaaacaaattgaccaggattagccaccgccggaaaaaaacttgtattctgagtgtgagtgcatgaggtaatgagtaccaagaacagaatcaccatggttgactatcatcatggttgatcattctcacaacttaggggcagtgccggatccagccgattctcactttccatgcttaaggcttcgttacattcctggttgatgagtttagttttggttgggttgatttgcatcccccattgatcccgagtgttcaccatatggcagggactggtagggtttcccagaaacatcgttttgaacccgtagccttaaggtgtttcggtcttagccttggttagcccattgtgtgccctggcacccgtagaaa
>Skav223777
AGCCATTTTGGCaggttcctggatcattggccacagtgccgcatgtggaagtagaccggtcgttcgcagcgggtgaaaaagttgaatcaaactgacccacttttgatgagcctagacctggggagaatcaagggaccatgtagcaagcgatcggcatttgattctgctggtggtttctCCGTTTTCGGGTCAAGctcagtgctggaggtgattctgctaggtgcgattccccgggctgcacgcc
>Skav222620
TAGACATCTTGGCTCtccttcagatttaatttttcacgatgaacgtgtttgcatgttatgatgttgatgactcGCAATATGTGGCTCAAagcatagtccttttgtttgcggacgatgggatatcaccatccttggtatccgtaccagtggtgggatcctgctgcggattactggaattattgggggtatccacgagaatacgaccgcctcagggcggtcgtcag
>Skav206032
CCACTATGGCTCGAGaaacacccatgtggatctatgtcaaattcttccccatttccatcggttcatcctagttacagactaacgcgatcccacggcttgatcaactgttccaaactggtccatgttggtgcaatttttgtcctgatggtaacagttacacccaaagctgattcatttcaaagatcgctggcatgattcatctcatcattcatctatggccgtcactcactggccctttcaaaaccacctttttcttttgggtttacctcattcaggggacgttctcactgaatcctgcaagaaactGCCACTCTCGGCTCAAGttcaaaccttacaactcgtcgccgggcggattggcatgtcattgctgctgatgtggcggacactttcgttgccgctgctgataacggtggtcttgagctctttattctcc
>Skav205850
CGTAGCCTTTTcccccttttgtagtgtgcatttgcagcggaggggcaaaacaggtttctgatttgaaatgtttttctcgcattttttttcagcaggaaccccaaatctgtttcagcaactcttggaagttgcgaaaacccaaacgttgtgaacagtgcattgtgtgatcagcgttcttggcttggaacccaatggtactcttccataggcacaaggtatcacagtatcaccaaaccttgccagctcatgcagcgaccgatggtgattcatactgagattcgttgttttgagattgcgctattattttgaaattccttctttgcttttgaacattttttgtcttggaatttccgtgggatgaattccttgtcaacaattgtgctggttgatgcgatgacagctgtagcgatgtcgtTAGCCGTTTGTGGATCAAactgaggcgcttgtatcgcgactcttttcccattcaaccgccgcgcaagattttcaca
>Skav201022
GTAGCATTTTGTCTttgtatcccaccaatttttcagcattgatgttgagaatgatcgctggtacctacaaacactggaatgcaaccccgctaggtaaatgtgttcccccattgaaaaccgttgaaaaccatatttcgcttttcaatattgaatgcgtgctgcAGCCAGTTTGTGCTttatccgtcaatgcatggacttgagccacgtcccaaggcaaaaaacccagccgatcaacacaaatgtcggacacatcaacaaaaacgattgagaaacatatttcccatgcgggaa
>Skav215363
TAGCCCCTTTTCACTCAAttttggtgagattttttgccaacacccacacaagcacgcgcacatatttgccttcgtacgcggaagggggcgattatcatattatacaataacgacagttaatgacattttgaattgccatgaccatttacaatgaaacaaataaaaaaggacgaattgccacgaaatggctattatggccataattcatcaaCCATTGTGGCTatgtcagtcaCCATTGTGGCTatcaatggcggctattattggctacatttctccattgttgtggcctgaattccaattcgcgaggttgctgcgccagtccgccccc
>Skav228943
CATTTGCGGCTCAAaaaacggtgtgaaatgtgtgcgctgtttggtgtccctcctcgtcgctgttggagagacctattgggagatattgctaccctgcaggggctgtttgggtcatgtcgagcagctcttgctagaaattgggccatgttgagccaatcttgccgcttgttgggcacacgttggggtCATTTTGGCCCAtcttgggcccatgttggccacatgttgggtccatgttggccCCATGTTGGCTCcatgttggcccc
>Skav220850
ccgtagccaTTTTGGCTCAagcttttggctcagagttcccccgaattcggtcgagcttgcggcgcttggaattgcccaggcttgcactccggtccaggggCCGTAGCCATTTTGGCTCAAG
>Skav235197
GTAGCGATTTTtgatgagtcaaaatggatatacaaggactgaccaaaaatatttgtgattggttaagaatgatgttggggggttgatgctgatgtccaaagagtcaccgctttgagtttgaacaacggctCAGTTCGGCTCAAGctccgcgttgccacgtgcgttccctgcattggaggataccatggtgtcatctgcattgtggctgctgatctttgctcccttgagcaccgcgaccttcccttcttgtggcggtggcacaggcagcggcagcaacagctccattgacattccagtggaggtcaatgtgcaggggcagagtggcaagttcaccattgttcccaagggatccagtgggaactcggtgggcatcagggtcacc
>Skav213477
CAGTCTGGCTCAAGatagctcagcatgatcaggccttttGCCATTGTGGCagttcat
>Skav202919
aTTGTGGCTCAAtagcttgctaaaataggtgtattattgccgttttgccactaataggcaagtcatacattgtccttacacgacttgacgttcaagctttgtggctcaatagcttgcttcacagttttttggcagcttctgcaggcccagaaacactcaaagggcagaatgatggctgcgaatcactcATTGTGGCTCAA
>Skav233560
CGTACCCATCTCGGCctgaactcaAGCCATGTTGGgagaatcttgagatctgtccgggcttatcttcagcaacttcgggcttatttttaccaacatggtctccgctgaggcacattgagcccttcagacgctcatgctgggaacttcatgcgattttcgaccgttttgaaacaacgcctaaaacaggggattctagagcaagaacgccccccccaagctaaagcttattggcaacctggcaattgcccgcggttcacgcgctgacacaatggcccagcacctctggcgctggcggatttagccactatgttcttggtttctaacctgaagcgacacaaccagctggatgtaaaacatgatcaactatgaatccatcaatttccacatagttgcggcgctatg
>Skav232168
CGTAGCCATgcacttgcagaactctggggcccaatctctcacccccagttttgcgcaacaagaagaaactattcaatctcttcgtgccagcgctgacattcaagctcgtcgtggtttgcccccaatggtatcagaatttttgcaagtcatccagcaacctgcttccgacccattgccaccttatagcagacagttgagcattccttttcgggggttcatcgcgagtgcaggtattcaacaagggttgaattttttgatatttcatcaCCGTAGGCATTcacagatgacccagtgacttcgctcaggaagccttcgctattggccaccccagagaaattcaagcaatcttcccctcttgcattcgaaaggttgtggatgagactctgtcacaatcccatgaatccattgccagagagagaacggctgaactcaggagatgggcc
>Skav223254
CCGTAGCCGTTTTGACTCTAGggtcagacTGGCTCAAGtcattcaatctagatcaaagggcgcgttttgcgtgccccctacttacgttctttaggtgcccctgcccaacgtactagccagcgaatcc
>Skav236066
CGTAGCATCTTTGGaagggatgatcggtcacatgaaatcctaagattcaacaagttcagcagagcaacagcagccactgagccacttggaagcagtccatcagatccccttgatgtgacagtttcatggcaatgctacaagttactacgagctgtcgatcccccgtggttttgcttcaccgcgtcgagctgtccctttctcagcggcgaagtggaccgccgcgttgcgacgtgaccgacccgTGGCTCAAGacgctgaagacaacttttttccgaagatgcagatgaatgtgtcatgggctcgccctgagccgaggccccacccaagtctcacaagctcagagggtaagttcttcaaaaaaatgatttcaagcatcctcctagcagctccctcccacagccatcccatcctcagccccccagtgcaaaaaaccgcc
>Skav223868
GTACCATTTTGatcacagggtctatgttcatggtcgcctttcatgcttgccatcaacatcagtaggatccttaccactacaggcaacaGTATCCATGGTGGCCCCAGgattggatgagctcgggtcctttgctcagcactgttggccgtcccatctatgctttgggcattgtccaggtaccaggcttgcttcatcttcacccatacccaattgttggttgcttgtcacaggcacatcagttgtgcacttgtcataccaagaggtgtattttcttgaaagtgagtttcctcaagaggagtaagcgacatcaagcacacctgatggtttctcagtctacagctcaaaccacgaaccgcgcttcgaatcttgttccctttgcggagcc
>Skav235726
CCCTATCCATTTTGaatagcatccctttggcgtgcccagtcgtgaccattggagcgactcatcgatttttcaaaggaaattctcaaccatgtctttgaatgatCCGGATCCTTTTGGCagagcaccaattgatatccagtcactgcgatCCCTAGCCTTTTGtttctttattcaatcattaccttgctagaacttcatctcagcccatccactgtggctgctgatatatcttcacttttcttcagtcagattcgagctggaaatttacgttctggtctttga
>Skav222989
AGCCATGTTGGtgtcgacatggtcaattttcctccattgaatcactaaactagatgaaatgaagTTTGGCCCAAGactcccaagacccttcttgcttgagccctgcctttcatagc
>Skav213433
CCATTTTGGGTCattctgatgaccattttgggtccatattctCCATTTTGGGTCA
>Skav201041
AGCCATGTTGCTCgctgagatggagatccagccagagcttgacaaccccgcaggtccgaacattgctgcagcaggtatgccgacccctggaggatctcagaatcgcttggttgaaaagtctcaaggaggtgaccctcagcagagcttgcaattcttgcaacgcttgcagttgtttattttattgttgttgctttcttattatttctcttgtccgtgtttccagttgcatcctcatacaaagtcgttctgccacagttgttggtgcaccatggaccggaaaacaccatggactttgtgcttcgcagtccccgaggattctggatGTATCCATTGTGCTTGAAGagctc
>Skav205104
ATTTTGGCACAtactcatttgacggtggtaattaaccttgtgcactggcaagaatccttggcaccattgttCGTAGCCAGTTccgaagcgggaatgtccaagttcttttgca
>Skav220241
AGCCATGTTTGGttagtcaggattgagttcaaagtttcgaattgTTTTGGCTAAAGtttcacaatgttagtcatcgttggtttgtcatgaacccaaacatggccaaacatggccaaacatggccatgaccaacacaatgcgaaacaacgatgaacccaatggtaaccctcactaaccaaatcatggccaaccgttgtttcgcattgtgttgGCCATTTTTGGTTCgtcagcatcccccagcgattttgtgggcgccttgcttggcgcccagggccca
>Skav230865
TAGCCTTTTGGCTtgtgctggaagagccttcgcaacaaaccagctcgcttggagtcgagaacagcggaagcagctcaagcatagtttgcactttgatgcctttatcagccatgactggcagacatctcgctggctgaaatatggatctttgctgttatttttcaatgccaaggctgctgctgtggcaacactgattgtcagcatcaccgtaggtgtcctcgtccagtaccaacttataCCGTCGGGATTTTGGgctgtggctatcggttacctcaccttcattgtggtcctgctcttttggcaaaac
>Skav232980
GCCATTTTGagacccagtggctcaccatttagtcccacggcgagctactaccggagcgacccacaacatgtttttgttccagagatcttccaacatatttgtgctgattgatcaggaacattgtcatccttctgattactcacggattatgataccagcaatagtctattgcagcaatagttgtcaaactGCCATTTTGatgagatatgagatcagctacttcaagtttgaggatctaagcgaaaatttgtggtcatgccatgattggcttgggtttggtcaagaaaacaggtggccagatggaatggcactgacatgctggtgaatatgttagtcactgttcgctgcccaagtttgcaaaagtgttcaagctttgcgactttgcggtgccagctgtgcatc
>Skav227457
GTAGCAAGAATGGTTCAAGaaacgcactgttgccttgctggatgtgtgagtaggtaaaggtagcagtgtaggtggtggttgtggtggtggttgatttcatggagctgtgtttgatcaattgggcattgtttcaccagtatctatccatcataaaccatatatagaaaccatatggaaaccattctataatcaccatggtggaatCCCTTTTGGTTCAtgtaaccatcattaacattcatcaactgtcaacctgacctgtcgcttttcgtcgc
>Skav213834
TTTGGCTGAAGgtggtgtcagtttggttgcccaatcctagacgatccgccctttagacgAGCCATTTTcaggtaggggatggtagggggcgttcagatgagttcagccacccaatgatatccaattatggagtatggaacatgtttcgaagtaaacctgggaatttagaaccaggataccaaaaagcatgtgcataacattgcacaactgggatattgtacatcccaatttacccctgggatctaagtgtagaactaggatattataatcattaacgccaaacaacccctgtaacttaacatcttacaaccatggttgatcatcgacatccacgagggcatatcgcgcc
>Skav225873
GCCTTTTGGCTCCAGtcgtgtgggtttttgtcgtcaaggaatcaatcgtaaggctgggatcagcgcgggcactgctgcagcagtgctccaaggGTAGTCATGTGGGTCTCAAaatgggctcacccctcaaatgatccagtttattaatcattaatcattcatcattgaaagtgataaagccaccatttgtagggttccgcattttaagaaaccccatatcagggcacagccctggaaatatcaccggtgaagccttgatgatcatggctttggggacgtcttgaagctgcaggaggcatcatccaatggcttgcatgcttgggaaacaatctatacgttggtatatccatggggcctaaaccatcagaaaccatcattttatggggatataccatggatataccatagaaaatgtttggaaaaccatcctttctagggt
>Skav225195
TAGACATTTTTGTTCActtgtgtggatatcccacgatgttttctgcacgacgacgttgctcactgctccacacattctgaccgtggacctgggtgacattactaccgtggacctgggtgacattactgtacttcttgccacttgtttataccgtattcactggttgttttacgttcccacctggaatccaaagccagaaaacaacatgagcatttcccaataccgtccaatatttcccccacatacaaagtggtagtatgaatcaatatgatcagcagtttgatgtttgctgcttgtttctacccacaaacgatggtagaatttgcgatcagcaccCCATTTTGGtggctgatggcactccagattttcaaggccacttttggtcggtgccaccagcgactcgagtgtttctagccgccac
>Skav216461
AGCCAATTTGGCattgcagctgtgtcttatttgttggagctgatccttatcagcacagatcgcatttcaacacctttggttggtaccgattatggttgagcaaaagttccacaatcgcctactatTTTTGGCTCAAGcagaagcatatcatactgggagaacaagttctcaaggtgacctgtgtcaatattgtgttagtttgacatcactcgacaaaattggaccaggaaattccacactgttgcctcttgatacttgtgccacatcttgaagcgcccacgcctgacttcgagactagcgcgatgacacccagagtcaagaactctttgttttttaccatcagggacagtccctattccgaggccgagaagttgatcaccgaatccaccctggcggcgttgaacacatgctataacctctcggaccagactacggttttctttgcggcggcccgccagacgggccaggactcacaggcgtcggcactatgccgc
>Skav200463
TAGCCTTTTGGtagttgaagagagctggctggcaaaatggccgttcccaataggtaaataatctacatctggtggattgtcgagccagctgattcagatttccacagggtatgtattctgtttatgccttttatatttcagggggctccttgagatattcggtacttcaagtgtagatttttggctggaaATTTCGGCTCAAaatgacagcttcagtcaagccgtggtgtttgaccctttgccccctggctgttgctgtttgattggtcttgtcaagggcaggacccgtgaggacccgataccgaatcgatttc
>Skav236429
AGCCATTTCGACTCtccgatgacccagtcagcattcagatcccagactcactgatggaacgtgtgcttcagacgggtaggatccatgttcaccaagccgtagttgacgccaccaatcctgtggtcatccgattggatgatcattcccttttgttgccagttgcatccgagtgtgcatccgagtccagtccatgggtcgtagagcaatttgcagggggagtaggaggttggcattcagcactttctatcattgctgctgtcgggggccctgacatgaaaattgtagcattggaatCCAATTTGGCTtttgcaacccagtatgccctttctcatcgtgtcaacctggtgggggatgttcatgac
>Skav214828
CCGTTTTGGCTtctgggaccaatgctcccagtgaaggcaatatggaaggcgtacacaatgcttacgaatcgtgaagagtacagattgagcatctggcaacaaccatccatggatggtcaatactgtaaccttatgcttgccaaagtgcttggtcatcccagcggtcacaattgttgagcacaattctttttgtaagcttggatagtagtgaacccatcccagcagttggactagttgctggtcgttcatgtgaacagccagggataccgggcccttgacccacgactggttggtggtttgattgacagtctgtattttccctagtaattcttaagaagtggttggttgactaaTAGGCATTGGGCTCAgttacctgcccgcggtgtgcctgtggatcaccgctcgatctcgaaactgcagcc
>Skav226144
TTTGGCTCAAGTTTTGGCTCAAtctttttggccctggagtcatgtgagac
>Skav224443
TTTGGGCTCAAGtttggCCGCAGCAATTTTGttcgaacagctacccttcggaaccatgacaacttccctg
>Skav220367
TGGCTCAAGCAATTTGGCTCggctagtgcttgatcagtgtggggatcacactatttgttgcactgctga
>Skav222026
GCAATCTTTGGCTCcgattttccaggtgaaaagccggcgcagatctCCGTAGTCACATAGGCTtcaccagcagcgcttgtggagccaaacaagccacagcacgtgacactggcgggcaaacatcagcaaagtcaacatgctcgcagcatgcatttgtacacgtggatcgatgcatcatgcatcatatatgcatcgtatatatgcatcattatgcatccatgtattcaatctatttttgtgggctctttgctacaccatgacccggcagtagagcg
>Skav216744
TGGCTCAAGaagagccaagaggagcattggcgagagctaccagagcccttcagagccaagagcgtccaaacaaccaatgtttggagacgcaagttgggtttgtctctgcggggtcgtcccattggcgggcatatcccactccagctgcagaaggagttggatgtattaatcggtgagtacgccatgggcgcaagcagcatctcagaacgtagagaaatcgtagctgttgaatcggtggtttctaggcatccaaatgttctacttgtttgtttctagtaaatatgtttgtgtgttggttttaatcttggaagcccaagtcaatcttcctggatgcggccctgaatcgcgcgaacacattgtagtgctcactgtagaacacttcaacttctatgtttgttttgcttcaagAGCACATTATTGGCCAAGgttgctacaattggtagcttggtggcagat
>Skav201306
CATTCAGGCTCAAagatctgcagttgattccagtttgggagttatttctgtatgaacttccttcgaggttCCCTTTTGGCTtttacacacaaacagccacaaaaacacttacgctctgcactccaactattttagagcaggtgcacgtccatccgttttagagtatgtacatacaCCATTTTGGagactgtacttcgagtatgcactactggagaggcagtccaagcgcagatctgagcc
>Skav213449
CGTAGCTACTGTGGCaggtggtggaggcccagtttttttttttctcggagttggatgtcaagaccgaagggacgaagagattggcattttgaagaccagtaggtccagtgactcttaactggaaaaggtgtgccacaaaacaaatccaagaaaacaatttgctggattttggaaaatgtgcgtttgttcaactcTAGCCATTTcagtcatttggaattgctcaccggcgttctgccgcttccattctgaacattgttcagctgcgtccg
>Skav233254
GCCACTTTGAGGTCAAcaactttgcagtggccaagaaacatgtcagtgatgcgaagagaggaactgtgctcaagaaggcggacttcgacaccaacacaaaggatGCCTTTGTGGCTCcttcggctctgactgtgttcacgggaagcgcccaatttccgacggctctgtgcagcatcgacctgtcggcctctaggccttccttggctcgtcagttgaaggaggctgtggtg
>Skav229272
CCGCACCAATTCGGCCAAGagtagtgacaagcataccatgcagaagaaccaaatttagttggtacacatttgatcataaatcaaaatcagggcttaaacattttcgatatggttgatattcatgtgataccctttgcgtctcttccagtcctgtagctttgcactgcggtaccaaagatttgatctgttaattgGTAGCTGCTTTTGGCTCAcagcagagctgattccgcctccactttgaaggcaatgcatttggcagtggcagttgtgtggcttttggacggtcagatcattccctcacaatcagagacagcaatcacggatcaagtggttgcagtattcagtttgcatgggttcaaactcgctgggagttcccaaagaccaatcagacggtcttccattttttggctttgtcattctgaatcattctcatcattctctttgattttctgtgctgaaa
>Skav225988
TAGCCACTTCTGTCCCAAtagtagggaccgatccgagaaattgtggccttcaacatgcttcaaacccattttttttgtgccaaacctgCCTTAGCCGACTTTGGtttggaccaactttggatattggtccaccaagttgtagggtttttcgtgtaatcaatgcaatcacttctcttcttcactaccactcgccattgtgaggtccttctgtctttggggcgcattgttcatcag
>Skav212492
TTGGCTCAAcatggaagcggaccaaggcttgagcaatgagttgtagcactagtcatatcttgagacaagcaacatcctggctgttcttgtaGTAGTCATTTTGGgaggacacagaacacttcaggaaacatcctagtttcgatcacttattgcagactggcatctggttctcttctttgtttttgggattgttatgactactcaaaaaggatgcaatctgtttgcttcttaaggttttgcttgggaccgttgtgggcgggtcacgagaacgccagcatagcgttcaacaatgtcacaatggtcgccacgggagtagcagtccactccaatctgattgtcccaatttgttttggccacaaaagtcacatcatctttagtcacggtcgaaaaaaggtgatgcagctgatccatcacgtttgcctatccatgatgcatccctgccttttcatcagacgccgaaagttggatcctcacagaacggtaccgcc
>Skav234958
TTGGGCTCAAGctgcagtttttttttctccagccacgcttctattattcccaccctgggttcgaaactgcatcgagttggggcggcattgtcacaggcaaggtgcaaccctgacacagtttcttccggcTGGCTCAAGtctggcccactggcccactacacaag
>Skav233383
TTTTGGATCAAaatatgtcctgtcaaggtgtttttttgtttttcggatttgcatgctttcactgtGCCAGTTTGGTCAggcggaacgcacaaaatccgcacgtgccagcagctcagagtagggcatacacctaccgtcacctaccgtcatggcacaaagaactcggccatcgctccagaaaaacatttgttctactgatctcgagaagaagtgttttttagctccgtgacatgttgaagatgttgaagcactgatagagtgcctgcacacatcacagaggtacgcgtgattttgcttgatcatgaaacaggagaatcgtgagacattcaactttgctttccttacaactcgaatcagttgaacgtttgctcagactcatcatttgtccttttgaccttggctcagaccacggcagggagtgtctcgcttggctagttgagccaaatatccagagaaatccggaatgactgtg
>Skav218950
CCTTGGACATTTTGTCTgttagctggctgcccttagatggcgccaCCATTTTGTCCAActctttaatactttgagttgcagtggggggaaaatgagactccagagccagcttgctggtgagccgaatgagccagcttgctggcatcagcacttgtcagagtcaccatttaatgttgattcggccgccgaattttccattcaagttttgacgatgtttcaaaagacaggaaacaacttggcatttgatgcaatttaattttgtagctggatttcattcactcaatgtcattgccaaataacaatagcagcaagtttgcgacacccaacctagcgaac
>Skav206771
TAGCCATCATCGCTCtggattaccagacgcgtgggtgaacaaccatcaaccatcaaccatcagccattcagcagggcctctacaatcgtgttgaatgctgaaggaagcgatgcctagtttgttcacacgcaacatgtttgttcaccatgtttccctaatgtgtgtgtgtgtgtgtgtctcaaaattggtgtgcccccaaatcatcgaatttcttgacgatttgtagaaagaaacgaaCCATTTTGGgatcccctatcttgacaaaaccgccaccgactactg
>Skav231341
GTAGCTCATGTTTGCCTggtttgattctcagtgcaatgcTTTGGCTCGAGttgcatcaagaatcaactcctaagagacttctcggctgataccactccatcattgtcaaactccttgctacaactgcttggtgaaccaacattcaactgaccatgattgaattgactattccccaggcaccctgcaagtgacaagatcccgcagaaaaccaacatggcatattttgctcgcctttctcagtgaaagtcaccaaaccttttgtgccgcc
>Skav216405
TAGCATTTTGGCgatattatatgtaatcgatgtgtcttaatCCATTCATTCGCTCAAGtTTTGGGCTCAAGttttgctttgccacaagcgcattatttaagactgttgcgggtgacacttcgca
>Skav208426
TTTTGACTCAAccggctgcaagttgaggtcaagactgccactgctcagcaaaacgcactacttctgcagcCCATTTTTCGCTCAAGaaaaagggggcgacgttcgtg
>Skav207132
GCCATTTTGacgtgcgtagcaatcagagctatcagatatggctgcatcccagtggtgcatcgttaaggtgccttccagaagatccctgctggtagcctgccgctgctccacgaggtgcttcctgatggaagtgtccatggatgatctaccgcggtttggtggcaggagaaggcacccaggcaccctgcgaacgacggtgtgagagtcgtttgttgaattgttggcacagctgtggttagcatttcgcatcatttcccacattttgccaggttgagatgagcaaatcgtttgGCCACTGTGCTCAAGtttttattttccaacgccgccacaagtgcggagagcctttcaattttggccgcgccgggagtggcaccg
>Skav235209
CCATTTTGGgggctccctatgttgagaaacccccatatatcaaccatgaaccatgatgaccatgatcctgaggtattgctactgccaatgattattggtgctgctattgttgaccatcatcatccaccaaaacagcactggatggccaccatcattataacatatgccaacaatagctatggtggccaactgtctagtcacataatgtcaatgaaactccccaaccagtagttgttgaaccactactgttggtcatcatcctccataatcattgatttagcattctagaggatgatgaaccattatcatccattatccattgtgatCCATAGGTATTTCGGCTCAgcctcccagtggctgccaggcttcaacaaatgagccagtgtcattcagcc
>Skav209502
AGCCATTTCTGGatttctGTTGCCATTCTCTGGGGCAAGcgttttgagaccttcgttgtcagtgttggactttgcaaacttgggtttcttcatttctgtgcggagctctgcatgatcgggctttgttgtgttggtctttgacttcggacgttgcgactcatcatcgttcttgcgtagtactggactactgggctcgttgccttccatcttcagtgccactcgatccgatcccttggtgccaatcgtggaccatcttcta
>Skav235919
GTAGTCCATATTTGCCTacgatggttaacgaaggaatcaatacttgttgacagtggttaacaatcaagaacaaccagctacattatggaaccaatcattttcgagaggggaggcagggcacttagaggagttgtttctttagcaatacccctgggtcatatggtctctggttcttccagggttgttgccactgctacacctattacagaagcagcatactataagggatgacgcagatgaccccttgaccgctcatgcgttgcaAGCCATCTTGGtcggcacactgcggacagccccaatgtgggg
>Skav204724
AGCCATTTGGACTggttgacttgggagccccgaggtccccaagctcagggaaagggcttcatttcaaatccacgaaaacaaaagcaggggtccagggatcccaacatccacgaaagcgacgattcgatcagggcagctgactatgggttacttttccctttgggactctctgggtgtgggatcgtgttgtgggggacgctgtgaggatccttgaaaacaggtggttcgctgctgcaaagTTTGGCTCAtagctttcggattcccgtttcaatggcatacaggg
>Skav207321
GTCGCTCATTTTGGGTCAggatggcatacagacgcctcaaagattggctaacactgcaaatcattttttgtatcctttggcaggcTTTGGGTCAAGaattgaatcatctcaggcccatgtagatggcagccctttcagactacgactgtcatcgcatgccgccgggcaaagaattctgaactgaccttcacccgtttttccgtggccaaagcttacatgttagatactgtcaggttattgtgacctttttgttatgtaaatcagtttgcttgcgtaatcttacgtagtttcgtcgccgctatcgagtgggaagactgttgaacagatgaaaccaagctgaaggtcctgaaggctttggacctgcaaatcaagtaatccc
>Skav224465
CATTTTGGTTCcgtgcaacttttattgacgcagatggatgcctagtgactttcccagagcaatgtcctaggaaagcaggctcatttggatgagggagcctagtcaactgagttcagtcagccacacaaaagttggtttggtgtttgctgagtgcgcatgccctttacagtgccaagtattctggtggatttgagtttcgcttagcggggtgttgcatggtgttaggataaggatacgcagggcccggatcattccgatgaaagacggtggcacaccggcggacacagggcctgggctgaccctcacagttcggtgttgcactgcctacatgtttccagcatttctcgagacctttgatctctgtgcgaagggtactgtgaacattttctcagtgTTGGCTCAAGacggggacgcatagataccgcaaaaggttgactcgtgcactcgccgaaatgacgacccaggagactcgaaacaccctgaagttcaccaag
>Skav226102
CATTTCTGGCTTCAAGgatccaaatcgattcaacagcaacatactcgtaatatcttgtaatcccctagcagtagaagcactcaaagcaatcttcggtgactactgctcgactttgCGTAGCTTCGTGGATCAAGgcccagcagcattcatatccgatgcttgcgctatctcccagaatgaaggtgttcatattgaaaagatgcctggatatacctgatcattagctgctagcctagtccgatctagtccgatttgtttttcccactcagtgcatgatgatcacggtgttagctccttcggtttcggaaaaatcggttcagttcttgccg
>Skav208807
TTGGCTCAActccgctttagttctgaggaaggccacgtacaattcatatcaatccaccacgaatcgaatgaataaacaataataatcactCCGTGGCCTTTTTGccctcggcagagcaccagaagtgcacatccacagactatgacatcagttgattggcagcagcgcattgcaggtttggcaagtccaacgaagctccaccaagacttaaagcctgctgaagttgagtttctgaagagagacctgagttaaaatggtttgactagttaatttctacgagacgagcccggcaggggtgagaactacgacagacaatgatgtattgcgttttgcatgctcgagtgtttgacataattggatcgagtgaaatcgtgcataaaatgcaagctactgtcatacagccaccgcatgcgtgacatattgcaagctttgtctcacgagtggtttcattctgcggtaggagtggccagcc
>Skav212290
CCATTTTGGCatATTTTGGCCCActttttgcgtttttgttctaggagaattacctgctctggagaaggggaactagttctacttggatgtttactgcttccatgaattggatgcggtatgtccatgcatgtccccaaactgggcaggagtggcgcaccatggcaccaatttagttcacccaataacgaaccgccacaaaccgcataaaatgccatgatattgttgaaaattgttgggatgctgcggcaaaacacttgcatccatctttgcgccaatttggagggcccactttgcggaatccaggctgaagggtaattgaattatttggggcagtagttgcgggatgatagatagagctaggttgttagatggctcggccaacaaacctggcccaactggtgggcaccaatgagccccagggtttctgggaagtgtttgtctctgagcgactgtagcagtgaccgcagtgtgacagcc
>Skav211798
CGTAGGTATTTTGccgggtaattactgaccaatagttggttcatcaaaatttttcgtaggggtggttcaaccaccagccagttgtcatcgctaaggaacctcatgctgctccactggaccaccggaatgctgcgcggccgcacggaaacacctgcgcccgtagcgccaccggtgccgctggcatcggcggcggcgtcgctggcggcgtcgccagggcctgcagaattcaggtcgttgaaggcagagatcggcagattgcaggagcggcgcccgggaagggattccgcatcaaggtgttgttattccaggtgttggctaatgactatattgagaactcCCGTAGCCATTTTGGTTTCAAGccttgttcacacagagttttcaagcgacctcttagt
>Skav219694
CCATGGCACATGTTGGCACAtgcaaactccgtactttcgttggaacgcaagtggtattttCCATGTTTGCTCActtggatgttggttagaaagtccgaaagcagtctacaggatcgagctgcgatagatctgacatttgttctcggtgggactagatcggtggagcaaaggaagacgggattcgcttggcccttccgtcagctgtcctttgcaaccatggagtccctccagc
>Skav215984
CCGGAGCCATTTAGGCCCAAGtctttttgctccaggtccccggcggccgacaacgcgacggtGCCATTTGTGCCTCGAGgtcgaaaacgtggacaaacg
>Skav229443
CGTCTCCATTTGGTGCTCAtGTTGCCATGTTGGgaaattccgattggtagatacccgcagcaccgtttgcggtttctgcattttgggccttttgggagtttaggggtgggtggaaggcctaaaaacgttcgatgctcttagactcttagacaatcccgaatgtttcagtggtagtgcgacgtatctccttatgatgactactttatgactgatgagctgaactttgaacccatcactcacgaagatcctcaattttgaacccgacatagccccacacaactcaaacatgttttttttttggatgattggcagcattcctgtgtgttttggaattgcactttgtacatttggcgtgtgccaa
>Skav201366
CCATTTTGTCTCcacctggatgcctaaacctgcgttactgactgagaatggtcccaacatctcccacgtgtcccacctgaagtagAGTCATTGTTGGCTtttcctgttggccaacatgtcattggcatccgcatttgttggttttgccatttgattcagatgtttgttgtcccaccccg
>Skav231755
GTAGACATTTTAGCctgttccaagattgacaattcttgaagaacatttcagccctttgggttagTTTGGCTCAAGcagaagtactgacattctggcgcaggttacacctgcgcaatccgtcagac
>Skav200911
CCGTGGCGCGATTTTGGtcgctaagtttcatccaaatctgaagattagtcaaaatattgaatagtgatcgaagtaataatgtttgatcaaatatttggtcgcttgctaatctgattatctacggtaaatttgttcatatgtgtgttttgaacatttcataacattgtacaaccatgtatgcgcaatctatttgcttccttgtgtagtgctctcacactggcactgctgttcacagagattctcggtgactcAGCAATTTTGGCTtcagcatttgcagctgcatctgcctttttacgctttccacacaag
>Skav218766
GTAGACACATTTGCCACAAGaggacaccgtagtgcctagttctgcacttttctgtggcagatgaaggcaatagtgagatagtgacgttgcttgtatgtgtgggcttcgcaaaatgtttggatgactgcccttagagaatgatcactgggttggcgagtgtggagAGCCTTTTGGGTCAAacctaggatcctggcgaaagaaaccactggaacaccatcagctgaattgaaagagaatgtgagcggccattctgctggtatcattgcaattcttgctggttgttgcaggttctatctctgttaattgttgcatagcattcacatggactttgtgttgcaatgcaaatgtcatcaaatgtccatgtaaacaagcctagctctccgttgtggc
>Skav221847
AGCGATGTTTGGTCAActcatgacccgtttggtagcgcatgcctgagtggcacaaagctagcgcacagtgagggaaaaacctgcagaaatcgtcctcttgcccgctgcattcgccaggtgagacctggtagcgatagcaatggatagcaacggtccccatgctggttgcaatgaccatggctttgtcatggagaagccaccggggggtagttattggtgatatatggtgatccgctactaccattttcacatcactagcagcttgttagtcagtagtttgatggtCATTTTTGTCAAGgtcagttgtagtatccatgaattagatctaaaggggtcaggctcgtcctttggtgaatcgactatgcttttttaaacttgtgcaactttggttcagggcccaggggcagtcaattggactgtcctttttcgtgggttttcactcatcgcttccc
>Skav232846
CCATCTTGGCCAAtttggctccaaagattctgggatcgttttgcaacatcctcatggccaacacttccatcgaagtgacccagtgcgccgccctccattttttgATTCTGGCTCAggtacgcgatgaagacaaggtccaaagttgacccagttgaggactggcttggggtggcttgagttgttgcaccgttcgtcaccatgttgcgcttatgtggctgagctatttttaaggttaatccggttcgtttgcccgccaatgtccgtatgtcaaaagtgaagccagtagttctcaaaacatctcacagtcttccagcgatatcctttgctaag
>Skav212213
AGCCATTATTGGttggttaatattgccCCATAGCCATATGGGCTCAgtgctggccaccaggaagggcgggaaagatgaagagacgactcgccgccgctaggcctgacccattgaagcaccagccagatgggtcaatggagtggacctgaatttccaagggtgaatcaggggacatcatgtccactgggcccaagacttcgcccttccgcagtgtgcttttagctggagcaacagtatccataaggacttttgggccttccaagatgaactcagtggagtgagatcaaaacaatggggtccaatggtccatgccagatggaagatttggccattctgccgtgtgcattctccg
>Skav205530
TTGGCTCAAGagccaagtctcaattCCATTTTGTCCAActcggtgtgttcagcctttgtgaaggccactgtgaccaccgatg
>Skav234230
GCAATTTTGGCaactaaaggagcaaactaaacccaatgctttgaggttaacaatgcgtcttaattttgtcatgttggaaaccgaacacaactcctgggatcgaccggcaCACTTTGGCTCAgctcgggcacctaccgagccct
>Skav219907
TAGTCCTTTTGGTCTCctgctgcttcgtctatttgtctcttagcttgcccataccgcttttttctcagtagagacccttctgcacagttgcttctgagccccttctattctgttttttcctttataatttcttttaggcctgcgtctctggctgctactctccggttttctcttgttcgtgacaggctttggtggggcagatcaaggcagcgaggcaggtgcttgttgttcaatctttgtcgataatcctgtcgtttcttttcttgaaactttggctgtggcaaaatgcttgacttcaagctcagagtgaggtttccacagcAGCAGTTTGGGCTCGAGgtatttgcattctgtcagaccatggcacaggttgagccaatgagggatggaagcatggtggacggcagaattgcgctgtcaacatctctttggcagactaacctggaa
>Skav223206
CCATTTTGGgggtcccctattttgagaaacacCCATATTGGTTCAgagttcagagatttatcatagtgcttcgatgtgctgtggttagccaacacgagtggttcagagcggttnnnnnnnnnnctgttcactatggtggagaagagttgtctttatggtaactatggtggttgactatggtttcactatggtggttcactatggtggagaaagtgaaaagtggttgactatcagagaaaattgataaatagcagcactgaaaactaactatcagttgatcgtcaagactaaatatgaattggttggttagagctggatttgataagaacccatgcatcaggttagaatccctagtaaagtgtgaaattgacgcaaaaaaacggctcaaagcgagggacgaccccagatgtttactcaaagttacagatgttagtgctgttgggtcg
>Skav222719
CATCTTTGGCTCAAagaggtcatgtttcctgtttccatgcgagctggtgattgcttgaggaagtatggacgacgaggtgatgcttcccggtgccaggtcgtgccactcttcaaatggagcagctttgacgggcgatagccttccagcaccgacaccagcaacccgtccagtgcttccacccagatctgtgaatcgaccgaatcgaccttcatccttcacggttgctgttcccaccgcgaactttGCCACTTTGGGTCtgcaattggactcgacagaacccagggcacccacaatactaggaatagaagcaggagcggtt
>Skav214169
CCATGTTTGGCTCtttgggaagtgttatcttgggcagtgacctcaagtgactcaagttcaactattgggatgggcagactcacatggtcccgaaactgtagtctaccatacagttctaaggatgagcccaatgtagcttgacctcaggagtctttgagaaaacaagctggagaaatcgatcatttgcgatggtaaaatgttcacacccgacttatgcaacttcgacggcaaaaaaggggtagacattgcggcaagtagactcattgaaggaaacatgacaagctatgaaagcattggaaggccagacagtttcaactaggtcagctcgatcccatgcaaagaagatttggtcaagtgatgtcaagtgtgtacAGCCAACTTGGCTCAAGagcctgggaatcccaccagcgctaccgatccatggtccatatcatttgacgcctggctgcctggctggctggcc
>Skav200922
ATGTTGGCTCAAtcgtttttgatcactaattattcgccatgagccatccctgtcagctctcattaggcactactaagttgaatagccatcattgagcatgagtagccatgattcactgtgtgTTTTGCTCAAGggtcgatcccttcaaggcttcagtttcactgcaagaa
>Skav215958
GCCATTTTGTCTgtcatttttttgtcattttgctggatttttgtcattttagctgtcgtgttttggttgtttttcccattttgttgggaaattgcagattgaaaataaaatggcaaaaacatgacaaaaaaatgacaaccaaaaacaaaatgacagacccaaatgacaaaaaaaatgacacatttatgacaaaataaatatttccagatttccaatgtttagctgcccaagattcttctaaacctagatcTTTGGGCTCAAGgtcaggtgccgagtgctcattgctgaactggggggaaccaatctcaaagggggccttgtgcctctggagagggagggacctcctaggaggggtgagtgctc
>Skav236186
CCATTTTTGCGCAAagtttaagaacactgtgatgataaggagtatcgtaatcgtcgtaatcgtaattgtgtcaaagagctggctcggtggaaagcgcatggtttggtttaagtggtggccttttgcaagtgccgttgagacGCAATGTTTGGCTCAAGaaatc
>Skav233927
TTTTGGCTCcacctgccttCCAGTTTGCCTCAtgtccggacctcagacctccgctgatcagcagttggtgctatagctgctatcactacagctgattgacgagagctgtagcgctgcattgtaaccccttcgccgccattgacccttccatctctgaccccatggcgggccccttgaaatctgatgctcagcagatgctccctgcttttggcgcagattgcccgctacca
>Skav202819
CCATCTTTGGTTCAcgacctgaacaagctgacatttgccgcaattggccttcagcggtgggctccctacatttgcccctgggccaaactggttggtggattgaaacattcctggctttgcctggtcttaacaaatgtttatttggttgacaggcatatatttttcatgcaggtggcccaaccaccaaccagaaaaccgtgcatcacagctgtagtttccagcagtgatcgctcgttgcagagcgtATTTTGTCTCAccctcagaggcacgaa
>Skav221153
GCCATTTCGGCcgcagcctgggccctccacagctgtttgtccaggaccttgactctttttgccatcccaatactggccacgaagtttccccatgattgttggctacccatcaaccatcatttagcccatgatctatggaataccccgcaaccatccagaatcTTTTGACTCAAaccacatgaaatcactggactgaccctgatttgccaagtgactccgacagaacc
>Skav210022
AGCCGTTTGGCACAAGctgccgacgaccttcccaaagttctatccgagactgcaattcacgctcccaaagacgcgactacttctacgacctgaagccaggtacttagctgactccgcagctgaaatgagaagcggcgatttgtgtaacggtagatccagttgatggtaaatcaccagctatggagaaaccaatggtggtttcttaatatggatctctcttttgcAGCGATTTTGGttgttaggttggttgttttttggcatgctgccacttgtgcagtgcaaaggacaggctcttagaccacagcgctcacgggggccaactggcgccagggcc
>Skav209541
CCATTTGGGCCCAtcatgtctgttgaatggattgtcgaaactacttcttttgagccaggcggaaacgcttgccgtagcaatcaagcaaccagggagtttgacagccgcagtcggaacgttgttgagtcatggttagtgctggttggtgatggacacttagttagcactgcaattagcaatcttgccgctaaggatattgttggcactggtTAGCTATTCTGGCTCAAGaagcttagtatccaagctgccaaggctctttttttaccattcccatggctgtcattgctcgtgctttggtgctcagctggctggccgcatggacttcagctgaaacggtgaaggattgcattgaaagccagtgtcgcggctgcggtggtgagcaatgtcagctctgccgtgaagacaagaacactatctccacatgcgtctcatcctgcatggacactctttgcaagggctgtgggggagagcagtgccagctgtgtcgagaag
>Skav220933
AGCCATGTTTGGtgtgcatcgcatcacttgccagaatgaaacatagaacccaccgtgatcaagctgtataggagccatgatctactaccatgtaatgtaacttgccatgatttgaatcatttatcatcattttctgtgcgatgtgcttctccAGCTGTTTTGGCTCAgtcgctcgttgcaaaaacc
>Skav236752
TGGCTCAAGcatttggtaggggaaatgagcaatgttgagcccaaagggcgttgggagccctggcttgagctggaAGCGATTTTGGaaagtcagtgacttgaaccgacaagacaataagcagcacatagcagcacctgctaacataggcttgcagagacaaacgcacgcagaaaaaatagaacaggcatgactagggggatggcaggcactgacgatcggggttgacttctgatgtcccttaggcacttgccaaaagtggcgaaggctcaaattcctcaaagtccatcaggttccgcaattcagttcttgcttttcaagtctcagctgtcatgattcatagtactgggagcagtggcacgttggaaagctacgttttgtttctatcgtggcctgcatatgcaCATTTCAGCTCAAGagttgcaatacgctgtaccaaattttagcctttccaggtgtg
>Skav218967
GTACGATGATGGCTCAAtgtctatcatgccaaaggactgaagacgactgcattcgttcgactcattgaatcttcactgtaagttgccctgcagcccattcctgtgtcttgctgcatgcacaactaagaatgtgttgattctgcttagttggcatttgattcttccctgattaaaatgcttcacacccaaaagcgaactcatccaatcacatgaggattgtcaacctGCCAATTTGGTCAcatcaggccacactgagaatctcttggcagatgatggactctggcagatttgccattgagaatctgttctttaggctagtgagat
>Skav216842
AGCCATGTTGGagcctcagaattcatggacgggaaatgcagctgtcgcattgggcttttgggaccagacgaggggctaaccaactttttgggagttttccttttaagatcactggccaacattgtgagagacagatcctgcgaccgtgataagtctcatgtgttgcatgaatgtcgttctccggccatgctGTAGCCATTTTGGCTaacaccgggtcctcagaggtaccttgctgcctttgccccgttgtacgcagg
>Skav222045
TTGGGCTCAAGcacatgttgcgttttgcctggacttgcagcaCGTACGCCATGTGGCTgtggttcattttcgtcacagctgcttgcagcaaggacttgaactgccaggacgggagctgcgaagatgatgcctttggacttcttcaatttcgctcagttccacccttgggatccttcggtccgtggtccttcggaggcatcgtccccggagatccgttgtacaagcacttggaaggggaagca
>Skav226283
CCGCGGCCTTTTCGGCACAAGatcaagTTTTGGGTCAAagttacccagttgcagag
>Skav215922
CCATAGCCATTTctgcacccaaaagtggcggttctgagcccccgacacggcggctcaattcctgcatggcggtgtcactgaggtgtgccacctcggtcgagtcggtggtcgccatccacagctccgttgatgtaaccgcatgtagcgccccgggtggttccccgcggggtttcacccatgaaaatcaggcattgatatggctctgggtcaatattgaccaaccaactaatggggaatttccaccaacaataatagggaaaacaatggttaacaggagggaactaggggtacggggttttgacccacagccatatccccagggctgctgaagaatggatgacccataccctatgcccaaagcccagtctgctcctctgCATTTTCGTCAAGttcgcgcggatcattgggttcagctgttctaccagccgaggtatgtagcgccatcaccagctttgccacagtcctgg
>Skav229520
TTGGCTCAAagagcttggtgctgggcaccagaggcttcatgacgaatctatgtctgtgaaaactacgcgtcattcaccgtttcacgtttttcatgtcctccagttgctggcgatcatcttcttcgcccaagtggatgctgagcgacccagaatttctcatcatgtcctgcagcttgatccagacatttctggagacttgtCCATTGCCATGTTGGtttctgaacatggcatttcctgttggaaaaatgggtgggtggcacggcacctatccattctgacaccaattgagcctggagcccccttagttggagtatcaaacaactcacgtttgtccaaGTAGTCATTGTGGCagacccgacatccccaacgaatcttgtagattttccagg
>Skav232528
AGCCATTGATGGCACAAtggtggggggttttCCATTTTGGgactcctagtgttgccaattggctatgaatgtaggtggcagatgctgttttcgatcagccatactttgggtgaccatctgttgccagcgtatgattcaccatggacctggagccccacggtcacgcagcttgatgtgtcaagaatgtaagcctagcaggcctaccatccacttgtgacattcagcagctgcgaatatggctgcc
>Skav209150
CCGTAGCGTTTTTtcttgaattacctcttttttttgaatatcacttatttttgaccaaggcctcggaaaatccttggctcatacctcggacacgttgtggctcctcatgtggacaggacccaagagtacttgatcagaagtataTGGCTCAAGttcgttgagacttcccgtctatcagacaaattctcagatttct
>Skav227216
CCTTAGCCATTTTGattgctgtacagaagtgttaggatgctagttgaaagcagcgctcattccagcgagacagaagaaacagacaaagaaagggagccgatagtgaccgtccgatgcaagggtggcagagcaagtttggtaattgggaattctttggggggattggcgagtttgtggggcaatgcgctggatgacatcaaaatgacatggacccattttgtgcgcttgacatcttaatgtagatcgagcaagtcaacagtgacgcgtgttttcttgatgtttctacgtggatgacattatcagtatgacgtggagcgtcttccaaaaccaacccctttgaactttgaagatatctctttcgacagcagtgacttcatggcatCGCAGGCATTTTAAAGCTCAAGcaccatcgcaccatcgcacctccatcctctctgcagc
>Skav205438
TTTGGCTCAcagttcaacggtgggggggccgccaccgacagaggacagccgagctggcggggtcacacggcaaatctctgtagccaagatggaggtatagctgagtgatgctggtggcggtgccaggtggtgttcaggcatgttgttgacctactggcatgaagacctgcgaaatgaatatagaccaggtatagctaaccagccatatgctgaaagtacggagcgatcagacttaaagtgtcatttgtacttggatacctggGCCATTTTGcggatgcgtggtttgagcatccactgacgattcatgtgctgttgttcttgtgggtagcccttgtgacctttggtttggtgctccaattcttatggatttgtgttgctagacattgtcactgctcctgggattgcacttcgaagactttttgaattgaatctgtgaaatcatccaattcattccacctgaatggcgttgccgttgttgtggccccttcaggagaaaagag
>Skav216160
AGCCTTTTATGGCTCAcatgctgacttttcttcaggaggtacctcatctaattcagtggcagaaaagtttcccatggtttcctgtaattattggttggatgctgagaatggtgagcaagggcagtttccactgcagaaacatggtggttcacaacaaccaatgtgaggccAGGCACTTTGGCCCAAactgagttcgag
>Skav221927
ATTTGGGTCTCAAGttgagcaaccaaaactgttTTTCGGCTCAAGatcaacgtgggccgcgcgttccccactcaagtggtctagagatctttcggaaggttgtctgaagaatgggcaacagcgatagcagctttgagtgtccaacttgcaatggccaaggcaccatcgagcggaattcgacaacagcaggagcaatttcaggtgca
>Skav222942
GCCATTTGCCTCCAAGgcttaccttgtccagtttcagtcgtgtggactttcgttcacaagtttccaaaagtttcctggatttcttaaaccctgagaatgctCGTAGCCAGTTTcgaaccaaaacctatcagaagaaaacggcgagtggtccaggtttgtgagtgctgttgtgttgaagagctcttcccaagactaaggccttggcacaacttgctgcaaagtttgggtgtgcggaaagtggggaagcgcttgcctcagggatacacgataagaatctgccatttgagttctccaattccaacttctgaattgatccctggaaatgccgctggccatgtcggat
>Skav229760
CATTTCTGGATCAActctcccgaatgatggggtgacagagaaacaactatgagtgtatggctgatggacagcaattcgtcctgaacacttgtgattttgatggttcaactcagtctctgtgaaagttatTTTTGGCCCAAagacgccgttacagacgaagactgacctttttgaagagtc
>Skav225269
TTTGGCTGAAGctgcaccaggcttcagtgaacttcatgatgcaacgacggtcctttgctccgggagaggggcttcatatgtctttggtgaaacgttaccttctggcagaggcctgggcttcgatgtgctgccagagttatgcaacttaatcacctcgagaactcttgcgattgctgacctcagtctcttatcacggctaggccttttgaacccttttgaattggaaagtctcatcagtctcatgtgcagcttCAGTTCGGCTCAAccgcggaagtagatcagcgaaacaaca
>Skav234214
TTTGGGCTCAAtccaggattgttccgcgccttcatcagcaccttcatcacctaagcatgccgcggaagcacatcacttggcattggagcatggatcagggcgatgcttcacttatggagatcaatttggacctgacccttgCATTTTGAATCAAcgaacatctcatgattatcaatgacagtgtccattgccatcaatgtccatgatgcactgccattgccatcaatgtcc
>Skav210289
GCTATTTTGGCACAtacccaggtgggagaagagtagttggtggttctaaaacgttttatgcttggttgattgactaacatctttcaaaggaactgaaaccagcagccactaaccatgaataagcatacaccagtatacatcaaaatgcTGGCTCAAGcgtagggactcagaactggcatcagtttgtatagttggcacaggccttcccaaagggagccctttcctcctgtgatgccaagttcggattcccaaaggccctgggatgctgcgtcccctgcgaaggcgactcccaagcagctgtgggcagtgtatgtgctgggactggtagccacgttcttcaccaacctggaagccgtacctcta
>Skav213237
CCATTTTGGgatgccgtgctccaggtggtgctggctgcgtctgtgtttttgacagccatgcgcgtgccagaatctcagcatcacttatcggtcctgtggccacagacaagcaacctggatctggctgacgtggttgatgtaatgtgctcactttggggccttggctcaAGCCATTTTttaggcagacaaaagggaacagagaatcggagcatcttttcctcagc
>Skav213569
GCCATGTTGCCTGAAGtcctcctggtgagattcggtgaagatcctttgaactcccagctgcatgatctatgaatcttcccatgctcttttctaATTTTGGCACAtgatttagattctgtgctccgcacaagaactcaagtcttatcttgcggtgctggtttggaaaaaatactttgaacttggagcttggTGGCTCAAGtgttgtgcacatgccgcagcttagcttgatgatcgtgggcttccttcagtttagttccgaacaatcgccccatttgcttctgaccttttggatcacttgttagattgccgcttgctgaagattga
>Skav222817
CCCTCGCCATTGCTGCTCAtgggattgcattgtatggaggtggctatgttccagtttgcgcatggcaggcttcctttgtttgtaaattcatggaaaagcggaattcaaagccaacagaggaaccaagtatgagtagtccaagagttctatgttggattgggtccatgttggacactcgacaaccagccagaaagcatgtggtgtgagatgcctcctgATTTTGGCTgcagctttgcaaacaatatgaacgggagccatgaaatttgccacttagcatgggacaaggaatggaagggtggcaatggctagtgtgaatatctgaatcttgtaaattcattgtttgaaatgtcgatgatgactgatacagactggtatggaccaagcaggtcctgtgatgataacatacaagtccctctcactgtccgctcttatctactttgagctactctaagcc
>Skav218777
GTAGCCGTTTTtcaggacaagcggaacctctacttgatcatggagatgtgttccggtggcggcctgtggagttcagatcgagctctcggcctgtggagtgctctctccgtgtggagctccttctgttcttcttgtgatcggcggtgactcaataggggaccccccaaatcatccagtacgaaccatttatagtcataaaccaacataaaccaaccattttgttgggaaaccatattttaagaatttttgagaacccaccatctgacagcatatcaacttcacctcccaaaaaagcgctgagcacgtcgcaagtcccacgtcttctcgtcgccacttcagtgatcgcagttccagcctggcagtgTTGGCTCAAGgctggcgcttcagg
>Skav213484
AGCCTTTTTGGgatgaaggaatcaaacacaacaatcatctgtttgtggttgatgagttgatgtgctgttttttgtcatttaattctttcagcaaacaacttgttgcatacattggctttgcatgttttgacctctacaaacatgttgcagtccgcaagtgaagaacacgaccccaagGTTGTCATTTTGGaaaacatgggtgacttcctcaccaggacgttggatgccctactgtagctgacctgccgataaaaaaccaccagctgcttacagcatgggaggattgaccccatagctgggagtaccattc
>Skav235994
CCGTAGCCATTGAGGTTCAAGattgTTTTGGCTCcgcttccttcaagcaacaccttctgagct
>Skav219769
TAGCCATTTATGGCTCAttcaacctttgtaggcccatTAGCCATTATGGCTttttgatccaaacatggttgtgacccaagcacttttctggcagattgcttcaattctcttggttgctcaaaaaaatggctcaaagaacaggcaagaaattcacattgccagaagccaaacaccatagacaagttgctatattggaaaactaacagcagctctacccttcaagttgagcacaccaatcaggagcagacttggtaacaaccaatgctagcttttaatggttcttcaaacaggaaatggctggacaaagctgacaatacacatggcaatgtccaaggcaaaggggtagacatgaagcaatgaatgatttcactgtcatgattgctaagctttggcttcttggagatacatccattcctgtgcagc
>Skav232129
CCATTTTGGgggcatttgtgcccacagaagaggacatccctattgatgttggagtgtatgacaaagaaatatcatgatcatcaatggttgaaccaatgccattgtttcaaatgccaggtgcaaaattgaacattgcaacagccagcgcaaagatgTGGCTCAAGttctgctcctgcaggtag
>Skav215836
TTTGGCTCAgatatccctgtacgtggCGTAGCCCTTCGGGCTCcgactcgctactggcactttttcaccacggctagggtcctctatccctctgcttcagatcctgaaagatcaatattgatggaactgcgcaatttcctagcagaacaagactgcccctattccatcaaggtgttcagtgtgggggccgaactcctcttcgaagtcccgcaaaacaaagggtggaatgcaacagaacgaatcgttcaggccattagcagagggcagcatggtatgactcacccacctcaatgtatttcgctactggcacggcactcatctgtcctcttgaatggggatattccacaggaaattacagaagttacagcagtgctgcttccctacaatgagcacagcactacggaagctaggcacttgcgcggggctgtcgagctgggc
>Skav223738
CATTGTGGTCAAGcagctggtgagcatatttggtaaccgtggttggcggctcttgttgaacaggttCATTGTGGTCAAGtagctggtgagcagtaaccatcaatgcaccatgcacagccgtcaacgactggatgatgttcactgcgagcagccacaccctatacgactcatcatcaaaccgtctcacaaatgaacctttgccaacatgatacaactatcctatagtgctggccaggaaaatca
>Skav202341
ATTTTGCCTGAAGtcgaaatcaaggcctgggtaggttacgcatccgaagcactgctttccaacatctCCGAAGCTCTTTTTGAGCTagcagatcatcagtttgtgcccactgatccaacatgtctcccagcagccacttcgttggaacaggtagccaggaaCCAGTTTGGCATCAttcaagtgggagaggagatcaaagctactcctccagag
>Skav203840
CCATGTTGACCCAAGtgcggggacgtgtgaagttggcccttcccaacatcgagtcagactttcacttgggtcaacttgggtcaatctggtagtgctggtgaatggagagaatgtttggttttgtaagttcgagattctcaagatgcatctggagtgccaatgaatagtggttgttttgtcatagttcgcattgaaagataatttagtttcatttgaggcttggcagggtcggtgatgaagatatgtttgcgcacaaatgtcactagcatttaacatttgaCATTTGGGCTCAAGccaaaatagccaggtaagggctatcggttgttgtctacaactgtctggtgtgttccagatttttttcttgggtgtctcccaagtgttccttggcc
>Skav233543
CCATTTTGGTTCtgacagctcaggatatcccctctgaggctgcgaggcagaactatgtttttttggccaacaaaaggtacccaacatttgtgacctatccccctattcgggcctacttcaaaccacaatgtactgatgtacgaagaatccgtccggtctgagttttcttgaatagaggttggtgacaaCCATAGCCATATTatccctggctgccatcgcatcaccggCAGTTTGGCTCAgcgatttctcagtgaagctcagctatcagcagtagttgag
>Skav207542
CCTTGGCCAATTGGGCTCcggcagcacaaatcacatcggtgatgagcctggtgagatgggtgagaatttgccacctgtagacttgggtgctggccgtacggcgaaacaagtttcagccggaggtgagcatacttgtgctgtgctggacgacggcatggtcaaatgttgggggtatggtggttatgGCCAATTGGGCCAAGgcctcacagatcatcaaatcggtgatatccctgacgag
>Skav205111
TTTTGGCACAAacaacacatgtttttaaaacatgaattttttcaacagatcgaaactccttcgagctgagtgtgtgagggttctcggatgagcactttaatcatatgttactCGTAACATTATGGCTCttagggttggtgtgggtgggttcctctttCATTGTGACTCAAtgcgagttgctttgtgaagggggtta
>Skav201121
GTACCAGTTTGGCactacatccgacacacctttctgcttgattgccaattctgaaaggcatttggtatgttgtgtggctatttgtttgaactggtacgttgagtttcccttgagactccattatgtcgcgtgcaagtgtatcacactggagcctcgcatcggaaaagaatagttgattgagttgcatgagttcaacatccaacacgcagaatgtggatggtcatcctccaagggAGCCATTGCTGGCTCAgctaccgttgcctgcctgtcatgtccatcacttcgttgggcttctgctgcttcg
>Skav221919
TGGCTCAAGgggagccagcgagctaagcacaaagtgctccaccaagtggccgcacgaagtgctcgaagtggtccaatgagggccacccaagccatCCATTTTGGgagctcccgatgttttgttctcgctgtgttgctgttggaggcacaaagtgtgccccttgagaagggatatacagcagcagtgacacgcttgcgtcgagatctgctgcaggactatgacaggctggtaccacccacgagcgaccgcttagtgaattattccaaagctgggactgacgtcact
>Skav220780
TTGGCTCAAGctgagcacttttgggattgtagctgtGTAGCAATTTAAGGTCAcc
>Skav219648
AGCCATATTTTGTTCAgctcatcgagccgtttgatttgcgccccagagagtccaggcctcatgcagctatacaaaatgtgcacacgcctattttagtacaagtgcttcaagaggcttcaagtattcactgaaaacaaagctggctgaactagcacaagtggcaaaccatgatcataggaacctggatgagtagaacccgcatgaaggtagaactgcaccgcatcctttggaaacctacacgtcttgtgggcagtccagccctgaggctcccggcattcaaacatgcgctggcatcatgcggtacaaagtacggattttaaatcgttacacaggagctaaatggagctaggacaccgaattttgtgaaacagtcataaagtctagcattgagatacaggcagttggagtagcctcgAGTCATTTTGCCTttgagatcaccttttgtacttttgagttttctgtttccagaactggatccagccaatgcaagtatcctccat
>Skav228517
AGCCATTTGGTTCGAAGaccctgggaaaacaaccatttatggtggattttCCGTTGCCATGTTAGTTCAccattggttctagctcatcaggtcatgccttccttcattcacattttcttcctcaaagtttacgggggagctcgaactatagctggtcatagtctaactatagctattaaccagctatagttcaccatgtttcaccattggttctagctcatcctagctggttacagcgtcatgaccagctcatcatctcctccaggaacgccttc
>Skav221067
GCCATTTTGcaaagacgaattctgacaataagatatttcgagttcaagtcatgacttcttgtgcgacctttgtttatacttccaggccgcgcaacgcaattgcacatgttgagtttcttttgcatgagcgcctggtgcactctatacagctagcctagattgcccgcagccatcctcaccggccaaagccttggagtgacttgcCCGTAGCCGTTTTGGGTCAAGcctcttgcagtctttgccagaccaagccttcaaagctccaatctgtgaaagatc
>Skav236586
TATCCTTTTGTCTTCAAGctgtaccgggccagtcagatcaatgctcagtacccgccacttcgttggtattgtctgtactgtccaatgaacaacaaacatcctgacctgccaattattcttccttgctatgcaacaatggccccaccatgatctgaaagagcgcatggattgcaaagtaaaatggggtcacctggagacaTAGACATTTGGCTtgctgattgcgcacaggctggggccacgagggtaaaatgctgagcatgtctacgttgagcccacgttgggtccctctctggtgtgattaagttttggacccgatttcggcgttcattctgggggttttcgcagtcagtgaagatttttcacgttgaaaaaagctgaaagcgatagctactgcagctactgagctgcgacctcgagctggttagctccgcaccttgcgggcagattggcagatccaag
>Skav208337
TTTTGGCCCAAtttttcgcggacaagatcggtttgatctgacccatgtgtttcacctgcagatagctcctgcgcaatttcaatccgtcagacatgagctgctgcacagagcagtgtgacatcgttgtggatggggAGCCACCTTGCTCAAtgcgattcgactcaggaccagagccaaccgaccttcccaactttgaagaaagctgtcgagacggagagcaaggtctcagtggg
>Skav209295
AGCCTGTCGGCTCAAagggggcctaccagtcgggcgggctggtgacggcaaacacccgagtctgttgCCGCACCATTGTTGGATCAcgcc
>Skav226079
ttttggctcAGGCATTTTGGCcttcaggcattcctaggattccgctgcagatatcaaccagaaaccaactctcccagaTTTTGGCTCA
>Skav209955
CGTAGTCATTTggagttgcatctgaatcctgtccttgttgcttcgctagccataatggtctgatcgtttcttcaggcagctcgctgagtgtggagggtttgacacatgacattccatgaccaagaacggtgtccattgcatccccgtCCTTGGCCAGTTTGGCTCGAGagtatttgtagtacaccccacagcatggatgcaaaacttccgcgcgtgaaagttgctttcgcctgtttggtagatgcaactcatttttacaccgtttgctcgctgtttagctatgctggtgtgctttgtgtcgacctcaactgggtcagtgaacgaaacgaagctggctatttggcaggctggctccagtcttcaaatgtcttcggccgtgtttta
>Skav203602
ATCTTGGCTCAgaacatggagcccgcgtattctcaggatgggtacctcagaattctcagaaaattgaacttagaacgtgaacatgaaccgaacacacgcacacacacacacagactggacgactccggtccataaagcccggccttttgaatcagacaggtgggctagcagtttctgagctccatgctttcgtatatcccaaaggatccaaaaggaagcagggaaatgggaaggttgctaagcaaggacggtatcaactattattgaacaaagtacgggattcctggacacttcagtgggatgggtgggcactctgcaatggccagatttcactTGGCTCAAGtggctcaagagatcaaattttgaatagaaattgttttcttcggactttgggcatccagcttcaTTGGCTCAAG
>Skav210764
CCGTTGGCAATATGGCTggggggggggggggggggggggggtcgcctgcatcaggtatccgttttatcaacccattCCGTCGCCATTccactgtcatttagccaatgatttcgccatgttaccacaatttgaccatcatttcacccatcaatttgcgctaagtcaccaaattcaccaatttcaccagggtgctctcatttcacccatttcaccaacccaaccagtttttggttgtgcccctagtgttactctgattctgattagatcccaagttttctcacaaatcgatttatGCCACGTTTGGCTCAAGcactccagtttgctgcaaagaccaaagaattccaccccttcgacccggcaatgctcagc
>Skav210058
CGTAGCCATgcccctgctgtaagtggcatcccaccatggtaaaaagtcatcagtttgatggtggagagttaccaccattcctggctaaactgacgaaactcataaagatgggagcctttggtcggcacaaacctttcattggcacaAGCCTTTCATTGGCACAAGttggtagagcctcggagcggacgtgcagcaatggaggtttgctccgccctgtctggccagagactggccatgcttgagacagacaagttcgaaggccaatcagcaaaagaagtgaagcacttgttagcggcgaacataggggtttccagattcagacagaaactactttcggagaatggtgcctgcaagattgttgatgatgaagtcttcacccatccagtgaaagtgctgctgatcgtg
>Skav204444
GTAGCAATTTTaacccccaataatagctaatgatagacctaagaagtgtcaccactaatgttgaagcattgatgggtaaccaaGTAGCAATTTTaacccccaataatagctaatgataggggataacaaccaacagtaatggttaaacaactactcttgggactgatgggactgatgggttgtggttcaaacatttctatttttccaagtaatcattaacaaatggttggttgactcatatacttcataggggttgaaaccaagcctgggcccaaggtcctaccagctttggtcaggctgttctcactgatcccttggggggacgcgtgcc
>Skav225679
CCATAGCCATATATAGCTggtatatcccccatgattgttacttattataccctattattaaccattaaccagctattattggaacccccccaccagttggttggttaactgcttgacCCATAGCCATATTGttggtatatatatatatcccctatatagttgttagttatcatcccctatcattaaccattataaccagctagcttaccatgagttggttgcttaatatcgacccatagccatatattgttacttaatatgccccactattatctattaccattgaccaactagttagccatgcttgttggccatattgcccatattttcccaggcccgttgttgg
>Skav209985
CCATAGCCATGTTGGaacataatcagcggcatgattgaccaacagtttctggaatccttgtcacaaagagcagtgtatagcatggcaaattggtcagtccttgtcattcccaagaggtaaaccatccacagattgtggatttgccatggccatgttcttcccagagggcactatttagtgcacatgttgttttttgatgtattttgaaCGTGGCTATTTTGtagaattttattggcgtaaacattgcatgttacaatttcggataacaaataggtcagcatgttggataaaggcagggccaaccctctgagatgccctggcaaaaaa
>Skav233064
TTTTGGCTCAgtCCATTTTGGatttttcggcaccacgagtcccacgttttccctacgtgtctcgcagtgagt
>Skav223747
CGTAGCACCTTGGCTactgtATCTGGGCTCAAGccctgctccgaagctttgccagcgagca
>Skav202381
TGGCTCAAGccTTTGGCTCAAGtcattctggttgcgagacccgacaagggtagaattttgttaattcaccccgctttgaacttc
>Skav230901
TTTTCGCTCAAGctttttgtccgacctgtgacttttgggacaatggcgaaccaagacccttctcctttgaatttgccatcttctggagaaccggttgtagatgagccttcttcatctaccgtccatgacccttcattgaaacctttgttacaagCCGTTGCTTCTTTGGCTggtggctctgatgagacaacggcgccctttcagtgtgacccacgagacactgaagttggtgttatggagatgccacggggaagacct
>Skav201802
AGCCATTGTTGGgcatcccaatatgaagtttgcaaactgttgtgtctcttactcttgtgttccatccaatcctatttgtctgtgctgcaccttcacagtttgcaaatctctcctgccagtctctagttcaggtctgggtgcttgaaggacttgttgagcaggtgccccttctctgtcttcctggatctcatgagcgagtgctgcttcggacatcggcatgcattgaacatagaacattattacaTAGCATCCTGGCCCAAGcactttcagagagctggctatgtgttctctgcctcccctagaggagcacaacc
>Skav218992
CATCATGGCTCAAccctgaccgccgttgaactcttggctaTTTGGCTCAgcatttctgca
>Skav229287
CATTTTGGCTtctggctgtcagcgatccagctgtcttcgcaacttagccaccacaacttcaaaaacaattccagaggatttctctgtgtaaggatggagttgcgtgtcctctttacattgagtttcgccagggtgtttttttgacacaaggtcaccaggtgtATTTTGGTCTGAAGcaatgggtcatcctatggagtcatccaatggagtcatgaaaaattgagttatcctgtgagtcctctgagtgatcctctgagtttttgatttttcgttgtcagatttggtctg
>Skav216440
TTGGCTCAAcagcaaaattcgagttgcatggcacatgagaattcaacagtatatggcatgtgaagaactcaaacgcagaagtctttacaaagccgtgaaacatagatgatgtcatcatatcacaccttcaggttttgaaaacccttttatattgaatattgaagcaacaaagtgcccttgtgcgcacttgcagtcttgcccacaacttgcaccgcatgaaactgcctccagcccgcccagaattgcataagtgcctgcagcccacccagaattgcatgtCGAAGTCATTTTGGagcgagttgatggctgctaagccataaaatctgacatcttgacatctaaatcctgaggaaaaatcatcaaccatttgattccatcaactcataaaccagctgtggccagcatcagcatcttacatcaaccatggttgacagccagcagggggcccccatccatggctaagacatcatcagacctggccc
>Skav228283
AGCCATTTGGGaggttccctattttgagaaacacccatatggtctattatcagcaatacgactgtgggtcagttcacccttagtcccccctggttcccccatgatgaaccgttgttttccttatgattgttgatgattatcccccattcgttggttaagattgacCCATAGCCATATATAGCTggtataccccctattattgttggtgatcatcccttatcatcaaccattaagcagctattattaaccattgttgcatggtgaatattgacccatagccatatagtaaaagaaatcatcataattaatatggatatatactgtactatataactacataactatgatcattggtatattaccattaataatctatggtaaataacttcataacggcacaatcgcgctgatagg
>Skav203299
TTTTGGTCAAGattgcttgggaatttggcgttgcacttggtcgcaactctgtggaaaggccctggcaacctgaagagtggcgatggcctcctcaaggcaaagtgatggcgtttttcttgggaattggcctgggttgtgcaatggcatgcgctaggtgtcttagagggagattggatagatgagtcgaaagtcgaacggaccacgaaatggtattcttgattttgatcctgttctgtaggcatcttcagctgtaactcatgacatgtttgcggcattgggatgacggtcgataacttcggacctaagaaaatgacaggaacatgatgagcatgatgagcatgatgagaatgatgagtgtgatgagcgtgatgagcatgatgaacggaagttgacgacatggaacagagggcatggtcttgTTTTGGCTCAggcgtttggcacttgcatcggttgcaagagcttggatagcgtatccagaaactagtctcttcgagcc
>Skav205362
GCTACTTTGGCTCAAGtagccagcttttagatgccaaggatggctgatttcttagtaacaagtgtcaagtactacgttctcagcaagagcaacggcaaggttggcaaggcactggaggCCGTAGCCAcaagtgcaggtgcaacttcaaaggagcatcaaagcacagcttccaaagcgaaggccaaggcagttactgaagaggagaacggtaacgacgattgcttctcaaggaatcagaaggaactccaggacccacttgctcaagccggactcaaaaggtgttcaacagttttctgtccgtaaagggtgtaagagagcagtttcgagtctgatatgtatactctacactgatagatgtatgatatatcatgatacttatccatatgatgtagaatgatatgcacacacacacacgtgtacatatatatatatatatatgattatatagtttgtattgtatggtcttttggaatggtatggattgatttgt
>Skav220095
GCTATTTTGGGCTAAGttgAGCCATTTTtgagcccatgctgagccgagactggcacgcgttgagccttatattaagcacttgattggaccattttctatcctagagccaaaccctccaagctaaagcttactatctaatgcatttactagcggttcatgcgtgccaacaaagcacgcctcggcaccttctgtgcgggaagattttgccaacgttgtatccttttagtgtgagtccagtgttttcctctcgaagtctctggcactgcgcaggtcctt
>Skav232170
AGCCATTTTctgaggtattggctcccacttgacgtgacattggttccccagctgcatctcacagaatttgaacagtttcactttggccgttttctgggcacgcatggcacggtagaacaaacaatattgctgtaaacttttgacatctaatatcatttatataaccatgtcaccatccactgacaacagtctggggtcaattcaaatgattatatatcaggatatgccagtcttgttcaaactggatgctgatttccaatcaatcatgtgatttgataaatcaaatcaatggatatatatatatgtttcaacgtcccggtgattaagattcataaacctgtacttgtttcgaTAGCTTTTTGGCTTCAAGtcttga
>Skav214276
TAGCCAGGTTGGCcatttggggagaAGGCATTTTGGCTCcacttgcccgcaggttgcctgcagcctacggttgtaggtaccgacggagtcgtgacatgtcctttcaacaagcc
>Skav217797
CGGACCCATTTTGACTtggtaagatcgctgctattagagcgaaagaattgcagctgaatgcggtggagtgatcgacttgggcaccggactCCTTTTTGGCTCAgagttggctcgattgacatctcaccacttgggtacttgcgatc
>Skav230797
GTAGCCTTTTTataagcagtccaaaatagttacaacagcctcttgactgttgaggacgtgccaatccaaggtaaaacccataacaaccacaaataggcagcaacagggacgatatatccagcaagcagtaacaagactattaccaatatatgtaacctaatatattttcggatatagaaatgagtcggtgaggggaatcgaataagacgatgctatagcaccaagtggatgCCTTAGCTTTTGGGCTCAAatgcaagccttgatgccgggattcgtcccgtgattgtaagaccgggaaaagcccgtggagggtgtttcccacctcctg
>Skav221724
CCGTAGCGTTTTTtcttgaattacctcttttttttgaatatcacttatttttgaccaaggcctcggaaaatccttggctcatacctcggacacgttgtggctcctcatgtggacaggacccaagagtacttgatcagaagtataTGGCTCAAGttcgttgagacttcccgtctatcagacaaattctcagatttct
>Skav206795
CCATCTTGGCCAAtcggcgagcggtggatgggcccagctgggtgaaatggttctcgcccttcaactcgggcaccatcaacaatcagtggactctcggagacagggcctggtggcggtgggggcgcaacatctagctgctggaaaggggcccggctggaaaccaagccgtagaatcagtaggtgaacctggagctgaaaTGGCTCAAGaTGGCTCAAGtctcgggttttgttatgttgttgtccgtcaCATTTTGGCgtgcacgcgccaacc
>Skav217087
CCGCAGCCATTTcccaaccaatcaaccaatcaaccaaccataaatgaagcaagaattctagctataaccaatcactcaaccaatcaaccaatcaatcaaccagccctcccaactaacaattacttcgatccaaccaatcaatcatccagtaaatggatctaacccaagcaactatccaaccaaccaatcatccagtaaatggatctaacccaagcaactaaccaatcaaccaacgaactggccagtccatttaccaacaatttggttccaccatctaaccatctaaccatccacttcaaccaaccaaccaaccaactaaccgactataaccaacccatggacctcccccagcggcatccccggCGTGCCATCTTTGGCcccgcgaggccagcgcctagggctcctggcctacgacgtggcggccacccgcgacgaggtgcgcttgatcctcagcggcgtctcgccgctgctggcggaggtc
>Skav210156
GTGGCCAATTTGGATCAAGgctttctgtattgaaagaaaaccctgcaatagacaacacagccagatgcagcttgggaacataaggaccttgactttttctgcagttattttcagcgtcatagcctgaacggttgggtggatgtaaagtgtgagtacagagaacgatccatgccaagttccaatgagagcaaggacacgagcagaacagttgctccaatgcatcatttcttgactgccctatcatgggttggtactacacgccgtaagctgcttctctcttgaaccaacatacaatcccAGCCATTTTcttcgacaatgacaatcattggaagca
>Skav235721
CGTGGCAATTTTGagggtgttcatactggaaactcgcgaagttcggttaaatgaaaggccacacaccttggttgttccagtttcttgcgagttgcagaccaggcatgagcagacatccttgcacTTTTGGCTCAcagcatggatcggacagcagtgtttccacaaaacaagtcagaagggagtaccaagcacatgtgggagcattcacactcatggtttgtatcaaggctatcactttcaggcccagttcgtgcaagtttgtgccgagagattgtgcctttcagaa
>Skav226480
ccaatTTGGCTCAAgcttggctcaactccacggagtgagccgagaccaaacccatgctccaatgaagctttcgccatggccgtggctttgctggtgcctgttcccggtgggtcatggcctggtgctgcttggggaatctcacctggtgcctgcgagcagcgtggcggaagatgtcgggactgcactggtggccctggcgccggtgggaaaagtcatcgcggtcacagcctccctggggctgtggctgttgttggtcggattttgcgcccttggtgtgccaaagaaagcgccacagcactatagtgtgaaggatggctgctcggatacatgggtagtcttCCAATTTGGCTCAAG
>symbB.v1.2.037781.t1
CATTTTGGCatggcgacatgtctcaacgaatttgtgaattgTTTTGCGCTCAAtggcggctgaatcgcttgcaacatgcgttagaaagatgcagcaaaaaacatgggattatttgttttgttgctcttgtgaatgaatgttctggtaaaagcaattgtttcaatcctgaatgtggtgaaattgtttggcaacaacaacgaccacaacaagaaccaaaacaagaacagaaacacatatctacgaattttgtgttccacaatcgcgaaggcgccatgagaatgggaggtccaactcgttttgccataaacatatgtttggctatcggtgcgattttgtttgcctggtgg
>symbB.v1.2.011412.t1
CATTGTTGGCTTCAAttttcaggttcagaaaagctttggcaaacagttaaagcagttggccaagcgagagttgagagcagtcgttcgagatcgcaccactctggctgtgaggcagggacctaattcaatgaccaagaaaatccagttggcaaaaaagtgcaaatatatacgatgtatatccgtgttatatggtaacaatatacactaagactacgtatatagatcaaagatattgtcaaagcaaaacatggtaataataacagaatctaagataattttagtctaatctaagtttggtcagctgagcttttgcagcttgcagggtttgcctctcagtggttttgaccttCCTTTTTGGCTtggtctttcagggcgtgggccaagggctgagaatacgactggatcctgctggaaattcgcggaaaatgtggaaaaaatcaggtcgaaCCATTTTGGagaccaaagaccagaatatctttgaccag
>symbB.v1.2.038218.t1
CGTGCCAGTTCGGCTtatgtttttttccaaacaacttttatGTAGCCCATTTTtggatagaagatgaatcagatgatagaagcaattgtcagtagttcactgtttgcctgttcag
>symbB.v1.2.026948.t1
TTTTGGCTGAAGcttccagtaaaacaaattgcaccaggatggaaatgtacgagtgatgctacaaagatgttccgcttccgttgaagtttagcctttcagaatttgatgtaaacaagatgattcagcttctcaagacagtttgctggcatctggcactctcaagaatagcattgaacatcgactgacttcaaagcgctccaactcgCATTTTGGCatcttggttgcaaactgccaccgctgaaattcttacatcatgaatcatatatgaacaaatatcaggaatctcatgtctcaagccaactgtgaatgcagcaaatctcacaaaccaccatcaagagatcgggcctttcggatcatgcagaaagtggttgcaacaaatatgaggattctgtgatcccgtgatacctctgatatctccaattgcctccacttcacttaggtcgtcaag
>symbB.v1.2.009035.t1
TGGCTCAAGcgcagaaggagaaaatgtccaaacgtttggatctcgaaaacgactgaaaatttcccatttgatatgaagatgatatgatttgtctctggcttatatcttgttgattcttgttgtctttaagcactttcTATCCATTTGGCCAAGgggtgatcaggcgctgtaggctgggagcctgaaggtgttttcagcttcagactttatcctttttgcgtcacagcagaggctacgcgctggcctcttgattgctagtcaggagcttggagcacaactgtcacgccgtaattctgatggatatctttgtgccgatctttaaccgcggttagcagtacttgaaagtgccaaaacatcaaattggacatcgtggtcaaattggaacactcgtccttcccgcggttggcattgggagcttgccgaggtactctc
>symbB.v1.2.021255.t1
ATTTTGGCTTAAaCCATATTTGGTGCAAGatgtttcaacaaactctacatgtcatattcggacttttctgatttgagtagccttcgctcccatcttctcgtccg
>symbB.v1.2.007159.t1
CCATTTTGACTactatttttcaaaagggttggttcaaccaccaactaggttaaaatgaaaacatgtgcccacctcaaacctgatggagaaaaaacaacctcatccccactactaccccgctttttgaggcctaaggtggagtttgtttgctatgctggtttaaaagtggcataacgccacgcgtgaaatccaacgaatttatGTGGGCATTTTGGaggaactccacggggtggctttcttgaggagttggtaggcatggtatttccgaggctttttggagttcagacacattgttcagaacagtttcgcgcgacttcggaacttggcagtttttttttaaaaagatcttagtacttatagtttatagtagttctgtttttacagagttgccttggagcg
>symbB.v1.2.037221.t1
TAGCAATTTTGcaacaaagagattgtgagctctttgaaagttgtcagtgcaaagggggatgtactcttcttttggcacatgaaaaacgggagatgaattgcttcttgttgcctgttcttgctcattacatgtttctttctcgactcttagagattttcattgcgtttcacatggcatatgCATTCTTGGCTGAAGagctttacgtgtcatcttcctgctgagg
>symbB.v1.2.011523.t1
CGTAGCATGTTGACTtgtcactgttgttgattgatgatggaacattgctgcaagacagctgggctctcagggaaatgccaacgattgcgacaatactttcaagCATTTTGGCcggaagcaaccgttgccacatgactgctttttgccaggctttttgaatctcaacaacc
>symbB.v1.2.004570.t1
TTTTGGTTCAAttgttccatcatgtagatggctaacaagagactttcggggccacaaagttgtgcactattttttgtgaactGCTAATTTGGCTGCAAGaatttcacgattcaatcgaacttctcgtggaagatttttttcccccaacaggatccaaaaacctttatttccagagagaagtcaacagttgtttcatcaagattttcagatagaaccatgatgcatgaaaaaaatcatgtcatgattcctaaaatatcaacagaagcccatctttttcaagacatacatcatacatccatcatttcgacatatatgtgcaaccaacctttaccaacacgtaagcctaggggttgggtcgcttctccgccttttcatggcggtgtagagttgatgattcgacccttcgaaaatcgaccttgacgaacg
>symbB.v1.2.019331.t1
CGTCGGCAGATTTGCTCAAaacttcatgcatgcacagtcacaaatttcctgaaggacttttgtggggagaccttaaacaagcatttatagatcaaaccttgatgtgattgtttcaaaagtcgccgattcgtgattttccctgtgtagcgagtgctggcagggctgtgtaggcgcaccagtgcataatcccaaaagacatctccatcatctccatgcaacgccgtttgccgtcgctgtcaccacggcggtatgcatagacctcatgccacaccagctccatgatgtgaaacatccataatttttgTTGGCTCAAGggcgtcctgccaca
>symbB.v1.2.037071.t1
CATTTTGAGCTCtttgtgtaacatcttnatcttcttttcattgtttgagaacgcctcgtgcagcctttaagagctttggcaggaagcttctagaagaagcctgaaaccaatggcagcttccgtagctcaaacacactagcttgatctagcttgcgtagctcggcagggttttcctgctgttaatgactgcaaactgtccgtgaccttgcaccctttccaatttaggtactggtgttgcatggtgtcgccctgtccctgtacagatgggcgttgacagtcacaagataatgagtgttcacgagcgttgtatttagagcaaacaaaatcatgccgcctgcatgaggaagaatctattttcagtgttcagattgtttgcgtgggatgtgtttagagcagaaatatgtttgcaagcTTTTGGCTCAAccgcttggttactactgtatcaggggacgtcctgttttgtcccctaagac
>symbB.v1.2.022181.t1
CATTTTCGCCCAAactggggcccagcgagttactaagatttttttggactcctataatggcattgaacctcgaccaatggtttctgtttgtagcctcagatttatttttacgattgATTTTGGATAAAGttggaacacggagaacaggcatccttgagactgaagcctgaaatttccagtctttagcatttggctggccggtagcggctgatggaactaacagaggagaacatgatcatgtacagttgcgaattgacatgtgcacgttcggctttttcaagtctctgagaagcacacacttacacaaccacagg
>symbB.v1.2.026705.t1
CGTAGCCAAATTGCCACAgCATTTTGCTCGAGctgcaagcagcttccaatttaagtccacagatgctaatctgttttagtcaatgcagcatgtcaaagtgtcattttttttttgagactcgtcagcctgattattttgagatatatgtactatataacttaccatttttacatttgacatccttcaacaatgcttgtggggtagaccccattgc
>symbB.v1.2.013201.t1
ATTGTTGGTCTCAAGtaatatgtcAGCAATTTTGACTacatggttagaaagtttgtcataggtaacaacaggaccccacatgaacggttcgtttggcaagagcttcaccctttagagttactttgcacattccctcgcctgtttctcgtggagctgcttggattgcatcgccaagcatgattcagatccaaaaattacatcccatactcgtacattcccaatagagtaactgtacacaactattgttgaaactattcatttcctatatgtttcaggtaattttcctggatttttcgtttggaattgtacattccctcccgatgcaactgccgaactgccctagggctc
>symbB.v1.2.013681.t1
CCATTTTGTGCTCAAGGTGGCAACTTTGCTCAAagatttcacaatctatgaatatttgcagcactcccaagtgactttagcactcccatgtgtttgatgatcagcaattctacgaaatgtggaagatgtgatgctgctcaattgtagcggccgtgaatggaaactccaacctgcagccttagctccttcaacttcagaccaactaggatgaactgccaagtgtttacggaaattacggaaattgactagacagaagcgctggcctgtgtccatggtatcaaagaggtgtgtgggttgtcggtttcaacacaacccgagttcatagctagacagtgtgtgtttgttgcaggcccaacgtggcttga
>symbB.v1.2.031129.t1
CCGGTGCTCATTTTGCTGAAaccaggtacattaattttgcaaacaccaacccctactgcacatgcaagatgatacaacaaaggattgaaaggtgcaaaggccaaattGTAGCCAGTTTttcaatttactcagctcttcttaggtcgacctggagatcaagttgtcatttgcattcatttactgtataagttacaagagctcaaagattcacagcacactttgtttgcccagat
>symbB.v1.2.022052.t1
TTTTGGCTCttcaaaagtttcagcgccagaagtgccgctggtaaaaaagcgagcgctgcttcccttgccgagCCGAGCCTTCTTGGATCAtgcagtagcttagtcacgctgtcattgtcttggatgctgaaattgccagctttgcgaacctatcgacgttacc
>symbB.v1.2.028262.t1
AGCTTTTTTGGGGTCAAGgaccaagtattaagttttctagtttatacagattcagaaggcaaatccagtatcagccaaCCATTTTTGCTgatgtgtttggtatatgtggttcaagaagtttacactgcaacattgttcagactttatcttggccgtccccatgtactgtcgctcttggcgctg
>symbB.v1.2.007816.t1
TTTTGGCCAAGggAGCCATTTTCACTCggtggtggtttcagatattttttattttgaccccgatccttagggaaatgatgaaatttgacgagcatatgtttccaattagtggtttaaccaccaaatagtttttttttgcatcgttttttgttcgtcgatttggaaagatcaatcaatgcacactgagatttctgtgtatttctagggaaacatccatatgactacacagtaccacatttaataaacctatatactcgtcacggattatgagcgggcttgacaaaagattatgttttttttccggactccggacccaattttcttaacattaccactgcattttgaaaaccatgcttcttttggcacatctccagattgattccccaagtgcgtgggcaggtcagttggaagtggtg
>symbB.v1.2.021347.t1
cgtagacattttgGTAGCCTTTTGCTCAAatattttattgaccctcccacccacacccacgcacgtacgaacaccccccctctccaccctctctcctttcctctgtattctgcaccttcatatcatgtacctcatttccctgttttggggttgggcagatagttcttaccccaaacagatcgaagatcacacagatggtgatacaattgactcagatacagatccatccgtagagatgagatcacaaatggaccacgaacagcacatgaaacttgtgcagaacgacccaacctaagcagaggaaacaggagagaaaaaaaagtgcgctgcgctacgttctgcacgctgagcaagctttgctcgaattgtgattgaatgggtgattgttcttgtatctctttgtcgtggatgtggtcaggaccgtccccaaatCGTAGACATTTTGG
>symbB.v1.2.010919.t1
GTATCACATGTTTGCTCAtttctaaatccaaccaaatcacgtttttctacaggaagacgttgtttattctttgccaagttccaattttgggacgagtgggacgtgcaaaaaagaaatgcccctcccgaaaaattcaaaaaacatgtccccgcttcagagagttgttttgaaatgttttgaacaagtttgatcatgttttatccttccatgaagcatcccaatgaGTATCCATTGTGGACAAGattttcacgcctgtgcaatgccgaggtgaagagatcgcagcc
>symbB.v1.2.008569.t1
GCCATTTTGGCCCAcgttgtgttgctactgagatttgaaAGCCTTTTTGCTCttcctctattgtctgtgatagccatgtcctgcagacgttacacatgatatttactgcgcgtggtatcgcctcagtatacaaccttgtgtgcttagacgtgatgggctaatgtaccattgcgattaccgttgacacatgatttcacgtctaccttacacaacaaagctttggtgagatgaaagaaggaactgtgaccaaccacctgtacctgcaagaaacgatgttctctgctcttgcaggaaatctgtggacgcctaatgaattttttgcacggtacatgaaatctgataatgtgtgtgttttgactttcttgcatccttccttcttggagcttctctttgcgctaggca
>symbB.v1.2.031623.t1
GCCACTTTGGCgcctgccttgcaggctcttggcggtttggcattttcggggacttgaaactgcacaggactcaacacaaactgccagggtgcTTTGACTCAAGcg
>symbB.v1.2.003809.t1
TACCCAATTTGATTCAAtttgctagcggctcacatttcttccacaatcatatcttccccccccaaaggcatgttcacaacaagtgatacgggtgtatcgtctatataacaccaatcttgtcgcaatcgcgaagcctttttaacgccagacagtttcagtcgatgcaaaaacacaaaaaaaaacaaggacaggccatggcaaccaaatccaccaacgttcaggacaccccaacgttttacaaggttttagtaaaggaaaaatattttccctggttttttaaaatacagaaactgttgaatcttgcagtatgagggtggttgtgtctcagagttagggaagctccaaatttgttgtcaattggtagggacacagcctcgCATTTTGGAGCAAcctcgaacttcgacgct
>symbB.v1.2.040090.t1
CCATTTTGGggtaacatcctttttgtgacaaaccctgggctgaaagcaattcttgaaccccgtcactaattaaggactgcttttgacggacgttttcttgatggtggatcaactgctcggtggaacgttgctttccaagcgtgacgttgagaaggtggtacaggcttccgaagaagcgcaaagactcaagcgactcatgggaagcttgcgatacctttataggaaTAGCCATTTGGCCAAattagtcttcgcaacatgtactgtaagcaaacaacatacaaaatactttagctatagtgtaagatcttgtattctatagatggactctaatctacatttgcttttcagaggggtaccacgcaggcaagacctgccccttcactaaggtgacaaaagcttcaatccccgagtatccgagttgaaggga
>symbB.v1.2.017640.t1
GTGGCCTTAGGGCTCAAGgcttacctaagctgagtggtgtgtgcctttgttagattgaatgtgcaatgaggcaagaattgtatgagggagataaatccaggttttgccataaactggtacctttgtacatctttgtGCCACATTTGGCTCgaaatctgtgattgagatgtgcggaggcgagatgaacaagatcccaccttggcatcctgttatgaaacagaaatcacgaaccaagatgaagttctgtcgatattccagctcacttgcttgatgccaggatgccccaaacttcctggaacacccttcgatctttgaatatctgacggaagattgaaattcatgtattgaaacctccatcaatagcagcaaatgttgagcagatggcgctaagctgccattgcatgttgcagc
>symbB.v1.2.011556.t1
TGGCTCAAGaaggggggggtggggttttccagaaggatatgtgtttagtaacttagtaggcaattgattcgagatagtacaccacttgggaggatcatcccaggacttggatacatggttaatttgcccatggtatcccatggttagtcagtaagtcccgaagacctggggcaatgtggggcccccttccaaattgactgaaaaatggcttataaatccggatagatatatatatatatatatataccagcaccttccaaggggtgccaaatggttttaaggggtgtcaattaaccatcccttagggtttatttggcaccctttggaaggtccaggtacacacatataatatacatatttacatccatacatatccggCCGTCATCCATTGTGGaccg
>symbB.v1.2.041560.t1
ATTTTGGATCAggaacagctcaacagatgcggaggctttggcatttggcatGCCATATTGGCaccacgcagacatcccagctttttgtccaataggtg
>symbB.v1.2.031834.t1
ATTTTGGCTCAgggattgtctgccttactggttgttttggaaggaagttggtccttttctttgtcatggggcgtaaaggcaaacgtgttcatgagcaatcagtgggtagttcggctcaggcatttgactacgaaactatccgaattatcccaacacagaagcaagagtctatactggaactggatcttctgcaccttctgggatctcggctcctcctgggctagaccctccggaaagcagagctgaaaccactaggccacctgttggatcagtcacgtgtcctctcctacaaaagtgccaatattgtcccctaccttgctgccgatgtgatacttcacacgttctccaccgttgtaaacagcatgtcaattgGTAGCACTCTGGCTCAAGccttttccgattagagcagttgggctctcgtcgttggctttctcagggtg
>symbB.v1.2.037086.t1
CATTTTGAGCTCtttgtgtaacatcttttttttcattgtttgagaacgcctcgtgcagcctttaagagctttggcaggaagcttctagaagaagcctgaaaccaatggcagcttccgtagctcaaacacactagcttgatgtagcttgcgtagcttggcagggttttcctgctgttaatgactgcaaactgtccgtgaccttgcaccctttccaatttaggtactggtgttgcatggtgtcgccctgtccctgtacagatgggcgtcgacagtcacaagataatgggtgttcacgagcgttgtatttagagaaaacaaaatcatgccgcctgcatggggaagaatctgttttcagtgtccagattgtttgcgtgggatgtgtttagagcagaaatatgtttgcaagcTTTTGGCTCAAcagcttggttcctactgtatctgttttgtcacctaaaaaaaaac
>symbB.v1.2.020365.t1
TTTTGGCTAAAGtgctgTTTTGGCACAAGtgctgctcatccgcttctcttcgcgattcacgctacttctgacttcttgtcagtg
>symbB.v1.2.042037.t1
GCAATTTCTTGCTCAAagccgttgtagatatgacgattcaatgggaaaaggtcacaatatcgggtcattcaatcagagtttcatgtttaacatgtcgttttttttgtttccccaggaaatcagccccccaaccaggacaccatgatgtcgtgtttaaaaaaagtgacgatcaaaaccatggactttcagtcagttaagcctctgattttttgagcatctcaccgaatctcatacttactggataattatctgggtggtggtttcaaatattttttattttcacccctatttggggaagattcCCATTTTGACTaattttcaaaggggttgaaaccaccaactagttaataaaaacatcatttctgaaatttctcccatttgcccaatgtc
>symbB.v1.2.025088.t1
TTTTGGCTCttgggcataccccaaatgtaccctacgaattccgaaacccaactgaaaaaatgcttgattttggagggcagtggtatggtacccagccgtgcagctggagaaaacgttcgtgctctgtgattacctcgggtgcgctgtggaaaaaaagggggttccatgtggGTTGCCATTTTGcgccagtaatccttcggcaaagcttttctttgcttgcgggcaagcgaccgttgaccgattgaggcatgaagacttacttctcgcgacccgagtccctcccagaacttcgcaggctcagagaacacatcaaatggcacatatgatgtggccgaatagctaatcccatggaatctcggtgaaagtgtttgaccacggatagtaaatcgcctcgttgagacttcgagaacCCGTAGTTTTGTTGCTCAAGagcggtgcagacttttggcacc
>symbB.v1.2.022554.t1
GCAATGGTGGCTCAAGtaaggcgggcccaaaaaacatggacggaatgaatgacagaaggactcaccgtttcccatgttatgtGCCATCTTGGACTTCAAcaagtgttttattgatctgggctgccagtgttgttttgttttgccaaattccttgccttgtagccacgtgtcttgttgatgattcttggttttccgctcgttgaacatttcacgtaaatcaccttgaagcc
>symbB.v1.2.035275.t1
GTAGCTGTTTTTGGATCAtgtagcgCCGGAGCCTTTTTttttgtgcaacagcacgcaggcgatctcgggggcagccagaaatcttgagattgctggtccaaggaacgtgactttcatggccaaaccataagggattggtgttttcaagaaggatttggcgctacagcatttcaaggggaagttgttttgagtgtcaaacctagagaatttgccaggcaagccgtcc
>symbB.v1.2.026187.t1
GTCGCCATTGTGGatgtttccttaaatagtgggttttccccccaaaatcatccattttaatggtgttttccattataaacttataaaccatCCATTTTGGggtgtttccccctatttttggaaacacctatatatttatcaagagtatgcgaaaaattggtgccaacctatagtgattcccagctgaggtttttttttttgagttgccaacctcttttttcgccag
>symbB.v1.2.035233.t1
CGTGGCATTTTGGaacatcggaacttccaaaatgtctccggcgctgaggtgttttctacattttgacgcgcaaatgtgcttcgcgccacaaccgCGTGCCATTTTtcacctgtccgcgagacagctacctccgcacccgccgctttagcgaagctacttttcgaacatcaggaaccacgactcattgaaaaaacacagcgattcgcgacgtcactaacatttggcgcgcatgctgaactccttgctactgactctacacgcatgttgatcttcttgctactgactctacacgcatgttgatcttcttgctactgacatgactgctgtgcgactctgcttttcaactctacatattgtcggaagttagacttctaaacttccttcgaatagttggatctcTGGCTCAAGgttttcttgctcgtggtcctccgttccgcgttcgg
>symbB.v1.2.029455.t1
GCCATTTTGGtacagagtcaagccagtcttctggaatccagtgaagccaggctactgtgcacgacttggatcccatctacctatgcattgcattgcaagaagacataaagacctcattctcggttgtgttcaggttttttttaaatagcagaagtgcccatacaatgctaagccaggaaattggaagagcaattgcatcccatcaaactcaaccccaacatgcagccccaaaaaccatatttggggatGTAGCCCATAGTTAGCGCAAGgacctcaacaaaataggggcctattgtaggtgtccacgttacgaatagggggttaggagagtttttccaagttgctcactgctttgagctcttcaatttgtgaattagagcatttgcttacgtcctgccttgctgaggtttctggtcattgtaattcaattcgagtctttgttgttactctatgggattggttgaatcaccagac
>symbB.v1.2.033661.t1
AGCCTTTTAGGCTagaatggacgaaaaaaatgggtcagggcggatcaatatatttgcgcggcagcttctctcgtacagagtccaaatgagaaagcaagttgagacagcaggaattgtcaggtttatgacagccccaagtgtaagtgtaatggaagagggggggggccaaattgaagatgatttacaaagcatgcatcataatatgttcggaAGACGTTTGTGGCCCAAGcacttgcagtgagtgctcaagagtcgcagcc
>symbB.v1.2.015254.t1
CCTTAACCATTTTTGTCAcccacgacctttccagtgttttgtgggtacctggttaccttgagtggtgagcaagttcccaatttcatCCATTTTGGacttgcagcttccaatcaaggtgtagttgatcgtgtaatttcttattttgtgattgtcgtgtgtggtgtaatgtcggagccactgaccatggcggatgtcatgaag
>symbB.v1.2.008723.t1
CCATTGCCAATTTTGGatggacggaggtaaatactccaaggttttagcataattacagcaattctaagacatgggttttattgtttcctcctcccagctcattattggagccctaattcaccggtgagccaaagacacctgcggaaccaattcactggcgcaggcagtgattttccttggaggtcttgtccaggcaatcgttgaccttatgtttcggcaaggcattcgtctagtctgcgtttctttccggctTAGGCATTTGGGCagcggcagagtggaagtggcaatcataagtattggcacctcgaatcttgtcctgtcagctgcttcgtgacagacaaaataaccagaagtgaggctgaggacaagctcacgacaaaaaggttatgcagcacctcccactacctccaaaagataaacaagttgcttgtgattgcacttcttttaaaaactgacctcatatattcaggtcaaggtgaaatgcatgtgtt
>symbB.v1.2.001680.t1
CCAACTTGGCTCAtttgactatgtctttgcgagcatcagtgaacatcagtgaagaaatgacccaatgtagcagaattttggcaCATTTTGGCaccatagttgggagtgttgcatgcaggaaaactatcaaaac
>symbB.v1.2.018498.t1
CATTTTGCTCAgccatattctcgtagtggctaagcttcagctctggagtcagccagAGCCAGGTGGGCTGAAGgatcattgggcgtgatgttaaaacccaggtttttcttttgggtccaagaaagcaccgtttttggacctttttttgttcaaaatcccaaacattgggcaaacgccactccggatgatgtttactgcgcagagaaactttccaatgagaatcggtgagaatcagggaatagcaatctgttaacaccaatcaatctccaagtctgcaatatatgtatatgaatataatgtgccttgttacgacattcttgctgaaggcc
>symbB.v1.2.035496.t1
CGCAGATATTTTGGCggcagggtgctgcttggcgctcgccaggtgtctggcgtccaccagtgtccaggaaggctcccttccagtcagatcttccgctgccggaggtggcggaacatttgggagttgatttggttggtgattggtgggcctgtgagttcctactcgtaggtgggcaatctgtttctttggtttattagggggtctcttatgggaaagtcgaaaccatctcttttttgcaacctttcaatttgaagaacctggaaaagttatgaaagtttcatgtttgcctttggatcttagtttgcttcaaaaatcattctggattgaagcatcctagcaatgaaagtgtaactttGTACCATTTTGGactgcaggtggtg
>symbB.v1.2.031744.t1
TAGCCATGCTGGCTCAAGgtactactgctggacaccccagcgatgaataaatctGCCATTTTCGCctggtgtcgactcttgtttcgatc
>symbB.v1.2.007398.t1
CATCTTTGGCTCgttttgaagtggagagaatagtgagtgggcaagatttgcatgcattcaaactcgaagtttgatGCAAGTTTGGCTCAga
>symbB.v1.2.006899.t1
CAATTTGCTCAAGttggcctacacgtgtatatatatatatatatgctgcttgatatttaaattaaggacgcactttgcacattttcagtacttgacagaagacatggcattcagagaaaatcaccctgggcatccgtaggtgtctttccatcttggacgttcatcgcgacatgattactataccgataaattgtaaccatagttttttctttgggggattcaggaatgacaaagcaaatcaaagcaatcatgaactggatgtttccaaaagtaggggtacctccaaatcatcaattttaatagggctttccattataaaccatCCATTTTGGggtacccctacagcatctttagcacctggcagctacctgtgtgacataacatccttcgccaacc
>symbB.v1.2.031250.t1
ccatttttgcTTCGGCTCAAGcacgtgaacgcatcttacgccctgacgacattgctggagtcacttcagaggtttgtcccttgtgcttgcagcccatcaaatctgtcagatgttccaaaagatttctgcatgtgagtcaatcgaggtgctgcgaaagCCATTTTTGCT
>symbB.v1.2.010215.t1
AGCCATTTTttgttgtttgtcctccaagaaatcaaacgattgttgttccaccagtattgctccctgcaatgacccaactcaagttgattgatatcctgaagctgaatctgcagctgcttttacaaaccataggaacgaacgtgaagattttggaccatgatatcagacttcgacatttctgattctgtatgatttgatatcctattgacattgctggtgagaaaatggttgtccaaagttgcaagtgattcatgctataaggttcttgcagtctgtttgaatgagagtttccacgcattgctagcagatgatttgatattcaatgccattccagcaatgacatcagccataatctagatgatttcacaccaagcggaaacAGCCATTTTGtacacttctcacttgtgaccagctatctctcttgccc
>symbB.v1.2.010964.t1
GTAGCATTTTGAACGTCAAGagggtcaagcgcaaaatCCAATTTGGACTCAcaaattctgcctttcaggaaagatctg
>symbB.v1.2.035165.t1
TTTGGATCAAGacagaccgtctaaaagtatatgctatccaaatctaggtgaaggttgagatggtgtgagtggcgaaggggggtccatgatgggaatgtaaacacggaaacgttcacaggaccaaaaatcggacacatggttgcaaaacaagcaatgagctggttgtacaaaattgttgttcgaatggttgtacaaaaacattgtgattgtattgttcggcaccattctccaagccgattttgaatgatagaaaattggcagcacttgtagtgtttaatgcaatgaaacaataaccaatctgtttcacttccattcgctttccaagtggcgccaaaaacactttctgtatcatagaagttagtgctgggttgatcattggatcaacgattttgtttcgatcgtgagcagtggctttgcgtcaggaaccatggacagtgttcgcgccctCCCTTTTGGCCAAttatttcgtccggacaacttcgtgttcggtcaacatccat
>symbB.v1.2.026652.t1
ATTTTGTGTCAAGtttagatttcttctgtcaggagaCCGGTGCAAGTTTGCCTTCAAGgcgtgcgctttgccggcttagcctaagcgtaagttcaa
>symbB.v1.2.004320.t1
GCCATTTCGGCcccatcatcttttgagatgttagaatacaactgatcaggactgtcaatgttggtattcactgcattcaatccgtacacttacgctgcTTGGCTCAAGctttccccatgaacaaacgcgtcatttacatggctgcaaggcgggttttgcacctatggcctttcaggttaacataaagttgaatatatgggaaagctgtttgggcaaaagacatcagcatgaattgttcttttcttttattcatttgttgttgatgaagatgtggatgatgttgaagtgaagcgccagggacgtgcagaagg
>symbB.v1.2.027956.t2
TTTGGCTTCAAGtcgaaactaaagtccaactttCCATTTTGGtagcttggaagctggtcgctgttcttctattggtcatcaaggactgtacaacaacagcatttgtaagatgaagaggacgattctgcaacgccgcagattgggtctttttggacctttttggcaatctcagagtggatttacatctctcgcttcttagagcattttctggaaagcgggagaatcgtgtttccccaaactaccccaaagtgacttttgctcaacaattctcatccttgtttcggcaaagaccgaagcc
>symbB.v1.2.010652.t1
TTTGGTTCAAGtgtaaataaatggtctgtATTTTGTTTCAAGtgatttgttgccatggtttgcatttctacgtgtacttgagtaattattgattccatgttttatttgttttaaggtatcatcctgtgtcatgcgcctcaaacatcctctggcgggcagtgccaaaaacaacactctgttgggccccccgctacactttgcgttgatttcaCCGAAAGCTTTTTGGTTCAgaggaaaaacgctttgcttccatgcagcaggccaca
>symbB.v1.2.009174.t2
GTACCATTTTGtgatttggtgaggtgtttttctcctccaatctaatctaatgtttcaaaaccaagtaggtaaaaatgtgtaatgatgagacatgtaaataatgaagaatccagtcagcaaagcgatggccccttcatcttctgcgagaagatctcctgggagtgcgccatttgggaaccacccgggaacagcggagctgaggggatgaccgcgtggtttcaatcacaccacctctaatcactaagttgTTTTGGCCCAAGaaagttgttcgcaggtttcgttttcgttttgtcatt
>symbB.v1.2.026260.t1
TTTGGCTCAAatgcacaggcattgcacttgtctcactgtacgtgaccatgctgtaacactagcgccaaagtgactgttcggccctcggtaaagcatcagagaatgtttctggttggggccatagggtgtgatcaacgcgtgaatagagctctggaagtgcaaacagggaatcttctccgctcgtggcaggctttgcttgtgctggttttaccttggcatggCCGCAGCCATTcacttcgcaaaccctggttgccctaaacgccatcgcggatagcc
>symbB.v1.2.026922.t1
CATTTTGACTCggccaaggccgccttggagaattatgcaacagctttgcaaaatcttgagaggtgcctttgggataacttcggagaagcgcCCCTAGCTATTGTTGCTggcatatcaaaaggtcctgattctgatcaatgtgaatggcgtgtcaatgacagttttttctctattgggagtcaattcgctgtcatcagtcaatcaaattgtcaagaattctaaaatggcagctggcaactttgcaccatctctggctaggctgaccttcgtagaatacgctttatcttctcaactggcttccaaccaggacggagttttattcttgtctggccacgaagttgtagtcttttgtgcagaccgaagtcagtttgtgacacgctcagccccgtgcggtgcattccaagacaaagctattttctcgcacctgagggtcattttttgtgaagctgccatggaacaggcg
>symbB.v1.2.024284.t1
CATTTGGGGTCAAGaaaatcaaatatttggtagaaagatgatcctttttttgtctcttccagtaccattgaaatgagggaattctacaggacatcaggcgcccttaaacaaaacgttgggaacgaagccgtgctgcatgaaccgtgTTTTGGTTCAAGcgggtgccccgtttgactttccgacgatcttccgcgaagacgactttttttcgacgatttccggggtggaaaaag
>symbB.v1.2.035865.t1
GCCTTTTTTGCTCAtcaacattttgtgagtttgtgagtacaaaggccgatatacaggggcttgGTAGCAATTTGGCatacttcgtggcaaggcagggtggctttgcatacttcgtgtgctccaaaaatggtgcctCGTTGCCAGGTTTGGCTttcaagaa
>symbB.v1.2.000750.t1
TAGCCACTTTGGCTCAAGagATTTAGGGCTCAAGaaccctatttctagattca
>symbB.v1.2.011270.t1
TAGCCTATAGGCTCTAGgatttcataaataatttatgttcatcaacgtgcctcccggattgtcattgaatttaggctcggactatgtgaagagaacgtttgctgatttgtttctaaatgctggaaccaacagtttggccgtaatgaagttcttatccgcagagtttggaggtttggatcggatagcaacatgatattcatgatatttatgataaatgtgattttttcttcaaattctgcagctatcatGCCTTTTTTGCTAAGtgccatcttactagaatgtcctcctattggcacgtccaagtcgaattagaaaaagaaaacaaaacgacacccgtcaattttctgcacacacactcggcgcgcc
>symbB.v1.2.005470.t1
TAGCCATTTgtacgacaggaactgtcataaaagttcatggaagctgcaaatccttctgcaaagtggaaggtggcaagtgtttcgacccagttcatcgcatatttgctcttatcagactgggtctgatgcaaagggatagggaacttccgttgagggccagcacacctggcatctcagacgagcgagtggaaattccgataaagcgaaagtgatgtctttcggaaccacgttttcactctctgctgatggatcggcaaaaagagtggtcccttgtgaggagttgttctcggagtttggacccccaaagtgttcaagtcagtgccaatgagcttggctagttgacttaaaatttctgtgttttgaaagttttggagattggcgaaccgtcttaaatcttaaacctgcttggacagtttgatcgccgcagctggctgtggttctgctcgtttgccgccgagagccaCATTTTGTCTCCAGtcgcgaaag
>symbB.v1.2.031000.t1
CATTTTGGCTGAAGctcagtcctgtgtcttgacgcatcaaagcagaaaaaaacaggagcagttctccccacactaaacgcgcccagaaatcacaaaaaacgggtgggccgctactgcggtacatataccggtacggtccctgaaacaccgttatttacagtacatttgtacaattccgaaactagtggcgttgcagaggggggcaaacgtcaaatcctgGCCATATTACTGGCTCAAGctcacctgagatcaagttatccaaactgttcgttgatatcgtcaataggagaaaagaacacctttgcgatcc
>symbB.v1.2.040020.t1
CCGTAGCCTTTTTGCCTtgctacaggtatgcctctcgctggtggctcatgataccaagcgcaggtgggaggtaatctgcttggccggtacaaaatgacttgtgagaaaccttttgttcacagtatttcacagtttcagatcaccaaaaactctgtggcgtttgcttgaaacttttgtttcctttCATTTCTGCCTCAActcttgacacctatttcaggaaggttgtgcatatctcaaggttgtccatagctgagatcttttgtgctcagcttctcccag
>symbB.v1.2.035363.t1
TTTTGGCTGAAGcttccagtaaaacaaattgcaccaggatggaaatgtacgagtgatgctacaaagatgtgccgcttccgttgaagtttagaaatttgatgtaaaagagatgatgattcagattctcaagacagtttgctggcatctggcactctcaagaatagcgttgaacatcaactgacttcaaatcgttcaacttgCATTTTGGCatcttggttgcaagctgccaccgctgaaattcttacatcataaatcataaatgaataaatatcaggaatctcatgtctcaagccaactgtgaatgcagcaaatctcacaaaccaccatcaagagattgggcctttcgggtcacccgattatgcagaaagtggttgcaacaaatatgaggattctgtgatcccgtgatacctctgatatctccaagtgcctccacttcacttaggtcgtcaagatggcatcagctgcttttgtcactgcac
>symbB.v1.2.025082.t1
CATTTTTGCTCttttttgctCATTTTTGCTCttttttgctCATTTTGTCTCAttttgtctcattttgtctcatgttatctcattttttctcgcaatacatatttatgtattgtagcttttgctcttttctgctcttttttttctgtttattgctctttttttctcattttttgtttttttttgttttttttgttttattttgttttgtttttgttttttttgttttttttgttgttttgctgttgcttgatgttcattgtggtttttcatccgctgtggtatatgtcacccatgtcaaaaatgaaaaattgtttgtacgcagtcaattgtttcaggctcatccttgattcagctgtgtttgtgtcattctttggcatcatgtctttgtcagtgcctcgacctgcgaagcgagcccgtggcagccaacaggtagcccatgtcaatttaatggctttcggg
>symbB.v1.2.016541.t2
CCATTTTGGCgtccctgcagcgtttgaaaaatcgaagacaaaatcggccaccatggagcgcaaggagcaaattcaagagatgaagtaggaaaatgaaccagtgaacaagcacaccatctcaaaatcaattttgtttgatgcacatataggcatttcttagccaactgccatgaatgagtgatgtctaaacatgcaaaatgtatcatgatattcaccaagacattcattcccatatattttgtatatatataTAGCCTTTTAAGTCAAGatatccaaaagacctgtggagtgctgaatgcgttttttcccatcgatccctttgcagcc
>symbB.v1.2.034277.t1
TATCCATTTATGATTCAAtgtaaataagatatgtgtttgaaatttgatatatacaatacatgtatgttagacttttgcacgccttgatcagtgaccaaaggctggattttcagggtcaacttgttggaccttgaactgtatcttgattttcgagactctgtccaagtagaaGTAGGGATTTTGGatattctgttccaaacttgtccaaaggtactggatgccct
>symbB.v1.2.024209.t1
CCATTCTGGATCAtgattgtatacaacttagataaaaacacaatatagttatatataatacacttatacatatgtatatatatatacatactgtactgtatactgcatattttgaaactagtggcaagatgggtctcttcaaatgtatcaagtagttcggtaaggagcaacacatagcacagaaaagtggaccccctttctgggctcaaagctcttctgaacaaagcaggtgcaacgacaatttttgcactctcatctgaaggctttgaacagattcaaaagacaaaggtttttaacccaaaatcaatagAGCCATTTTttgcgtacttggaggggaagggcgctgcgggagggttggggtgttcccattttaagtagcaacttctcattggggtagcgggtagcgattcaacagagaggggttgacattcatcctgttagcaacacccagaaacatgtattttggccttgagttggaccctcaggttgtgcgccc
>symbB.v1.2.027025.t2
GCCATTTTGtgcgtgttcctgaaagtgaaatgtctgagagtggacggattgaagcttctttgaCCATCTTGGGCTCTAGcttttgcttttgattttaaatcgctttgagcattgtccgtcaaggcatcaatacacctaaccggtcctacagtataaatatccttaaattctgatccttttaattgcttgttcattgattttgtttcaaacatttaccaaagaacccaggaattttaatagcaaatggccacagtccctgcaaactcaacagaccccacagacctccacagtcgcc
>symbB.v1.2.026531.t1
CCATTTTGCCTtgtactctgtgcatcttgcTTTGGACTCAAGtgctccaaactccggaccaactcaagcggcgcacctgcaaaaggtgtttgcgtttgtccttgacaaagtgttctccaggaacccttcccaggaactgatgtttggtacagctggacacgtcatttgcacctcgaaatacatggcatatcggttttttaatcgaatgtggggtgtcattgcaccagtgacaggcgcttgcttcctgcattggtctctacatggtctccacatggtttaatccgagcaatgcggatatcctaaggcagct
>symbB.v1.2.039167.t1
GTAGACATTTTGTCCAAaatttctcaaagaaaaattccaATTTTGGCCAAtttctccaatttttctgctttgtgcgtccgccaacaaccgccccatgctcatttgcaaattcactaaaggaccttacaaacatgtaagtttttttgccttttgtggcgtgaacctcaatgtccgggtctgccataatacaccccctggctacactatttgggccctgcagaggtgtctagtagggaaacgtaccgctttttgagatttttcgaacatgtcccaaacaaacctggggccTAACAATTTTGGCTCAgttttgtcctggattgaagtccgttttttttctccaattttgctgctttgtgcaatttgactcggtgagaccccagctattgatgatcacgcctggcaccttcggtgcgggcggatttggtttgttttccttaatgaaagtgttgtatttggatgtcagcccttcctag
>symbB.v1.2.040654.t1
CATTTTGACTCCAGgttctgtttgtactcttcccgtttcctagactgactttgcagccttccttgacttttgacttggagtgtggggataccactcattgattgcttttgacatccctgcacgctgtgcactttcattcaagaagtaggcacaagtggaacgattgggatcagcttaggaCCAGTTTGGCTCAcatttcatgtgcaatcgatggtatgatacttcaaaacttcaaagtgtctaagcgaaagactctgagcccaactcgggtgacgctttcgtggcaaggtc
>symbB.v1.2.017963.t1
TTTGGCTCAAacttGTAGCTCACTTTGGCctgcttgacagtgaggcttgtgttttggttggttgagccaaattgaaggcattccccatcatcccctacaccctacacatttgattgcagtgtacagagtacatttccttcaccaggggcaggcg
>symbB.v1.2.007130.t1
AGCCATTTTttccatcctttatctcaaCATTTTGGTTGAAcaattttgtcgatgtttgaggaacagttattgaaaaacacaacacatgaaaggcattaattcaagataatattagcagtatatctgcatgtggaatctgaatgtctataagacactgacattttcaagcctcaaatcagcacggttcgcagctgttttgcc
>symbB.v1.2.000845.t1
CATTTTGGCTCtgggagatctcgctgttcgctcaaagtcgtggccttgaaaaaagcacgtttcggatcgtgtgtgtctgacacgtgtcaccaagcatggagacctttgggaatttatggccccatttgtgtgtcaaaatgtgcgcaaaagctacatcagatttgaagaattttgcagaaattctttgggttttgcattcgctcttttagttgaagcagtgtgaatgtcccaaattgtgagaacctcagaggCCCTATACATTTCGTGGCACAAGaaaaagaggagttcctgaactcctataaccttctacataagatttgtcgcgatctcagagagattctaggatagaaatggatagacaacatgactcacttcagtggtagctgatttctaaggaacct
>symbB.v1.2.029091.t2
CCGTGGCCATTTgattcacgtcgcatggcaagatttggggggaggaaatgtgtcacaagcgaaacgacaaaaccacggagtagctgatagctggctgtgttcaagatattggaatgttcttgcagGTAGCCATTgaacagtcaaagaccctcatgtttgaagtggaccggaggatctcagactaccctagcatttgagtctcaggaacagaatttccgctggagtgaaaaaaagctggatattgatgtttgtatgtgtcagttcttgaaaacttagatgtctagcaaagatcacacataaacacatattgtatatatgtatgtatatatatatatatatgatttatgaaaatgcaaaaggatgaagagggatatgttgtttacatacaggaaaaaagtgacacactttgaggcaaagaaaggcccaaagatcag
>symbB.v1.2.005630.t1
GTAGCCATTgaccgggatttggcaacatcatttaaattggtcccattccaatacaattccaggaaaattcaaaaaggaacacatgatccatcagttcattgacccttttgcttcatttggggatgcatacgtggcTGGCTCAAGgttacaggtgactccacaagttgtgacaataaatctaaggggtaacatttggtagcactaagctgtgtgagaattgcacttatcatcatagcttacactgcaattcttgggcctgcaggctcttctttgcaaacccaaacccacagctggatagtgagtggcaaaaaccggtgcaaatcaagtgcaaacgggtcagtgcaaatcaagtcagtgcaattgGTAGCGATTTGTCGCAAtggccaaacgggttatcaccaagtaccaggagtacgtcgctgaggctactagctcggctcaacgccgcaag
>symbB.v1.2.009763.t1
TTTTGGTCTCAAatgcaaaggtcttaggatgcttcaggtgctacattaggtgcatcacgagtctttaacattgccaaacaacatcggtatctccacacatgacgacatgccgccctggattttgatgcatgttgctaatgctttgaagatgccaaattctcaggcAGCCATTTCGTTTCAAGatgcactttagatgatttatgtgtgatattctagactttttg
>symbB.v1.2.002582.t1
AGCCTTTTTGGagaagggtctattacaccccaatattccaagagtcgagaatgaAGCCATTTTtgaagtgagaattttgaatgaaatgagccgacatcattgggtcaacctgcaccgatccaccaggcagcgatctaaccagg
>symbB.v1.2.011036.t1
TGGCTCAAGattaggcttccagagagcgacggagtcatttcagtcatcacatgccatttctgatcatCCATTTTGGGTTAAcagcttttaactatggctattcccacctgttcccactacagtagacatatcctagcttgaagcgattgcagcctttgctggtgtttggaaggtgcatactTTTTGGCTCcctccggagcc
>symbB.v1.2.020651.t1
ATTTTGGCCAAtccgccagtcaaaaaaagagctaaaggatgaaacaagtgtacatgaagagtgccaaaacccctactgtagctggttcacctatgtagcgcttgacattatccctttattatacgtgtttacatattatatccaatatggaaatcaaaattggtacaatgcaagttctTAGACATTTTGacacttaaaaacacggtggtatttgacatgatttcacattacgtagtaccttacccacttttatctgcaaatccaaggcacctg
>symbB.v1.2.041282.t1
CATTTTGGCaccggcctgatttttcgcgagTTTTGGCTCAgtcatcgatcgaatccagactcgctggttggtgagctggtcttgcctgaagttccatc
>symbB.v1.2.009910.t1
CCATTTTGGttttgaggatgcagttccttggagaacaaaagcctcgcagcattcaaagttcaagccaattttctcattccaaacattctttttttggatattgccccgaatatgaccgattgataaaataggggggaattctcattggacaatcctcagtattttggcattttttggtgaaagatatcggggtcttcttcggtgattcctccgcatttgtcAGGCATTTTGGtgtcggccgaagcaaagaatggtggctccccagcctcactgtggcatcgttgggcagctgcagcggccattggggtggtggaactgggtgctggggaaacgggcttagcagggctc
>symbB.v1.2.022519.t1
TGGCTCAAGttttgcctgtgtgagtctcaccaatcagatttttgccaggaggctagatctgactcgacttggtcagtggacaatggaccatcatggactatcatggaccatcatggattatcaacaagaagattcaAGCCAATTCTGGTTCAAtcggagttttgggtttcaccggagaatgacatgagctgctttccttcactctgcaggtgcagct
>symbB.v1.2.040510.t1
CCATTTTGTGCTatacatatttgttcacattatgaaaggtaaatactatcgtaccttggttttgtttgcttccaggttcaacaatacttcaatctgaagtatcttttgaagtagtgctgtctgaaatgacatgcctactgataagagcctgcaagagattgaattagtaattatgtgctgagggatgtgtactgtccccaaatggcttgattgctctatgcttgattgtgatttgtactgaaacagtttgggaaaaattgtgctgaaagagggaatggaaacaagagggagggcacatgtgatgactgcaaagtcacacagcaatgatgactgcaaagtcacaccatactccaaagaagtttatgttttgtctgcAGCCATTTCCTGGATCAAtatacatttgagtgtacattggtttcctgattgtgatgccagttcaaaagaaacctgcc
>symbB.v1.2.011519.t1
CCATTGTGGCTAAGcagcagaaagctgatgcacttgggacactgggaccaatgctggagaaagatggccctgaggcaaaagtgtctttggtgttgatgagcctttggtggtcctgaactcagagatttgtttggacataagttcaccttacaacatcagcgctgaggctcatgttcgagtccaactgagagacctttcagacttgcaccttttcacatacttgccttgaatgatggcggtaaaagaaggtgtttcagaaaagcatgttgcaatCATTTGCGCTCAAaggccgcacagaatgcccaagtgaaaatgatatgcacttcatgtgacatttgattctcctgtctccgaatcttgtgcctaaaagaatctctgcgcagttgttcacttcctcaaagcccacagcgcgtatgttgtttttccccatacctcgggttgtgcagactcc
>symbB.v1.2.002506.t1
CCGAAGCTATTTGAGAGCTCAggcgccgtgtaggaacacacgccatttccgttggacCCGTAGTCTTTTTGctg
>symbB.v1.2.015092.t1
TGGCTCAAGtacaaaaaggtgcgcattatatgcaatttgtagatggtggtcatttgtcaccgttcgcttgtttcaaaaactgtaatttcaagtcctcagttcattcggactgccgggaaatccgttgccagcttattcacaccagtatcgacaatttgcaaatatgattaaatgtgactGTCGCAATATTTGGCTTAAGcgtctcaaggaacgctgctcctg
>symbB.v1.2.040352.t2
CCGTGCATTTTGTATCAttttgtaaagggccttgtcccatgcattcccatgcattttgattgagacttgtgtgagggcatattcggcatcattttgtcatgacaggaaaagagcagattgatccagttttcatccaGTAGCCATTTTGttttcagcacccgaaaaggaagtctctgtggaagcaaaaaccttttcaaaacttcagtaaaatgcctggcaaaacttcaactaaatgtgcgattaaattcacccctgaggcggagtgcatcagtgcaggaaatatttctttgaaagaaaaagcactccgagctactatggctggttg
>symbB.v1.2.031612.t1
TTTTGGTCAAGgaactttatacctttgcgcaaagcctcagcgaaggcgctgagggtaacggccctttagccgttgggtgcttggaagggaagattaaggaagcaagcaataccatttgaaactctgtgaccgcaaatcagggagctatacacgatttgcaatcccttgttttATTTTGGCCCAAaacctagatgggtgggcgaataacttgctcccattctcttgttgcacacttggtacgttactgaaccgctttccttagagtgaaagtggag
>symbB.v1.2.028881.t1
GTACCATTTTTGCgtatttaaccctccaagtagagacccaccttgtatattgttcattggggtgctggaaaccatgtcgacatgattgctatgattgcgacatcatcaggacttcactatatggatgtttccgaaaacggtggtacccaacaactattggttctcctactaaaaatgaCCATTTTGGggtgttttgggagtacccctattttcggaaacatccatatatatatatatagatgtcatcaaCCTTGGCCAGTTGGGCTCgtccctggccgggggttgatcaaatcggttttcccccccccttcccctaaaagccaaaaccc
>symbB.v1.2.026288.t1
GTGGCTTTTTTGGGTCAcggtgaaattcaattagacgtatagtgcagttttaccgcagtacaagttctgtggatgtgctgctcaaaattcataccgtgaaattccgtgatatgaccgagaaaggaccccaaatgaccatgaaaaaaccgagaaatccgtgaactccacacgttggtttttttctggaaattggatgttcacagccgagaaatctgcaacctccaaagttgttttcgtgaaagttgatgtccacaactgagaaatttgtcattgtcttgatcatatatctggtggatgctttattttgggAGCCATTTGGCCAAcatcggggttcttcggtctagctaggtaaaggtcggacctatggcccttccgtgtttgcagaacttgccattccccattg
>symbB.v1.2.024286.t1
ATTGTGGCTCAtgtttcgaagcagctctcagagttggaagggcacttgcaggagttgacggggtataaccagacaaaggagcaccttcaaaacctgcagaacgctttggcagaagaatttgatttagataaggctcccaaacggagaccaaaacagaaatgtaggaccaccagtcagcttcgacgcgctttgctgtatgcgaggaagaaattagaaaaaaaantgcggtggttcttggaccacgaagaggacacatttgttgttatgacgttttgaattcaatataaatgttttaagtggacttgtttttacacatcccaaaaattaggatgttccactttccatgcgtgctgcatcaatgaaggATTTTCGCTCCAAG
>symbB.v1.2.014049.t1
CCGTACCATTTTtaacagacccatgctggcaccaactttttgcagcttgtctccaccatttgcgatCCTTTTTGCCTCAtgaactattttcaagtgcaaactaaaactatccatcagaatctaacattttttcaatttgttgttgttgttattgttgctgttgtttcaatttgtttctaagatttctcctctcccggtggtctgcaatgggcatctttgg
>symbB.v1.2.018332.t1
GTGGCCATTTAGGGTTCAAGgtgattccaagctggtcattcttttcgtgactggctgcaggcgGCCATTTTGacaggtgc
>symbB.v1.2.010589.t1
gtagccatTTTGGCTCAAGtttggctcaagtttggctgcctgtctacgtttgcgccttacgttcttttcttcagGTAGCCATTTTGGCTCAAG
>symbB.v1.2.005105.t1
GCCAATTTTGGCatgaaattgagtagcatcttgccagactcacatggattgatttcccgcagcaaaaacgcacagttgagctccaggcgggtgcctggagctccgaggtgtttttgccctcatcagctgctatctcagatgagaagttgtgtctcgtgtgaggactgcatgaaacaacgtgggcatgggcatgagatgcaccagtcgtcaccagctgccAGCCACTTCAGATCAAGtgcccaatgcggcttccattcaacaagatttaacaagccatgctgccgaaattgtaatgcagaagcaatttgtgcagtggtattcggttgagcaaaacgacatgtgtgacactcctcgctttcccgagtaattaggctatactagctatacttctttaaaaacgtcatgaataaaccgctgctaaacttgcgaaattcggccccaaaaaaattggggggccc
>symbB.v1.2.038849.t1
CATTTTGGCTCCAAGtcaacaatatgttctactccatagtttagttgCGTAGCCCTTTTGcatagtttgggccacttcattatgctgctgcca
>symbB.v1.2.022820.t2
CCATTTTTGTCCAAGaaatcaaatgttcaactttcgtaactgatcttcagttacctggactcgttttgcgtttgctgttgaggcggaggacTAGTCATCTTGGCACAAaaaaaa
>symbB.v1.2.025295.t1
AGACAATTTGGTCTCAccttgctccggcctaaattgttttttgacttgatgatttttttgaattgctatcgCCGTATCGCATCTCTGATTCAAGattggagcaagcttgcagaagtatcactcgaggcagatctcaaggatttctgtcagaaaaaagatctcttctagtcgtttcttgctgccggtcatggaattgcttcagccttttttgtgcgtggaagctcctgaatgtatttcgctatgattgttatgctccagagctacgtggccttgttccgagcgtatttgatatgatgattttaattttatagaaatttatatgtaccatatcatcctgaaatgggtttttcagcaacagcgaaccaggatgaaccagggaaccagaagcagaggaagcaattaagtcaagtcatttctgcaccatttcTATCCATTTTCGCTgttccca
>symbB.v1.2.033411.t1
CCGTAGCCATTTTGGCTCAAGcgTTTGTGCTCAAGcgtttgtgctctttgtgttctttgtcgcgttctttccccgccgctttggtacgatgccgctttcgcaaatccaattggaagctctcaagaacccagggaccatcattcaaatccaaccagaaaatcccaaaaaacctggcagcaaagcattcgaaagatttgatcgctacaagacagcaaccaccatcggagatgcaacaaacaaatgtgccaattggcaaaatttgaccacagacttcgaaaaaaaaaattgaagattcccgacctc
>symbB.v1.2.012489.t1
CCGTAGCCATTTTGGCTCAAGaaacctaCATTTGGGCTCcgacctcccagcggttgataggcatcaacagacgggggccccttttttagcc
>symbB.v1.2.029053.t1
ATTTTGGCTagTTTTGGCTCtttcgagattagacatatccaaatagccgagatgagtcatacctagtcactagtcgttgaattcgcatgaaattgccgggacacggaaacggttgacaaccttgaattttgtaaagacagactgctcctttgcaaggcaagaactatgatcctagcctcgcattgaacgcagatgagagcctctcggatcacatagcaagggggagaatcgaaataaagcgcaccgcgaatcaatctgcattctgcatgtcatgagatcatatgagatcattttccccattccggcaacttgaggcaagccatacttgtcgttgcgg
>symbB.v1.2.032657.t1
GTTGCCTATGTTGGCCAAccgatttagctatatctgccaagtttgatggcggacttggctatgttgacctccatgttggccatgtgcaccggttgcacttagcaaacttattatctagatagcacaaggccaccaacatactaagttggtgcatgtacttagactgtttagaccaacgtataacctaggataccagacttgtatcttaggttggcagacttctataaGTAGCCCATGTGGGACAAGtagatagcaacaaggccgcccatccaagtatgctcgccctggggagctcctgagattg
>symbB.v1.2.032252.t1
CCATTGTTGGCTgcaggggcctggcactcagcacttcgaactagaatcaaactagatgtcagacaacattgatctagaccagaccacagatgaaaatatgaaaatatgcagtgtatagtatcgctgtggttggtattctgtcatacttttggttctctcgagccactgacagccactgtctatTTTTGTGCTCAAtgagtcaccatgcaggcccagcatatctttgcttgcgaatggaacccgg
>symbB.v1.2.036337.t1
GTAGGCAGTCTTGAGCTCAAaccagtcaccagtcatatgaatcatatgaaatggtgatggtgttttcagcttggttgcgtctctattctttgtgcttttgaatttgacattatgcagcaggtttgattgcttgagCATTTTTGGTCAAGtgtgtgagagactgactggcagcaacggttgaac
>symbB.v1.2.031277.t1
ATTTTGGCTtataagtaggccctcctcttatttgctgtttggaacTTTTGACTCAAaaaccaaaacccatcaagtcccaggaacataaaaccgcagacgacgcagatcaaactgaagttttagagccgttgtttctatgccaaagctgtgtcagatgtgtccaatgaagaaacatcgcatatactgtgaatactatgtcatacggacaaatcatcattttacatttgattacatttgaaactcattgaagtcattgcagttacatttgtttccatatgcacatgagacatcatttgaatcattgaaagctccaagcaaaccattcattccctggctttttgggttacctcggcattacagcgaagctgcc
>symbB.v1.2.007135.t1
AGCCATTTTtttcgaacgtcttttttttttggcatcttgccatctccttcaacgattctgTTTGGGCTCAAagattggatgtattgaggtctcacatagattaaacacatcgttaacacctacggagcatatgggatttttcagttagggcaacgttaagggatagagaagaggacaggggtttgttccacagctaaactgtgtcgtcgaagagcttcacccaa
>symbB.v1.2.008638.t1
TAGCCTTTCTGGTTCAgtgaaggagaaattgaaatgcgatagcaaaattcaagagtgagatgcatgactctccatgttggaccggggcatATTTAGGTTCAAGttttgcttgccccctagttggccagggctgcgcagaacaactgtgtcgctgggcaagaagcgattgtttgttgaagaagtctactattcggagattggagggcgtggcgttgagcaagactttgtacagaggacgtacttgacttgacatggttccactcaatgcggtcattctgaggcaag
>symbB.v1.2.008655.t1
CCGCAGCTTTTTGTGCTCgatccgttggtgccctggattctccttcagggtgtttcgctcgagcgcatttcaggaagttcaCCGGAGGCGTTTTGGgggaaacaaaaatcgtgagagcatcagatgatttgaaggagataaggagtttcattgaatgccatagtgttgatggaagaaaatccgactaaccagttgatagatagtttatcccacgatttacagggttttttacatcctaggagtatgaatgctattgattatcattgagccaagcaagacatgtttgacatgtcttggtgttggtgttggtggatttgtgtcctgtgttatgctacgtgcccagtcgaggcgagtcctaacacaag
>symbB.v1.2.002244.t1
TACCCTTTTTGGCaaagattcCCATTTTGACTCAtcttttttccagatggcttgacaacaacttcgctgtaaggtgctctaaaatgccaatttagataagttgattttcggctgcttcttgcgcc
>symbB.v1.2.035892.t1
CGTGGCACCTTTTCGCATCAAagatgcggggaaggaatctcatgacaagcaaaccacttatcaaatgttcaatttcttaggatctttggaaatcaagatctggaatttatatctccacttcgattgcctgcaaacatgcgtcgatccaccatgtggatccaagagctgttttagtcaacaaattcaaaaaatatacagataaattgaataaagatagcgccgtctgtctccattttccaaaaagaactacacatgatcttgcttgagtgcgttcttgatgtctccaggaaacaatcgatttcgttccattgaatcatgccaacaaatggaacttgttcacttgtcaacccattgCGTGCCTTTTTGCAGCAAGagctttcaaaccaaacaaaggtttggttttttgtacatgaa
>symbB.v1.2.012548.t1
CCATTGTGGCTgttgcacatccatgcgcgagcggtgggccaagcccaaattcctttgcgccaagagtcgaggggagaggactcgacttgtccatccattttccggcatagtttaatggagcaacatggagcaaccgactaaaatatctaaaatcgctaaaaaaagtcccgaagaaaagtggcaaccagatgaagatgagaaaccaaccaacttatcattttgcaaaggctgaggtgtgttttaatctggttttatcagatttttgcttactgcatgttccttgtgctttttgctGCCATTTCTGGTTCAAaatgttcaaagctttgtacagaaggtcttcccagctgcatcagtgctcc
>symbB.v1.2.038846.t1
AGCCACCTTGGCTtggtgacctgaggaaagtcttcttggtctacctggaattcagggaagcgcccggagctcgacagggcaattcaggtatgatatgcatgtcattgtaagtgttcgtatatgtctaaacgcttcagttcatcatgacaaagtaatctatcccatgtttcatgtacaagtcccattgattgtttgagacaatctttaacactttgcagctttGCCATGTTTTGCTGAActccttgcgctttggccacctacaacactcaggtcaattgtccggaacttttttgaatctggcacagtggtggcattg
>symbB.v1.2.037629.t1
TTTTGGTTCAAcatttggtttgaactatcaattgatagatgtccacaatttgtccatcagcatgtttaaaaaattggggggtgtgtcaccaaaaccaaccaaacaaaaatggggacacctttccgagtaggtcactgtcggcagggatcctaccGCCGTTTTGGGCTCCAGtgcttagccctgctagccgccgagctggaacccaccgcctccaaacggtggcggcatcttgacccgcttcagccca
>symbB.v1.2.035964.t1
CGTTGCCATTTTGGTTCtcagggttgcagagtaattatggggaatgctccgcaacttctcagatatgacagccacgcagccaggcacggcctttcttcactttcctgccagcagttttgcatcttttcacagtggaagttggttcaattggatggatgattgactttgcaatggtgttccatcctgccgccttcTTTTGGTTCAAGcgttcacaagccgtggggggtcctggccgccggggcgtcctcaggaggcgtgcgacactgacggatcccaagcaagtgaaaagaatggtgacaaagtgccgcggaagttgcccttccatcgtgtgacatgagcatcatgagcattccccataaatgctgcagaggcc
>symbB.v1.2.038603.t1
AGCCATGTTTGCTttgtttcaggcgttgctgcgcatagagcgggagaaagtggggcagttggagcatgaactggcgcaggccattgcttcagcacaacttcccgaggttggattgcggttgCCGTGAATCAATTTGGTTCAgactagacgattcagatggtttgtgtggagtggggttcattttgtaggtggtaagtccaggaattcctcaaaaccttgaagttgtatgtcttgagtgtgtgtgattttactttcaaagcacagattattggcttgcaggggctgttggaagaa
>symbB.v1.2.000149.t1
TTTGGCTCAAccgcttttttttgagaaaaCCAGTTTGACTCAggtactggtaggttccacatgttggaactgcattcagcacagacacagcttctgcatatacttacataccttcatagtaatacgtaggtttggtttagcagcagatttgcatcagaatttcaagcaaaacctcgccagccaaacttccgagagtgttgccatcgcgtgttgcagcc
>symbB.v1.2.035673.t1
GCCATTTTGACTattttttttcgaaggggttgaaaccaccaaccagttaccataaaggggtcccaggtccttggggatttccctggaaataccattaaagccttggattttgtgttttcCCATTTTGCTCCAG
>symbB.v1.2.033068.t1
GCCATTTTGGCTGCAAGccacagcttgcaagggtagaaggatttttgattccacacccacccacccagaacgtggaagagggcagtgtttggcgcagagtatggctgcgtcatggaacctatgaaatggccatgggtttgtcacccaaggccatgcacagtGCCATGTTTGGCagacaacacacactttggaaaaatgcctggtggagcttggggatggttggtgggctttctctaatggaatggaatgaaagcggattgtttaaatatgttggcctgaaatctgcgatgacatttagccagcactttccgtgagggatggcaaatgccttcctgaagtagagccaaggagaaggaccagtgggcaaagatacccgtctttcttcgtgcgactgctggc
>symbB.v1.2.031393.t1
CAATTTGGCTCAtcttttgactccagaaatataatttattgaaattatataaagccaaatttcaaatatctaaatattcaacgaggagtgagagcatcttacctcaatgagcattggaCCATTTTAGCTatggtacaaatgccagcaactatttctggagctccaatcggaaagcccaagagacacacaaaccactaactttcttaccagatgtagaaaaagacaacgtccagcggct
>symbB.v1.2.037251.t1
CCGTAGCAATTcaagattcagagatgtttttgttgtcaccaggaaacttcctgagaatttgatttgtgtatccttttcctagttcatgacaattttgaatttgttcaattttcagcgtattccaggtttccacgaagtgtcagaattgctgtagggtgggggtaaagaacaacaacggggctgtagtatggtgtctacttttgctttcgttggcagcgattggtcttcctatcctgttgcacatgtgcccaacctccttgacagtttgacacttCGTACCATTTTtgatgcctggttttcaatttgatcgagccaacgcaggtgtcttctcgcccacctgcgcaa
>symbB.v1.2.026992.t1
GCCATTGAGGCTCAAGcttggatctctggatctcggatcatcggaccatcggatcgatcagcggaccagcggatcatcggatcatcggatcagcggatcatatcagatcagcggaccagcggaccatcggatcatcggatcagcggatcagcggatcaccggaccatcggatcatcggatcatcggaccgtcggatcagcggtccatcggaccatcggatcatcggaccgtcggatcatcggatcgtcggatcagcggatcatcggatcgtcggatcagcggaccagcggatcagcggaccagcggatcatcggatcgtcggaccatcggatcatcggatcanaagtagcccaccaggttggaagatgcaTAGATATTTCAGGCTCAActttagagtgccagtttaagttccatatgcattgtcgttcacatgaaacgtttgtttcatcgtgttctcagtgag
>symbB.v1.2.010284.t1
AGCCATTTAGGCcaggggaacaagcccaggaaaaggggacttactaaccactaaccatgattactaaccacgtatccaagtcctgggatgatcctccaagtatgactggatgtttatgttcgatggccatccaggttttcgatcgccaatgagaagcagcgacccgaaaAGCCATATTTGTCATCAccattgcatatcacgaatgttgcagtcaacatcttttcagtgtttcccaaggatgggcacttttgtatttttcgtcaatggcaacgaacaaaagtcccaacaacatcaaaaatcccaacaaccattaacagtaacaacaaaaatcctaacaacaattagcagtaacaacaattaacaacactctatttgaacagattttcaacccacctttgaagtcgctctgttccgcc
>symbB.v1.2.018643.t1
GCCATTTTGCTACAAtatcttttcaggcattgccaaaacaacacaagtaggttggatttatgtacaagctttgcatcaggttgcagaggaccgattgctgcctgaacctagcgatctccgacctgcctgacaaaatggtgagagaaatttcgccacagtttgaaactgctgtgtttgacgcttCATTTTGACTAAGcattcatttttgtttttggtgcaaagtaatggcatttgaacattaccaaagttaaaatgaaaggttgaaaccagatgctctttttagatgtcaatattcaagagaagatgataggcttaggcaggtctgttaaagatgagagtgaagtgaaaccgttgtttttttcacctgacctgattttgttcgaaagctcgccggctgcgggctattttgcaaccgaccgaaccc
>symbB.v1.2.006447.t1
GTAGTCATTCTTGACTttggatgacaaggatctttggataaaatttccaggatagacaaaagacactctcagactttcaagctagaaagtgacattgagccaagcggcactatgagggatctattttttgaaggattttggagtgaccttttggttgccgattccttcactcCCGTTGCCAATTTtcaagtaagctgaaggttgctgagcagtacgtgtgctccaaagtcctgcaacctctggaccccattaacttccc
>symbB.v1.2.040930.t1
CATTTTGGGTCAAGggatgaaattctcaacagacattgttacaatgcccacaccctcgatcacagtgttgcaaaggatgtgtgcaaacgcatagtaccagtaacacaggttgtgagatttgagacaaaatgcttggaagtttacggcaatttgagttcggtttcatgagtttgtcatcaacttatggtCATTTTCTCTCAAGattttgacagctgttgatgctgtagtcgacaaaattcattgcagtcgttttcgctgtcgctttccttacttctcagcattcatcactattctcacaactgcttttctggagtcgtcgtttttggggttgccatgtcatgacg
>symbB.v1.2.019606.t1
GCCTTTGTGGCTCgccagggcggggggtatttttgcgtggtatcataaagttatcatataccatgcactcccatgtaggcatgtatatagtcctcgtactactCGTGCAACCTTGGCTCAAGgctcaagtaaaaaggtgcgtactgcatttgtgatatttgctgattgagttggtagcctaaatagaatgtaatnaatccttccaagtgggttccctcttttttcaag
>symbB.v1.2.022166.t1
TTTTGGCTCgctttgagggacagtagggcaaagtgggtggtgaaatatggtgaagattcattgacacatgtttttgttgcatctttcagtcaagctgtaaactctatataataactaattctcaagggttaagtcttgaccatcttgaccaacgccgtcaatggtggccgctacgcatgagcttaaatagagggctagtcggctgatgaccgagcatctcggcagaaggatcatggaacgattatgagtggagtggttcaaatttgagaaagaggggttttaattaacatgttcacgtggaaaatgagatctttgggggagtcttccctGCCATTTTGtgagg
>symbB.v1.2.012682.t1
TTGGCTCAAGttactactaaactgcatgtttgaaggtacattatctcttcaactttgggggcaaatttccgcagctatgtttgatgttaaggcctgacatataaatgtatatagttaagttataTAGCCATTGTGCTTCCAGcacaataagatattgaaaaagaaatgagatcattgaaaacatcgatctcgatgaaattgtcatggtccaatgaattcgaacgatgtaggcattgaaacaaataatggggaaatcgggcaccaagatacacgaaattagatgttgcagaggatcatctgacctgctacttaatcttctccctaaaatcctttggatctatttattccgagatc
>symbB.v1.2.032758.t1
CATTGTGGCTACAAatcttaaagattgcatggtgcaatgaaaaatcataaaaaaattgtgttgttaaagtcggatttccaatgatgtttttttaagttgcaagtgctatttttttggtatccaatactttagacatcgctttgaaatatgggccctgcaaaatggccacatgtttggagCATTTTGGCCCCAGttGTTGGCATTTTGGCgtttatggtttggactgtgcggaagaaccacgcaaacgcaaatcgcagaaacatatatcattgcatccctttgactacgtaaaatattcttcactcatttcacaaagcagtgattgacgaagaagaagcgaacttgtcaattttccagttcttttttcaatgaacttatttttcgacatacgtcttggatcaataccaacatggtaaactgagtaatcatatcacaagacgatgtatccattgtattgcttgactgcctcatttttttgagtcc
>symbB.v1.2.039224.t1
CCGCAGCCATTTatttttcaacatgtcaatcttagattctgcggcccaattcaggtctagagccactgagcttggtctttctcacactgcaatagacagtctgaagacctccggtgtttctacattaggccacctggcatttgcagcaggagctaatcccactgaaaccactccagatggcattcagaattttgttgactctctcggcatcacggatgaagagaagttcattctcaaacgcctcatattcgaggctcaaaccctattcattgcctccttgaaggctcaggtccaatcgtcaggtgatggatccaaagatcctgcaaaaagttgcctccagttgagcgtcaaagtcgcattgaagcccaacgtgaacgtctccaAGGCATTTTGATTCAtggagaaaccgaacccagccatgaattgattgatctatgttttgcc
>symbB.v1.2.012484.t1
TTTTGGCTAAGccatgaaagacttgaagaaacatataagaaaaaacacggaagaacaaggttgtgagcgaaagcacggctttccaaaaagacattcccgattttgcgttgagagttgagatgttgatttgacaaacctttctcaatttttgttcatgtccttatttcccttggcaacttgcatggatttgcaTGGCTCAAGgaagggtaggttttaggtttttcttgaaaccgagcctggcgattctttatcgcttggatctcagtgacacaagcccttcacaccgaccagttccttaagttgcttaaggcc
>symbB.v1.2.040767.t2
TTTTTGCTCAAGggtaagacctgggaatccatccctgagcgcttccgaccccttcgcgctttcacgtggcgtggggtgctcagcgtttggtcgcttttgagtttagttgcgttggaatctttgacagcagcagaacatggagaaccggctcaccggtgtcattctcattgagcatcacattgcatggcaCCGTTCTGGTTCAAGgccttttcagtctttccagattccaaggtagatactatatacgtactacgtaaattgggaaatttggaccttgctattcctttccgtgatgcaatctaaaatc
>symbB.v1.2.020404.t1
CCATTTTTGCCCAAGtcgggtttgattacagattgcaaagacctttttcaagatcaccatacatactatataaaacaatttatgataaaagaataatattccgcaaattagtttgactcggcatggccagttgttttgttcttcgagcgcttcaatcgtgctcatagtctggatcccaagatcgccaaagggtcctggagcaagagaaaatcaagagatatttcggatccatgcggatccttccagatttttttgttttctgatcatcaaaaaaatcgctgttcggcggatattcatcaaaaaaacaggtttaccgatcctgccaaacatatatttcttgatttgtgaaCGCAGCCATTTTGctatcaattccgatttcaacc
>symbB.v1.2.036993.t1
CCGTTGTCATTTTGtgaaAGCCCTTTGGCTCAAagcctggaaaaaggcaattgctgttgcaagcaggaatactggccaaagatgccagatagtgcctgagcctgaaaaattattccaaagtcattgccttagaactgcaattgtgtgcatgtttttccttaaatgcattgtccaatgcatttttgcaagcgcggcaatttcgtacgtgttgagaggccctgaaac
>symbB.v1.2.009913.t1
CCATAGCAATTTGGGTTCcaaccttcaaagataAGTCATTTTGGaacagtgggaccaaacattttccataggtttcctgttcgccagggatgatgttcctctcaggttgggccccgctcca
>symbB.v1.2.037072.t1
CATTTTGGCcttccgtgtttttttttgccacgATTTCGGTTCAAGtttgtctttccctaatctgc
>symbB.v1.2.021193.t1
CCATTTTGGggggaattcaaacaatacaaatctatggcaattttgagggagttccctttatgacaatgcactgtttgggttggtaatataatgacccctgttgttgttgttttttttCATTTTGGCattgtgtgtgtgtggggggataaatttgtactgttttctttcatctttatgatgtataattcttgttcattatcatcatcttcttcttctttttctttttcttcttctttttcttcttctttctgcaccaaaatgtgcgtctatcctgccaaggggagataaattctgaccaagggtggggctttgggaaggcttttttttcaatcaggaa
>symbB.v1.2.016642.t1
CCATAGTTGGTTCAAGgttctatttgacttgttccatatcccaaaggatgaatcagtcttactacctgttctatgaacacttcctcactattgtgttttaccattgttcatatgatcgccaccctccccaaaacgaatatacatgactcatgacccacacatgaccctggaaaacaagcgaacgcgtccttatcaccaccactttcaagggtgtaagctgttagtttcataaagtgtcagtcccctccagtcggacatttcattgaaggtttcccagagttctcccttatgaaagtagcatcatgtttatttctttccttttcctgaacttcaccctagttgaattttgttCCATTTTTGCTAAAatttcctctcaaaaactgtgacatcctcggacccttgacgtctgag
>symbB.v1.2.032824.t1
CCTTTGCCATTTTttcaactccatgtctcgctcagcatgactgggcaaacttttcatgaagatgtacgacgcaatgaagaatgcatctagcattacgaggcatgtaccaatactgcttgacagataacggcgtgcagtggacaggtcgggaattgaacagtttgaaatctgcaatgaatattgcatacagattgctatcttcaAGCCATTCTGGgagtcagaccgcggcgacggtaATTTTGTGCTCTAAG
>symbB.v1.2.037140.t1
CCATCTTTGGTTCAgacgggtggcatagccctcacatgtccacaccatggtaccgcggatcgaaggcactgatcactgagctttacgttggcgttggggggcgggatcttcagcgaaggtttttggattctaggcacaaagttgatgggtgaccagaaaagcagcgacagctggccgtattgcacctGCCTTTTGGCTCAAGtttctatcccttccaagctggtcgccatggatatatgtatccagacagcaactttaagga
>symbB.v1.2.005707.t1
AGCCAATTTTGCTgcccagcaaaatgttgagtgtgggaaaaaacattcaacgcaaacttctttgCCGCTAGGGCAATTTGTGCTCAcagcataaaatcacagcgctgcttcatggtcacattaaaagtttctaaacagtaacaaaaccacatgccaccagactatgactagactatgactatgactcatgactaggttacctataacggtatacggtgtacggtatacggtatacgttataataattttataacacttgtaacctatttaagcctgcctataatattattatgtaactaacttataacttataactaagactatgactataactaaaacttaaactatccaatctcacgtcaagacctcattcagca
>symbB.v1.2.019680.t1
[truncated: 290,128 more chars]
